# Supplementary material for: Coordination polymers: what has been achieved in going from innocent 4,4′-bipyridine to bis-pyridyl ligands having a non-innocent backbone?
Source: Royal Society of Chemistry journal article supplement (doi:10.1039/c2cs15251g), 2012-01-01

## Search Overview

**Search:** search4  
**Date/Time done:** Thu May 26 10:15:51 2011  
**Database(s):** CSD version 5.32 (November 2010)  
CSD version 5.32 updates (Nov 2010)  
**Restriction Info:** No refcode restrictions applied  
**Filters:** None  
**Percentage Completed:** 100%  
**Number of Hits:** 18

*Summary of queries used. Search found structures that:*

match

**Query 1**

**Query 2**

**Query 1**

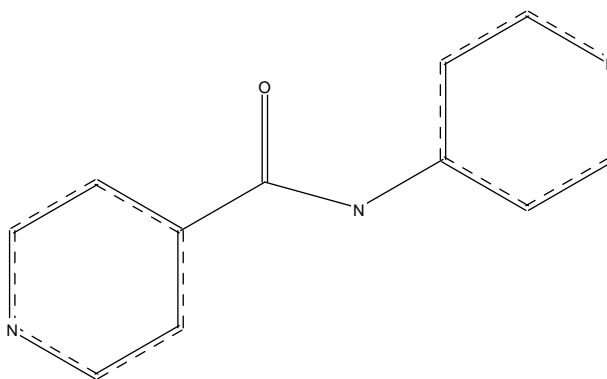

**Query 2**

4M

## Search: search4 (Thu May 26 10:15:51 2011): Hit 1

KAZTOV

**Reference:** D.K.Kumar, A.Das, P.Dastidar (2006) *Cryst.Growth Des.* ,  
6,216

**Formula:** C<sub>11</sub> H<sub>11</sub> N<sub>3</sub> O<sub>1</sub><sup>2+</sup>, Cl<sub>4</sub> Pt<sub>1</sub><sup>2-</sup>

**Compound Name:** N-(4-Pyridinio)isonicotinamidinium tetrachloro-platinum(ii)

**Space Group:** P-1      **Cell:**    **a** 7.021(1)    **b** 9.280(2)    **c** 11.633(3)

**Space Group No.:** 2      **(Å, °)**    **α** 85.92(0)    **β** 83.34(0)    **γ** 76.84(0)

**R-Factor (%):** 3.87      **Temperature(K):** 298      **Density(g/cm<sup>3</sup>):** 2.441

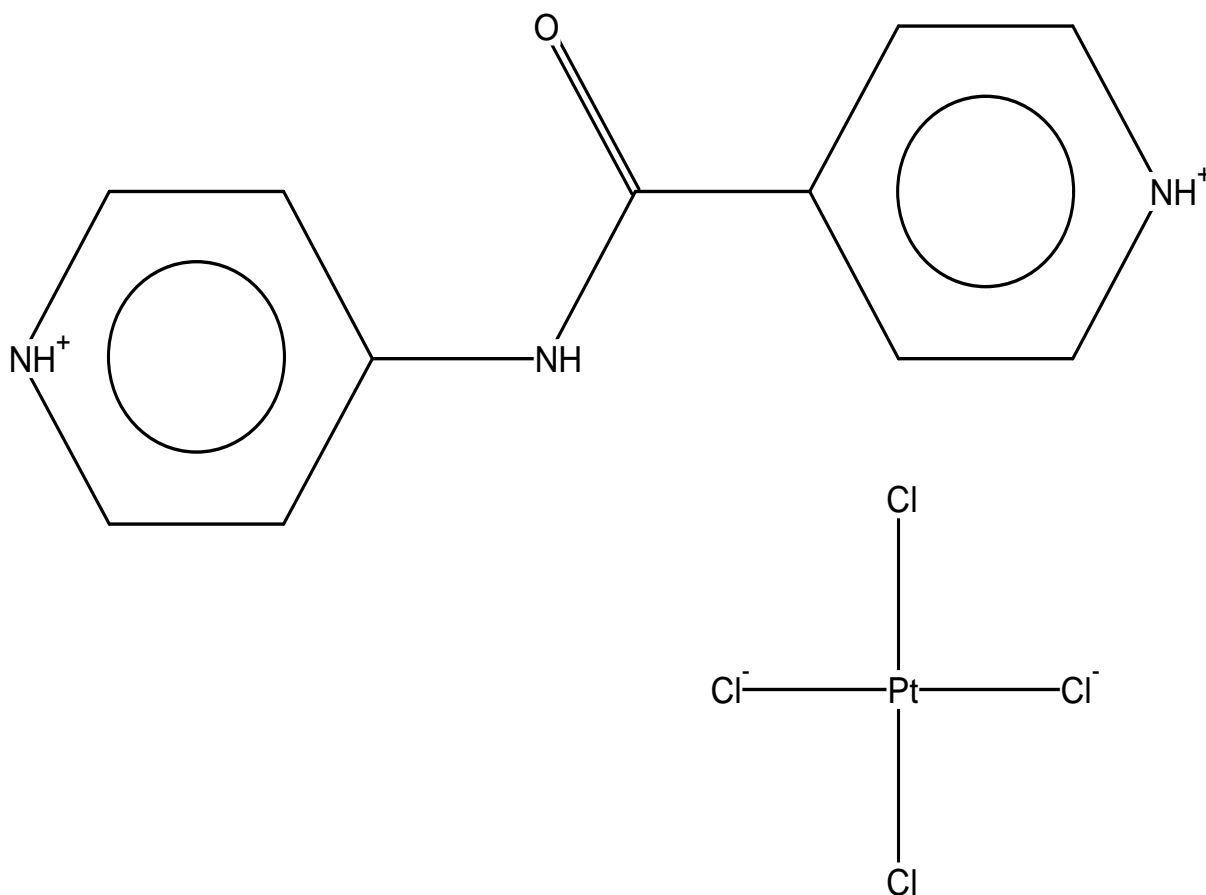

## Search: search4 (Thu May 26 10:15:51 2011): Hit 2

### KAZTUB

**Reference:** D.K.Kumar, A.Das, P.Dastidar (2006) *Cryst.Growth Des.* ,  
6,216

**Formula:** C<sub>11</sub> H<sub>11</sub> N<sub>3</sub> O<sub>1</sub><sup>2+</sup>, Cl<sub>4</sub> Pd<sub>1</sub><sup>2-</sup>

**Compound Name:** N-(4-Pyridinio)isonicotinamidinium tetrachloro-palladium(ii)

**Space Group:** P-1      **Cell:**    **a** 7.091(3)    **b** 8.158(4)    **c** 13.722(7)  
**Space Group No.:** 2      **(Å, °)**     $\alpha$  102.42(0)     $\beta$  95.69(0)     $\gamma$  106.51(0)

**R-Factor (%):** 6.27      **Temperature(K):** 298      **Density(g/cm<sup>3</sup>):** 2.038

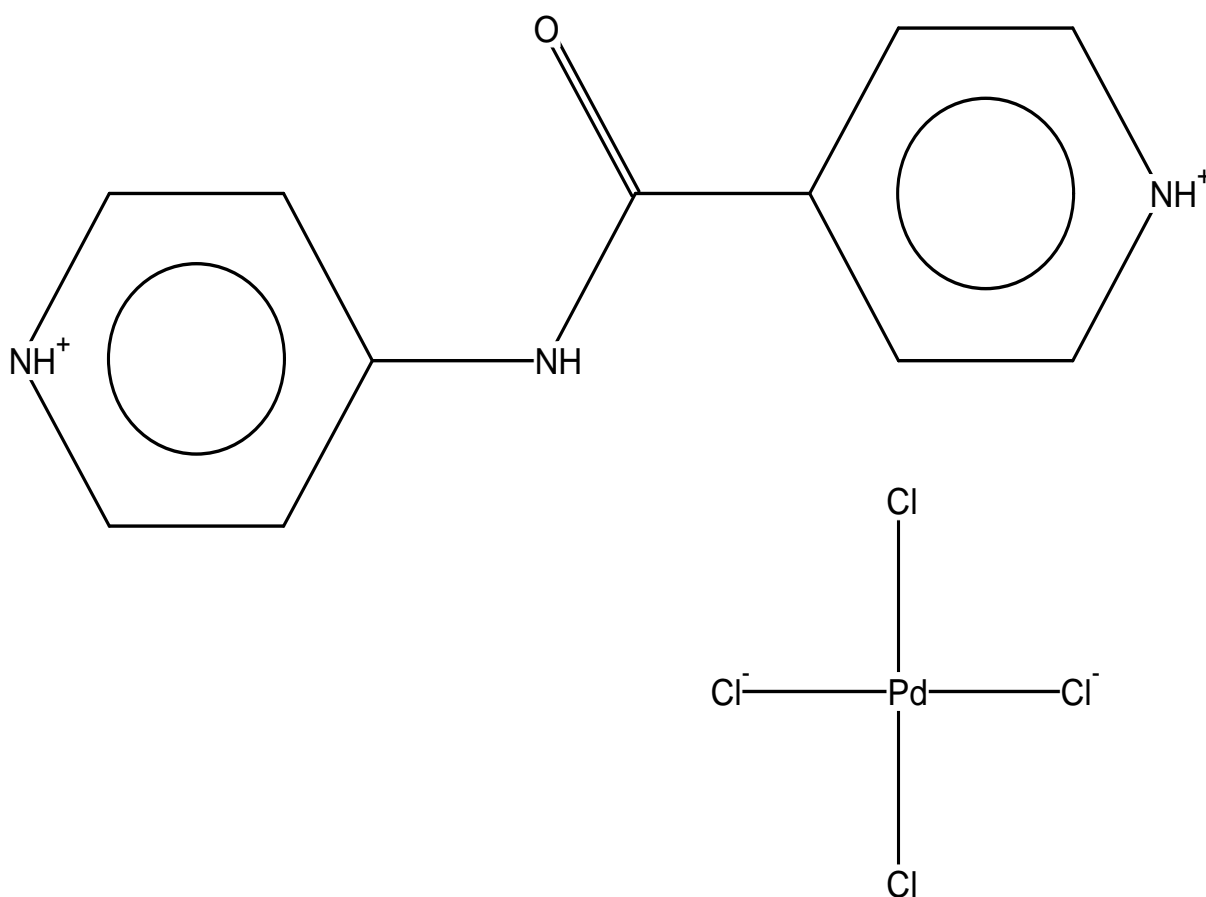

## Search: search4 (Thu May 26 10:15:51 2011): Hit 3

KIFKUG

**Reference:** S.Ghosh, P.S.Mukherjee (2007) *Dalton Trans.* ,2542

**Formula:** C<sub>98</sub> H<sub>154</sub> N<sub>6</sub> O<sub>2</sub> P<sub>8</sub> Pt<sub>4</sub><sup>4+</sup>,4(N<sub>1</sub> O<sub>3</sub><sup>1-</sup>)

**Compound Name:** bis((μ<sub>2</sub>-N-(4-Pyridyl)isonicotinamide-N,N')-(μ<sub>2</sub>-anthracene-1,8-diyl))-octakis(triethylphosphine)-tetra-platinum tetranitrate unknown solvate

**Space Group:** C2/c      **Cell:**      **a** 40.612(1)      **b** 14.795(0)      **c** 20.004(0)

**Space Group No.:** 15      **(Å, °)**      **α** 90.00      **β** 98.17(0)      **γ** 90.00

**R-Factor (%):** 8.23      **Temperature(K):** 150      **Density(g/cm<sup>3</sup>):** 1.521

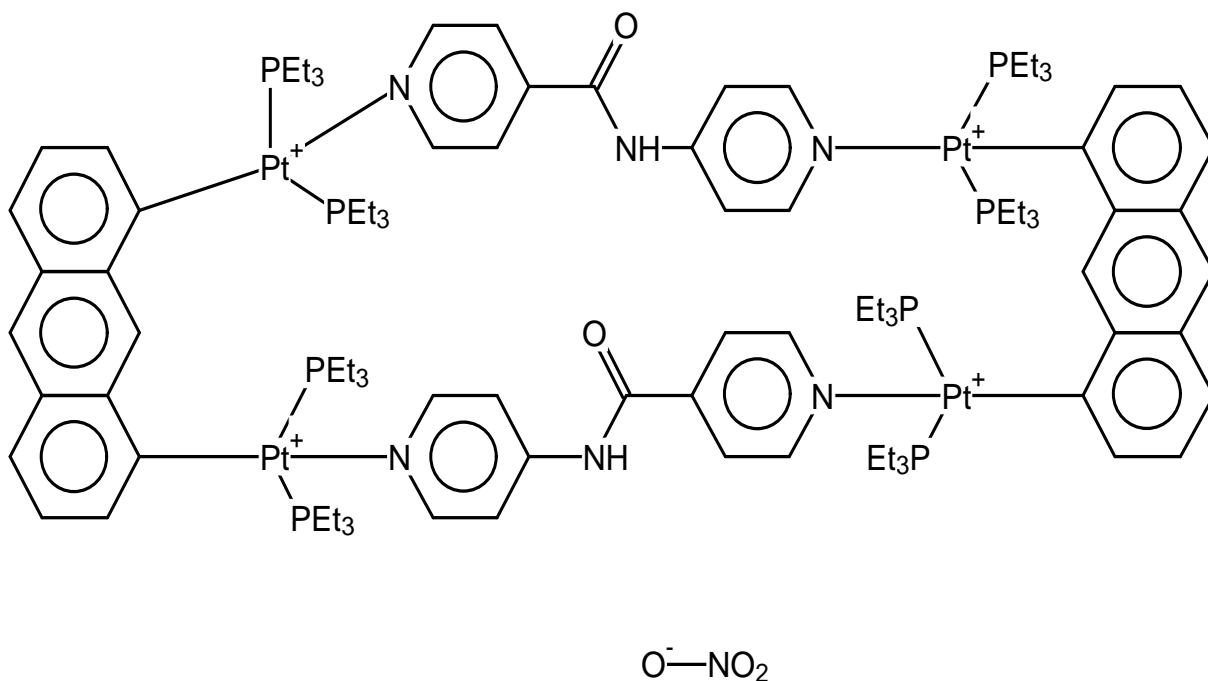

## Search: search4 (Thu May 26 10:15:51 2011): Hit 4

### MEXBEW

**Reference:** Zengquan Qin, M.C.Jennings, R.J.Puddephatt (2001)  
*Chem.Commun.* ,2676

**Formula:**  $C_{87} H_{99} N_{15} O_3 Pt_3^{6+}, 6(C_1 F_3 O_3 S_1^{-}), C_3 H_6 O_1, 3(H_2 O_1)$

**Compound Name:** tris(( $\mu_2$ -N-(4-Pyridyl)isonicotinamide-N',N'')-(4,4'-di-t-butyl-2,2'-bipyridine-N,N')-platinum(ii) trifluoromethanesulfonate clathrate pentakis(trifluoromethanesulfonate) acetone solvate trihydrate

|                         |      |                        |                    |                                   |                    |
|-------------------------|------|------------------------|--------------------|-----------------------------------|--------------------|
| <b>Space Group:</b>     | P-1  | <b>Cell:</b>           | <b>a</b> 15.240(0) | <b>b</b> 18.154(1)                | <b>c</b> 23.462(1) |
| <b>Space Group No.:</b> | 2    | (Å, °)                 | $\alpha$ 79.11(0)  | $\beta$ 84.23(0)                  | $\gamma$ 77.55(0)  |
| <b>R-Factor (%):</b>    | 9.60 | <b>Temperature(K):</b> | 200                | <b>Density(g/cm<sup>3</sup>):</b> | 1.601              |

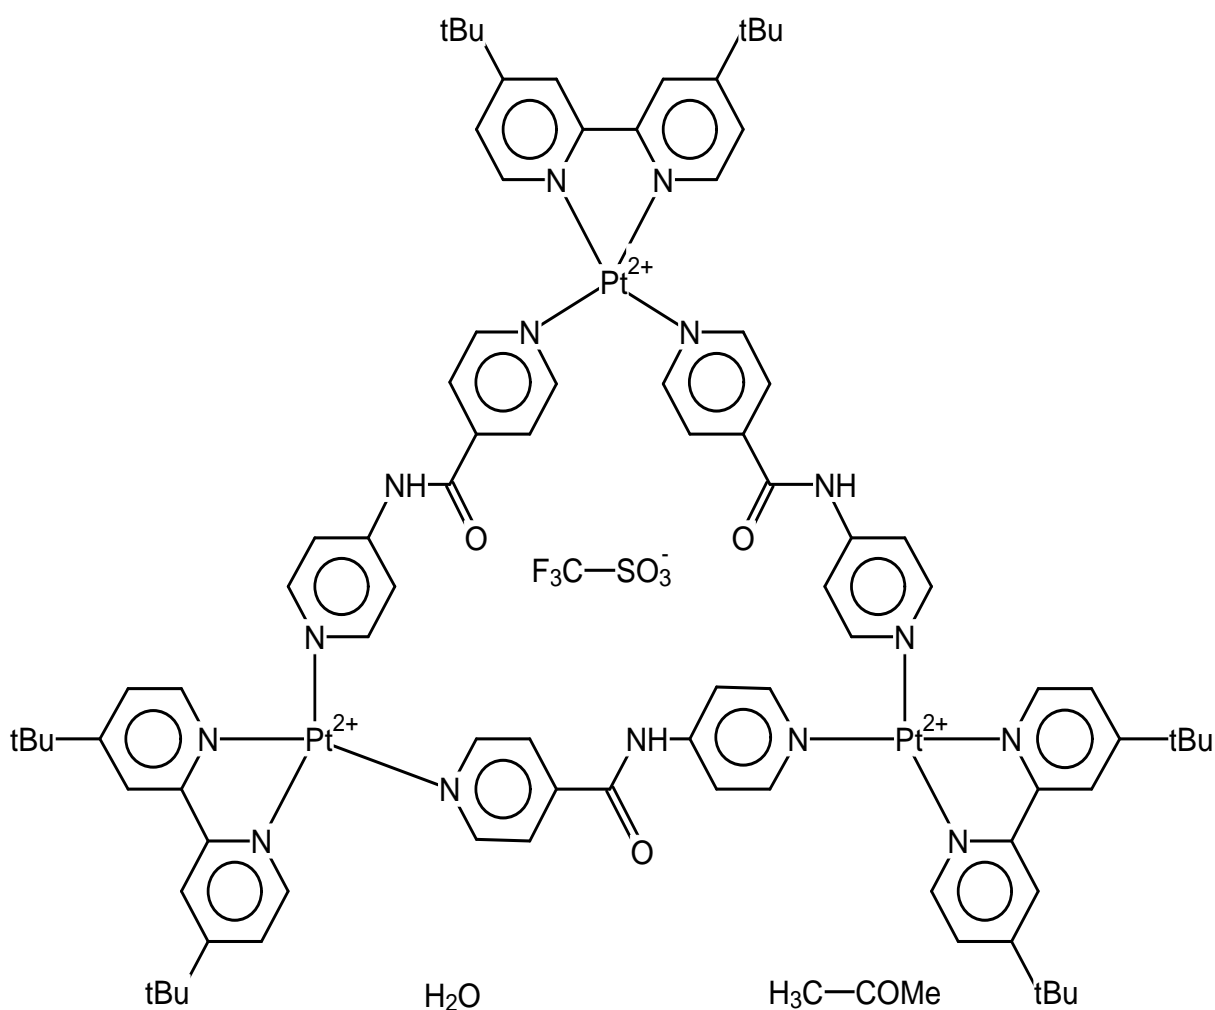

## Search: search4 (Thu May 26 10:15:51 2011): Hit 5

MEXBEW01

**Reference:** Zengquan Qin, M.C.Jennings, R.J.Puddephatt (2003)  
*Inorg.Chem.* ,**42**,1956

**Formula:**  $C_{87} H_{99} N_{15} O_3 Pt_3^{6+}, 6(C_1 F_3 O_3 S_1^{-1}), C_3 H_6 O_1, 3(H_2 O_1)$

**Compound Name:** tris(( $\mu_2$ -N-(4-Pyridyl)isonicotinamide-N',N'')-(4,4'-di-t-butyl-2,2'-bipyridine-N,N')-platinum(ii) trifluoromethanesulfonate clathrate pentakis(trifluoromethanesulfonate) acetone solvate trihydrate

|                         |      |                        |                    |                                   |                    |
|-------------------------|------|------------------------|--------------------|-----------------------------------|--------------------|
| <b>Space Group:</b>     | P-1  | <b>Cell:</b>           | <b>a</b> 15.240(0) | <b>b</b> 18.154(1)                | <b>c</b> 23.462(1) |
| <b>Space Group No.:</b> | 2    | <b>(Å, °)</b>          | $\alpha$ 79.11(0)  | $\beta$ 84.23(0)                  | $\gamma$ 77.55(0)  |
| <b>R-Factor (%):</b>    | 9.60 | <b>Temperature(K):</b> | 200                | <b>Density(g/cm<sup>3</sup>):</b> | 1.601              |

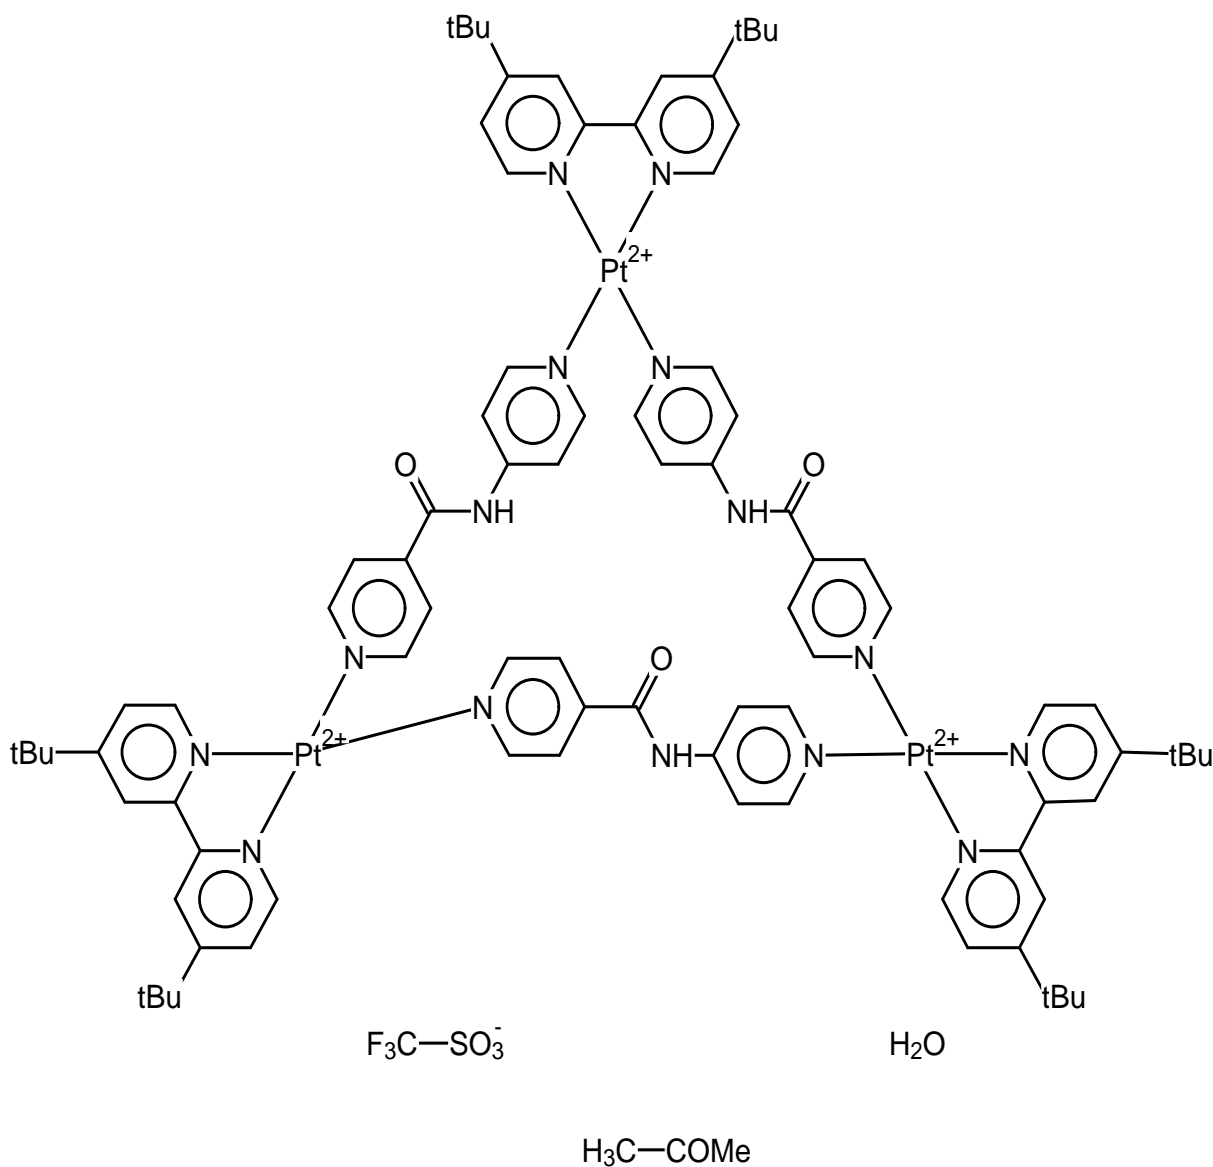

## Search: search4 (Thu May 26 10:15:51 2011): Hit 6

### OHOROT

**Reference:** T.M.Ross, S.M.Neville, D.S.Innes, D.R.Turner,  
B.Moubaraki, K.S.Murray (2010) *Dalton Trans.* ,**39**,149

**Formula:**  $(C_{27} H_{23} Fe_1 N_5 O_3^{1+})_n, n(C_{24} H_{20} B_1^{1-})_n, 2n(C_1 H_4 O_1)$

**Compound Name:** catena-(( $\mu_2$ -N-(4-pyridyl)isonicotinamide)-(N,N'-bis(salicylidene) ethylenediamine)-iron(iii) tetraphenylborate methanol solvate)

**Space Group:** P21/n      **Cell:**    **a** 13.709(1)    **b** 14.501(1)    **c** 22.956(1)  
**Space Group No.:** 14      **(Å, °)**     $\alpha$  90.00       $\beta$  96.14(0)     $\gamma$  90.00

**R-Factor (%):** 11.75      **Temperature(K):** 123      **Density(g/cm<sup>3</sup>):** 1.324

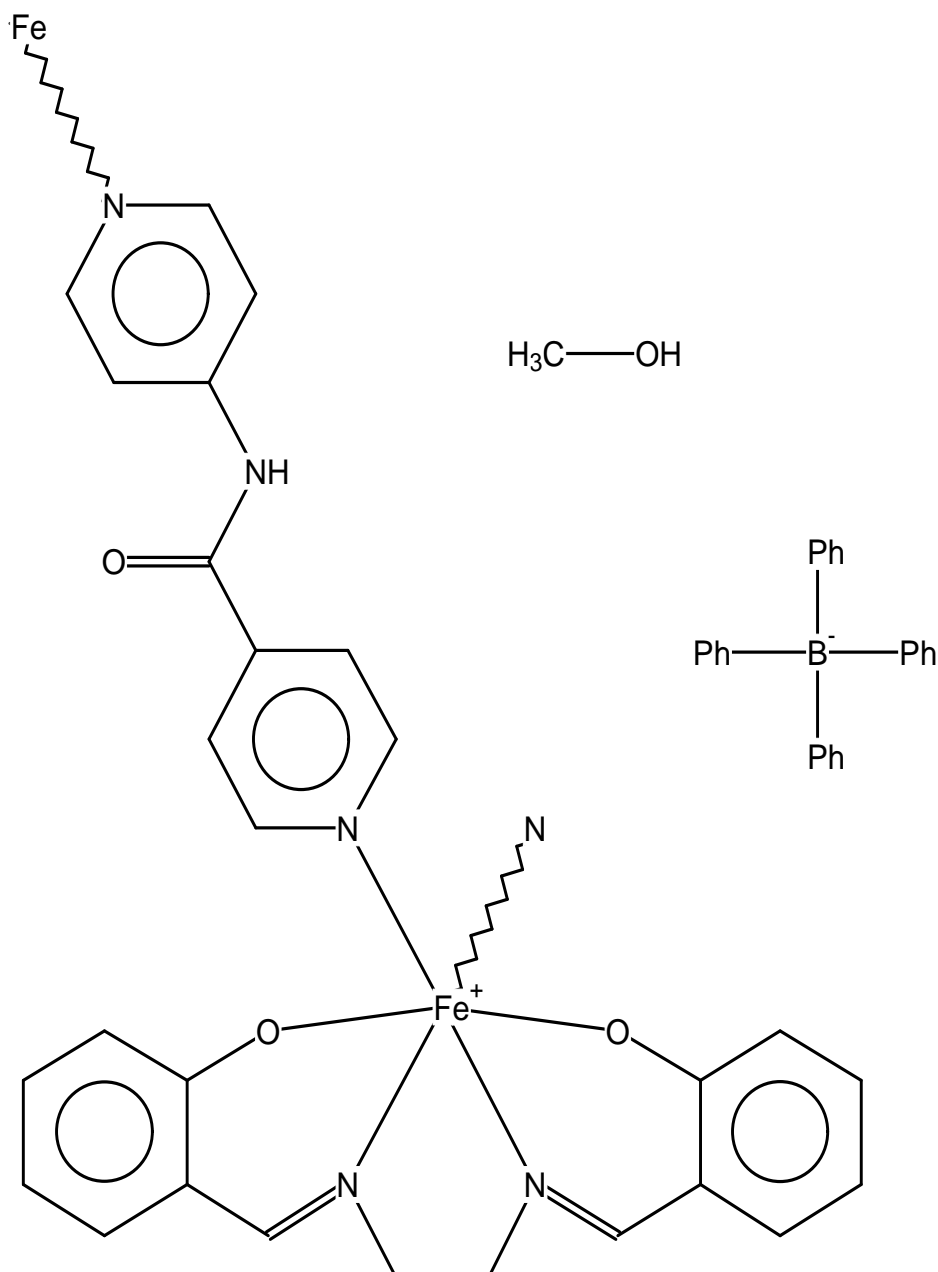

## Search: search4 (Thu May 26 10:15:51 2011): Hit 7

PAQLAV

**Reference:** D.K.Kumar, A.Ballabh, D.A.Jose, P.Dastidar, A.Das  
(2005) *Cryst.Growth Des.* ,5,651

**Formula:**  $C_{11} H_{11} N_3 O_1^{2+}, Cl_4 Cu_1^{2-}$

**Compound Name:** N-(4-Pyridinio)isonicotinamidinium tetrachloro-copper

**Space Group:** P-1      **Cell:**    **a** 7.341(2)    **b** 7.401(7)    **c** 14.620(7)  
**Space Group No.:** 2      **(Å, °)**     $\alpha$  104.60(5)     $\beta$  98.24(3)     $\gamma$  90.69(5)

**R-Factor (%):** 5.51      **Temperature(K):** 293      **Density(g/cm<sup>3</sup>):** 1.777

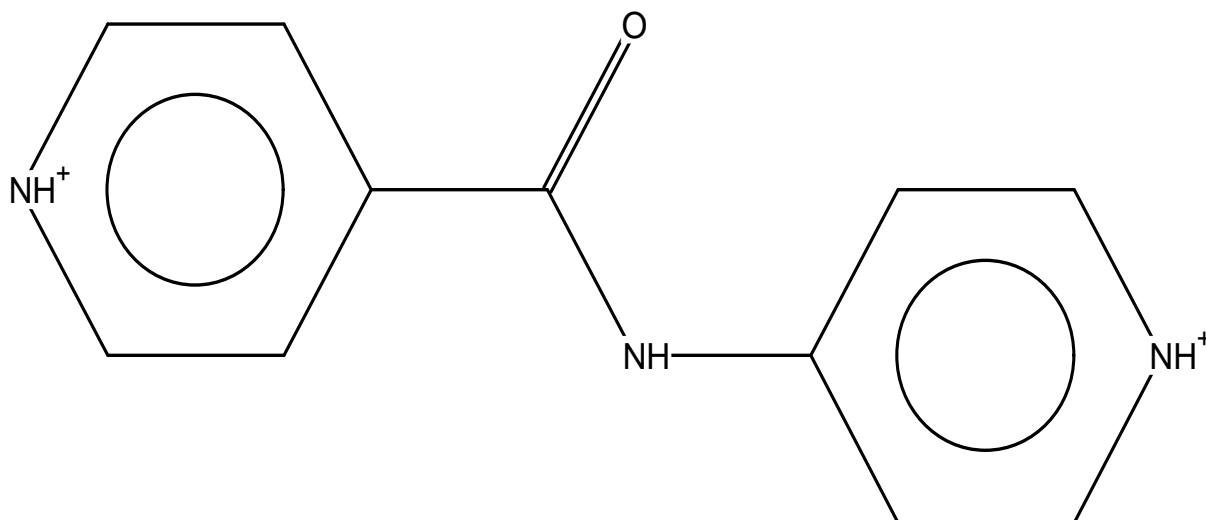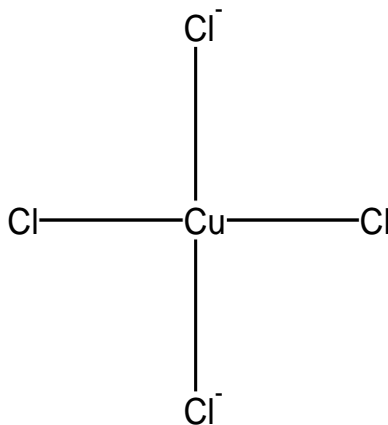



## Search: search4 (Thu May 26 10:15:51 2011): Hit 8

PAQLAV01

**Reference:** D.K.Kumar, A.Ballabh, D.A.Jose, P.Dastidar, A.Das  
(2005) *Cryst.Growth Des.* ,5,651

**Formula:** C<sub>11</sub> H<sub>11</sub> N<sub>3</sub> O<sub>1</sub><sup>2+</sup>, Cl<sub>4</sub> Cu<sub>1</sub><sup>2-</sup>

**Compound Name:** N-(4-Pyridinio)isonicotinamidinium tetrachloro-copper

**Space Group:** P-1      **Cell:**    **a** 7.242(1)    **b** 7.400(1)    **c** 14.848(2)  
**Space Group No.:** 2      **(Å, °)**    **α** 77.77(0)    **β** 76.10(0)    **γ** 83.13(0)

**R-Factor (%):** 5.56      **Temperature(K):** 273      **Density(g/cm<sup>3</sup>):** 1.793

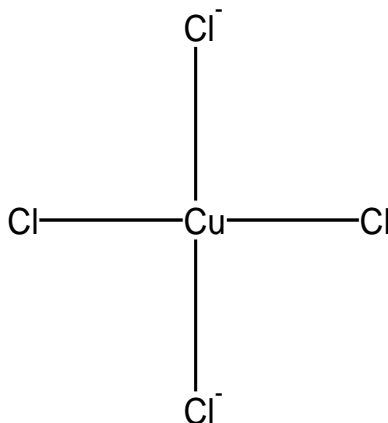

## Search: search4 (Thu May 26 10:15:51 2011): Hit 9

POJYUJ

**Reference:** K.Uemura, Y.Kumamoto, S.Kitagawa (2008)  
*Chem.-Eur.J.* ,**14**,9565

**Formula:** (C<sub>11</sub> H<sub>9</sub> Ag<sub>1</sub> N<sub>3</sub> O<sub>1</sub> 1<sup>+</sup>)<sub>n</sub>,n(F<sub>6</sub> P<sub>1</sub> 1<sup>-</sup>)

**Compound Name:** catena-((μ<sub>2</sub>-N-(Pyridin-4-yl)pyridine-4-carboxamide-N,N')-silver(i) hexafluorophosphate)

**Synonym:** catena-((μ<sub>2</sub>-N-(Pyridin-4-yl)isonicotinamide-N,N')-silver(i) hexafluorophosphate)

**Space Group:** C2/c      **Cell:**      **a** 20.222(8)      **b** 8.652(3)      **c** 16.482(6)  
**Space Group No.:** 15      **(Å, °)**      **α** 90.00      **β** 92.28(0)      **γ** 90.00

**R-Factor (%):** 7.03      **Temperature(K):** 293      **Density(g/cm<sup>3</sup>):** 2.084

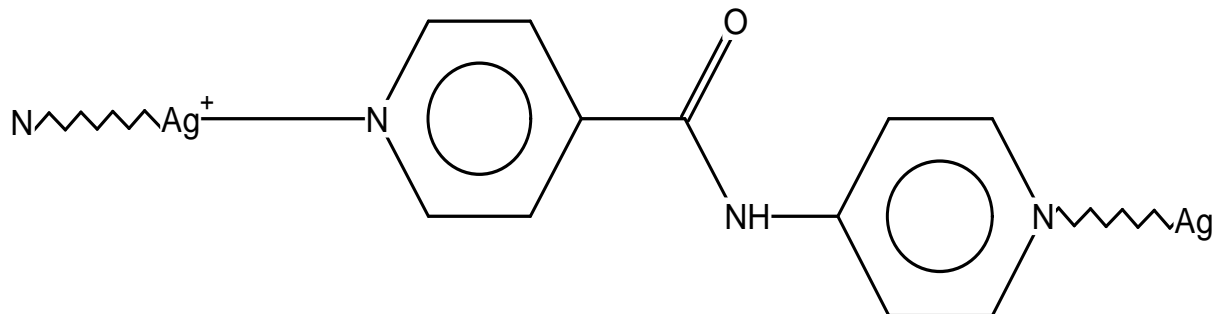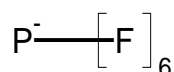

## Search: search4 (Thu May 26 10:15:51 2011): Hit 10

POJZAQ

**Reference:** K.Uemura, Y.Kumamoto, S.Kitagawa (2008)  
*Chem.-Eur.J.* ,**14**,9565

**Formula:** (C<sub>11</sub> H<sub>9</sub> Ag<sub>1</sub> N<sub>3</sub> O<sub>1</sub><sup>1+</sup>)<sub>n</sub>,n(Cl<sub>1</sub> O<sub>4</sub><sup>1-</sup>)

**Compound Name:** catena-((μ<sub>2</sub>-N-(Pyridin-4-yl)pyridine-4-carboxamide-N,N')-silver(i) perchlorate)

**Synonym:** catena-((μ<sub>2</sub>-N-(Pyridin-4-yl)isonicotinamide-N,N')-silver(i) perchlorate)

**Space Group:** C2/c      **Cell:**    **a** 19.760(10)    **b** 8.112(3)    **c** 16.797(8)  
**Space Group No.:** 15      **(Å, °)**    **α** 90.00      **β** 93.52(0)    **γ** 90.00

**R-Factor (%):** 10.37      **Temperature(K):** 293      **Density(g/cm<sup>3</sup>):** 2.010

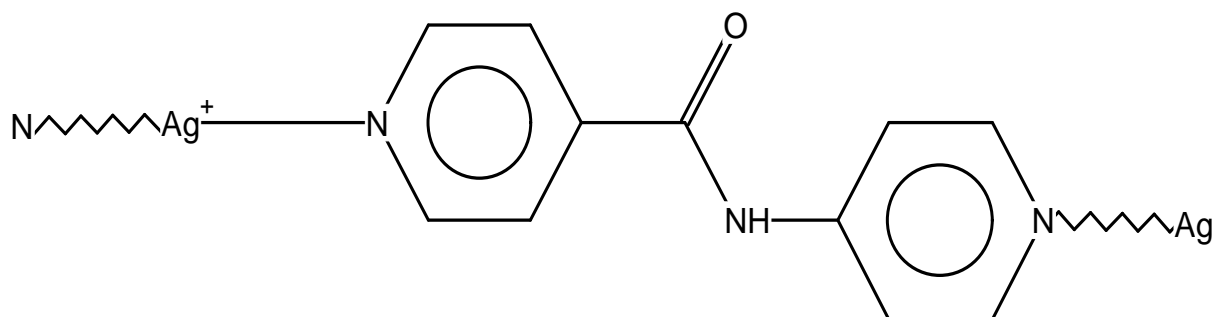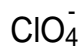

## Search: search4 (Thu May 26 10:15:51 2011): Hit 11

POJZEU

**Reference:** K.Uemura, Y.Kumamoto, S.Kitagawa (2008)  
*Chem.-Eur.J.* ,**14**,9565

**Formula:** (C<sub>11</sub> H<sub>9</sub> Ag<sub>1</sub> N<sub>3</sub> O<sub>1</sub><sup>1+</sup>)<sub>n</sub>,n(B<sub>1</sub> F<sub>4</sub><sup>1-</sup>)

**Compound Name:** catena-((μ<sub>2</sub>-N-(Pyridin-4-yl)pyridine-4-carboxamide-N,N')-silver(i) tetrafluoroborate)

**Synonym:** catena-((μ<sub>2</sub>-N-(Pyridin-4-yl)isonicotinamide-N,N')-silver(i) tetrafluoroborate)

**Space Group:** C2/c      **Cell:**      **a** 19.670(8)      **b** 7.908(3)      **c** 16.980(7)

**Space Group No.:** 15      **(Å, °)**      **α** 90.00      **β** 92.94(0)      **γ** 90.00

**R-Factor (%):** 4.99      **Temperature(K):** 293      **Density(g/cm<sup>3</sup>):** 1.984

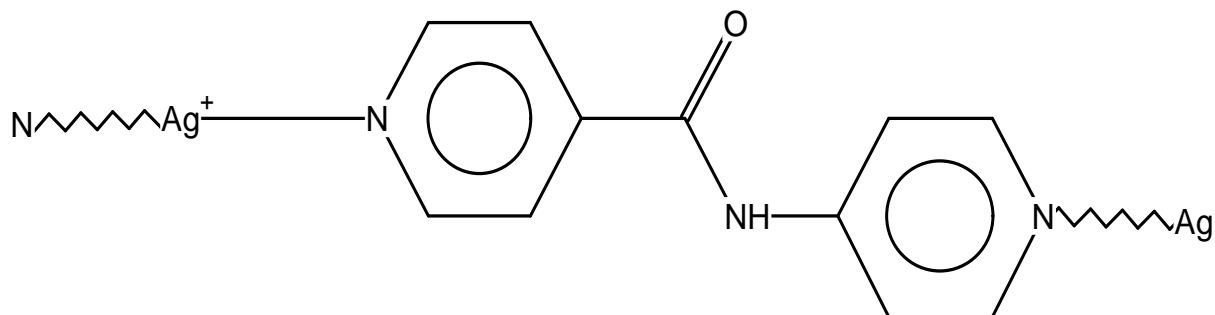

BF<sub>4</sub><sup>-</sup>

## Search: search4 (Thu May 26 10:15:51 2011): Hit 12

POJZIY

**Reference:** K.Uemura, Y.Kumamoto, S.Kitagawa (2008)  
*Chem.-Eur.J.* ,**14**,9565

**Formula:** (C<sub>11</sub> H<sub>9</sub> Ag<sub>1</sub> N<sub>3</sub> O<sub>1</sub><sup>1+</sup>)<sub>n</sub>,n(N<sub>1</sub> O<sub>3</sub><sup>1-</sup>)

**Compound Name:** catena-((μ<sub>2</sub>-N-(Pyridin-4-yl)pyridine-4-carboxamide-N,N')-silver(i) nitrate)

**Synonym:** catena-((μ<sub>2</sub>-N-(Pyridin-4-yl)isonicotinamide-N,N')-silver(i) nitrate)

**Space Group:** C2/c      **Cell:**      **a** 19.670(10)      **b** 6.728(4)      **c** 18.670(10)

**Space Group No.:** 15      **(Å, °)**      **α** 90.00      **β** 91.66(0)      **γ** 90.00

**R-Factor (%):** 4.39      **Temperature(K):** 293      **Density(g/cm<sup>3</sup>):** 1.985

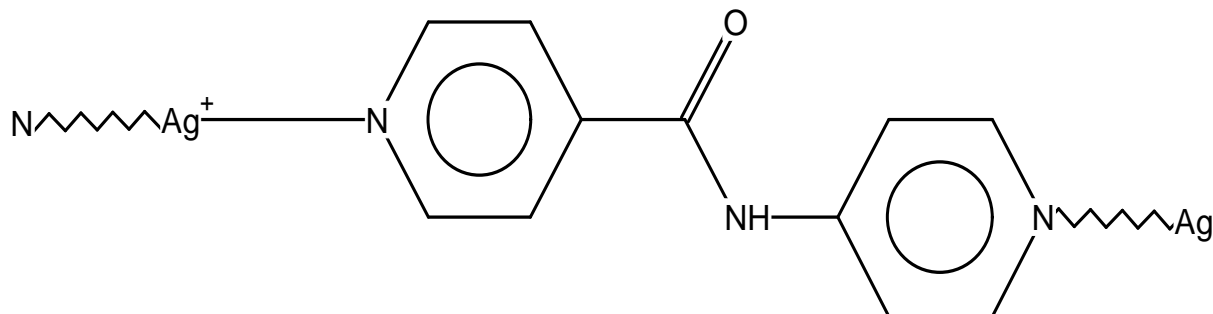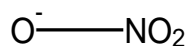

## Search: search4 (Thu May 26 10:15:51 2011): Hit 13

### VIMZOH

**Reference:** D.K.Kumar, A.Das, P.Dastidar (2007) *Inorg.Chem.* ,**46**, 7351

**Formula:** C<sub>99</sub> H<sub>65</sub> N<sub>11</sub> O<sub>1</sub> Zn<sub>2</sub>,4(C<sub>7</sub> H<sub>8</sub>)

**Compound Name:** (μ<sub>2</sub>-N-(4-Pyridyl)isonicotinamide)-bis(5,10,15,20-tetraphenylporphyrinato)-di-zinc(ii) bis(toluene) clathrate toluene solvate

|                         |      |                        |                    |                                   |                    |
|-------------------------|------|------------------------|--------------------|-----------------------------------|--------------------|
| <b>Space Group:</b>     | P-1  | <b>Cell:</b>           | <b>a</b> 11.170(3) | <b>b</b> 11.284(3)                | <b>c</b> 22.556(6) |
| <b>Space Group No.:</b> | 2    | <b>(Å, °)</b>          | <b>α</b> 80.64(0)  | <b>β</b> 86.85(0)                 | <b>γ</b> 73.52(0)  |
| <b>R-Factor (%):</b>    | 8.19 | <b>Temperature(K):</b> | 100                | <b>Density(g/cm<sup>3</sup>):</b> | 1.188              |

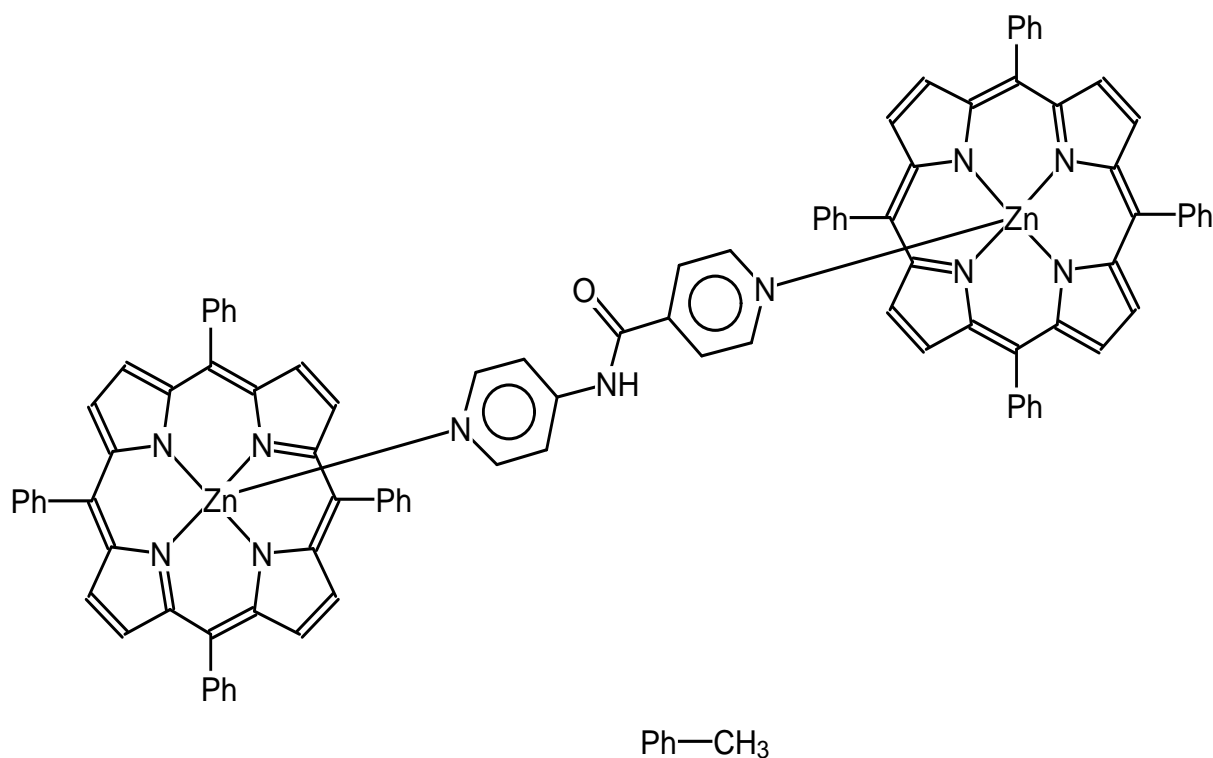

## Search: search4 (Thu May 26 10:15:51 2011): Hit 14

### VIMZUN

**Reference:** D.K.Kumar, A.Das, P.Dastidar (2007) *Inorg.Chem.* ,**46**, 7351

**Formula:** C<sub>55</sub> H<sub>37</sub> N<sub>7</sub> O<sub>1</sub> Zn<sub>1</sub>, C<sub>8</sub> H<sub>10</sub>, C<sub>9</sub> H<sub>10</sub> O<sub>1</sub>

**Compound Name:** (N-(4-Pyridyl)isonicotinamide)-(5,10,15,20-tetraphenylporphyrinato)-zinc(ii) p-xylene 2-(p-tolyl)ethenol clathrate

**Space Group:** P21/c      **Cell:**      **a** 11.682(2)      **b** 23.694(5)      **c** 22.016(4)  
**Space Group No.:** 14      **(Å, °)**       $\alpha$  90.00       $\beta$  104.75(0)       $\gamma$  90.00

**R-Factor (%):** 5.79      **Temperature(K):** 150      **Density(g/cm<sup>3</sup>):** 1.260

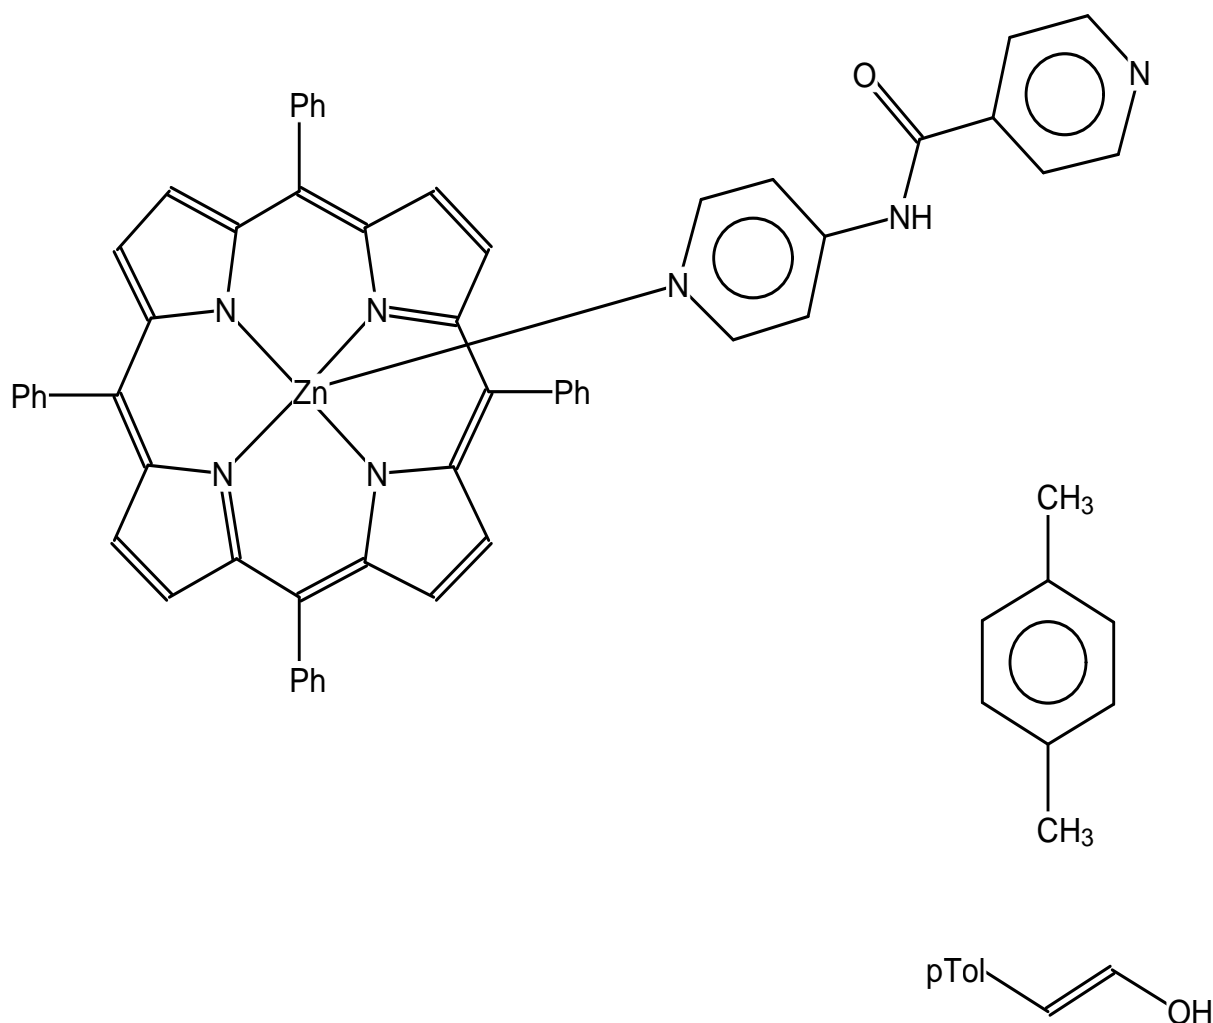

## Search: search4 (Thu May 26 10:15:51 2011): Hit 15

### VIPTUK

**Reference:** D.K.Kumar, A.Das, P.Dastidar (2007) *CrystEngComm*, **9**, 895

**Formula:**  $(C_{11}H_{17}Co_1N_3O_5^{2+})_n, n(C_8H_4O_4^{2-})_n, 3n(H_2O)_1$

**Compound Name:** catena-(( $\mu_2$ -N-(4-Pyridyl)isonicotinamide)-tetraqua-cobalt(ii) terephthalate trihydrate)

**Space Group:** P21/c      **Cell:**      **a** 14.887(1)      **b** 11.860(1)      **c** 13.946(1)  
**Space Group No.:** 14      **(Å, °)**       $\alpha$  90.00       $\beta$  115.34(0)       $\gamma$  90.00

**R-Factor (%):** 4.51      **Temperature(K):** 100      **Density(g/cm<sup>3</sup>):** 1.637

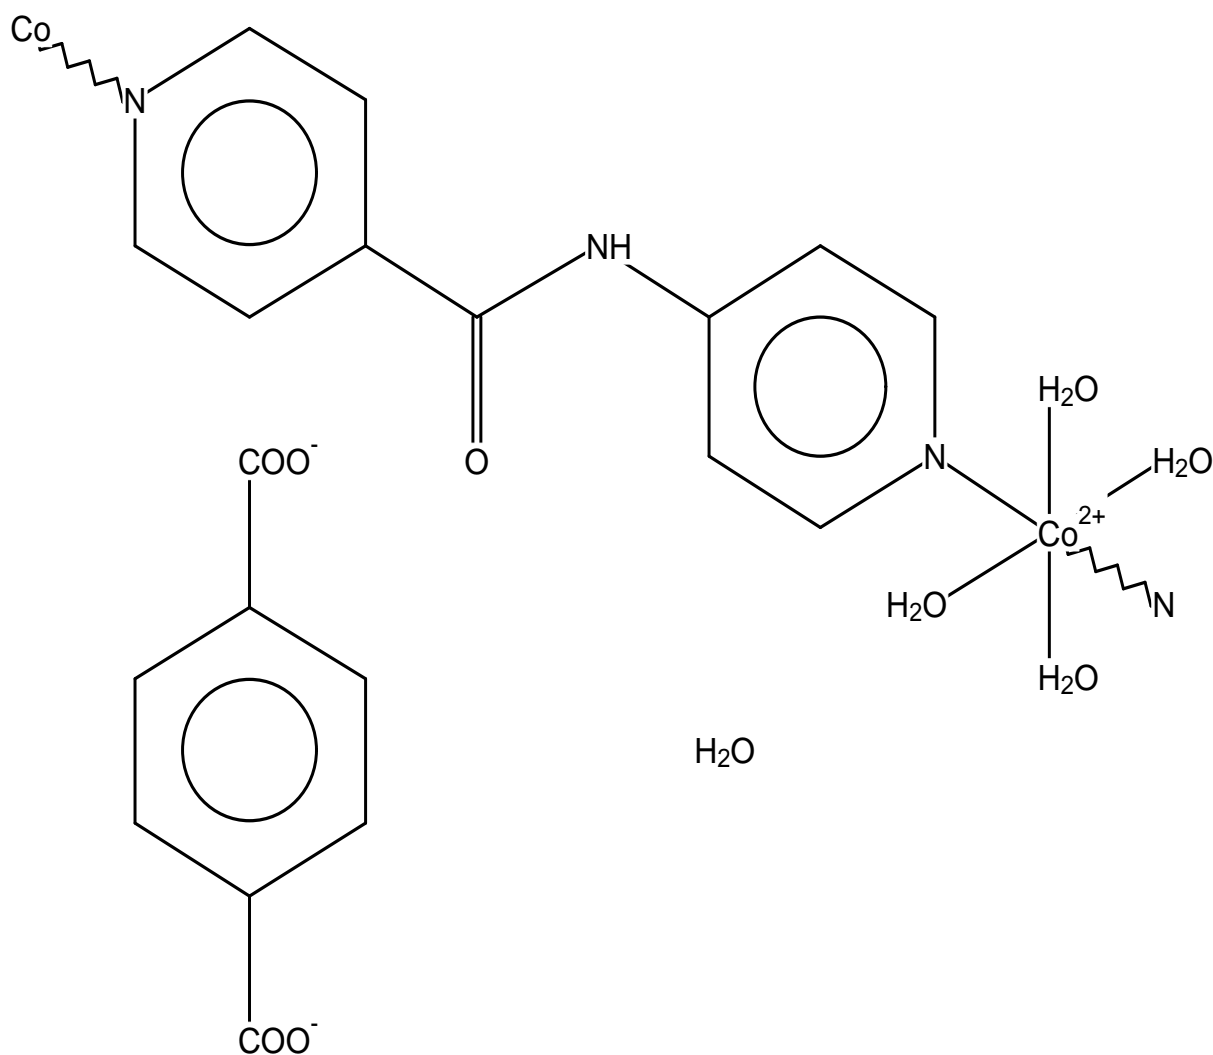



## Search: search4 (Thu May 26 10:15:51 2011): Hit 16

### VIPVAS

**Reference:** D.K.Kumar, A.Das, P.Dastidar (2007) *CrystEngComm* ,9, 895

**Formula:**  $(C_{22} H_{30} Co_2 N_6 O_{10}^{4+})_n, 2n(C_8 H_4 O_4^{2-}), 10n(H_2 O_1)$

**Compound Name:** catena-(bis( $\mu_2$ -N-(4-Pyridyl)isonicotinamide)-octaaqua-di-cobalt(ii) bis(terephthalate) decahydrate)

**Space Group:** P-1      **Cell:**    **a** 14.228(2)    **b** 14.831(3)    **c** 14.954(3)  
**Space Group No.:** 2      (**Å, °**)     $\alpha$  61.24(0)     $\beta$  79.34(0)     $\gamma$  66.12(0)

**R-Factor (%):** 9.13      **Temperature(K):** 298      **Density(g/cm<sup>3</sup>):** 1.529

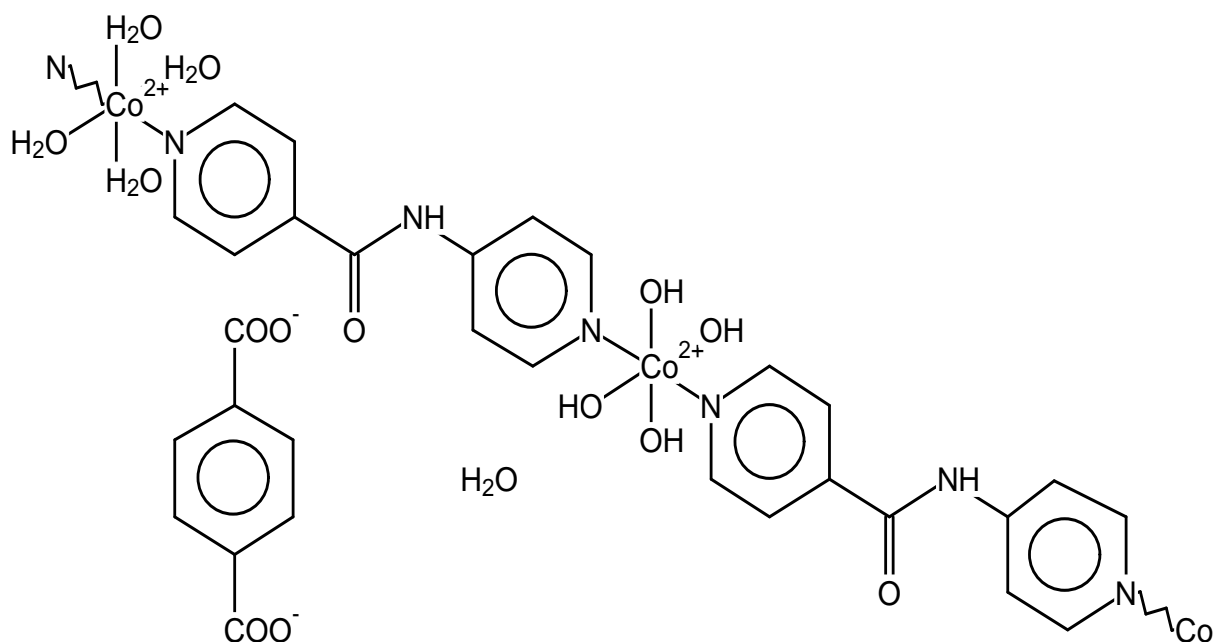

## Search: search4 (Thu May 26 10:15:51 2011): Hit 17

YEPDIH

**Reference:** D.K.Kumar, A.Das, P.Dastidar (2006) *Cryst.Growth Des.* ,  
6,1903

**Formula:** (C<sub>15</sub> H<sub>13</sub> N<sub>3</sub> O<sub>6</sub> Zn<sub>1</sub>)<sub>n</sub>

**Compound Name:** catena-((μ<sub>2</sub>-Maleato-O,O',O'')-(μ<sub>2</sub>-N-(4-pyridyl)isonicotinamide-N,N')-  
aqua-zinc(ii))

**Space Group:** P21/c      **Cell:**      **a** 9.194(0)      **b** 8.804(0)      **c** 19.555(2)  
**Space Group No.:** 14      **(Å, °)**      **α** 90.00      **β** 91.11(0)      **γ** 90.00

**R-Factor (%):** 2.65      **Temperature(K):** 100      **Density(g/cm<sup>3</sup>):** 1.665

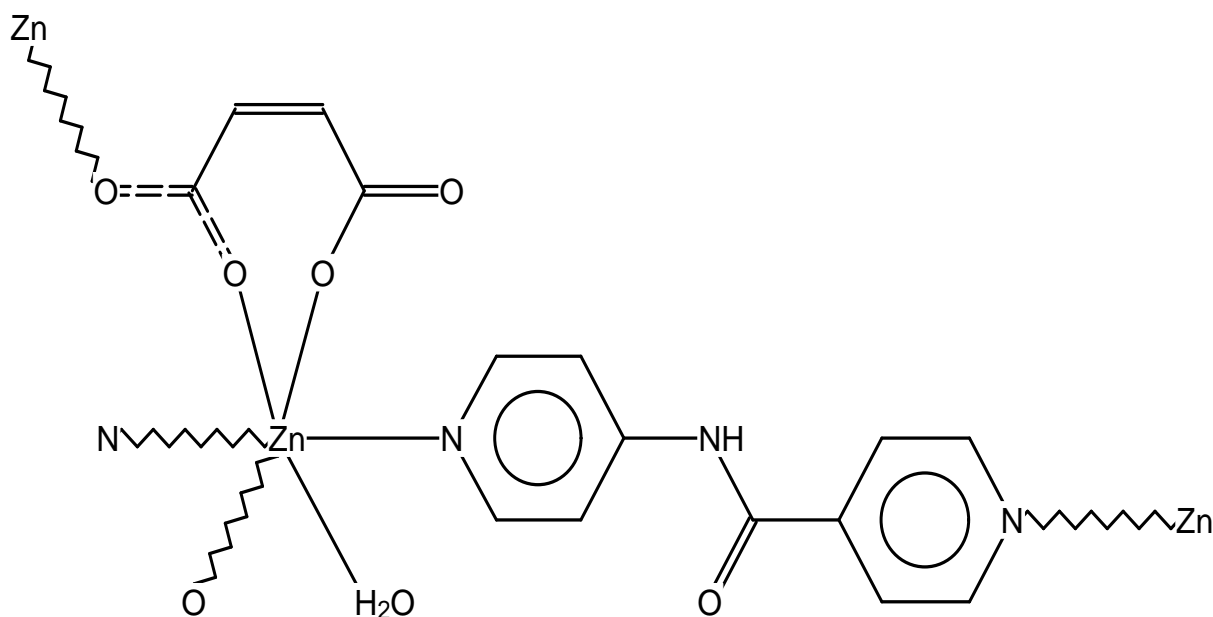

## Search: search4 (Thu May 26 10:15:51 2011): Hit 18

### YEPFOP

**Reference:** D.K.Kumar, A.Das, P.Dastidar (2006) *Cryst.Growth Des.* ,  
6,1903

**Formula:** (C<sub>15</sub> H<sub>13</sub> Co<sub>1</sub> N<sub>3</sub> O<sub>6</sub>)<sub>n</sub>

**Compound Name:** catena-((μ<sub>2</sub>-Maleato-O,O',O'')-(μ<sub>2</sub>-N-(4-pyridyl)isonicotinamide-N,N')-  
aqua-cobalt(ii))

**Space Group:** P21/c      **Cell:**      **a** 9.179(0)      **b** 8.730(0)      **c** 19.481(1)  
**Space Group No.:** 14      **(Å, °)**      **α** 90.00      **β** 91.31(0)      **γ** 90.00

**R-Factor (%):** 4.75      **Temperature(K):** 100      **Density(g/cm<sup>3</sup>):** 1.661

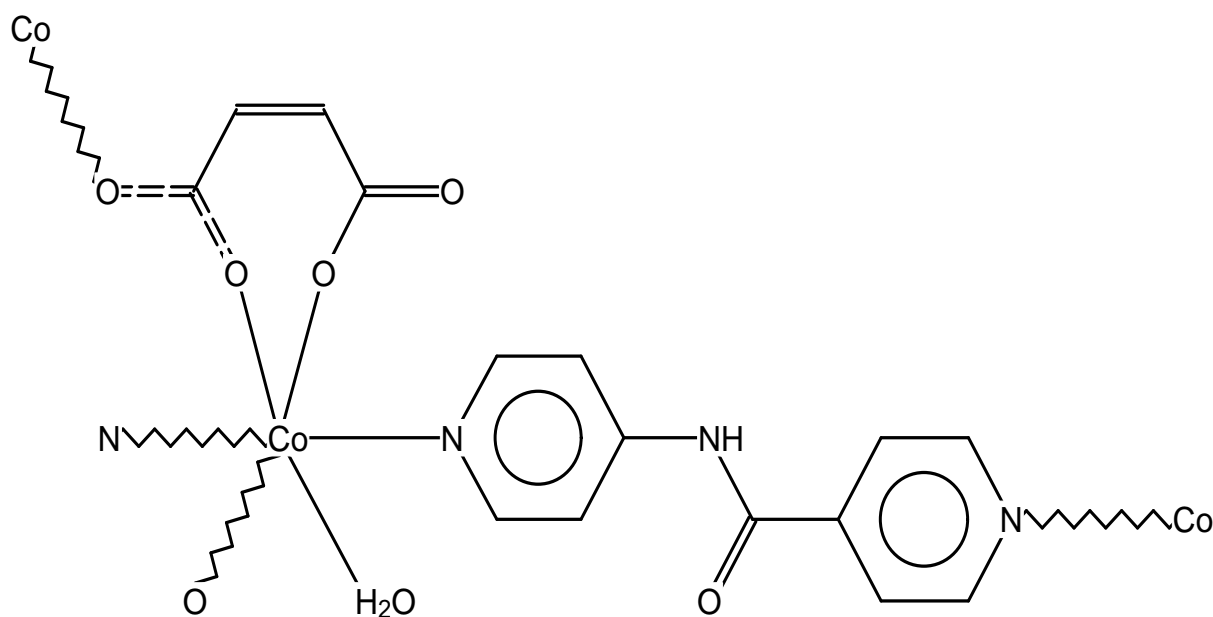

## Search Overview

**Search:** search5  
**Date/Time done:** Thu May 26 10:17:05 2011  
**Database(s):** CSD version 5.32 (November 2010)  
CSD version 5.32 updates (Nov 2010)  
**Restriction Info:** No refcode restrictions applied  
**Filters:** None  
**Percentage Completed:** 100%  
**Number of Hits:** 13

*Summary of queries used. Search found structures that:*

match

**Query 1**

**Query 2**

**Query 1**

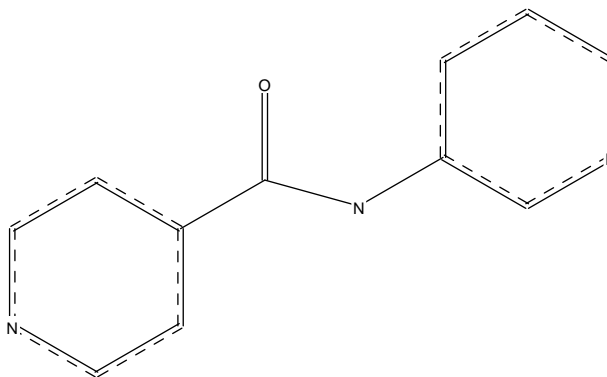

**Query 2**

4M

## Search: search5 (Thu May 26 10:17:05 2011): Hit 1

### DEPSUN

**Reference:** D.K.Kumar, A.Das, P.Dastidar (2006) *J.Mol.Struct.* ,**796**, 139

**Formula:**  $(C_{38} H_{38} Co_2 N_6 O_{16})_n \cdot 2n(H_2 O)_1$

**Compound Name:** catena-(bis( $\mu_2$ -N-(3-pyridyl)isonicotinamide)-bis(phthalato)-hexaaqua-di-cobalt(ii) dihydrate)

**Space Group:** P21/n      **Cell:**      **a** 10.665(0)      **b** 7.995(0)      **c** 24.744(1)  
**Space Group No.:** 14      (**Å, °**)       $\alpha$  90.00       $\beta$  102.38(0)       $\gamma$  90.00

**R-Factor (%):** 3.35      **Temperature(K):** 100      **Density(g/cm<sup>3</sup>):** 1.593

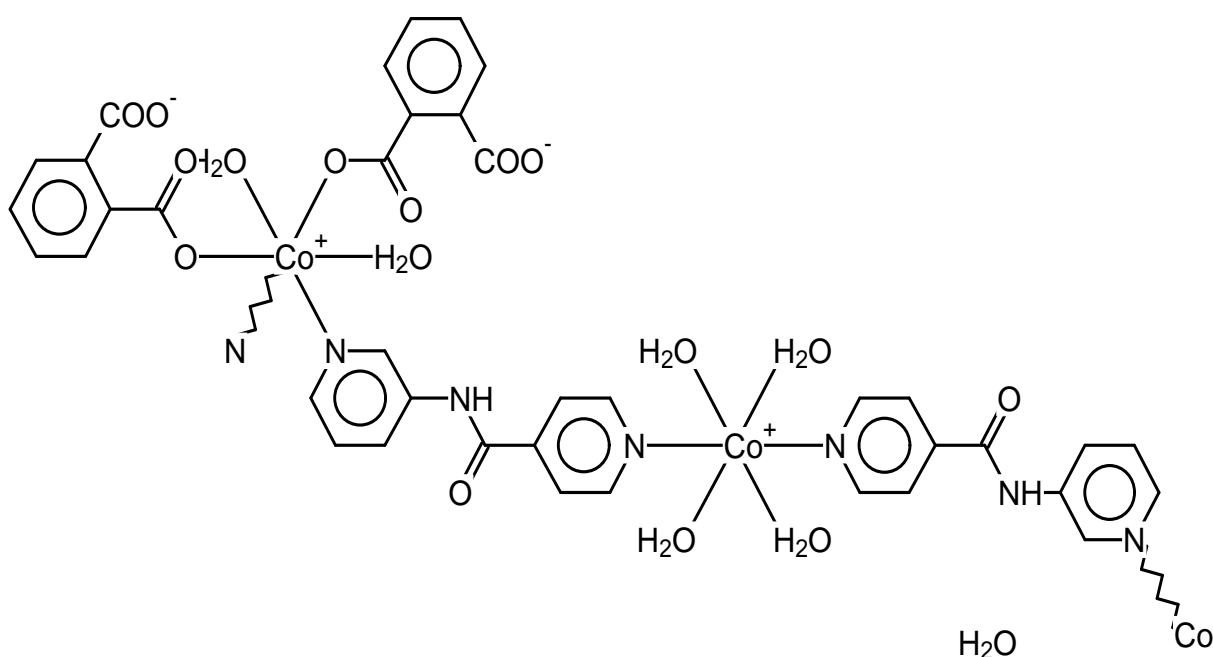

## Search: search5 (Thu May 26 10:17:05 2011): Hit 2

KAZVIR

**Reference:** D.K.Kumar, A.Das, P.Dastidar (2006) *Cryst.Growth Des.* ,  
6,216

**Formula:** C<sub>11</sub> H<sub>11</sub> N<sub>3</sub> O<sub>1</sub> 2<sup>+</sup>, Cl<sub>4</sub> Pt<sub>1</sub> 2<sup>-</sup>

**Compound Name:** N-(3-Pyridinio)isonicotinamidinium tetrachloro-platinum(ii)

**Space Group:** P21/n      **Cell:**      **a** 10.624(0)      **b** 11.190(0)      **c** 12.922(1)  
**Space Group No.:** 14      **(Å, °)**      **α** 90.00      **β** 97.60(0)      **γ** 90.00

**R-Factor (%):** 2.59      **Temperature(K):** 298      **Density(g/cm<sup>3</sup>):** 2.347

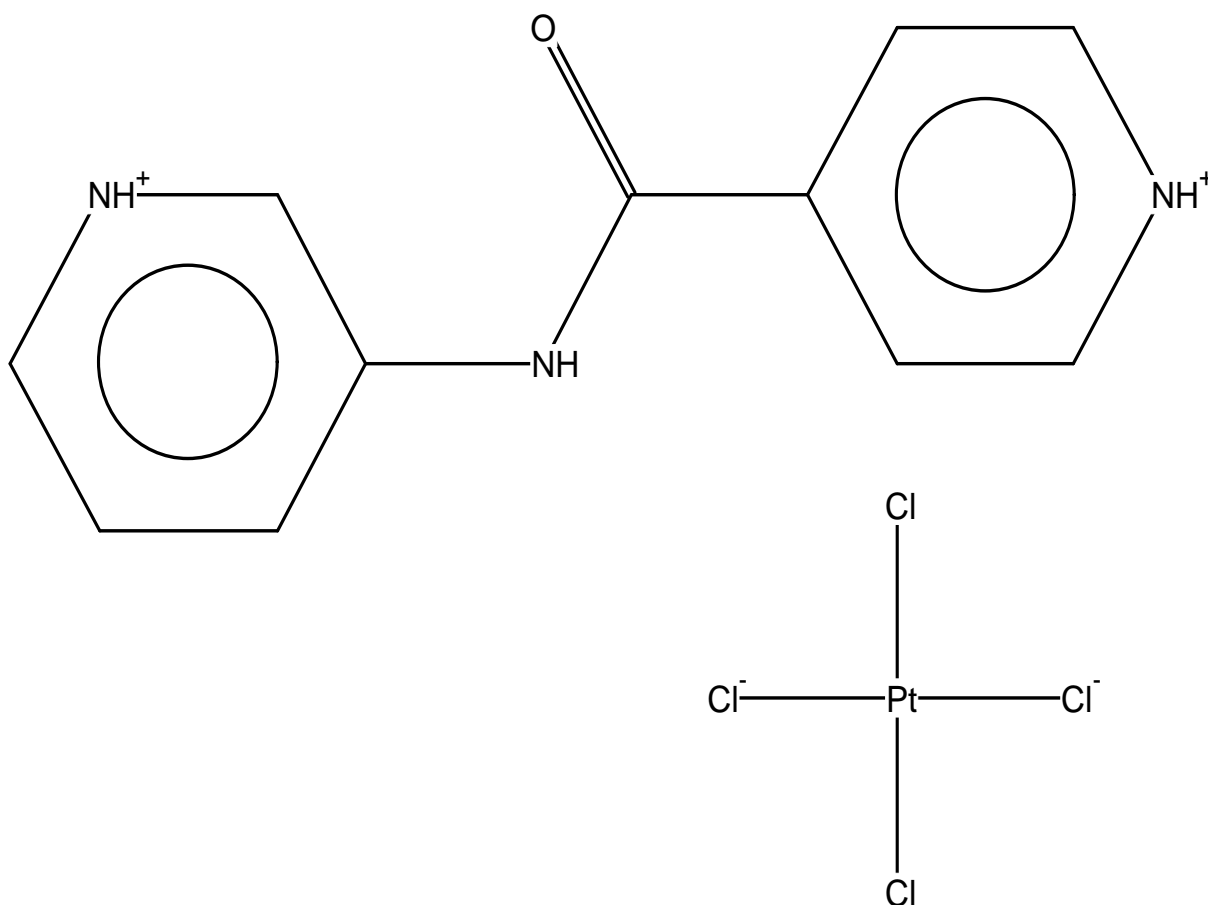

## Search: search5 (Thu May 26 10:17:05 2011): Hit 3

### KAZVOX

**Reference:** D.K.Kumar, A.Das, P.Dastidar (2006) *Cryst.Growth Des.* ,  
6,216

**Formula:** C<sub>11</sub> H<sub>11</sub> N<sub>3</sub> O<sub>1</sub> 2<sup>+</sup>, Cl<sub>4</sub> Pd<sub>1</sub> 2<sup>-</sup>

**Compound Name:** N-(3-Pyridinio)isonicotinamidinium tetrachloro-palladium(ii)

**Space Group:** C2/c      **Cell:**    **a** 24.166(1)    **b** 7.974(0)    **c** 15.287(1)

**Space Group No.:** 15      **(Å, °)**    **α** 90.00      **β** 92.70(0)    **γ** 90.00

**R-Factor (%):** 3.39      **Temperature(K):** 100      **Density(g/cm<sup>3</sup>):** 2.029

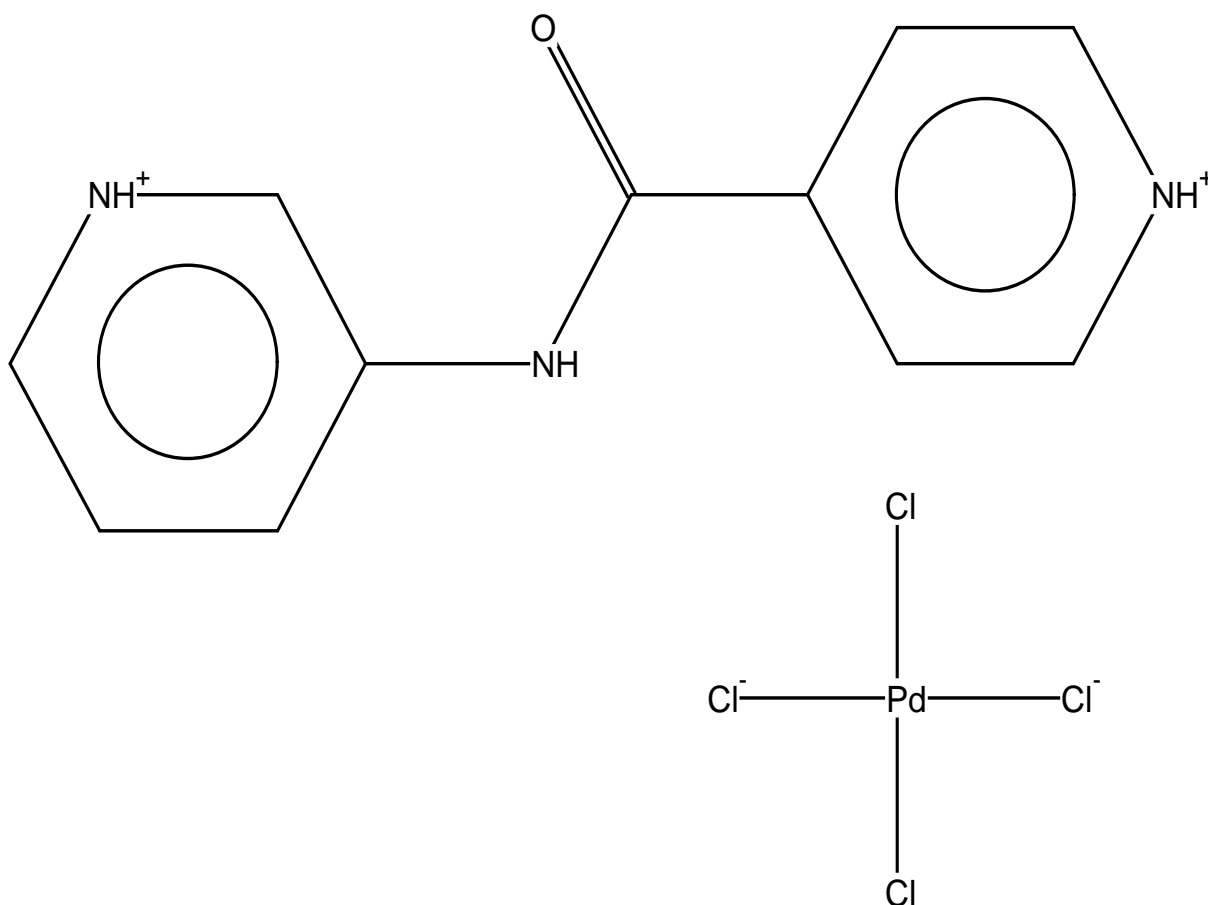

## Search: search5 (Thu May 26 10:17:05 2011): Hit 4

### MOVPAO

**Reference:** K.Uemura, S.Kitagawa, M.Kondo, K.Fukui, R.Kitaura,  
Ho-Chol Chang, T.Mizutani (2002) *Chem.-Eur.J.* ,**8**,3586

**Formula:** (C<sub>24</sub> H<sub>18</sub> Co<sub>1</sub> N<sub>8</sub> O<sub>2</sub> S<sub>2</sub>)<sub>n</sub>,2n(C<sub>2</sub> H<sub>6</sub> O<sub>1</sub>),11n(H<sub>2</sub> O<sub>1</sub>)

**Compound Name:** catena-(bis(μ<sub>2</sub>-N-(3-Pyridyl)isonicotinamide)-bis(isothiocyanato)-cobalt ethanol solvate undecahydrate)

**Space Group:** C2/c      **Cell:**      **a** 19.730(3)      **b** 18.329(0)      **c** 14.988(0)  
**Space Group No.:** 15      **(Å, °)**      α 90.00      β 115.21(0)      γ 90.00

**R-Factor (%):** 8.10      **Temperature(K):** 293      **Density(g/cm<sup>3</sup>):** 1.170

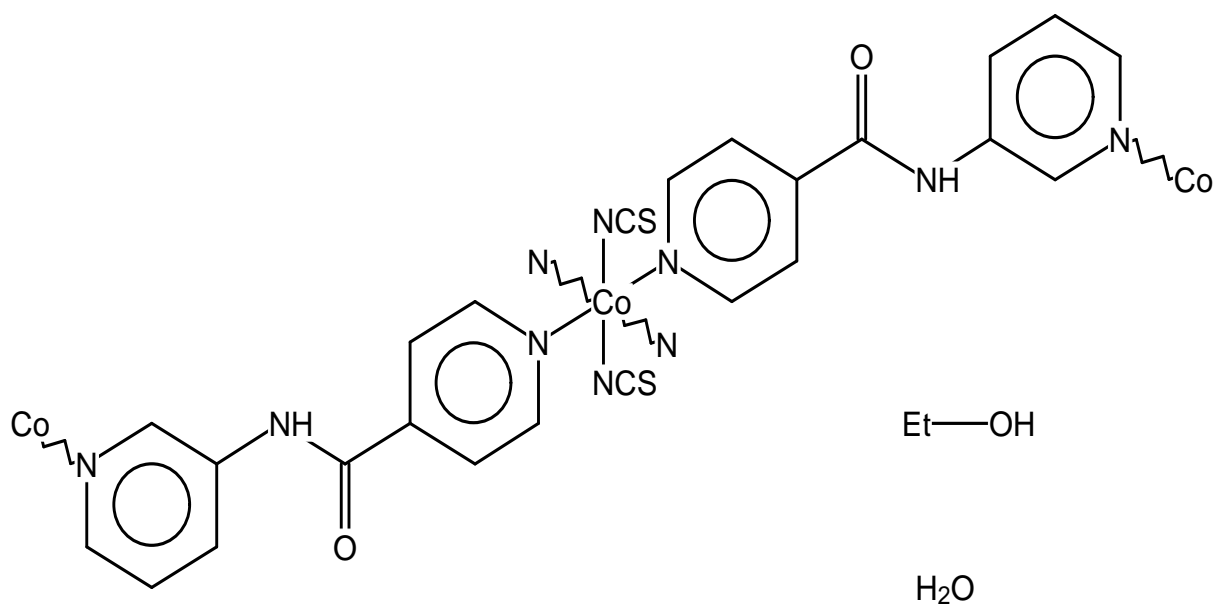



## Search: search5 (Thu May 26 10:17:05 2011): Hit 5

### MOVPEs

**Reference:** K.Uemura, S.Kitagawa, M.Kondo, K.Fukui, R.Kitaura,  
Ho-Chol Chang, T.Mizutani (2002) *Chem.-Eur.J.* ,**8**,3586

**Formula:** C<sub>24</sub> H<sub>22</sub> Co<sub>1</sub> N<sub>8</sub> O<sub>4</sub> S<sub>2</sub>

**Compound Name:** Diaqua-bis(isothiocyanato)-bis(N-(3-pyridyl)isonicotinamide)-cobalt

**Space Group:** P21/c      **Cell:**      **a** 8.727(0)      **b** 12.271(2)      **c** 13.301(2)  
**Space Group No.:** 14      **(Å, °)**       $\alpha$  90.00       $\beta$  110.13(0)       $\gamma$  90.00

**R-Factor (%):** 3.84      **Temperature(K):** 293      **Density(g/cm<sup>3</sup>):** 1.514

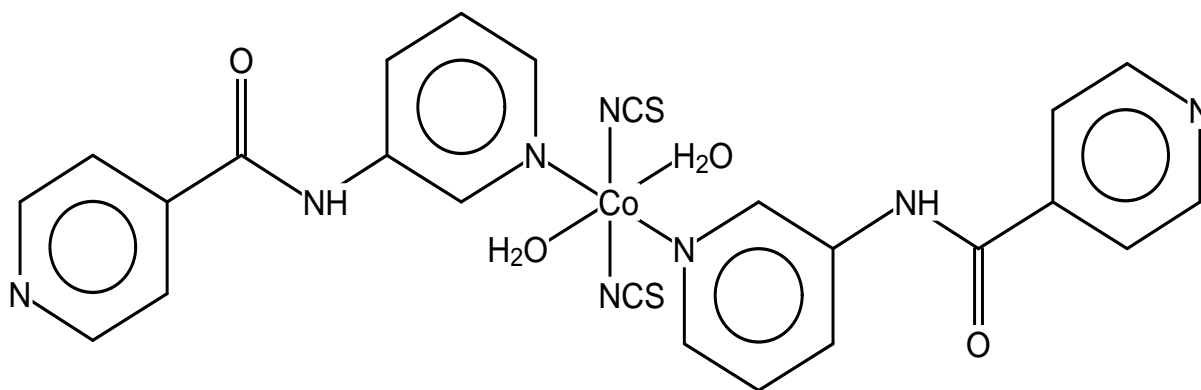

## Search: search5 (Thu May 26 10:17:05 2011): Hit 6

MOVPIW

**Reference:** K.Uemura, S.Kitagawa, M.Kondo, K.Fukui, R.Kitaura,  
Ho-Chol Chang, T.Mizutani (2002) *Chem.-Eur.J.* ,**8**,3586

**Formula:** (C<sub>24</sub> H<sub>18</sub> Co<sub>1</sub> N<sub>8</sub> O<sub>2</sub> S<sub>2</sub>)<sub>n</sub>,4n(C<sub>3</sub> H<sub>6</sub> O<sub>1</sub>)

**Compound Name:** catena-(bis(μ<sub>2</sub>-N-(3-Pyridyl)isonicotinamide)-bis(isothiocyanato)-cobalt  
acetone solvate)

**Space Group:** P21/n      **Cell:**      **a** 10.420(0)      **b** 14.668(0)      **c** 14.253(1)  
**Space Group No.:** 14      **(Å, °)**      **α** 90.00      **β** 97.51(0)      **γ** 90.00

**R-Factor (%):** 6.39      **Temperature(K):** 213      **Density(g/cm<sup>3</sup>):** 1.239

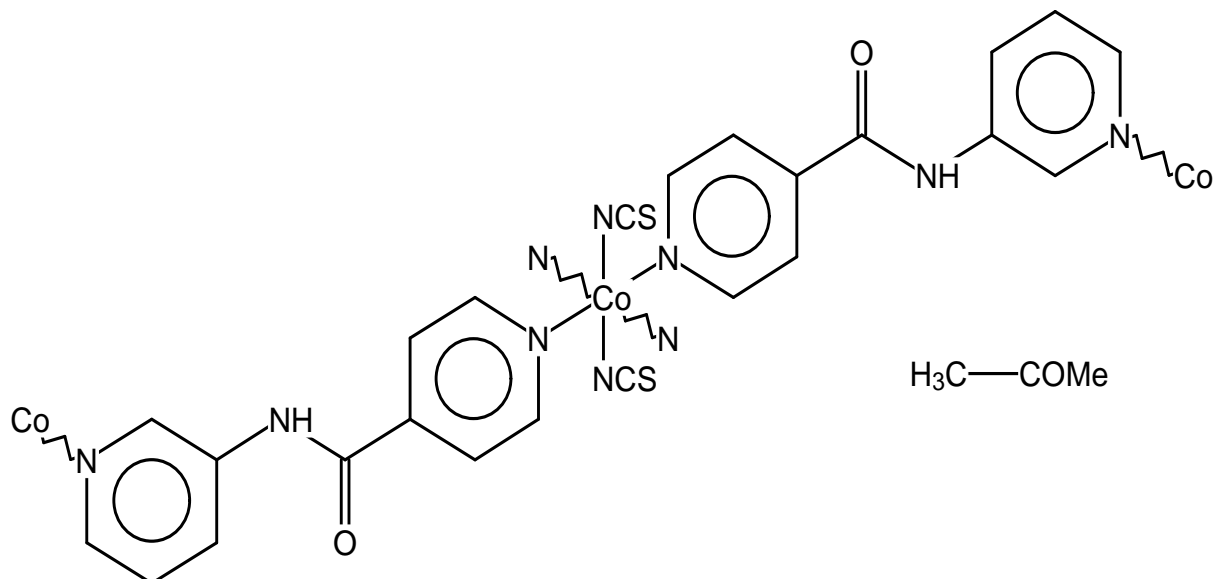

## Search: search5 (Thu May 26 10:17:05 2011): Hit 7

### MOVPOC

**Reference:** K.Uemura, S.Kitagawa, M.Kondo, K.Fukui, R.Kitaura,  
Ho-Chol Chang, T.Mizutani (2002) *Chem.-Eur.J.* ,**8**,3586

**Formula:** (C<sub>24</sub> H<sub>18</sub> Co<sub>1</sub> N<sub>8</sub> O<sub>2</sub> S<sub>2</sub>)<sub>n</sub>,4n(C<sub>4</sub> H<sub>8</sub> O<sub>1</sub>)

**Compound Name:** catena-(bis(μ<sub>2</sub>-N-(3-Pyridyl)isonicotinamido)-bis(isothiocyanato)-cobalt tetrahydrofuran solvate)

**Space Group:** P21/n      **Cell:**      **a** 10.460(3)      **b** 15.127(8)      **c** 14.317(0)  
**Space Group No.:** 14      **(Å, °)**      **α** 90.00      **β** 97.01(0)      **γ** 90.00

**R-Factor (%):** 7.23      **Temperature(K):** 293      **Density(g/cm<sup>3</sup>):** 1.273

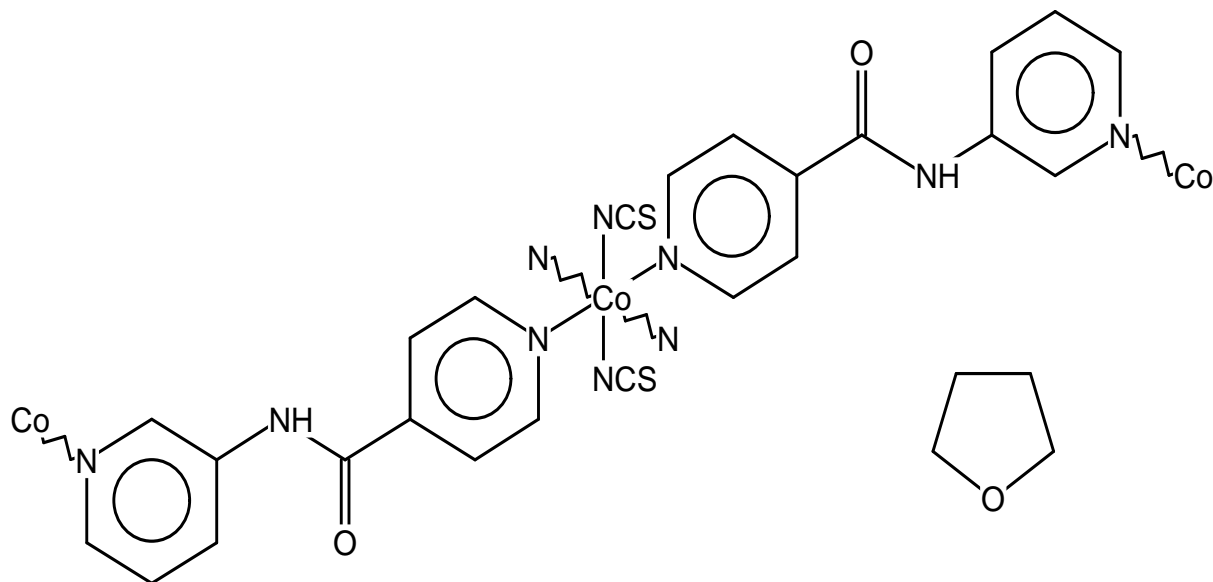

## Search: search5 (Thu May 26 10:17:05 2011): Hit 8

### PATMON

**Reference:** D.K.Kumar, A.Ballabh, D.A.Jose, P.Dastidar, A.Das  
(2005) *Cryst.Growth Des.* ,5,651

**Formula:**  $C_{11} H_{11} N_3 O_1^{2+}, Cl_4 Cu_1^{2-}$

**Compound Name:** N-(3-Pyridinio)isonicotinamidinium tetrachloro-copper

**Space Group:** P-1      **Cell:**    **a** 7.366(7)    **b** 7.380(4)    **c** 14.607(8)  
**Space Group No.:** 2      **(Å, °)**     $\alpha$  81.48(4)     $\beta$  75.94(8)     $\gamma$  89.73(7)

**R-Factor (%):** 7.12      **Temperature(K):** 293      **Density(g/cm<sup>3</sup>):** 1.774

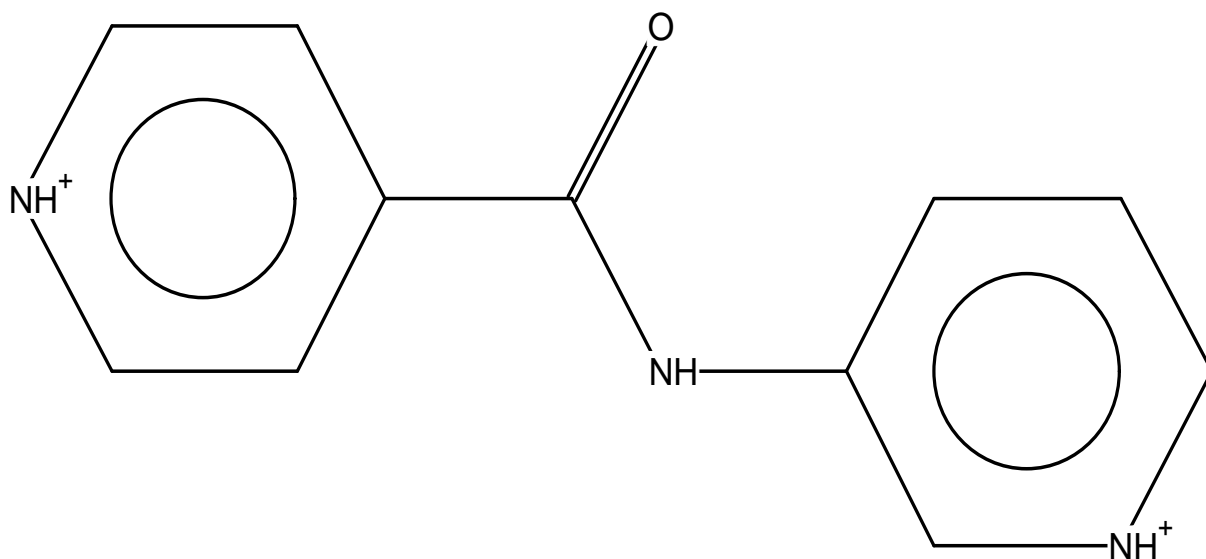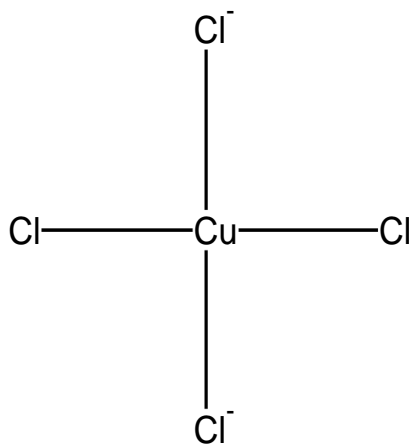

## Search: search5 (Thu May 26 10:17:05 2011): Hit 9

### SIXVIF

**Reference:** D.K.Kumar, A.Das, P.Dastidar (2007) *CrystEngComm* ,9, 548

**Formula:** (C<sub>22</sub> H<sub>18</sub> Cd<sub>1</sub> N<sub>8</sub> O<sub>8</sub>)<sub>n</sub>

**Compound Name:** catena-(bis(μ<sub>2</sub>-N-(3-Pyridyl)isonicotinamide-N',N'')-bis(nitrato-O)-cadmium(ii))

**Space Group:** P-1      **Cell:**    **a** 7.878(1)    **b** 8.234(1)    **c** 9.895(1)  
**Space Group No.:** 2      **(Å, °)**    **α** 93.22(0)    **β** 98.04(0)    **γ** 112.54(0)

**R-Factor (%):** 3.04      **Temperature(K):** 100      **Density(g/cm<sup>3</sup>):** 1.809

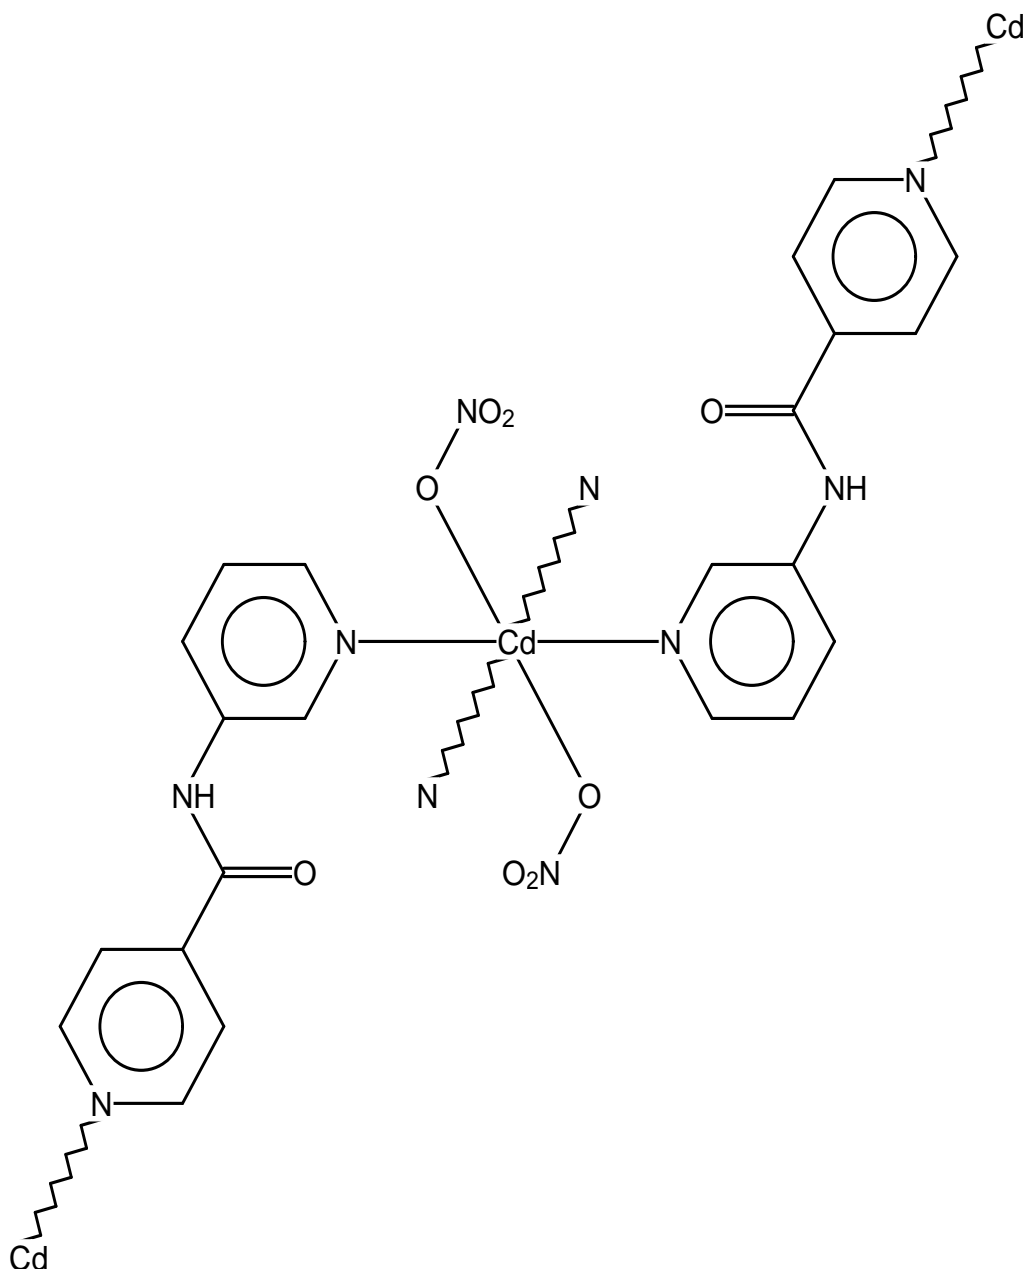

## Search: search5 (Thu May 26 10:17:05 2011): Hit 10

SIXVUR

**Reference:** D.K.Kumar, A.Das, P.Dastidar (2007) *CrystEngComm* ,9, 548

**Formula:** (C<sub>11</sub> H<sub>9</sub> Cl<sub>2</sub> N<sub>3</sub> O<sub>1</sub> Zn<sub>1</sub>)<sub>n</sub>

**Compound Name:** catena-((μ<sub>2</sub>-N-(3-Pyridyl)isonicotinamide-N',N'')-dichloro-zinc(ii))

**Space Group:** P21/n      **Cell:**      **a** 8.738(4)      **b** 9.491(4)      **c** 15.969(7)  
**Space Group No.:** 14      **(Å, °)**      α 90.00      β 92.92(0)      γ 90.00

**R-Factor (%):** 3.41      **Temperature(K):** 100      **Density(g/cm<sup>3</sup>):** 1.685

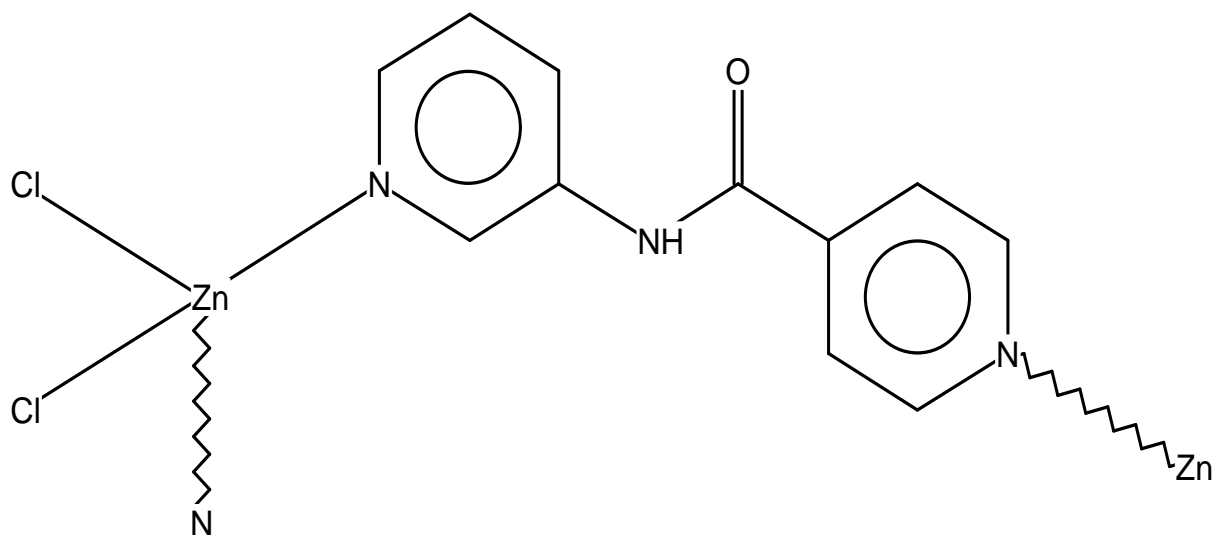

## Search: search5 (Thu May 26 10:17:05 2011): Hit 11

VODCUN

**Reference:** K.Uemura (2008) *Inorg.Chem.Commun.* ,11,741

**Formula:**  $(C_{22} H_{18} Ag_2 N_6 O_2^{2+})_n, 2n(F_6 P_1^{1-})$

**Compound Name:** catena-[bis( $\mu_2$ -N-Pyridin-3-ylisonicotinamido)-di-silver(i) bis(hexafluorophosphate)]

**Space Group:** P21/a      **Cell:**      **a** 17.896(2)      **b** 7.728(1)      **c** 21.378(0)

**Space Group No.:** 14      **(Å, °)**       $\alpha$  90.00       $\beta$  92.31(0)       $\gamma$  90.00

**R-Factor (%):** 5.91      **Temperature(K):** 293      **Density(g/cm<sup>3</sup>):** 2.033

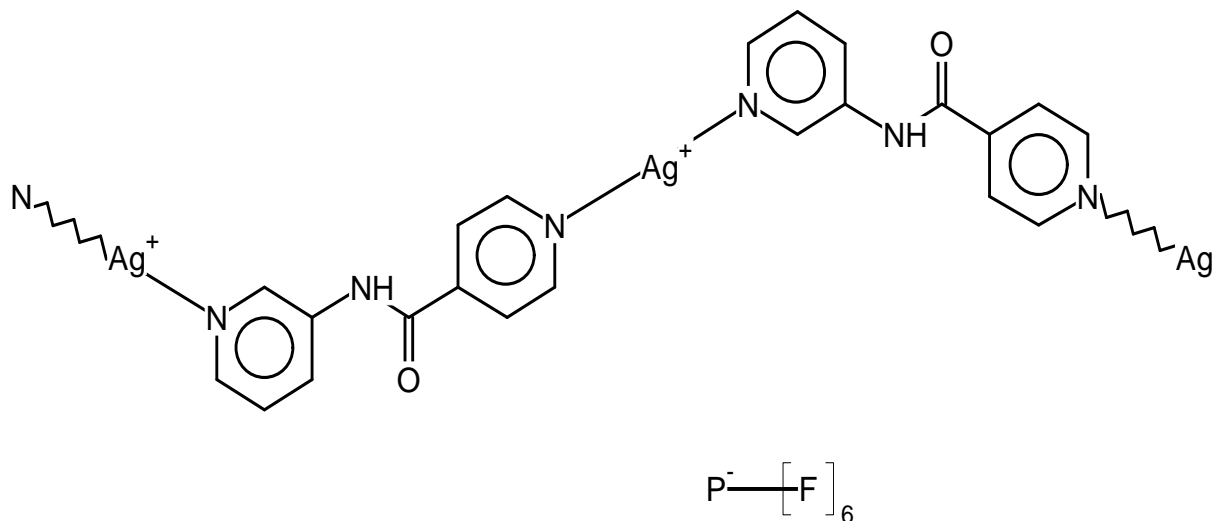

## Search: search5 (Thu May 26 10:17:05 2011): Hit 12

### VODDAU

**Reference:** K.Uemura (2008) *Inorg.Chem.Commun.* ,11,741

**Formula:** (C<sub>22</sub> H<sub>18</sub> Ag<sub>1</sub> N<sub>6</sub> O<sub>2</sub> 1<sup>+</sup>)<sub>n</sub>,n(F<sub>6</sub> P<sub>1</sub> 1<sup>-</sup>)

**Compound Name:** catena-[bis(μ<sub>2</sub>-N-Pyridin-3-ylisonicotinamido)-silver(i) hexafluorophosphate]

**Space Group:** P21/n      **Cell:**      **a** 11.522(2)      **b** 11.955(2)      **c** 18.206(0)

**Space Group No.:** 14      **(Å, °)**      **α** 90.00      **β** 100.72(0)      **γ** 90.00

**R-Factor (%):** 5.31      **Temperature(K):** 293      **Density(g/cm<sup>3</sup>):** 1.756

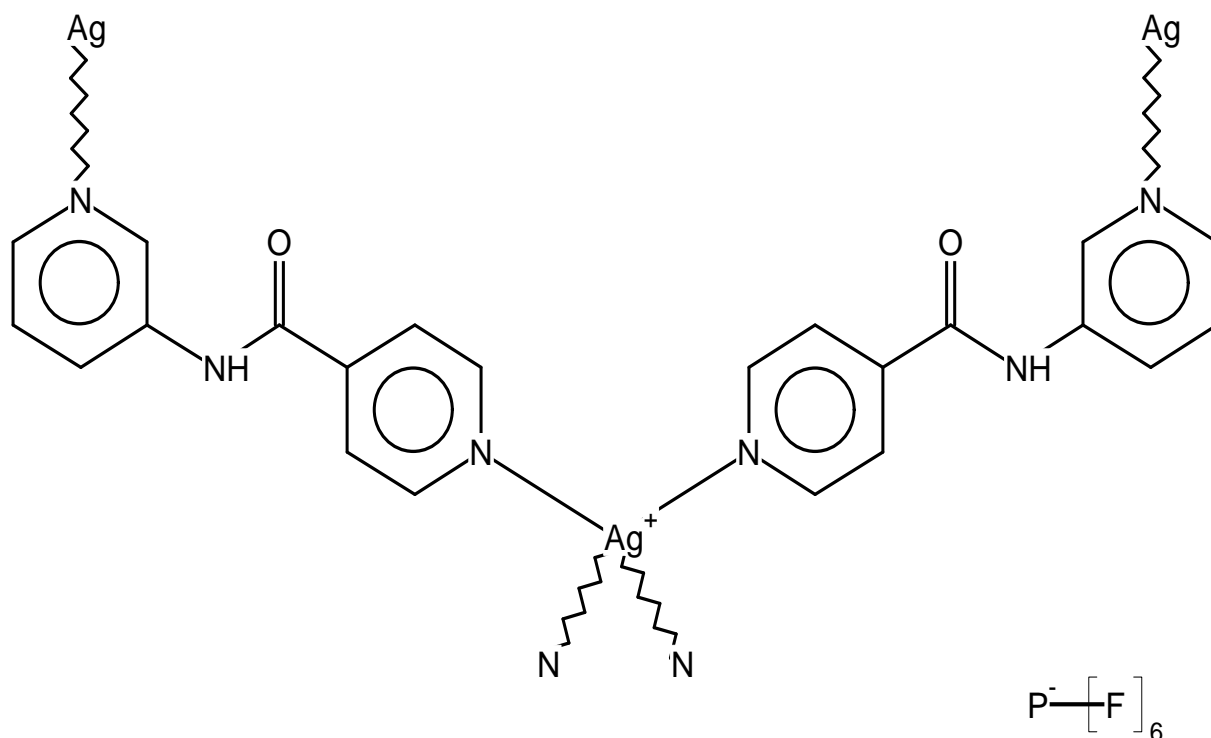



## Search: search5 (Thu May 26 10:17:05 2011): Hit 13

### YEPDON

**Reference:** D.K.Kumar, A.Das, P.Dastidar (2006) *Cryst.Growth Des.* ,  
6,1903

**Formula:**  $(C_{30} H_{30} N_6 O_{14} Zn_2)_n \cdot 2n(H_2 O)_1$

**Compound Name:** catena-(bis( $\mu_2$ -N-(3-Pyridyl)isonicotinamide-N,N')-tetra-aqua-  
bis(maleato-O,O')-di-zinc(ii) dihydrate)

**Space Group:** C2/c      **Cell:**    **a** 28.415(1)    **b** 7.348(0)    **c** 17.094(1)  
**Space Group No.:** 15      (**Å, °**)     $\alpha$  90.00       $\beta$  108.47(0)     $\gamma$  90.00

**R-Factor (%):** 2.40      **Temperature(K):** 100      **Density(g/cm<sup>3</sup>):** 1.698

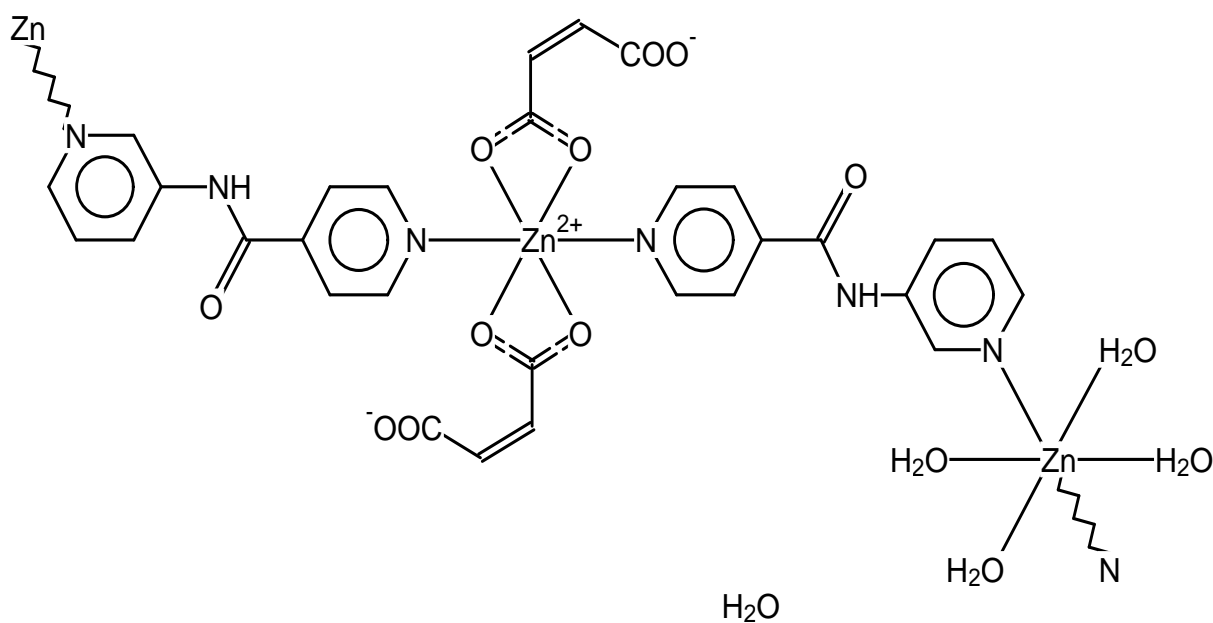

## Search Overview

**Search:** search6  
**Date/Time done:** Thu May 26 10:18:38 2011  
**Database(s):** CSD version 5.32 (November 2010)  
CSD version 5.32 updates (Nov 2010)  
**Restriction Info:** No refcode restrictions applied  
**Filters:** None  
**Percentage Completed:** 100%  
**Number of Hits:** 10

*Summary of queries used. Search found structures that:*

match

**Query 1**

**Query 2**

**Query 1**

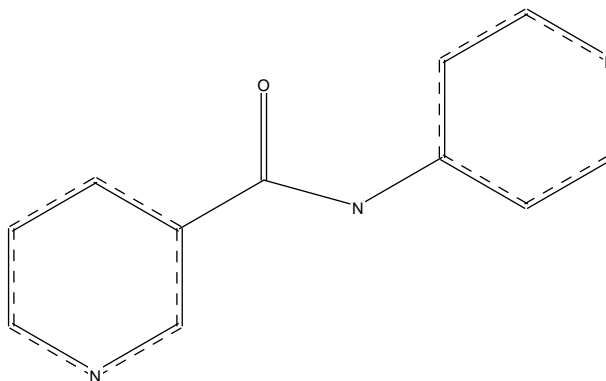

**Query 2**

4M

## Search: search6 (Thu May 26 10:18:38 2011): Hit 1

### DEPTAU

**Reference:** D.K.Kumar, A.Das, P.Dastidar (2006) *J.Mol.Struct.* ,**796**, 139

**Formula:** (C<sub>38</sub> H<sub>38</sub> Co<sub>2</sub> N<sub>6</sub> O<sub>16</sub>)<sub>n</sub>.2.26n(H<sub>2</sub> O<sub>1</sub>)

**Compound Name:** catena-(bis(N-(4-Pyridyl)nicotinamide)-bis(phthalato)-hexaaqua-di-cobalt(ii) hydrate)

**Space Group:** P21/c      **Cell:**      **a** 11.656(0)      **b** 8.036(0)      **c** 23.634(1)  
**Space Group No.:** 14      **(Å, °)**      **α** 90.00      **β** 103.40(0)      **γ** 90.00

**R-Factor (%):** 4.11      **Temperature(K):** 100      **Density(g/cm<sup>3</sup>):** 1.532

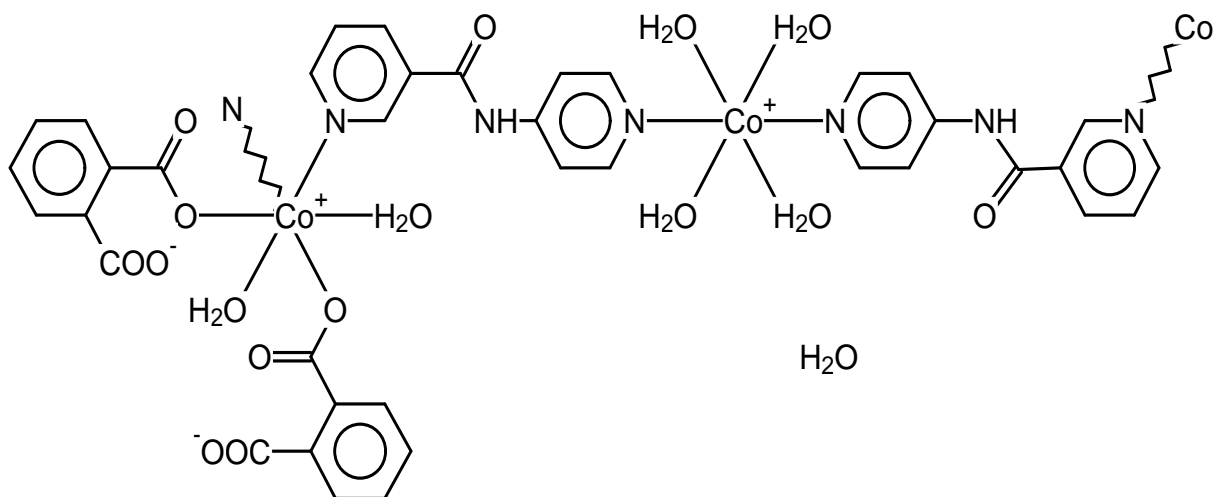

## Search: search6 (Thu May 26 10:18:38 2011): Hit 2

### KAZVUD

**Reference:** D.K.Kumar, A.Das, P.Dastidar (2006) *Cryst.Growth Des.* ,  
6,216

**Formula:**  $C_{11} H_{11} N_3 O_1^{2+}, Cl_4 Pt_1^{2-}$

**Compound Name:** N-(4-Pyridinio)nicotinamidinium tetrachloro-platinum

**Space Group:** Pbcu      **Cell:**      **a** 27.370(9)      **b** 6.884(2)      **c** 15.483(5)  
**Space Group No.:** 61      **(Å, °)**       $\alpha$  90.00       $\beta$  90.00       $\gamma$  90.00

**R-Factor (%):** 4.17      **Temperature(K):** 298      **Density(g/cm<sup>3</sup>):** 2.450

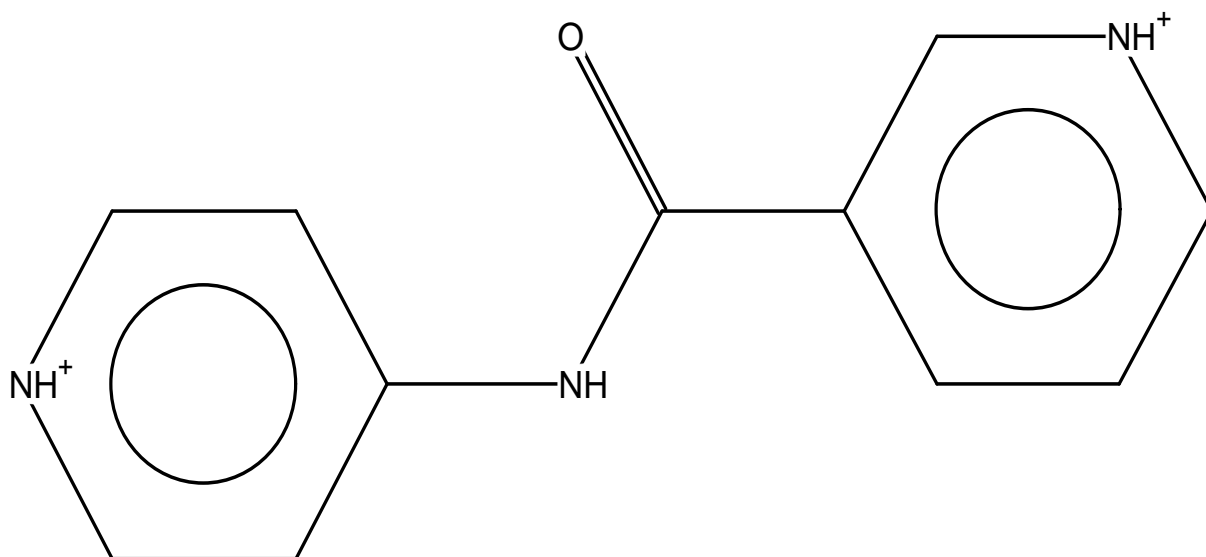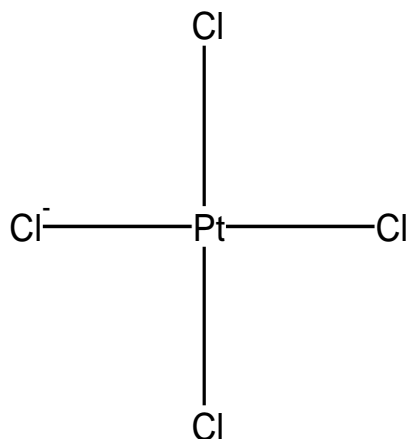

## Search: search6 (Thu May 26 10:18:38 2011): Hit 3

MOYXOO

**Reference:** D.K.Kumar (2009) *Inorg.Chim.Acta* ,**362**,1767

**Formula:** C<sub>25</sub> H<sub>24</sub> Co<sub>1</sub> N<sub>6</sub> O<sub>8</sub>

**Compound Name:** (malonato)-bis(N-(4-pyridinyl)nicotinamide)-diaqua-cobalt(ii)

**Space Group:** C2/c      **Cell:**      **a** 22.092(4)      **b** 7.532(1)      **c** 17.168(3)  
**Space Group No.:** 15      **(Å, °)**       $\alpha$  90.00       $\beta$  119.02(0)       $\gamma$  90.00

**R-Factor (%):** 6.81      **Temperature(K):** 100      **Density(g/cm<sup>3</sup>):** 1.583

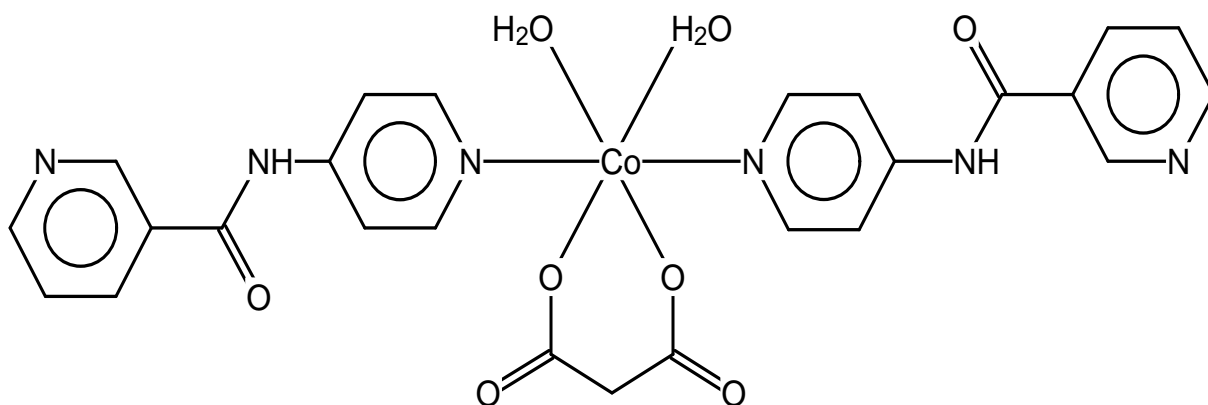

## Search: search6 (Thu May 26 10:18:38 2011): Hit 4

MOYXUU

**Reference:** D.K.Kumar (2009) *Inorg.Chim.Acta* ,**362**,1767

**Formula:** C<sub>25</sub> H<sub>24</sub> N<sub>6</sub> O<sub>8</sub> Zn<sub>1</sub>

**Compound Name:** (malonato)-bis(N-(4-pyridinyl)nicotinamide)-diaqua-zinc(ii)

**Space Group:** C2/c      **Cell:**      **a** 22.069(2)      **b** 7.548(0)      **c** 17.153(1)  
**Space Group No.:** 15      **(Å, °)**       $\alpha$  90.00       $\beta$  118.95(0)       $\gamma$  90.00

**R-Factor (%):** 5.92      **Temperature(K):** 100      **Density(g/cm<sup>3</sup>):** 1.599

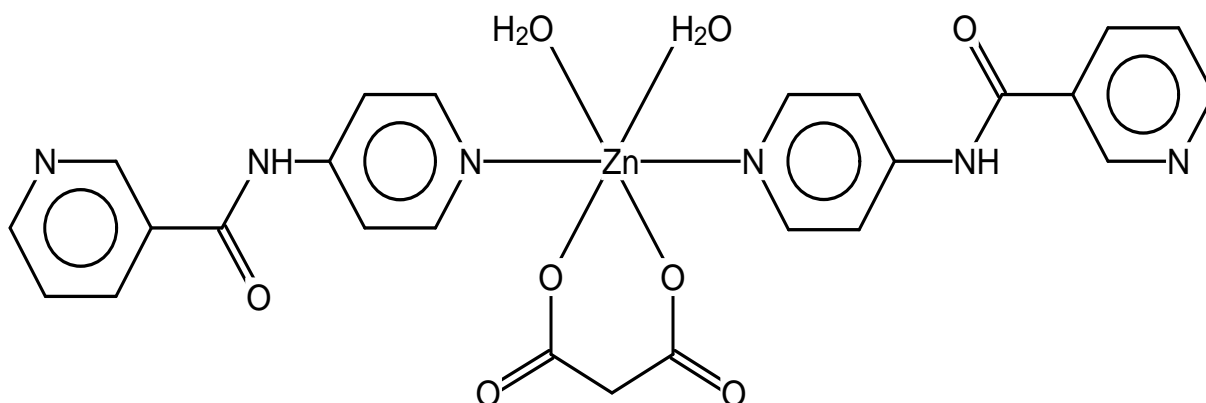

## Search: search6 (Thu May 26 10:18:38 2011): Hit 5

### MOYYAB

**Reference:** D.K.Kumar (2009) *Inorg.Chim.Acta* ,**362**,1767

**Formula:** (C<sub>16</sub> H<sub>17</sub> Co<sub>1</sub> N<sub>3</sub> O<sub>6</sub>)<sub>n</sub>,n(H<sub>2</sub> O<sub>1</sub>)

**Compound Name:** catena-((μ<sub>2</sub>-N-(4-Pyridinyl)nicotinamide)-(μ<sub>2</sub>-glutarato)-aqua-cobalt(ii) monohydrate)

**Space Group:** C2/c      **Cell:**    **a** 23.462(2)    **b** 8.957(0)    **c** 17.297(1)  
**Space Group No.:** 15      **(Å, °)**    **α** 90.00      **β** 108.77(0)    **γ** 90.00

**R-Factor (%):** 5.52      **Temperature(K):** 100      **Density(g/cm<sup>3</sup>):** 1.638

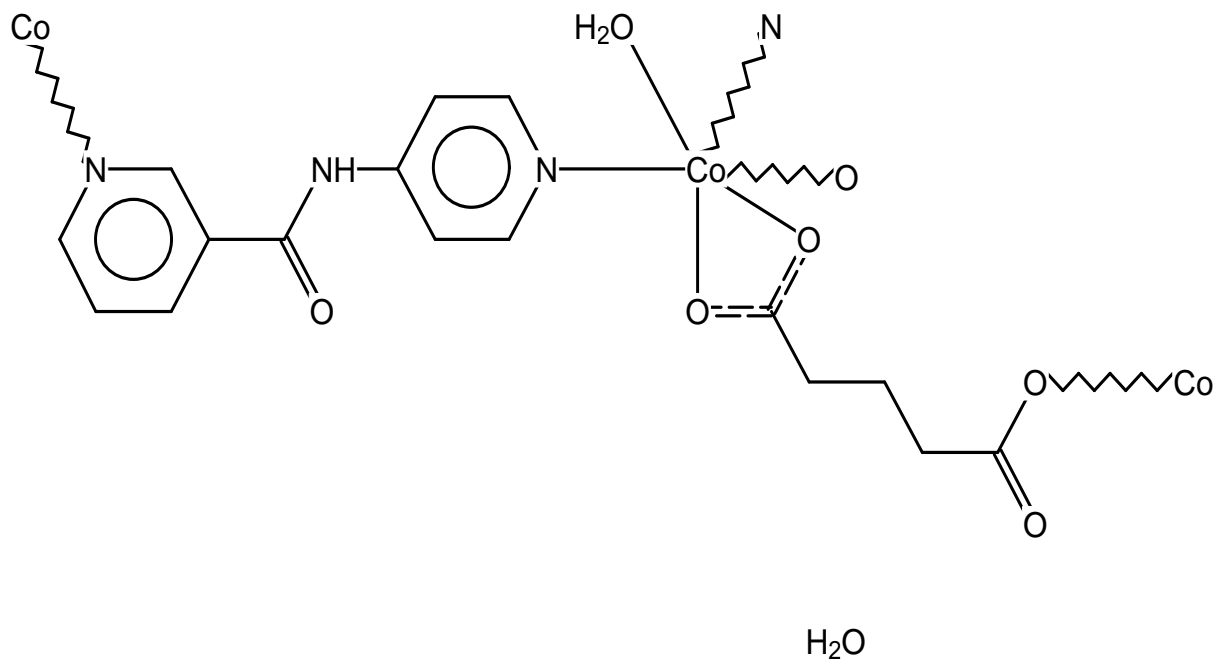

## Search: search6 (Thu May 26 10:18:38 2011): Hit 6

### PAQLEZ

**Reference:** D.K.Kumar, A.Ballabh, D.A.Jose, P.Dastidar, A.Das  
(2005) *Cryst.Growth Des.* ,5,651

**Formula:** C<sub>11</sub> H<sub>11</sub> N<sub>3</sub> O<sub>1</sub><sup>2+</sup>, Cl<sub>4</sub> Cu<sub>1</sub><sup>2-</sup>

**Compound Name:** N-(4-Pyridinio)nicotinamidinium tetrachloro-copper

**Space Group:** P-1      **Cell:**    **a** 8.276(0)    **b** 8.820(0)    **c** 11.713(1)  
**Space Group No.:** 2      **(Å, °)**     $\alpha$  99.67(0)     $\beta$  94.10(0)     $\gamma$  112.41(0)

**R-Factor (%):** 4.13      **Temperature(K):** 273      **Density(g/cm<sup>3</sup>):** 1.752

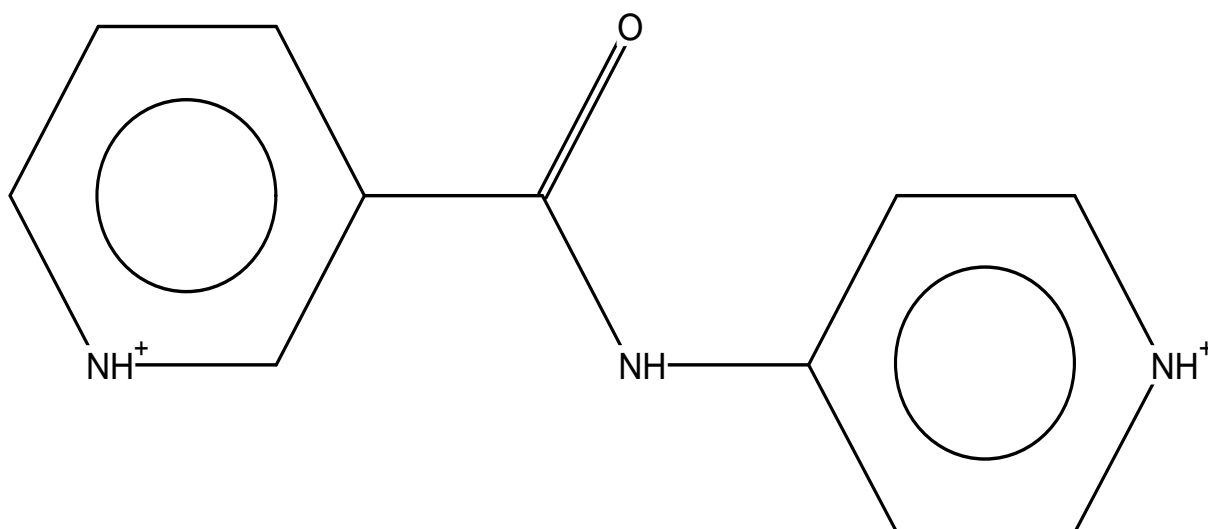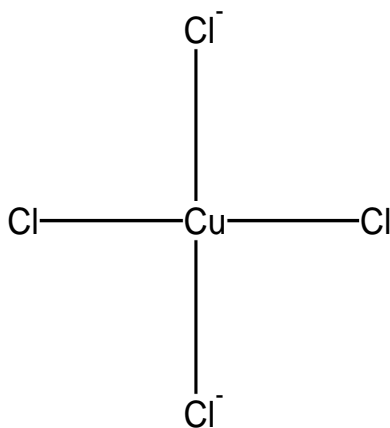



## Search: search6 (Thu May 26 10:18:38 2011): Hit 7

### YEPDUT

**Reference:** D.K.Kumar, A.Das, P.Dastidar (2006) *Cryst.Growth Des.* ,  
6,1903

**Formula:**  $(C_{30} H_{34} Co_2 N_6 O_{16})n, 2n(H_2 O_1)$

**Compound Name:** catena-(bis( $\mu_2$ -N-(4-Pyridyl)nicotinamide-N,N')-hexa-aqua-bis(maleato-O)-di-cobalt dihydrate)

**Space Group:** P-1      **Cell:**    **a** 7.892(1)    **b** 10.213(1)    **c** 11.673(1)  
**Space Group No.:** 2      (**Å, °**)     $\alpha$  104.83(0)     $\beta$  95.28(0)     $\gamma$  90.16(0)

**R-Factor (%):** 7.10      **Temperature(K):** 100      **Density(g/cm<sup>3</sup>):** 1.630

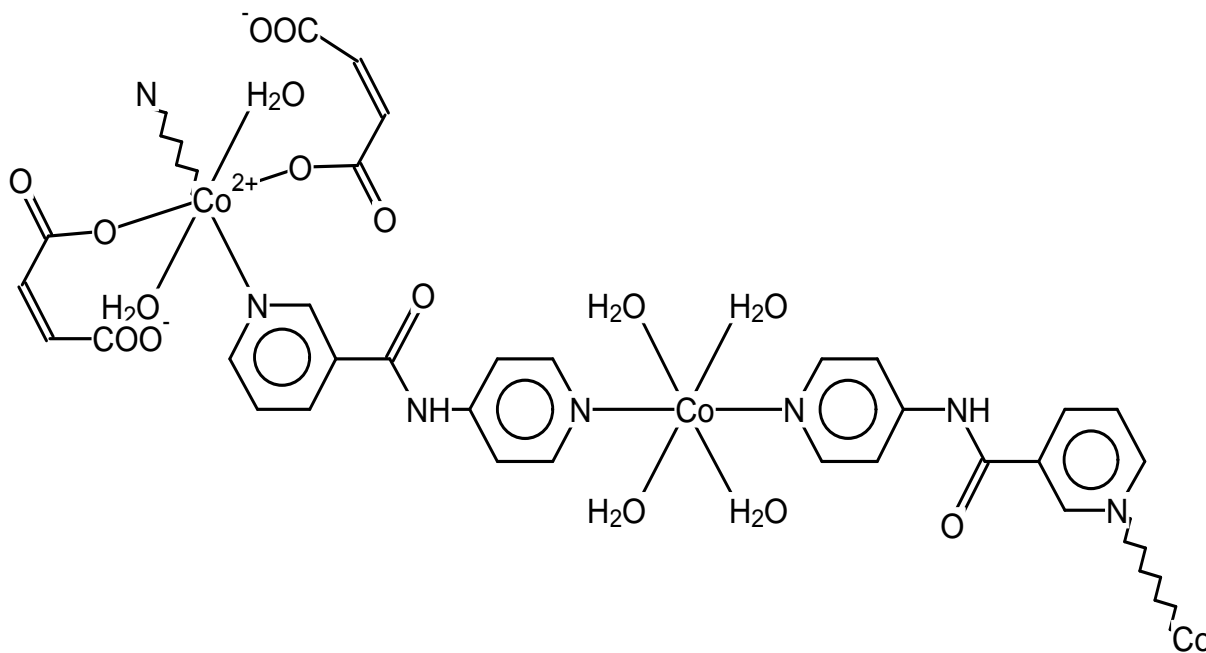

## Search: search6 (Thu May 26 10:18:38 2011): Hit 8

YEPFAB

**Reference:** D.K.Kumar, A.Das, P.Dastidar (2006) *Cryst.Growth Des.* ,  
6,1903

**Formula:** (C<sub>15</sub> H<sub>11</sub> N<sub>3</sub> O<sub>5</sub> Zn<sub>1</sub>)<sub>n</sub>

**Compound Name:** catena-((μ<sub>2</sub>-Maleato-O,O')-(μ<sub>2</sub>-N-(4-pyridyl)nicotinamide-N,N')-zinc)

**Space Group:** P21/n      **Cell:**      **a** 7.236(0)      **b** 19.159(1)      **c** 10.721(0)  
**Space Group No.:** 14      **(Å, °)**      **α** 90.00      **β** 104.73(0)      **γ** 90.00

**R-Factor (%):** 2.72      **Temperature(K):** 100      **Density(g/cm<sup>3</sup>):** 1.750

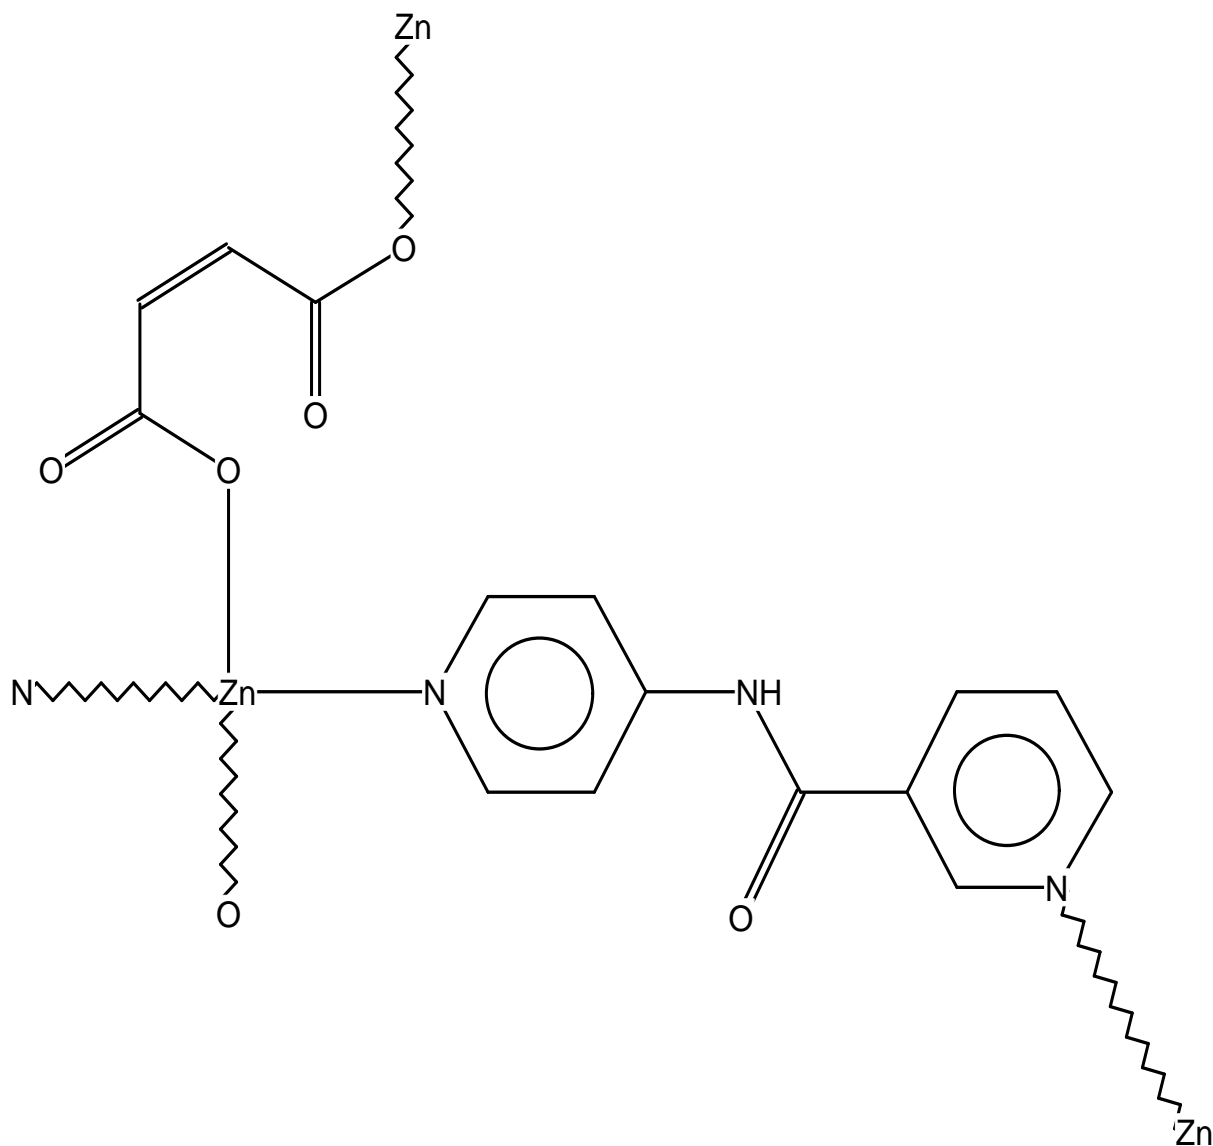

## Search: search6 (Thu May 26 10:18:38 2011): Hit 9

YEPFEF

**Reference:** D.K.Kumar, A.Das, P.Dastidar (2006) *Cryst.Growth Des.* ,  
6,1903

**Formula:**  $(C_{15} H_{13} Cd_1 N_3 O_6)_n \cdot 2n(H_2 O_1)$

**Compound Name:** catena-(( $\mu_2$ -Maleato-O,O',O'',O''')-( $\mu_2$ -N-(4-pyridyl)nicotinamide-N,N')-  
aqua-cadmium dihydrate)

**Space Group:** C2      **Cell:**    **a** 24.139(2)    **b** 9.138(0)    **c** 8.270(0)  
**Space Group No.:** 5      (**Å, °**)     $\alpha$  90.00       $\beta$  107.59(0)     $\gamma$  90.00

**R-Factor (%):** 4.61      **Temperature(K):** 100      **Density(g/cm<sup>3</sup>):** 1.832

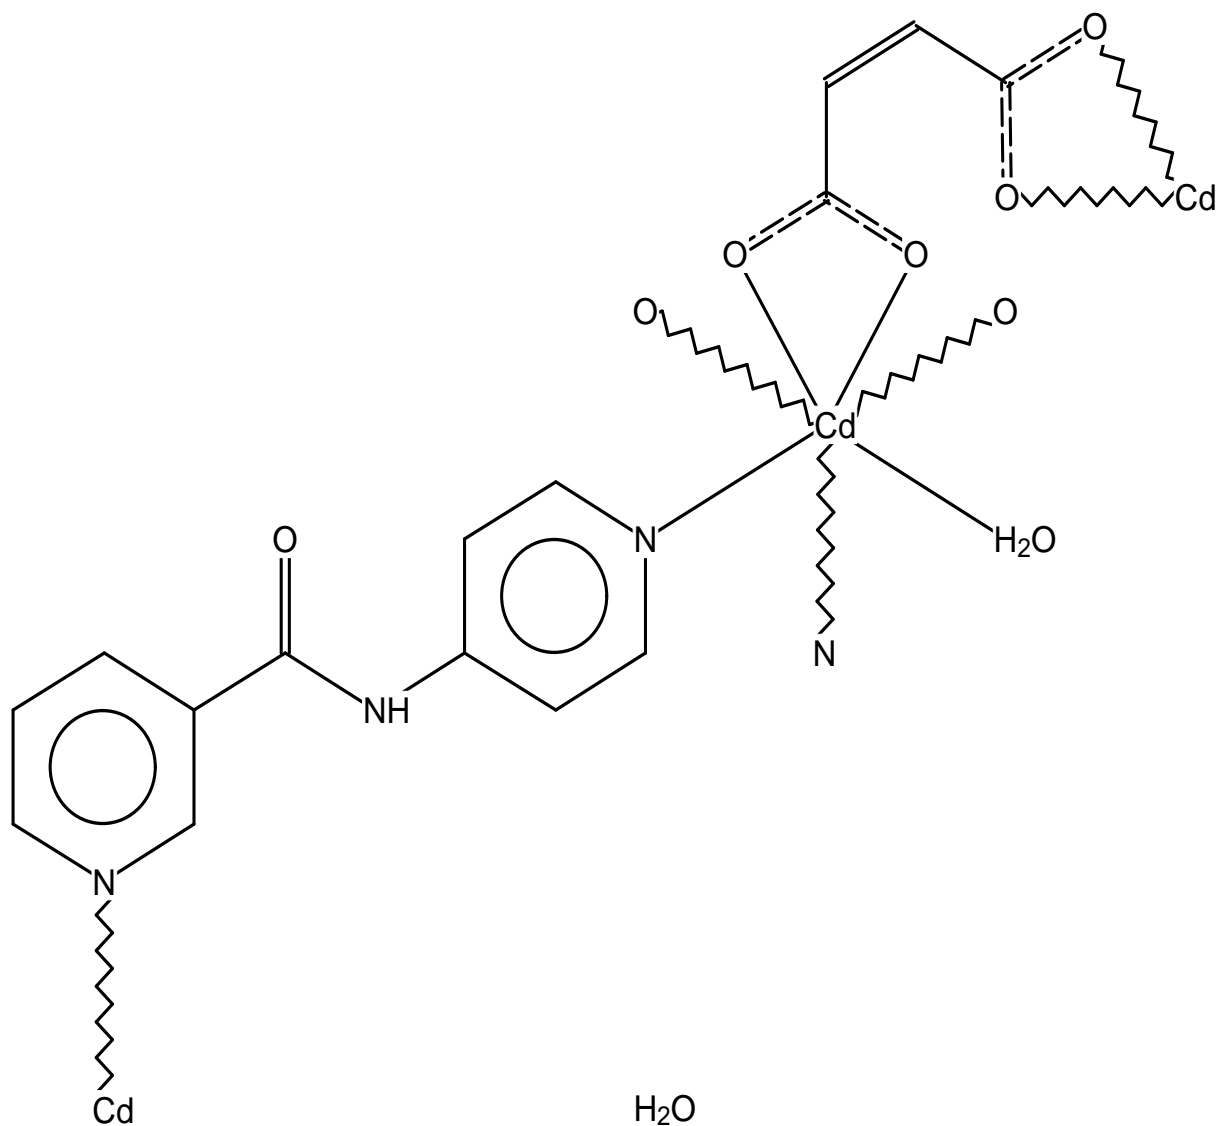

## Search: search6 (Thu May 26 10:18:38 2011): Hit 10

YEPFIJ

**Reference:** D.K.Kumar, A.Das, P.Dastidar (2006) *Cryst.Growth Des.* ,  
6,1903

**Formula:**  $(C_{30} H_{38} Co_2 N_6 O_{16})_n \cdot 2.56n(H_2 O)_1$

**Compound Name:** catena-(bis( $\mu_2$ -N-(4-Pyridyl)nicotinamide-N,N')-hexa-aqua-bis(succinato-O)-di-cobalt hydrate)

**Space Group:** P-1      **Cell:**    **a** 8.004(0)    **b** 10.729(0)    **c** 11.336(0)  
**Space Group No.:** 2      (**Å, °**)     $\alpha$  78.36(0)     $\beta$  87.12(0)     $\gamma$  79.89(0)

**R-Factor (%):** 2.82      **Temperature(K):** 100      **Density(g/cm<sup>3</sup>):** 1.597

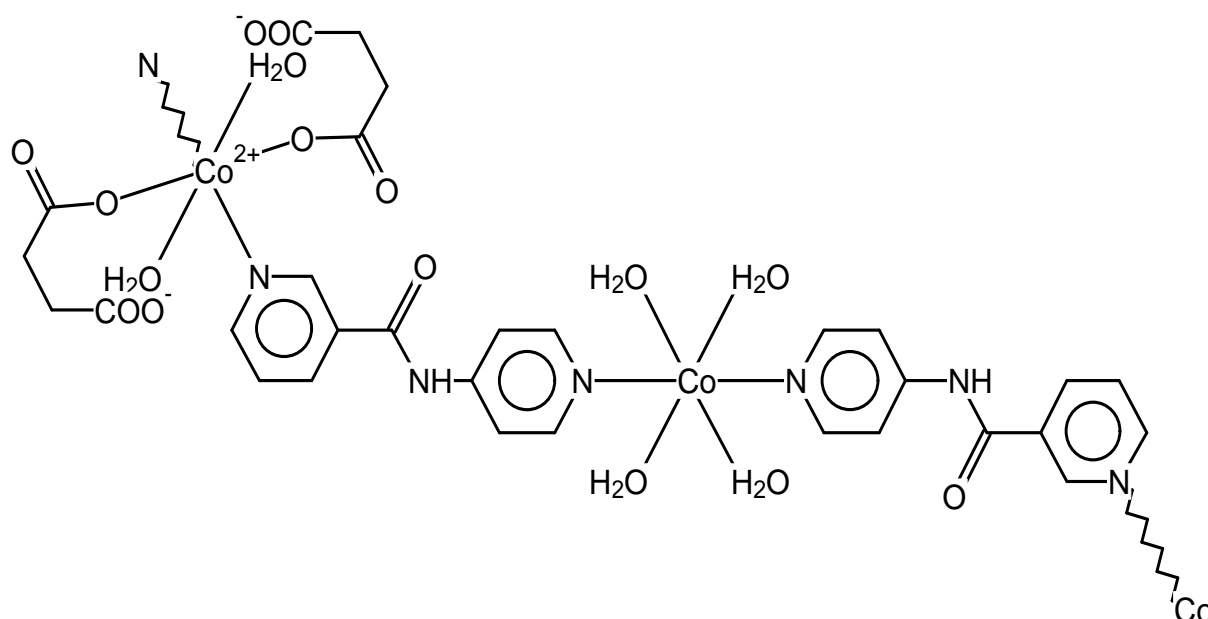

H<sub>2</sub>O

## Search Overview

**Search:** search7  
**Date/Time done:** Thu May 26 10:20:13 2011  
**Database(s):** CSD version 5.32 (November 2010)  
CSD version 5.32 updates (Nov 2010)  
**Restriction Info:** No refcode restrictions applied  
**Filters:** None  
**Percentage Completed:** 100%  
**Number of Hits:** 9

*Summary of queries used. Search found structures that:*

match

**Query 1**

**Query 2**

**Query 1**

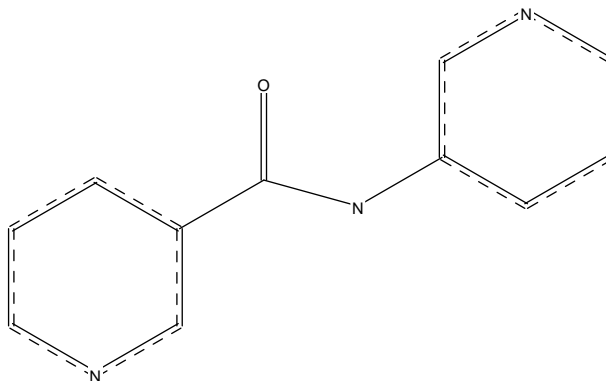

**Query 2**

4M

## Search: search7 (Thu May 26 10:20:13 2011): Hit 1

### AVUBAU

**Reference:** K.Uemura, S.Kitagawa, K.Fukui, K.Saito (2004)  
*J.Am.Chem.Soc.* ,**126**,3817

**Formula:** (C<sub>22</sub> H<sub>18</sub> Co<sub>1</sub> N<sub>8</sub> O<sub>8</sub>)<sub>n</sub>

**Compound Name:** catena-(bis(μ<sub>2</sub>-N-(3-Pyridyl)nicotinamide-N,N')-bis(nitrato-O)-cobalt(ii))

**Space Group:** Pbcn      **Cell:**      **a** 18.300(0)      **b** 10.759(3)      **c** 11.458(2)  
**Space Group No.:** 60      **(Å, °)**      α 90.00      β 90.00      γ 90.00

**R-Factor (%):** 6.63      **Temperature(K):** 223      **Density(g/cm<sup>3</sup>):** 1.712

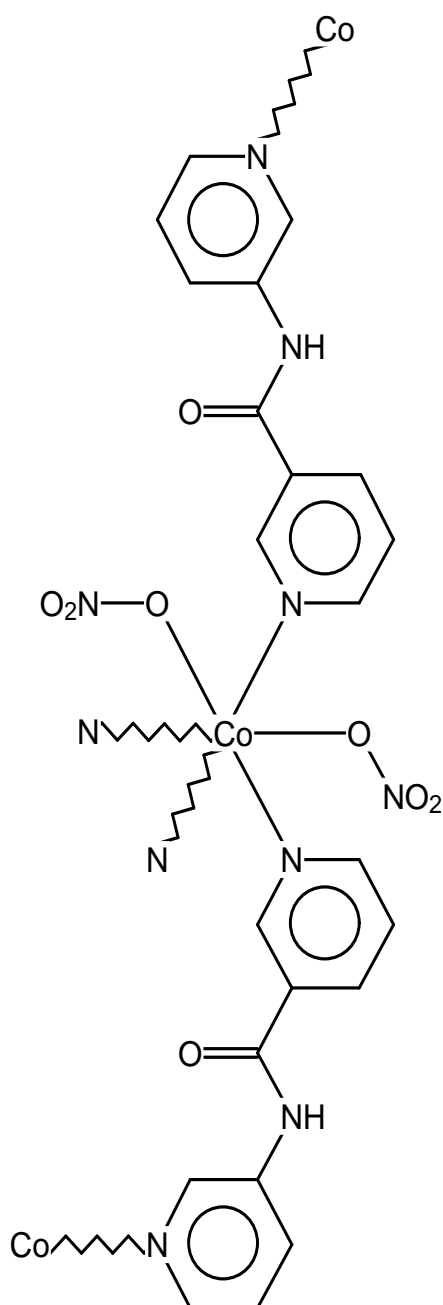

## Search: search7 (Thu May 26 10:20:13 2011): Hit 2

### AVUBEY

**Reference:** K.Uemura, S.Kitagawa, K.Fukui, K.Saito (2004)  
*J.Am.Chem.Soc.* ,**126**,3817

**Formula:** (C<sub>22</sub> H<sub>18</sub> Br<sub>2</sub> Co<sub>1</sub> N<sub>6</sub> O<sub>2</sub>)<sub>n</sub>

**Compound Name:** catena-(bis( $\mu_2$ -N-(3-Pyridyl)nicotinamide-N,N')-dibromo-cobalt(ii))

**Space Group:** Ccca      **Cell:**      **a** 10.481(7)      **b** 19.030(10)      **c** 10.894(8)  
**Space Group No.:** 68      **(Å, °)**       $\alpha$  90.00       $\beta$  90.00       $\gamma$  90.00

**R-Factor (%):** 5.32      **Temperature(K):** 293      **Density(g/cm<sup>3</sup>):** 1.887

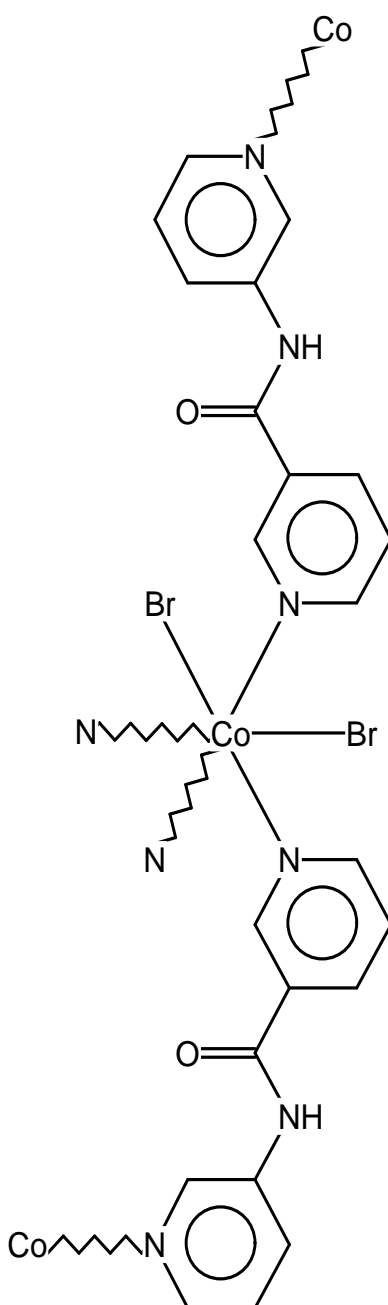

## Search: search7 (Thu May 26 10:20:13 2011): Hit 3

MOVPU1

**Reference:** K.Uemura, S.Kitagawa, M.Kondo, K.Fukui, R.Kitaura,  
Ho-Chol Chang, T.Mizutani (2002) *Chem.-Eur.J.* ,**8**,3586

**Formula:** (C<sub>24</sub> H<sub>18</sub> Co<sub>1</sub> N<sub>8</sub> O<sub>2</sub> S<sub>2</sub>)<sub>n</sub>

**Compound Name:** catena-(bis(μ<sub>2</sub>-N-(3-Pyridyl)nicotinamido)-bis(isothiocyanato)-cobalt)

**Space Group:** P21/c      **Cell:**      **a** 8.805(3)      **b** 15.585(7)      **c** 9.521(0)  
**Space Group No.:** 14      **(Å, °)**      **α** 90.00      **β** 98.73(0)      **γ** 90.00

**R-Factor (%):** 5.76      **Temperature(K):** 293      **Density(g/cm<sup>3</sup>):** 1.475

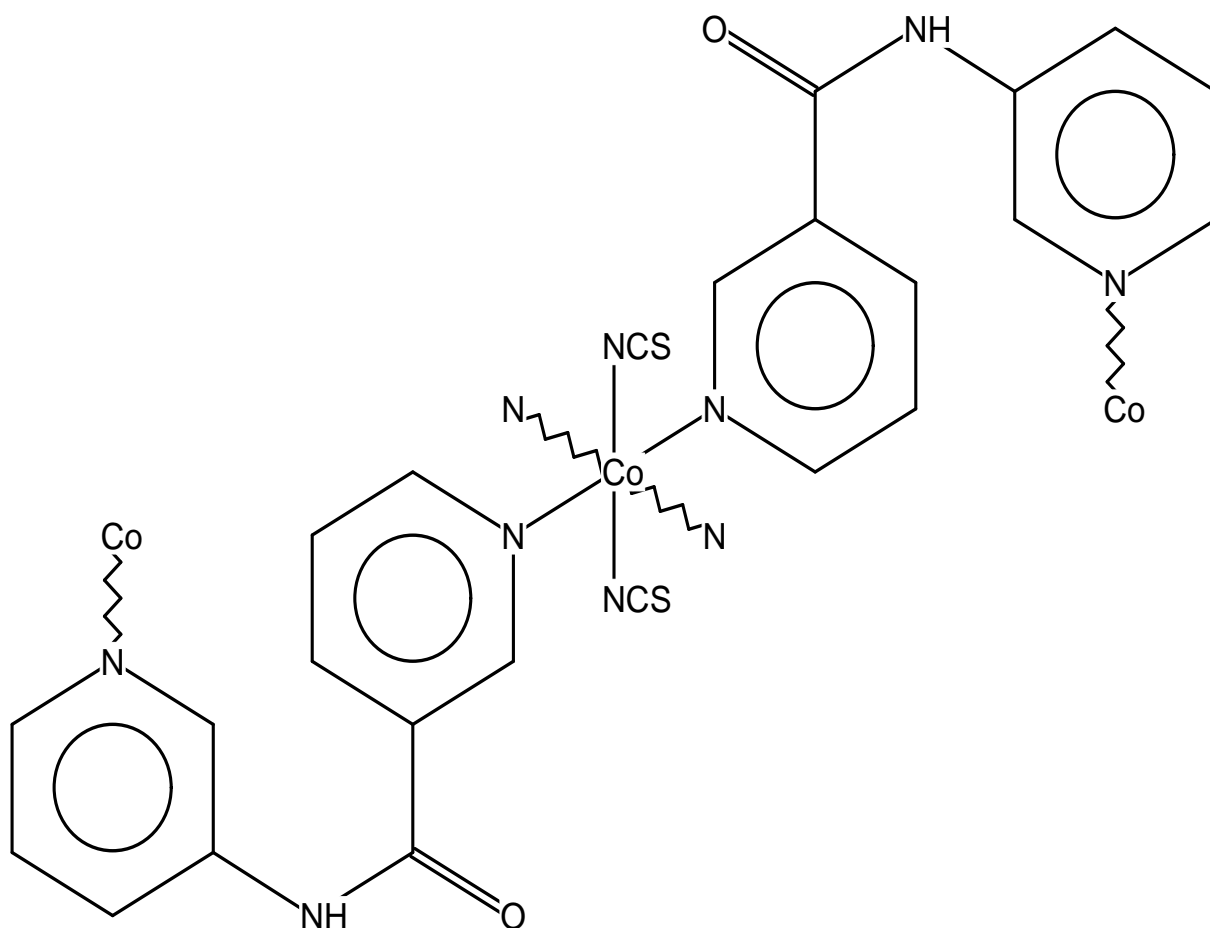



## Search: search7 (Thu May 26 10:20:13 2011): Hit 4

### SIXTUP

**Reference:** D.K.Kumar, A.Das, P.Dastidar (2007) *CrystEngComm*, **9**, 548

**Formula:** (C<sub>15</sub> H<sub>15</sub> N<sub>3</sub> O<sub>5</sub> Zn<sub>1</sub>)<sub>n</sub>

**Compound Name:** catena-((μ<sub>2</sub>-N-(3-Pyridyl)nicotinamide-N',N'')-(μ<sub>2</sub>-acetato-O,O')-(acetato-O)-zinc(ii))

**Space Group:** P-1      **Cell:**    **a** 7.964(1)    **b** 9.153(1)    **c** 10.963(1)  
**Space Group No.:** 2      **(Å, °)**    **α** 84.75(0)    **β** 79.25(0)    **γ** 79.58(0)

**R-Factor (%):** 4.71      **Temperature(K):** 298      **Density(g/cm<sup>3</sup>):** 1.649

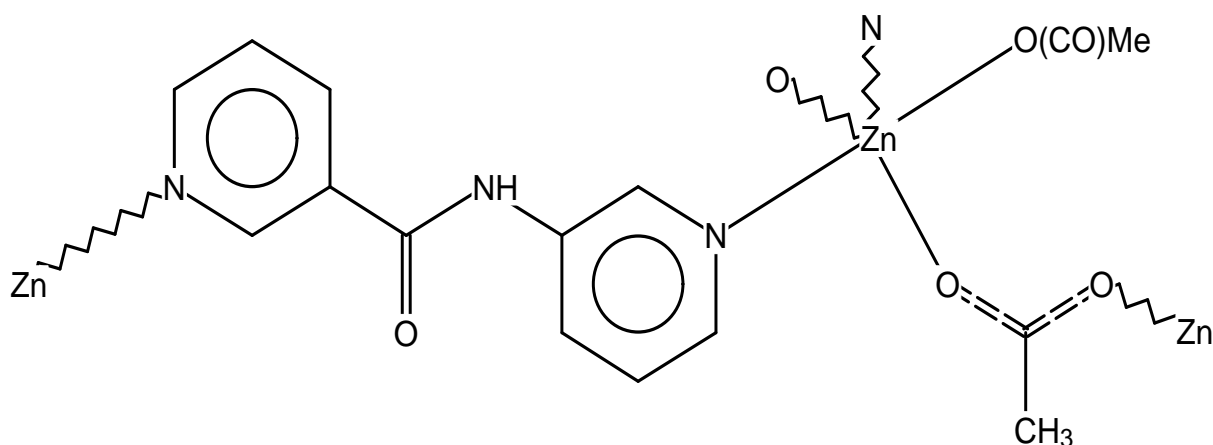

## Search: search7 (Thu May 26 10:20:13 2011): Hit 5

### SIXVAX

**Reference:** D.K.Kumar, A.Das, P.Dastidar (2007) *CrystEngComm* ,9, 548

**Formula:**  $(C_{22}H_{22}N_6O_4Zn_1^{2+})_n, 2n(B_1F_4^{-1})$

**Compound Name:** catena-(bis( $\mu_2$ -N-(3-Pyridyl)nicotinamide-N',N'')-diaqua-zinc(ii) bis(tetrafluoroborate))

**Space Group:** P21/c      **Cell:**      **a** 8.486(4)      **b** 9.551(4)      **c** 16.351(6)  
**Space Group No.:** 14      **(Å, °)**       $\alpha$  90.00       $\beta$  97.79(2)       $\gamma$  90.00

**R-Factor (%):** 6.67      **Temperature(K):** 298      **Density(g/cm<sup>3</sup>):** 1.703

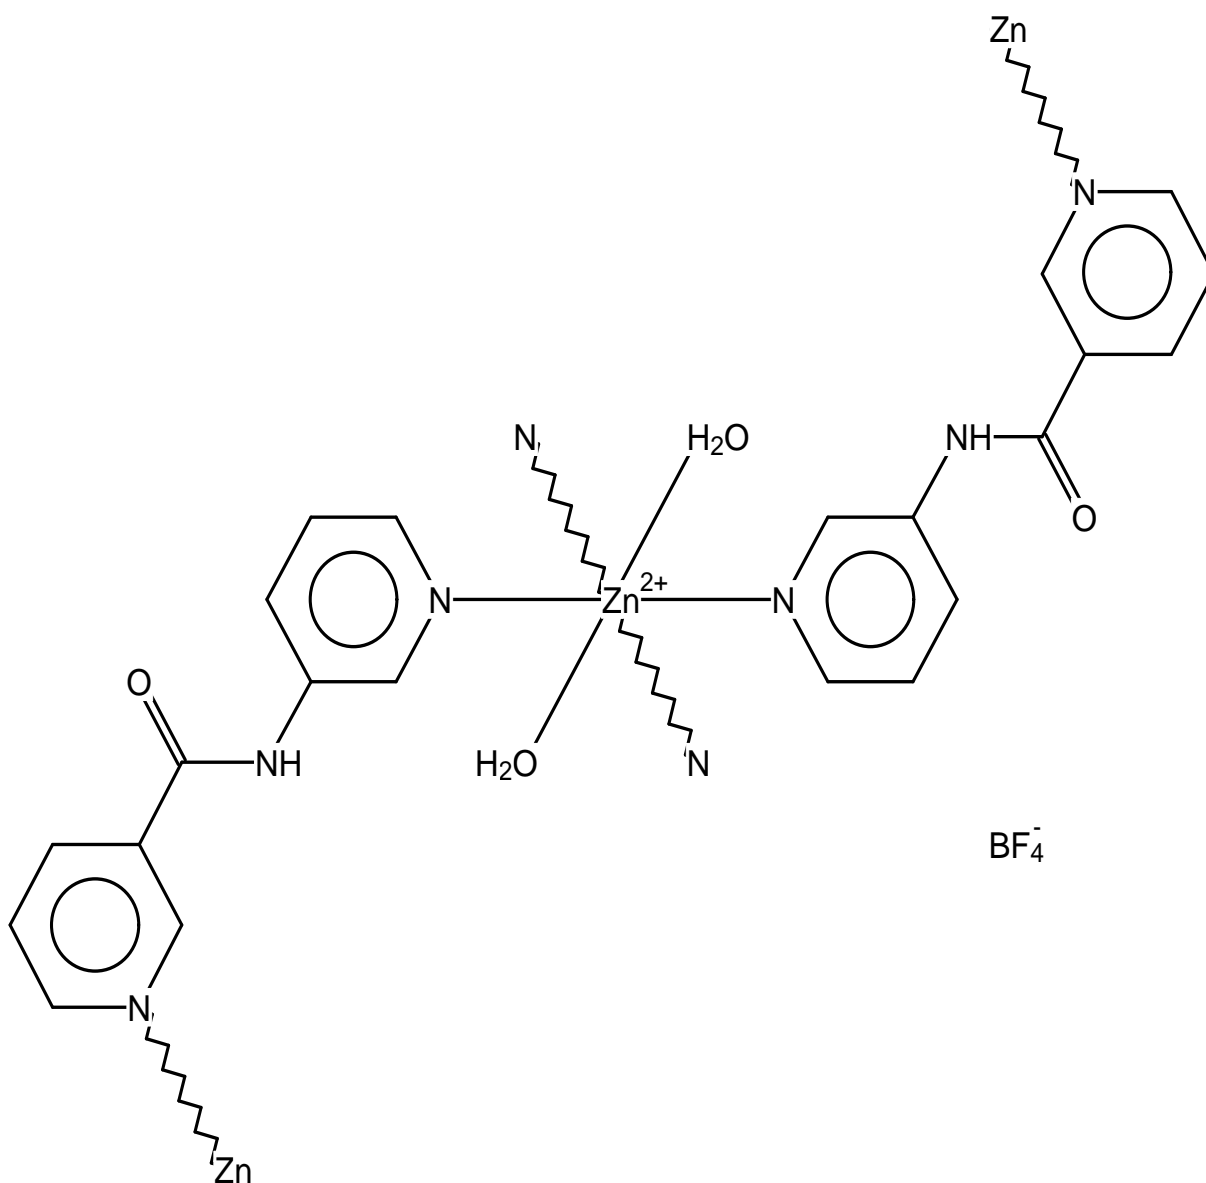

## Search: search7 (Thu May 26 10:20:13 2011): Hit 6

SIXVEB

**Reference:** D.K.Kumar, A.Das, P.Dastidar (2007) *CrystEngComm*, **9**, 548

**Formula:** (C<sub>11</sub> H<sub>9</sub> Cl<sub>2</sub> N<sub>3</sub> O<sub>1</sub> Zn<sub>1</sub>)<sub>n</sub>

**Compound Name:** catena-((μ<sub>2</sub>-N-(3-Pyridyl)nicotinamide-N',N'')-dichloro-zinc(ii))

**Space Group:** P21/c      **Cell:**      **a** 7.805(3)      **b** 13.773(6)      **c** 13.362(4)  
**Space Group No.:** 14      **(Å, °)**      **α** 90.00      **β** 119.81(1)      **γ** 90.00

**R-Factor (%):** 10.14      **Temperature(K):** 298      **Density(g/cm<sup>3</sup>):** 1.788

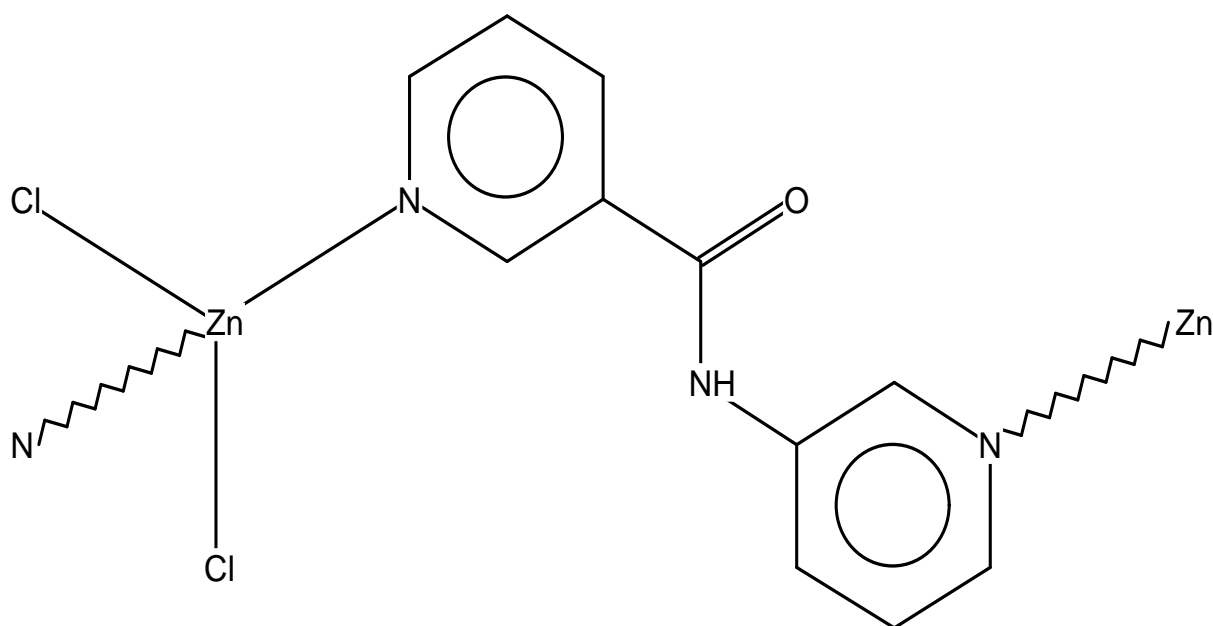

## Search: search7 (Thu May 26 10:20:13 2011): Hit 7

SIXVOL

**Reference:** D.K.Kumar, A.Das, P.Dastidar (2007) *CrystEngComm* ,9, 548

**Formula:** (C<sub>22</sub> H<sub>18</sub> Cd<sub>1</sub> N<sub>8</sub> O<sub>8</sub>)<sub>n</sub>,n(C<sub>6</sub> H<sub>5</sub> N<sub>1</sub> O<sub>2</sub>)

**Compound Name:** catena-(bis(μ<sub>2</sub>-N-(3-Pyridyl)nicotinamide-N',N'')-bis(nitrato-O)-cadmium(ii) nitrobenzene clathrate)

**Space Group:** P21/c      **Cell:**      **a** 10.281(1)      **b** 22.399(2)      **c** 15.244(1)  
**Space Group No.:** 14      **(Å, °)**      **α** 90.00      **β** 124.86(0)      **γ** 90.00

**R-Factor (%):** 8.71      **Temperature(K):** 100      **Density(g/cm<sup>3</sup>):** 1.748

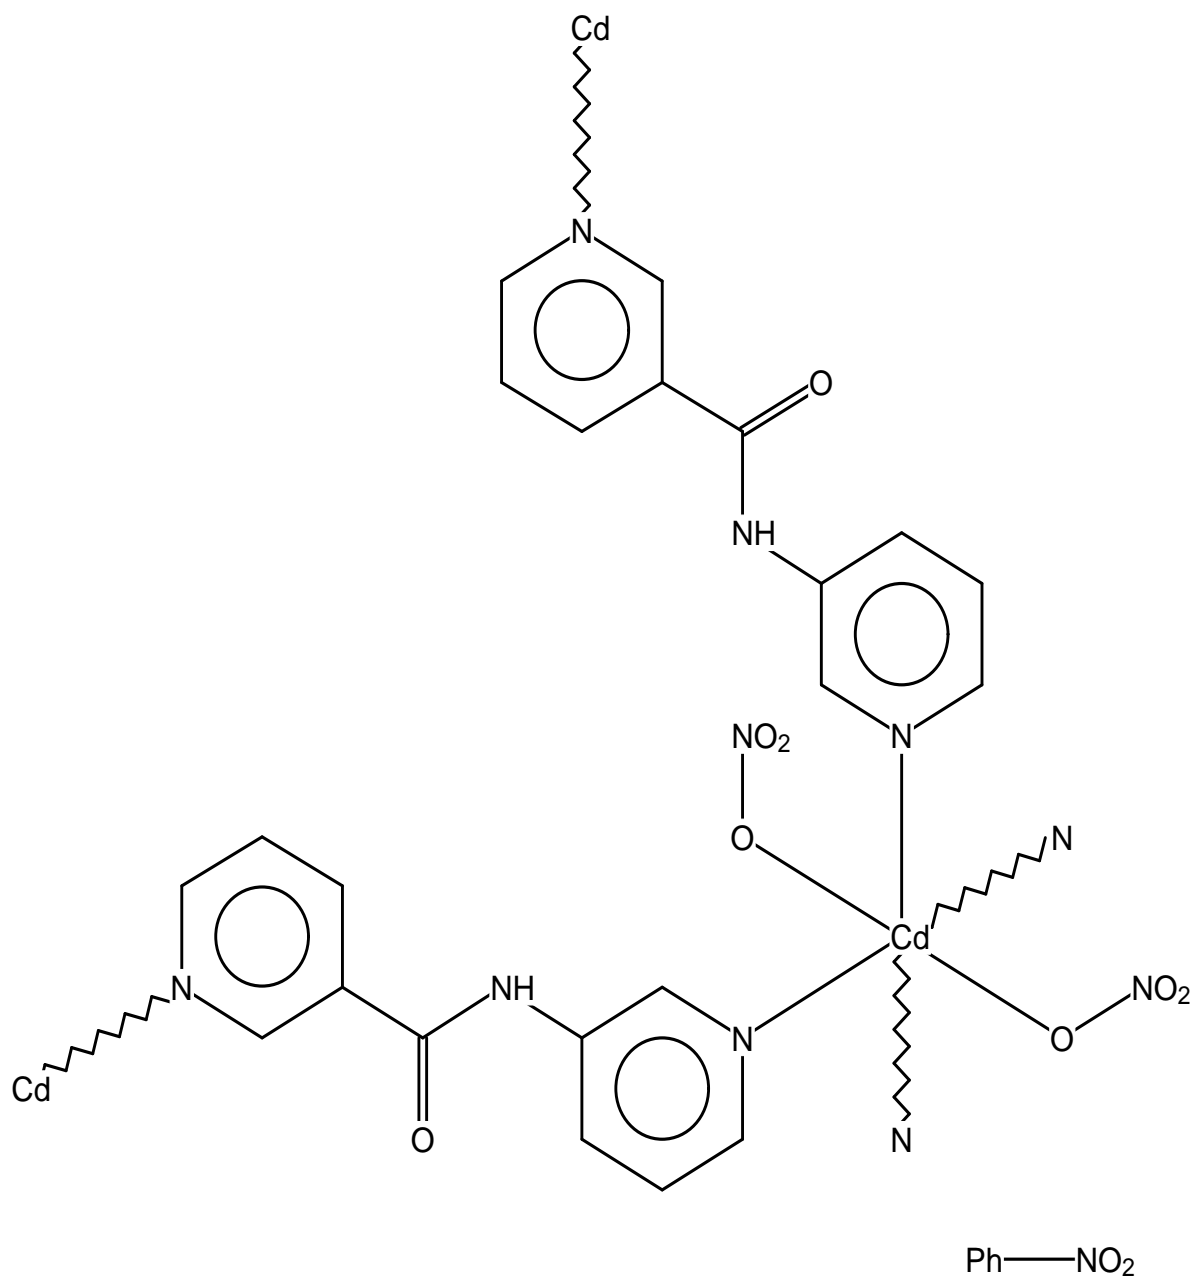

## Search: search7 (Thu May 26 10:20:13 2011): Hit 8

VIPTIY

**Reference:** D.K.Kumar, A.Das, P.Dastidar (2007) *CrystEngComm* ,9, 895

**Formula:**  $(C_{22} H_{34} Co_2 N_6 O_{10}^{4+})_n, 2n(C_4 H_2 O_4^{2-}), 4n(H_2 O_1)$

**Compound Name:** catena-(bis( $\mu_2$ -N-(3-Pyridyl)nicotinamide)-octaaqua-di-cobalt(ii) bis(fumarate) tetrahydrate)

**Space Group:** P21/c      **Cell:**      **a** 8.395(0)      **b** 15.806(1)      **c** 14.883(1)  
**Space Group No.:** 14      (**Å, °**)       $\alpha$  90.00       $\beta$  100.33(0)       $\gamma$  90.00

**R-Factor (%):** 5.31      **Temperature(K):** 100      **Density(g/cm<sup>3</sup>):** 1.642

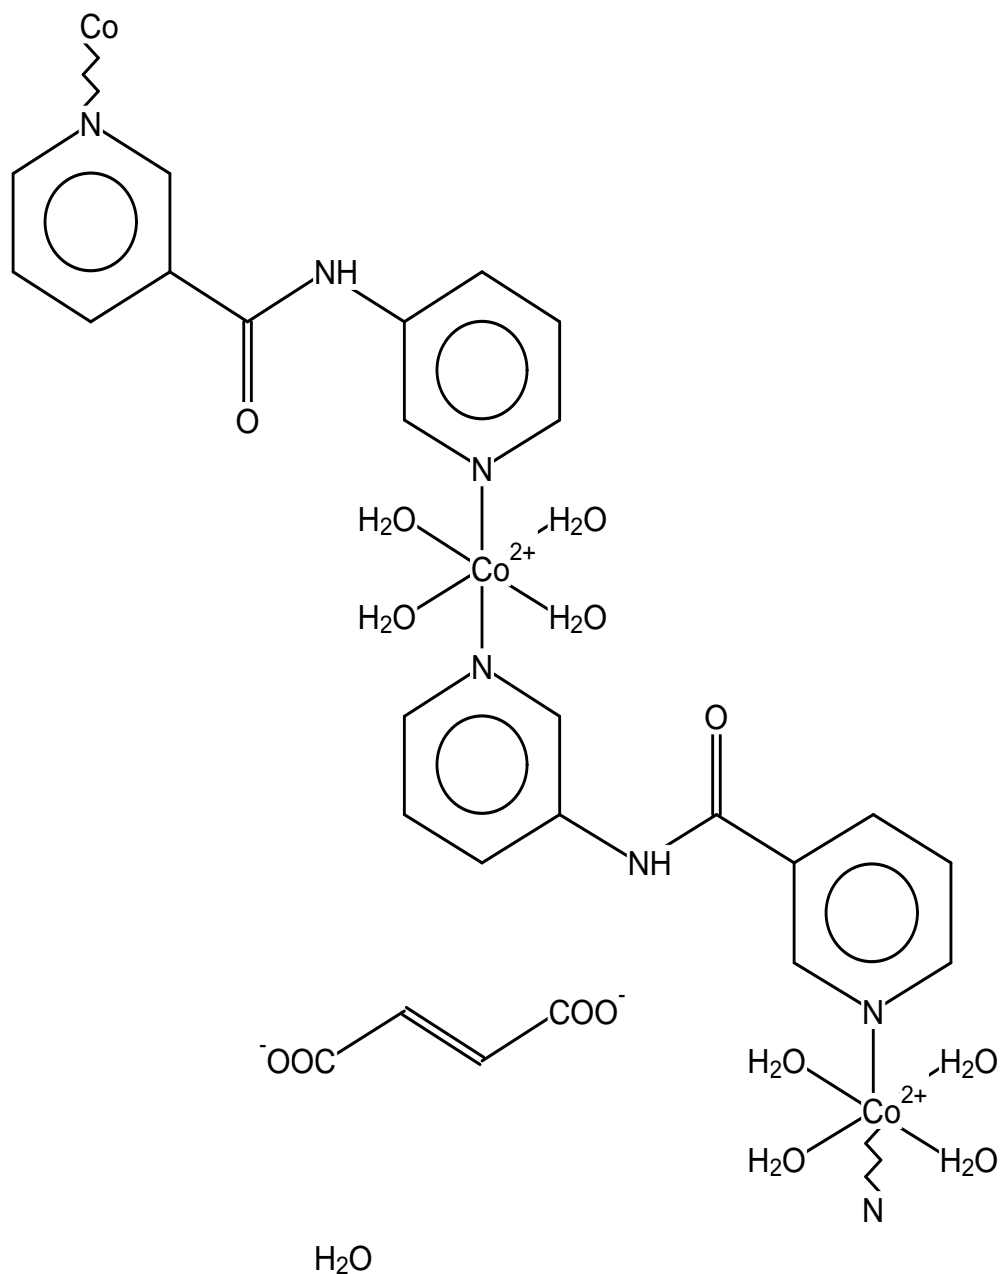

## Search: search7 (Thu May 26 10:20:13 2011): Hit 9

### VIPTOE

**Reference:** D.K.Kumar, A.Das, P.Dastidar (2007) *CrystEngComm*, **9**, 895

**Formula:**  $(C_{26} H_{32} Co_2 N_6 O_{12}^{2+})_n, n(C_4 H_2 O_4^{2-}), 4n(H_2 O_1)$

**Compound Name:** catena-(bis( $\mu_2$ -N-(3-Pyridyl)nicotinamide)-( $\mu_2$ -fumarato)-hexaaqua-dicobalt(ii) fumarate tetrahydrate)

**Space Group:** P-1      **Cell:**      **a** 8.836(1)      **b** 10.421(1)      **c** 10.856(1)  
**Space Group No.:** 2      (**Å, °**)       $\alpha$  78.77(0)       $\beta$  75.25(0)       $\gamma$  68.71(0)

**R-Factor (%):** 6.50      **Temperature(K):** 100      **Density(g/cm<sup>3</sup>):** 1.716

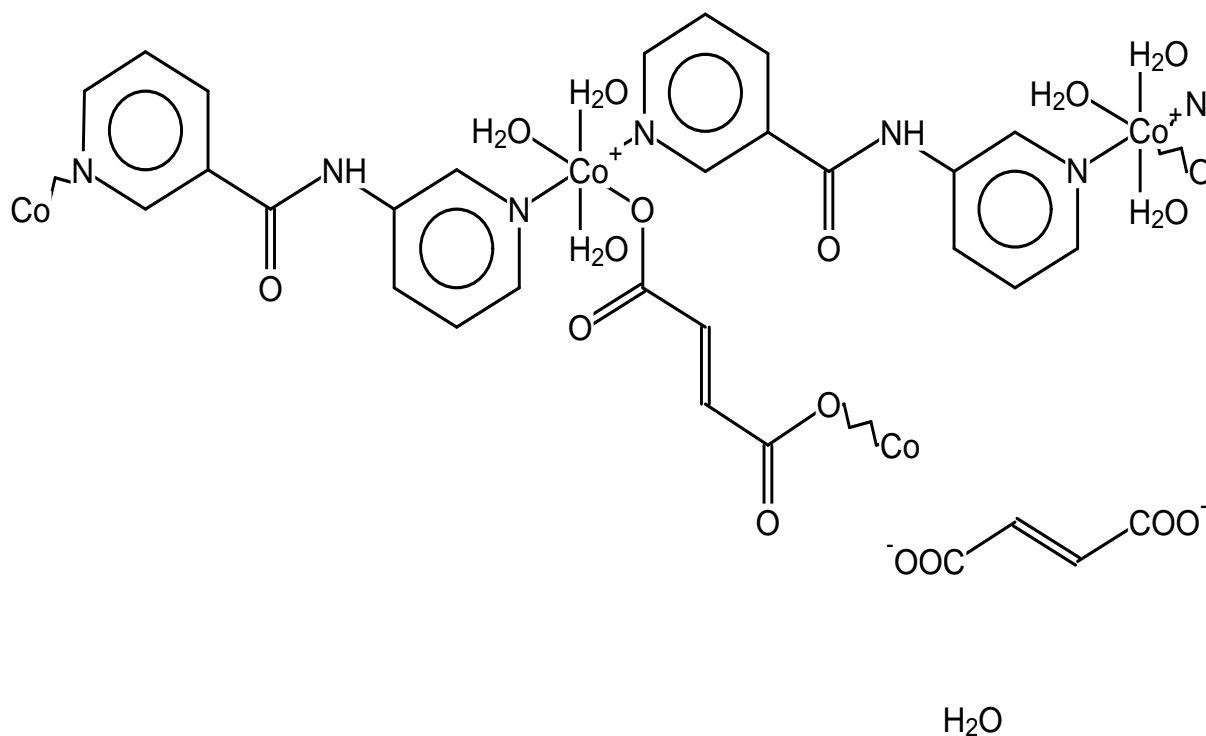

## Search Overview

**Search:** search10  
**Date/Time done:** Thu May 26 10:24:54 2011  
**Database(s):** CSD version 5.32 (November 2010)  
CSD version 5.32 updates (Nov 2010)  
**Restriction Info:** No refcode restrictions applied  
**Filters:** None  
**Percentage Completed:** 100%  
**Number of Hits:** 5

*Summary of queries used. Search found structures that:*

match

**Query 1**

**Query 2**

**Query 1**

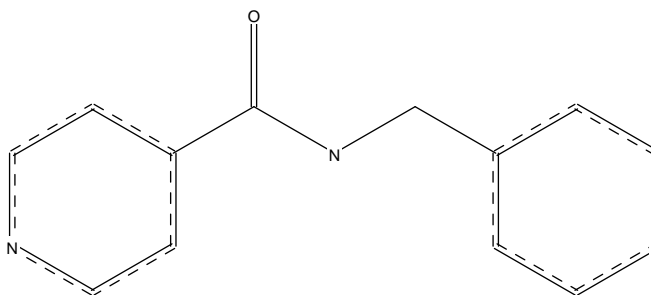

**Query 2**

4M

## Search: search10 (Thu May 26 10:24:54 2011): Hit 1

KIWPUC

**Reference:** Yu-Tao Ma, Bai-Wang Sun, S.W.Ng (2008)  
*Acta Crystallogr., Sect. E: Struct. Rep. Online* ,**64**,m470

**Formula:** (C<sub>12</sub> H<sub>11</sub> Ag<sub>1</sub> N<sub>3</sub> O<sub>1</sub><sup>1+</sup>)<sub>n</sub>,n(N<sub>1</sub> O<sub>3</sub><sup>1-</sup>),n(H<sub>2</sub> O<sub>1</sub>)

**Compound Name:** catena-((μ<sub>2</sub>-N-(4-Pyridylmethyl)pyridine-4-carboxamide-κ<sup>2</sup>N:N')-silver(i) nitrate monohydrate)

**Space Group:** Pbc<sub>a</sub>      **Cell:**      **a** 12.912(7)      **b** 9.021(5)      **c** 24.520(10)  
**Space Group No.:** 61      **(Å, °)**      α 90.00      β 90.00      γ 90.00

**R-Factor (%):** 5.26      **Temperature(K):** 295      **Density(g/cm<sup>3</sup>):** 1.866

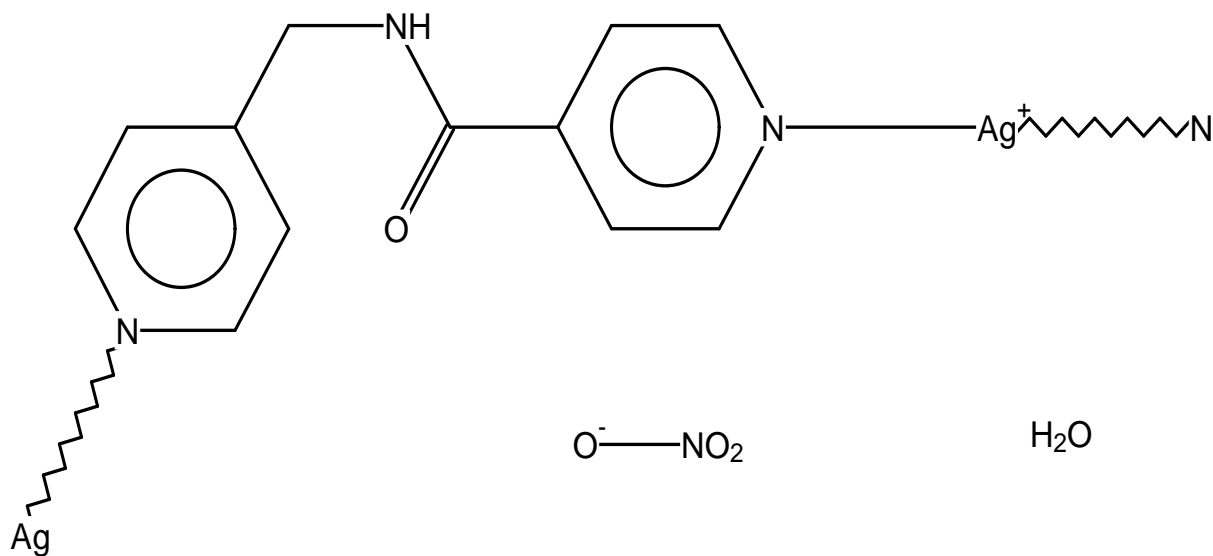



## Search: search10 (Thu May 26 10:24:54 2011): Hit 2

KIWPUC01

**Reference:** K.Uemura, Y.Kumamoto, S.Kitagawa (2008)  
*Chem.-Eur.J.* ,**14**,9565

**Formula:** (C<sub>12</sub> H<sub>11</sub> Ag<sub>1</sub> N<sub>3</sub> O<sub>1</sub><sup>1+</sup>)<sub>n</sub>,n(N<sub>1</sub> O<sub>3</sub><sup>1-</sup>),n(H<sub>2</sub> O<sub>1</sub>)

**Compound Name:** catena-((μ<sub>2</sub>-N-((Pyridin-4-yl)methyl)pyridine-4-carboxamide-N,N')-silver(i) nitrate monohydrate)

**Synonym:** catena-((μ<sub>2</sub>-N-((Pyridin-4-yl)methyl)isonicotinamide-N,N')-silver(i) nitrate monohydrate)

**Space Group:** Pbc<sub>a</sub>      **Cell:**      **a** 12.903(5)      **b** 9.022(4)      **c** 24.540(10)  
**Space Group No.:** 61      **(Å, °)**      α 90.00      β 90.00      γ 90.00

**R-Factor (%):** 4.77      **Temperature(K):** 293      **Density(g/cm<sup>3</sup>):** 1.865

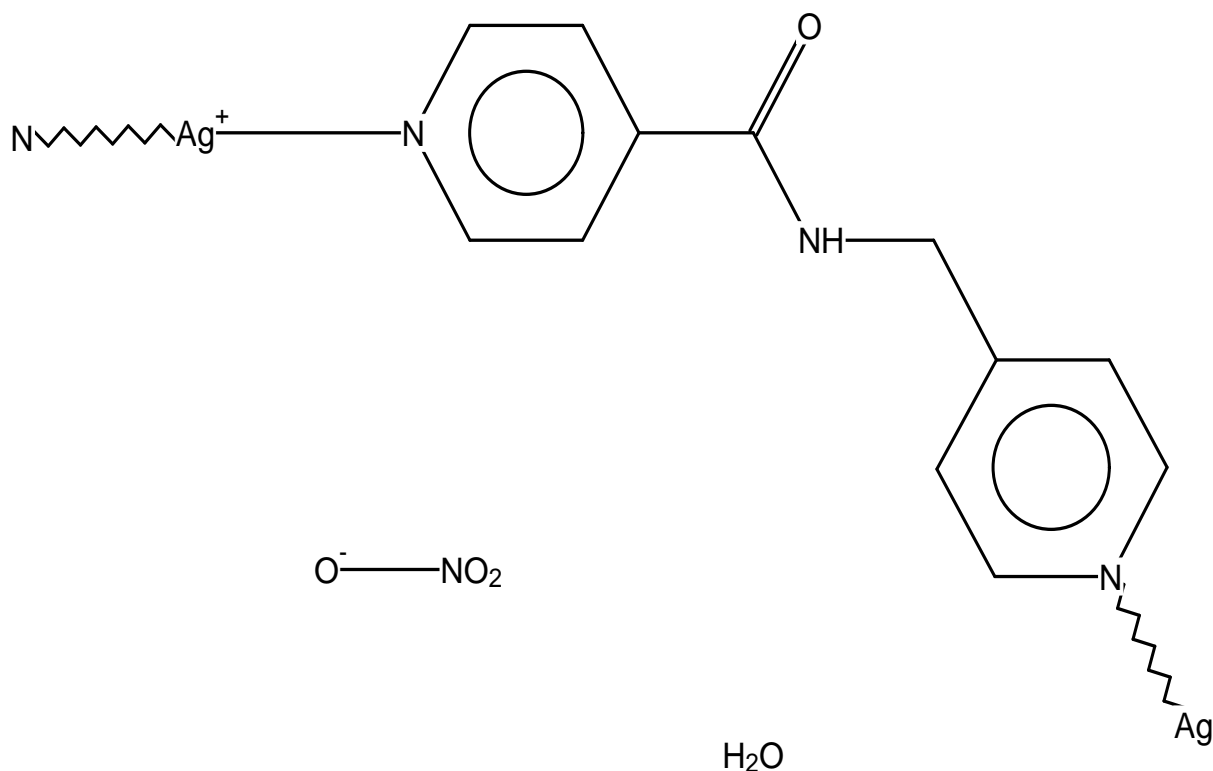

## Search: search10 (Thu May 26 10:24:54 2011): Hit 3

### POJZOE

**Reference:** K.Uemura, Y.Kumamoto, S.Kitagawa (2008)  
*Chem.-Eur.J.* ,**14**,9565

**Formula:** (C<sub>12</sub> H<sub>11</sub> Ag<sub>1</sub> N<sub>3</sub> O<sub>1</sub> 1<sup>+</sup>)<sub>n</sub>,n(F<sub>6</sub> P<sub>1</sub> 1<sup>-</sup>)

**Compound Name:** catena-((μ<sub>2</sub>-N-((Pyridin-4-yl)methyl)pyridine-4-carboxamide-N,N')-silver(i) hexafluorophosphate)

**Synonym:** catena-((μ<sub>2</sub>-N-((Pyridin-4-yl)methyl)isonicotinamide-N,N')-silver(i) hexafluorophosphate)

**Space Group:** P21/n      **Cell:**      **a** 9.704(4)      **b** 25.400(10)      **c** 12.458(5)  
**Space Group No.:** 14      **(Å, °)**      **α** 90.00      **β** 94.89(0)      **γ** 90.00

**R-Factor (%):** 7.08      **Temperature(K):** 293      **Density(g/cm<sup>3</sup>):** 2.024

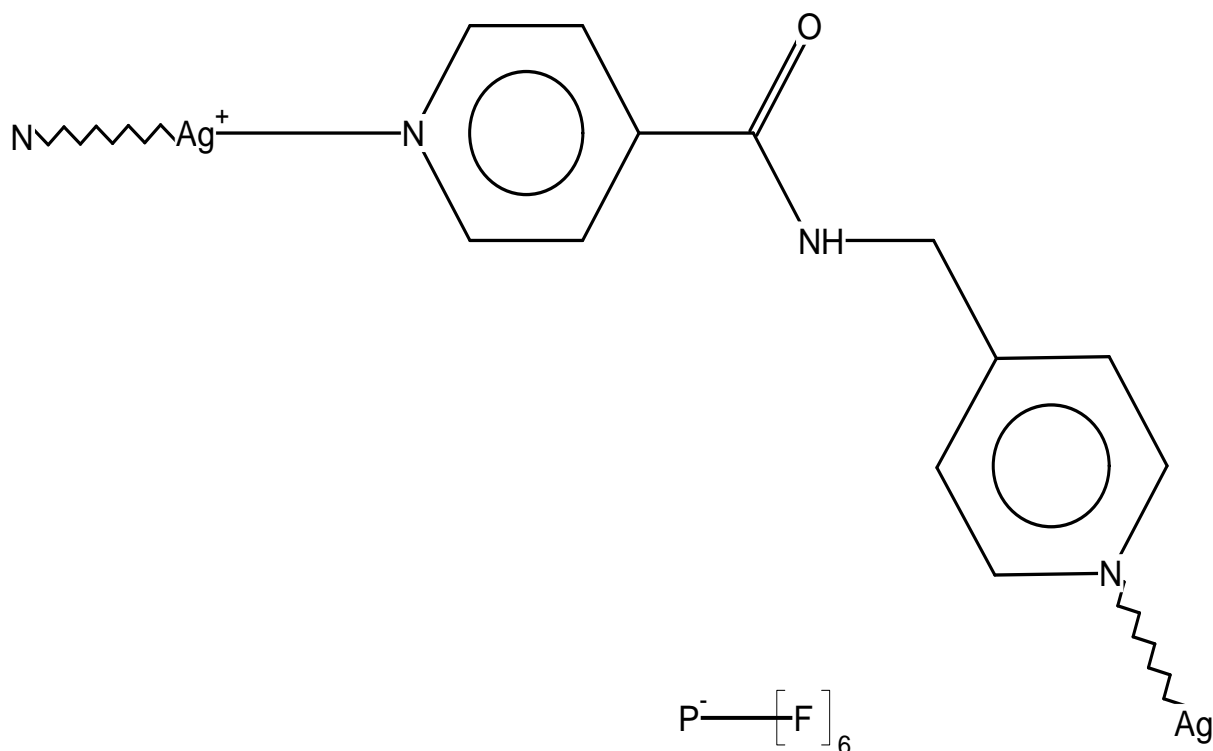

## Search: search10 (Thu May 26 10:24:54 2011): Hit 4

### POJZUK

**Reference:** K.Uemura, Y.Kumamoto, S.Kitagawa (2008)  
*Chem.-Eur.J.* ,**14**,9565

**Formula:** (C<sub>12</sub> H<sub>11</sub> Ag<sub>1</sub> N<sub>3</sub> O<sub>1</sub><sup>1+</sup>)<sub>n</sub>,n(Cl<sub>1</sub> O<sub>4</sub><sup>1-</sup>)<sub>n</sub>(H<sub>2</sub> O<sub>1</sub>)

**Compound Name:** catena-((μ<sub>2</sub>-N-((Pyridin-4-yl)methyl)pyridine-4-carboxamide-N,N')-silver(i) perchlorate monohydrate)

**Synonym:** catena-((μ<sub>2</sub>-N-((Pyridin-4-yl)methyl)isonicotinamide-N,N')-silver(i) perchlorate monohydrate)

**Space Group:** Pbc<sub>a</sub>      **Cell:**      **a** 13.409(0)      **b** 9.383(0)      **c** 25.048(1)  
**Space Group No.:** 61      **(Å, °)**      α 90.00      β 90.00      γ 90.00

**R-Factor (%):** 6.87      **Temperature(K):** 293      **Density(g/cm<sup>3</sup>):** 1.849

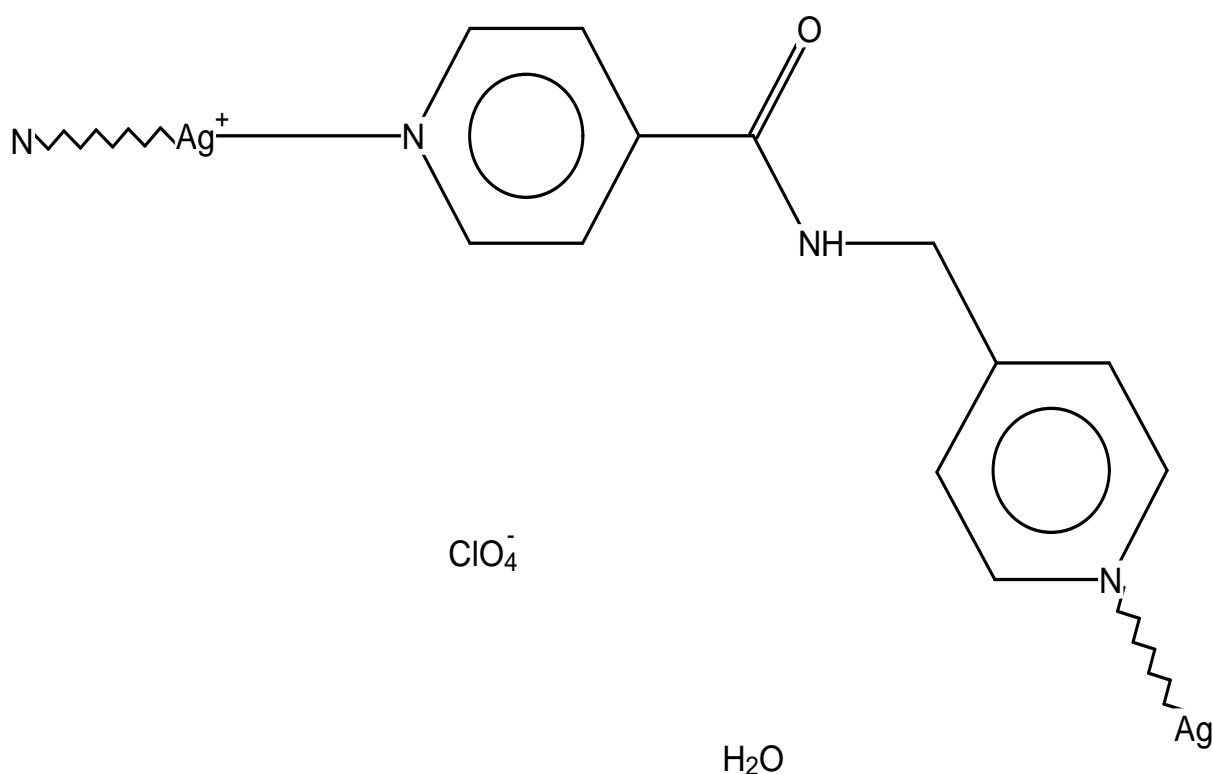

## Search: search10 (Thu May 26 10:24:54 2011): Hit 5

### UGOREN

**Reference:** Ming-Liang Tong, Yin-Miao Wu, Jie Ru, Xiao-Ming Chen, Ho-Chol Chang, S.Kitagawa (2002) *Inorg.Chem.* ,**41**,4846

**Formula:** (C<sub>26</sub> H<sub>22</sub> Ag<sub>2</sub> N<sub>6</sub> O<sub>6</sub>)<sub>n</sub>,9n(H<sub>2</sub> O<sub>1</sub>)

**Compound Name:** catena-((μ<sub>2</sub>-Oxalato)-bis(μ<sub>2</sub>-N-((pyrid-4-yl)methyl)pyridine-4-carboxamide-N',N''))-di-silver(i) nonahydrate

|                         |      |                        |                    |                                   |                    |
|-------------------------|------|------------------------|--------------------|-----------------------------------|--------------------|
| <b>Space Group:</b>     | C2/c | <b>Cell:</b>           | <b>a</b> 28.947(8) | <b>b</b> 8.617(3)                 | <b>c</b> 16.307(6) |
| <b>Space Group No.:</b> | 15   | <b>(Å, °)</b>          | <b>α</b> 90.00     | <b>β</b> 121.07(1)                | <b>γ</b> 90.00     |
| <b>R-Factor (%):</b>    | 5.13 | <b>Temperature(K):</b> | 293                | <b>Density(g/cm<sup>3</sup>):</b> | 1.701              |

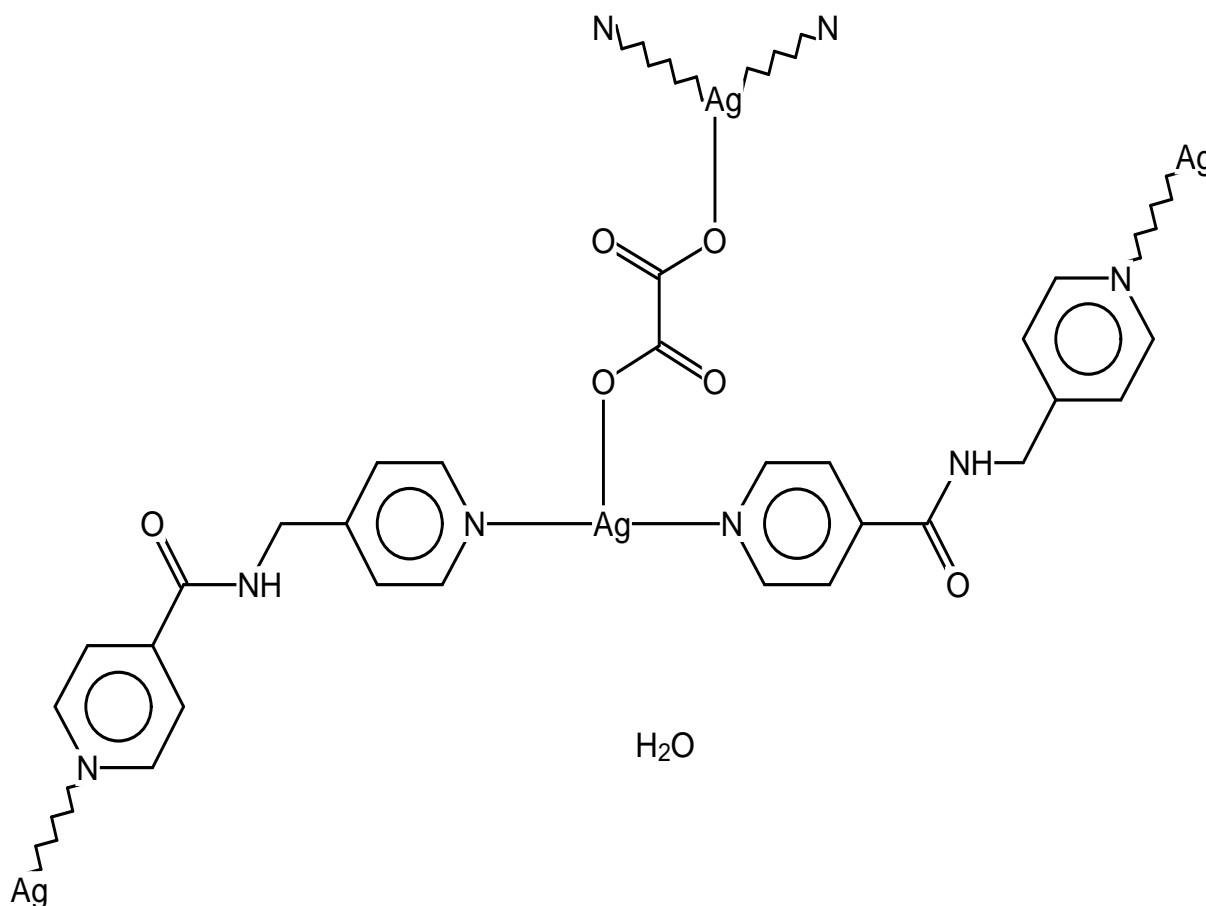

## Search Overview

**Search:** search11  
**Date/Time done:** Thu May 26 10:26:24 2011  
**Database(s):** CSD version 5.32 (November 2010)  
CSD version 5.32 updates (Nov 2010)  
**Restriction Info:** No refcode restrictions applied  
**Filters:** None  
**Percentage Completed:** 100%  
**Number of Hits:** 5

*Summary of queries used. Search found structures that:*

match

**Query 1**

**Query 2**

**Query 1**

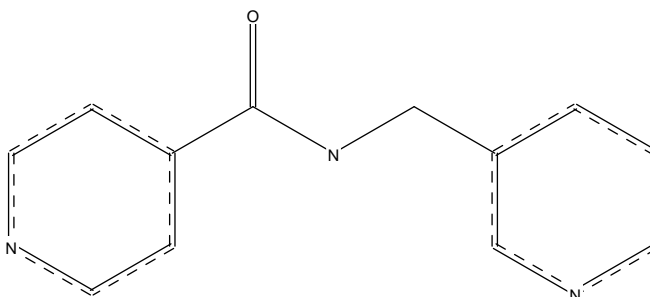

**Query 2**

4M

## Search: search11 (Thu May 26 10:26:24 2011): Hit 1

### POKBAT

**Reference:** K.Uemura, Y.Kumamoto, S.Kitagawa (2008)  
*Chem.-Eur.J.* ,**14**,9565

**Formula:** (C<sub>12</sub> H<sub>11</sub> Ag<sub>1</sub> N<sub>3</sub> O<sub>1</sub> 1<sup>+</sup>)<sub>n</sub>,n(F<sub>6</sub> P<sub>1</sub> 1<sup>-</sup>)

**Compound Name:** catena-((μ<sub>2</sub>-N-((Pyridin-3-yl)methyl)pyridine-4-carboxamide-N,N')-silver(i) hexafluorophosphate)

**Synonym:** catena-((μ<sub>2</sub>-N-((Pyridin-3-yl)methyl)isonicotinamide-N,N')-silver(i) hexafluorophosphate)

**Space Group:** P21/c      **Cell:**      **a** 8.501(1)      **b** 19.951(3)      **c** 9.622(0)

**Space Group No.:** 14      **(Å, °)**      **α** 90.00      **β** 108.43(0)      **γ** 90.00

**R-Factor (%):** 5.28      **Temperature(K):** 293      **Density(g/cm<sup>3</sup>):** 2.000

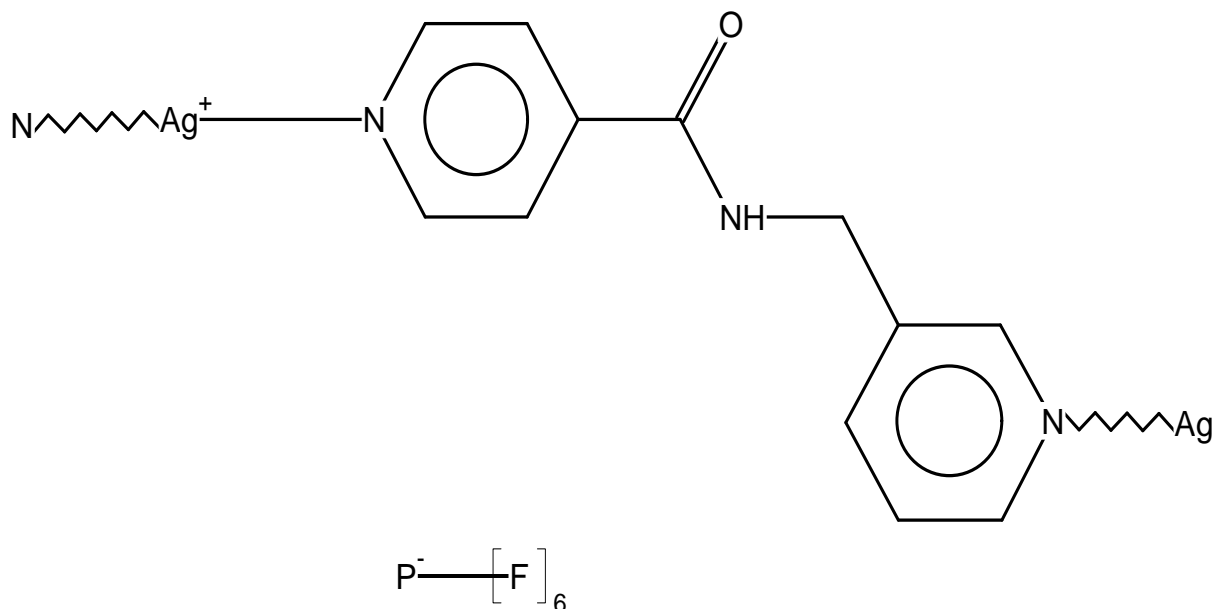

## Search: search11 (Thu May 26 10:26:24 2011): Hit 2

### POKBEX

**Reference:** K.Uemura, Y.Kumamoto, S.Kitagawa (2008)  
*Chem.-Eur.J.* ,**14**,9565

**Formula:** (C<sub>12</sub> H<sub>11</sub> Ag<sub>1</sub> N<sub>3</sub> O<sub>1</sub><sup>1+</sup>)<sub>n</sub>,n(Cl<sub>1</sub> O<sub>4</sub><sup>1-</sup>)

**Compound Name:** catena-((μ<sub>2</sub>-N-((Pyridin-3-yl)methyl)pyridine-4-carboxamide-N,N')-silver(i) perchlorate)

**Synonym:** catena-((μ<sub>2</sub>-N-((Pyridin-3-yl)methyl)isonicotinamide-N,N')-silver(i) perchlorate)

**Space Group:** P21/c      **Cell:**      **a** 8.489(0)      **b** 18.888(7)      **c** 9.227(2)  
**Space Group No.:** 14      **(Å, °)**      **α** 90.00      **β** 105.09(0)      **γ** 90.00

**R-Factor (%):** 3.88      **Temperature(K):** 293      **Density(g/cm<sup>3</sup>):** 1.955

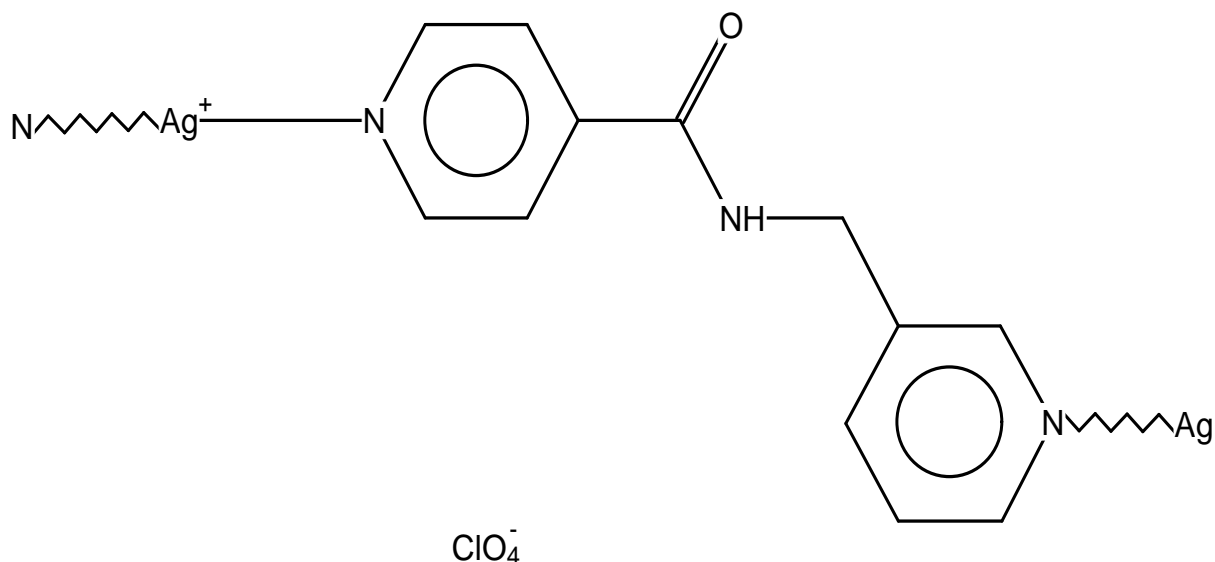

## Search: search11 (Thu May 26 10:26:24 2011): Hit 3

### POKBIB

**Reference:** K.Uemura, Y.Kumamoto, S.Kitagawa (2008)  
*Chem.-Eur.J.* ,**14**,9565

**Formula:** (C<sub>12</sub> H<sub>11</sub> Ag<sub>1</sub> N<sub>3</sub> O<sub>1</sub> 1<sup>+</sup>)<sub>n</sub>,n(B<sub>1</sub> F<sub>4</sub> 1<sup>-</sup>)

**Compound Name:** catena-((μ<sub>2</sub>-N-((Pyridin-3-yl)methyl)pyridine-4-carboxamide-N,N')-silver(i) tetrafluoroborate)

**Synonym:** catena-((μ<sub>2</sub>-N-((Pyridin-3-yl)methyl)isonicotinamide-N,N')-silver(i) tetrafluoroborate)

**Space Group:** P21/c      **Cell:**      **a** 8.514(4)      **b** 18.763(9)      **c** 9.071(4)

**Space Group No.:** 14      **(Å, °)**      **α** 90.00      **β** 104.63(0)      **γ** 90.00

**R-Factor (%):** 4.35      **Temperature(K):** 293      **Density(g/cm<sup>3</sup>):** 1.932

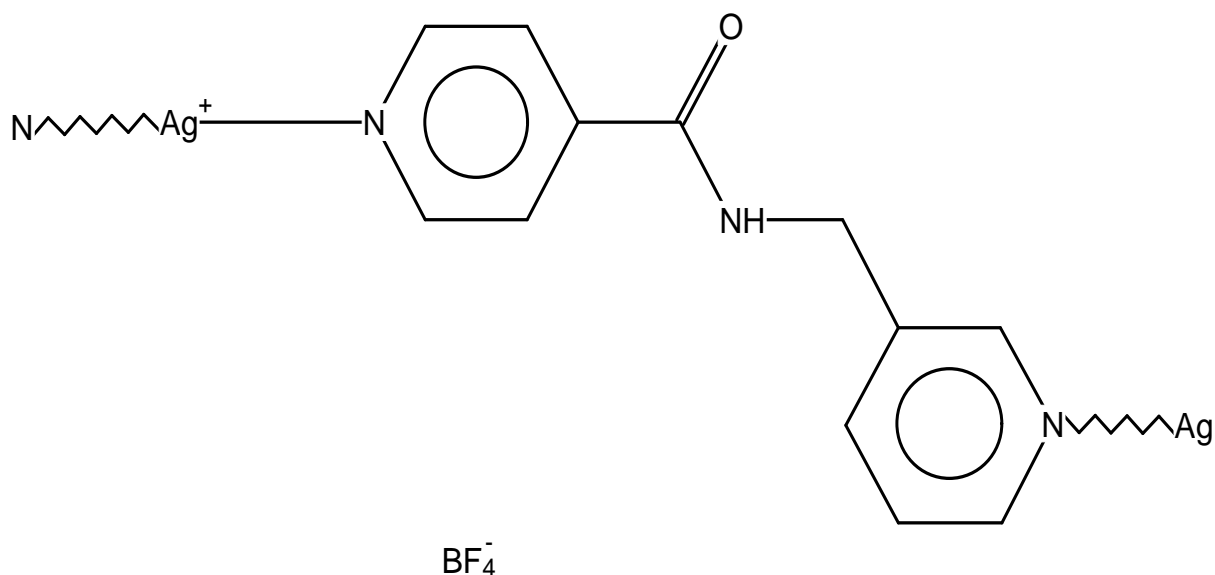



## Search: search11 (Thu May 26 10:26:24 2011): Hit 4

### RISNOX

**Reference:** Yu-Tao Ma, Qi-Hua Zhao (2008)  
*Acta Crystallogr., Sect. E: Struct. Rep. Online*, **64**, m110

**Formula:** (C<sub>12</sub> H<sub>11</sub> Ag<sub>1</sub> N<sub>3</sub> O<sub>1</sub><sup>1+</sup>)<sub>n</sub>, n(N<sub>1</sub> O<sub>3</sub><sup>1-</sup>), n(H<sub>2</sub> O<sub>1</sub>)

**Compound Name:** catena-((μ<sub>2</sub>-N-(3-Pyridylmethyl)pyridine-4-carboxamide)-silver(i) nitrate monohydrate)

**Space Group:** P21/c      **Cell:**      **a** 12.177(2)      **b** 13.022(3)      **c** 8.911(1)  
**Space Group No.:** 14      **(Å, °)**      **α** 90.00      **β** 94.21(3)      **γ** 90.00

**R-Factor (%):** 4.24      **Temperature(K):** 293      **Density(g/cm<sup>3</sup>):** 1.891

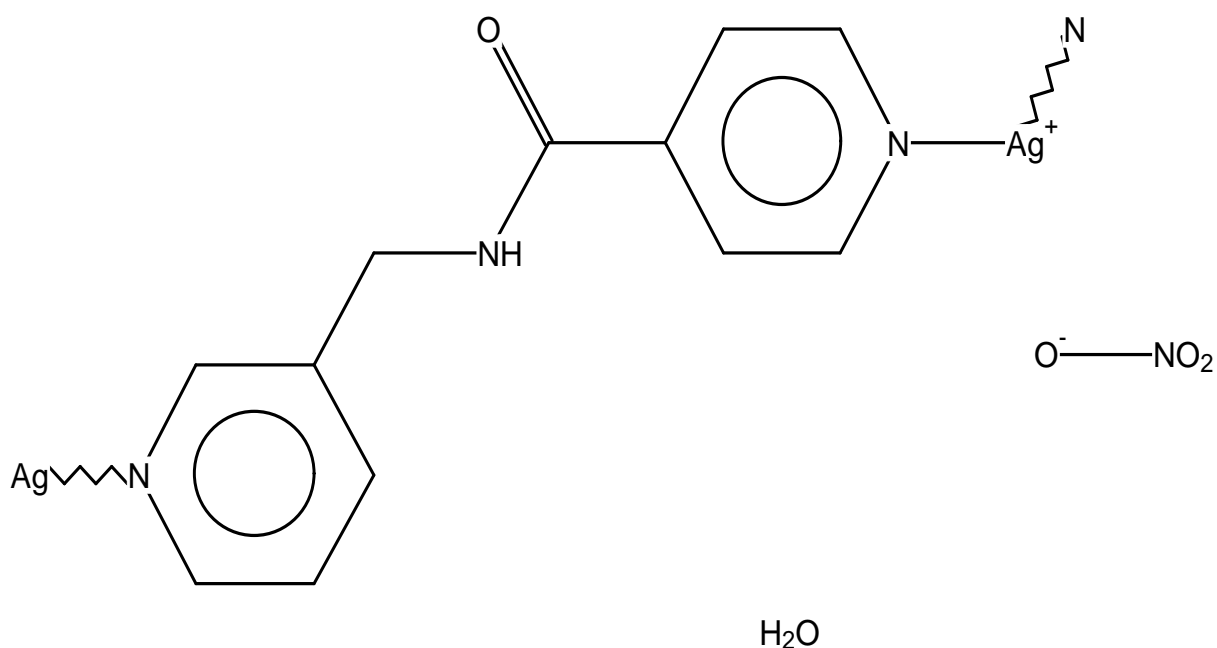

## Search: search11 (Thu May 26 10:26:24 2011): Hit 5

RISNOX01

**Reference:** K.Uemura, Y.Kumamoto, S.Kitagawa (2008)  
*Chem.-Eur.J.* ,**14**,9565

**Formula:** (C<sub>12</sub> H<sub>11</sub> Ag<sub>1</sub> N<sub>3</sub> O<sub>1</sub><sup>1+</sup>),n,n(N<sub>1</sub> O<sub>3</sub><sup>1-</sup>),n(H<sub>2</sub> O<sub>1</sub>)

**Compound Name:** catena-((μ<sub>2</sub>-N-((Pyridin-3-yl)methyl)pyridine-4-carboxamide-N,N')-silver(i) nitrate monohydrate)

**Synonym:** catena-((μ<sub>2</sub>-N-((Pyridin-3-yl)methyl)isonicotinamide-N,N')-silver(i) nitrate monohydrate)

**Space Group:** P21/a      **Cell:**      **a** 8.951(5)      **b** 13.049(7)      **c** 12.215(7)  
**Space Group No.:** 14      **(Å, °)**      **α** 90.00      **β** 94.21(0)      **γ** 90.00

**R-Factor (%):** 3.25      **Temperature(K):** 293      **Density(g/cm<sup>3</sup>):** 1.873

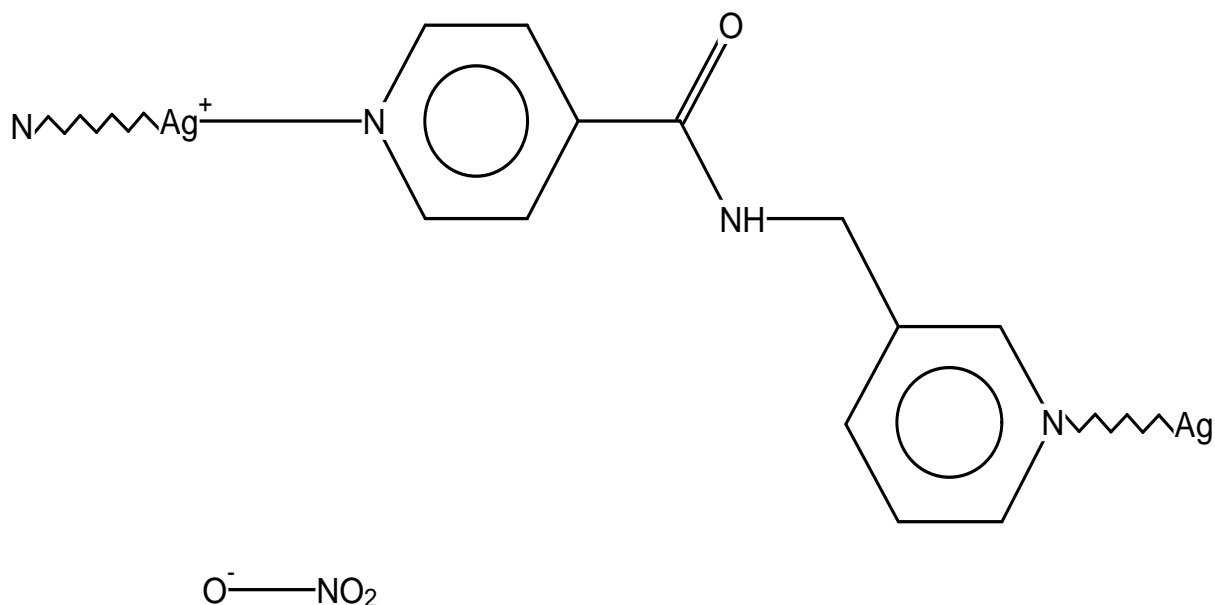

## Search Overview

**Search:** search12  
**Date/Time done:** Thu May 26 10:27:57 2011  
**Database(s):** CSD version 5.32 (November 2010)  
CSD version 5.32 updates (Nov 2010)  
**Restriction Info:** No refcode restrictions applied  
**Filters:** None  
**Percentage Completed:** 100%  
**Number of Hits:** 5

*Summary of queries used. Search found structures that:*

match

**Query 1**

**Query 2**

**Query 1**

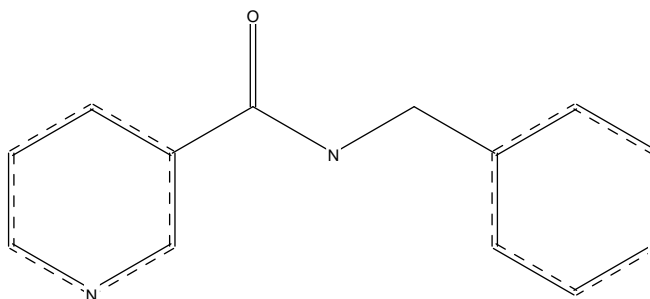

**Query 2**

4M

## Search: search12 (Thu May 26 10:27:57 2011): Hit 1

### HEVGEV

**Reference:** K.Uemura, K.Saito, S.Kitagawa, H.Kita (2006)  
*J.Am.Chem.Soc.* ,**128**,16122

**Formula:** (C<sub>24</sub> H<sub>22</sub> Cl<sub>2</sub> Co<sub>1</sub> N<sub>6</sub> O<sub>2</sub>)<sub>n</sub>

**Compound Name:** catena-(bis(μ<sub>2</sub>-N-(Pyrid-4-ylmethyl)nicotinamide-N',N'')-dichloro-cobalt(ii))

**Space Group:** P-1      **Cell:**      **a** 7.899(7)      **b** 8.782(7)      **c** 8.980(8)  
**Space Group No.:** 2      **(Å, °)**      **α** 84.70(2)      **β** 81.32(2)      **γ** 82.50(2)

**R-Factor (%):** 4.10      **Temperature(K):** 293      **Density(g/cm<sup>3</sup>):** 1.517

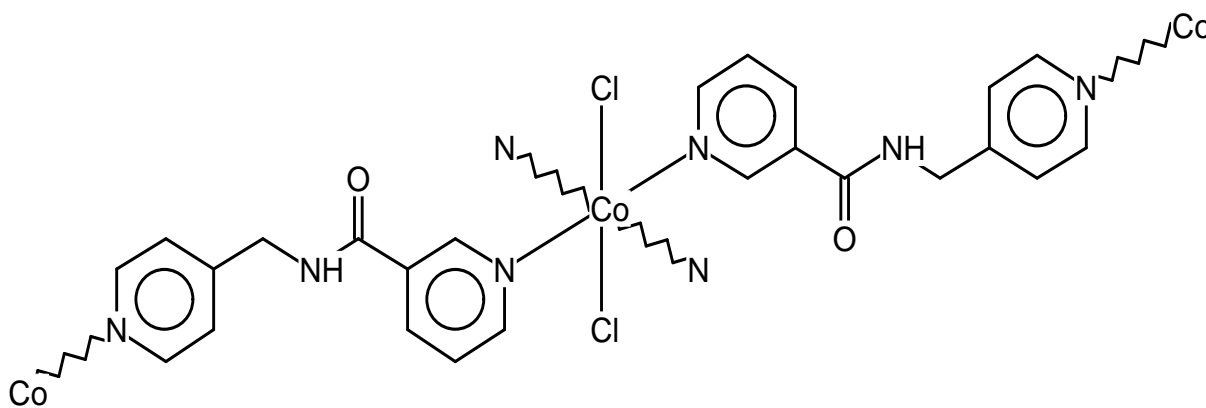

## Search: search12 (Thu May 26 10:27:57 2011): Hit 2

HEVGIZ

**Reference:** K.Uemura, K.Saito, S.Kitagawa, H.Kita (2006)  
*J.Am.Chem.Soc.* ,**128**,16122

**Formula:** (C<sub>26</sub> H<sub>22</sub> Co<sub>1</sub> N<sub>8</sub> O<sub>2</sub> S<sub>2</sub>)<sub>n</sub>,2n(C<sub>3</sub> H<sub>6</sub> O<sub>1</sub>)

**Compound Name:** catena-(bis(μ<sub>2</sub>-N-(Pyrid-4-ylmethyl)nicotinamide-N',N'')-bis(isothiocyanato-N)-cobalt(ii) bis(acetone) clathrate)

|                         |       |                        |                    |                                   |                    |
|-------------------------|-------|------------------------|--------------------|-----------------------------------|--------------------|
| <b>Space Group:</b>     | P21/n | <b>Cell:</b>           | <b>a</b> 11.371(2) | <b>b</b> 10.063(1)                | <b>c</b> 15.536(0) |
| <b>Space Group No.:</b> | 14    | <b>(Å, °)</b>          | <b>α</b> 90.00     | <b>β</b> 104.64(0)                | <b>γ</b> 90.00     |
| <b>R-Factor (%):</b>    | 6.52  | <b>Temperature(K):</b> | 293                | <b>Density(g/cm<sup>3</sup>):</b> | 1.386              |

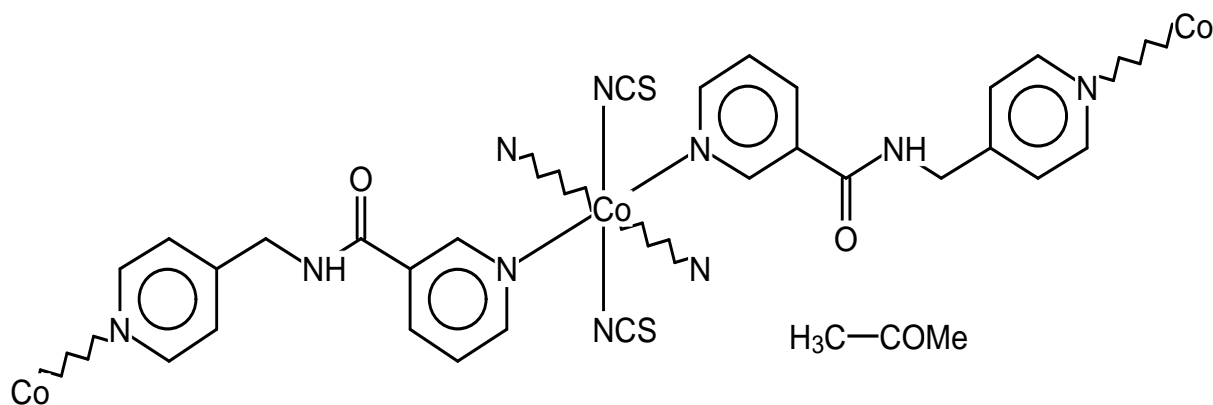

## Search: search12 (Thu May 26 10:27:57 2011): Hit 3

### HEVGOF

**Reference:** K.Uemura, K.Saito, S.Kitagawa, H.Kita (2006)  
*J.Am.Chem.Soc.* ,**128**,16122

**Formula:**  $(C_{24} H_{26} Co_1 N_6 O_4^{2+})_n, 2n(N_1 O_3^{1-}), 2n(C_1 H_4 O_1)$

**Compound Name:** catena-(bis( $\mu_2$ -N-(Pyrid-4-ylmethyl)nicotinamide-N',N'')-diaqua-cobalt(ii) dinitrate bis(methanol) clathrate)

**Space Group:** P-1      **Cell:**      **a** 8.072(0)      **b** 9.760(1)      **c** 11.260(1)  
**Space Group No.:** 2      (**Å, °**)       $\alpha$  107.24(0)       $\beta$  104.60(0)       $\gamma$  101.29(0)

**R-Factor (%):** 5.05      **Temperature(K):** 213      **Density(g/cm<sup>3</sup>):** 1.503

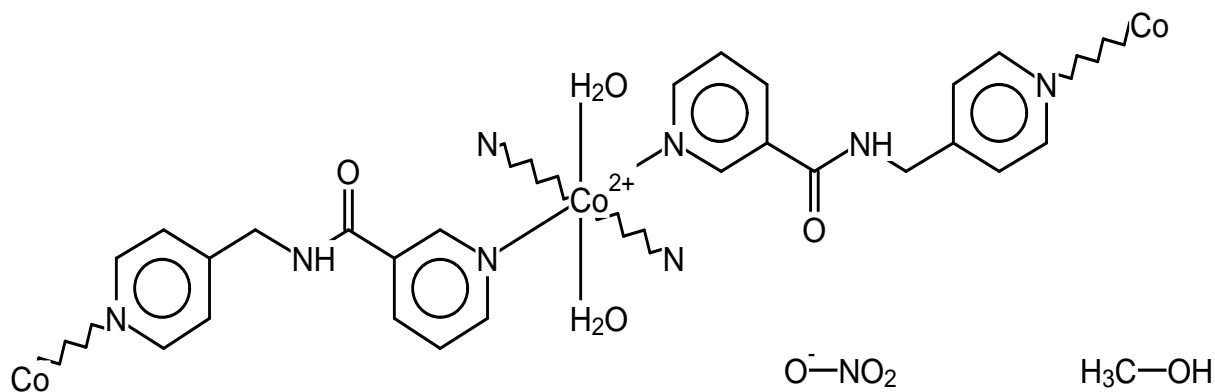

## Search: search12 (Thu May 26 10:27:57 2011): Hit 4

### POKBOH

**Reference:** K.Uemura, Y.Kumamoto, S.Kitagawa (2008)  
*Chem.-Eur.J.* ,**14**,9565

**Formula:** (C<sub>12</sub> H<sub>11</sub> Ag<sub>1</sub> N<sub>3</sub> O<sub>1</sub><sup>1+</sup>),n,n(F<sub>6</sub> P<sub>1</sub><sup>1-</sup>),n(C<sub>1</sub> H<sub>4</sub> O<sub>1</sub>)

**Compound Name:** catena-((μ<sub>2</sub>-N-((Pyridin-4-yl)methyl)pyridine-3-carboxamide-N,N')-silver hexafluorophosphate methanol solvate)

**Synonym:** catena-((μ<sub>2</sub>-N-((Pyridin-4-yl)methyl)nicotinamide-N,N')-silver(i) hexafluorophosphate methanol solvate)

**Space Group:** P43      **Cell:**      **a** 7.936(0)      **b** 7.936(0)      **c** 28.283(3)  
**Space Group No.:** 78      **(Å, °)**      α 90.00      β 90.00      γ 90.00

**R-Factor (%):** 7.32      **Temperature(K):** 223      **Density(g/cm<sup>3</sup>):** 1.858

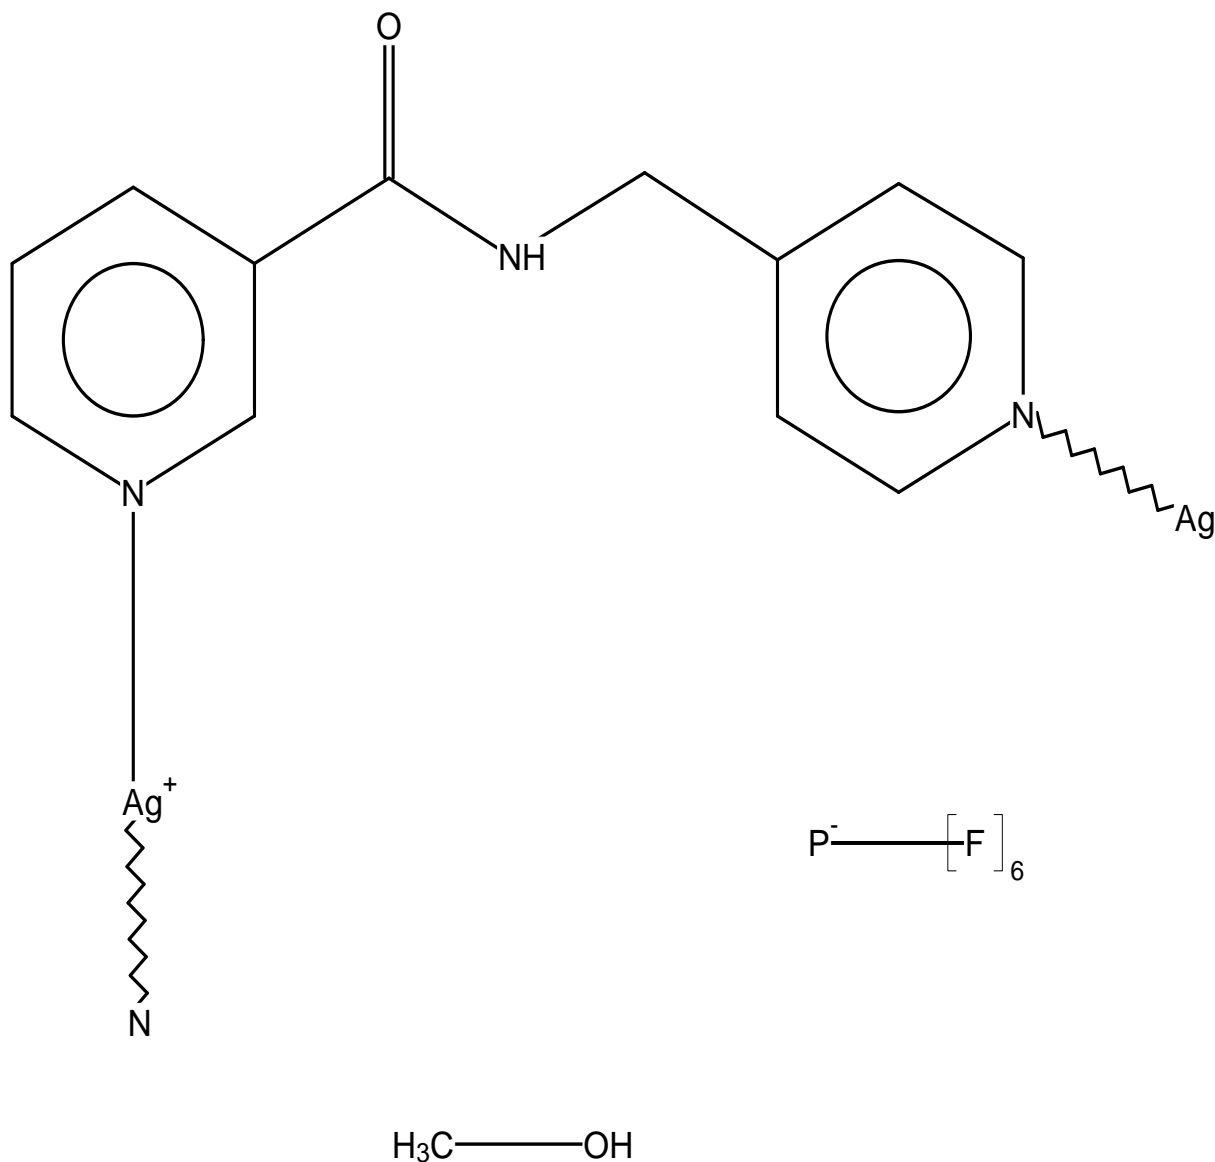

## Search: search12 (Thu May 26 10:27:57 2011): Hit 5

POKBOH01

**Reference:** K.Uemura, Y.Kumamoto, S.Kitagawa (2008)  
*Chem.-Eur.J.* ,**14**,9565

**Formula:** (C<sub>12</sub> H<sub>11</sub> Ag<sub>1</sub> N<sub>3</sub> O<sub>1</sub><sup>1+</sup>),n,n(F<sub>6</sub> P<sub>1</sub><sup>1-</sup>),n(C<sub>1</sub> H<sub>4</sub> O<sub>1</sub>)

**Compound Name:** catena-((μ<sub>2</sub>-N-((Pyridin-4-yl)methyl)pyridine-3-carboxamide-N,N')-silver hexafluorophosphate methanol solvate)

**Synonym:** catena-((μ<sub>2</sub>-N-((Pyridin-4-yl)methyl)nicotinamide-N,N')-silver(i) hexafluorophosphate methanol solvate)

**Space Group:** P41      **Cell:**      **a** 7.939(0)      **b** 7.939(0)      **c** 28.250(3)

**Space Group No.:** 76      **(Å, °)**      α 90.00      β 90.00      γ 90.00

**R-Factor (%)**: 8.02      **Temperature(K)**: 223      **Density(g/cm<sup>3</sup>)**: 1.858

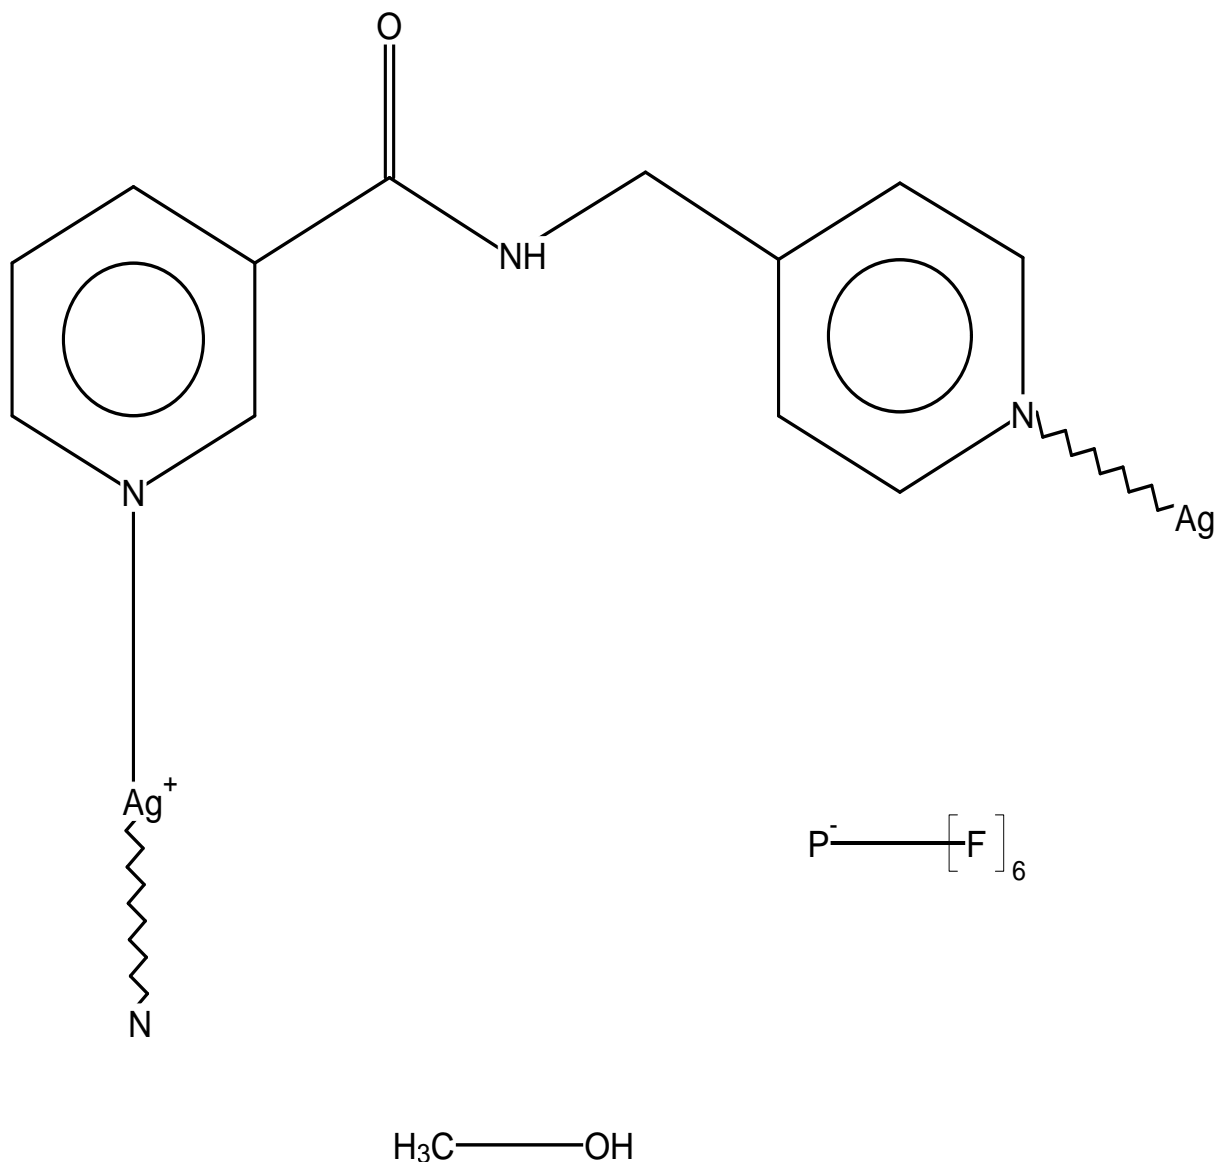



## Search Overview

**Search:** search21  
**Date/Time done:** Thu May 26 10:38:10 2011  
**Database(s):** CSD version 5.32 (November 2010)  
CSD version 5.32 updates (Nov 2010)  
**Restriction Info:** No refcode restrictions applied  
**Filters:** None  
**Percentage Completed:** 100%  
**Number of Hits:** 1

*Summary of queries used. Search found structures that:*

match

**Query 2**

**Query 3**

**Query 2**

4M

**Query 3**

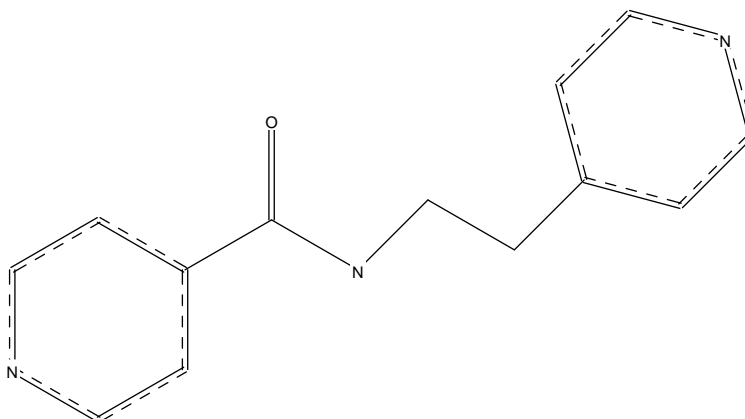

## Search: search21 (Thu May 26 10:38:10 2011): Hit 1

### AVUBIC

**Reference:** K.Uemura, S.Kitagawa, K.Fukui, K.Saito (2004)  
*J.Am.Chem.Soc.* ,**126**,3817

**Formula:** (C<sub>28</sub> H<sub>26</sub> Co<sub>1</sub> N<sub>8</sub> O<sub>2</sub> S<sub>2</sub>)<sub>n</sub>,4n(C<sub>3</sub> H<sub>6</sub> O<sub>1</sub>)

**Compound Name:** catena-(bis(μ<sub>2</sub>-N-(2-(Pyridin-4-yl)ethyl)isonicotinamide-N,N')-bis(isothiocyanato)-cobalt(ii) acetone solvate)

**Space Group:** P21/c      **Cell:**      **a** 11.115(3)      **b** 22.046(7)      **c** 9.717(3)  
**Space Group No.:** 14      **(Å, °)**      **α** 90.00      **β** 100.83(0)      **γ** 90.00

**R-Factor (%):** 8.32      **Temperature(K):** 293      **Density(g/cm<sup>3</sup>):** 1.224

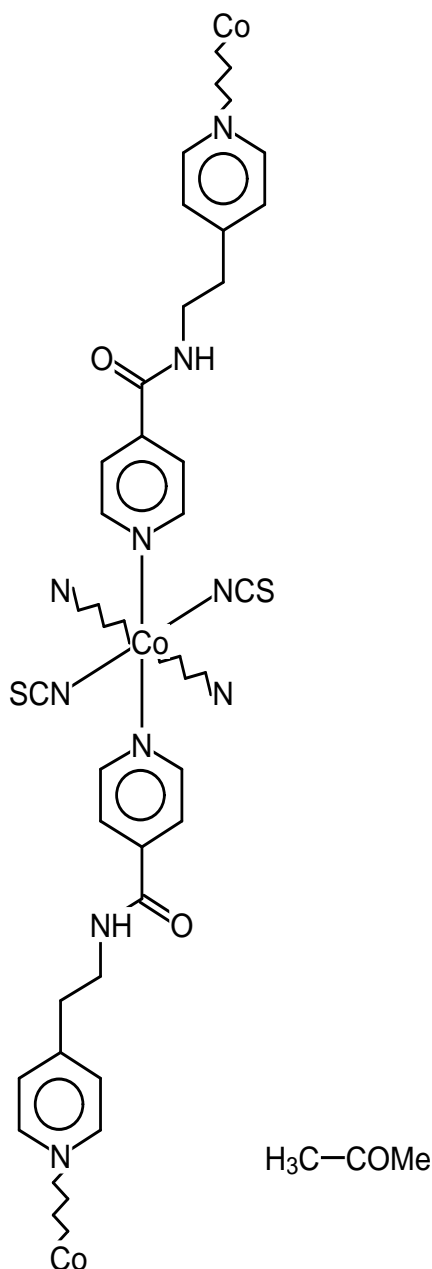

Supplement: c2cs15251g_1.pdf [file c2cs15251g_1.pdf]
