# Supplementary material for: Coordination polymers: what has been achieved in going from innocent 4,4′-bipyridine to bis-pyridyl ligands having a non-innocent backbone?
Source: Royal Society of Chemistry journal article supplement (doi:10.1039/c2cs15251g), 2012-01-01

## Search Overview

**Search:** search28  
**Date/Time done:** Thu May 26 10:48:21 2011  
**Database(s):** CSD version 5.32 (November 2010)  
CSD version 5.32 updates (Nov 2010)  
**Restriction Info:** No refcode restrictions applied  
**Filters:** None  
**Percentage Completed:** 100%  
**Number of Hits:** 4

*Summary of queries used. Search found structures that:*

match

**Query 2**

**Query 3**

**Query 2**

4M

**Query 3**

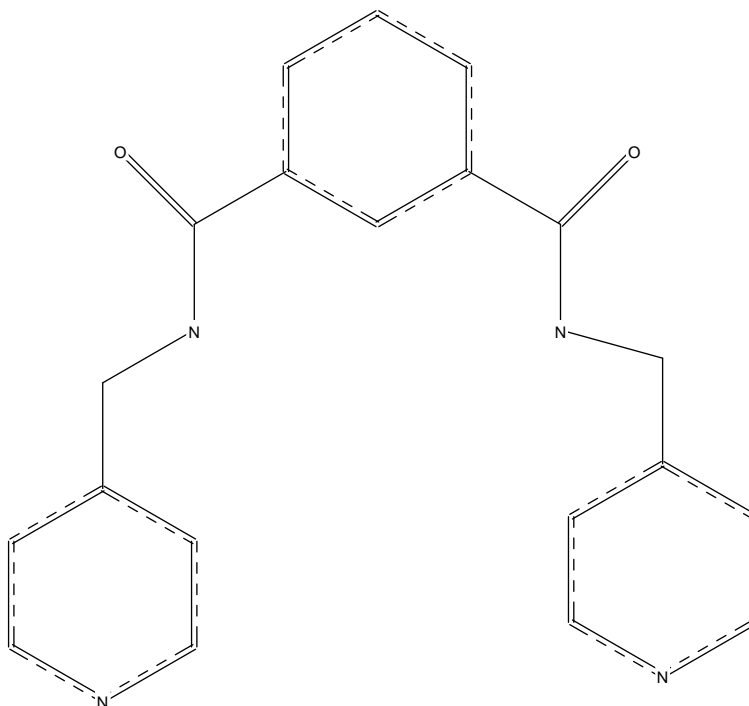

## Search: search28 (Thu May 26 10:48:21 2011): Hit 1

### DOQQAB

**Reference:** L.J.Barbour, G.W.Orr, J.L.Atwood (2000) *Chem. Commun.* , 859

**Formula:**  $C_{80} H_{80} Co_2 N_{16} O_{12}^{4+}, 4(N_1 O_3^{1-}), 12(H_2 O_1)$

**Compound Name:** tetrakis( $\mu_2$ -Benzene-1,3-bis(N-(4-pyridylmethyl)carboxamide))-tetra-aqua-di-cobalt(ii) tetranitrate dihydrate clathrate decahydrate

**Space Group:** C2/c      **Cell:**    **a** 21.886(1)    **b** 19.623(1)    **c** 22.170(1)  
**Space Group No.:** 15      (**Å, °**)     $\alpha$  90.00       $\beta$  90.89(0)     $\gamma$  90.00

**R-Factor (%):** 6.73      **Temperature(K):** 173      **Density(g/cm<sup>3</sup>):** 1.423

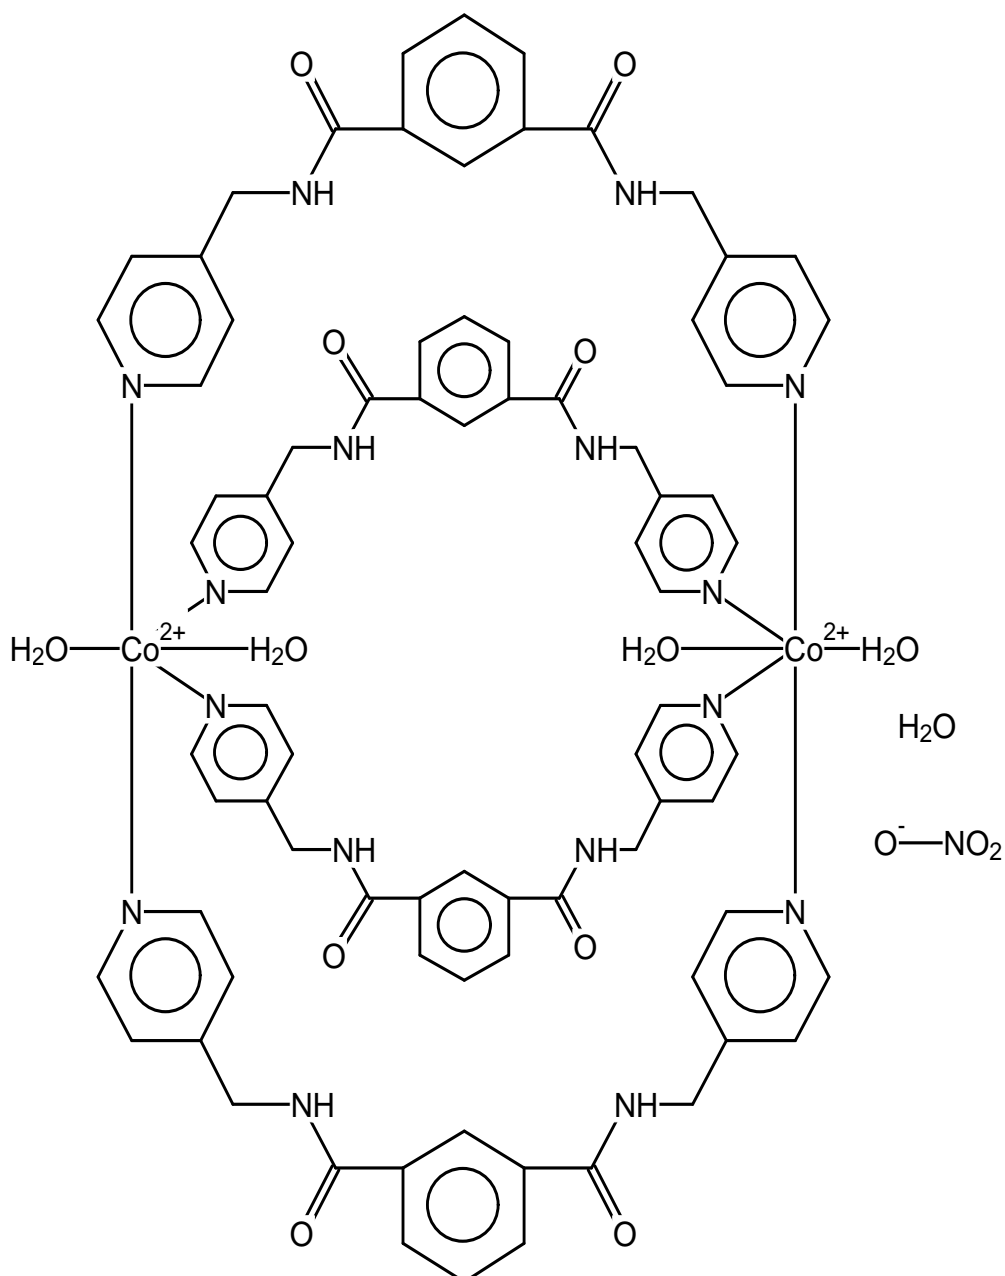



## Search: search28 (Thu May 26 10:48:21 2011): Hit 3

### NUGROW

**Reference:** L.J.Barbour, G.W.Orr, J.L.Atwood (1998) *Nature (London)*, **393**,671

**Formula:**  $C_{80} H_{80} Cu_2 N_{16} O_{12}^{4+}, 4(N_1 O_3^{1-}), 12(H_2 O_1)$

**Compound Name:** tetrakis( $\mu_2$ -Benzene-1,3-bis(N-4-pyridylmethyl)carbamoyl)-tetra-aqua-di-copper(ii) tetranitrate dodecahydrate

**Space Group:** I41/a      **Cell:**    **a** 21.927(0)    **b** 21.927(0)    **c** 39.754(2)  
**Space Group No.:** 88      **(Å, °)**     $\alpha$  90.00       $\beta$  90.00       $\gamma$  90.00

**R-Factor (%):** 9.62      **Temperature(K):** 295      **Density(g/cm<sup>3</sup>):** 1.424

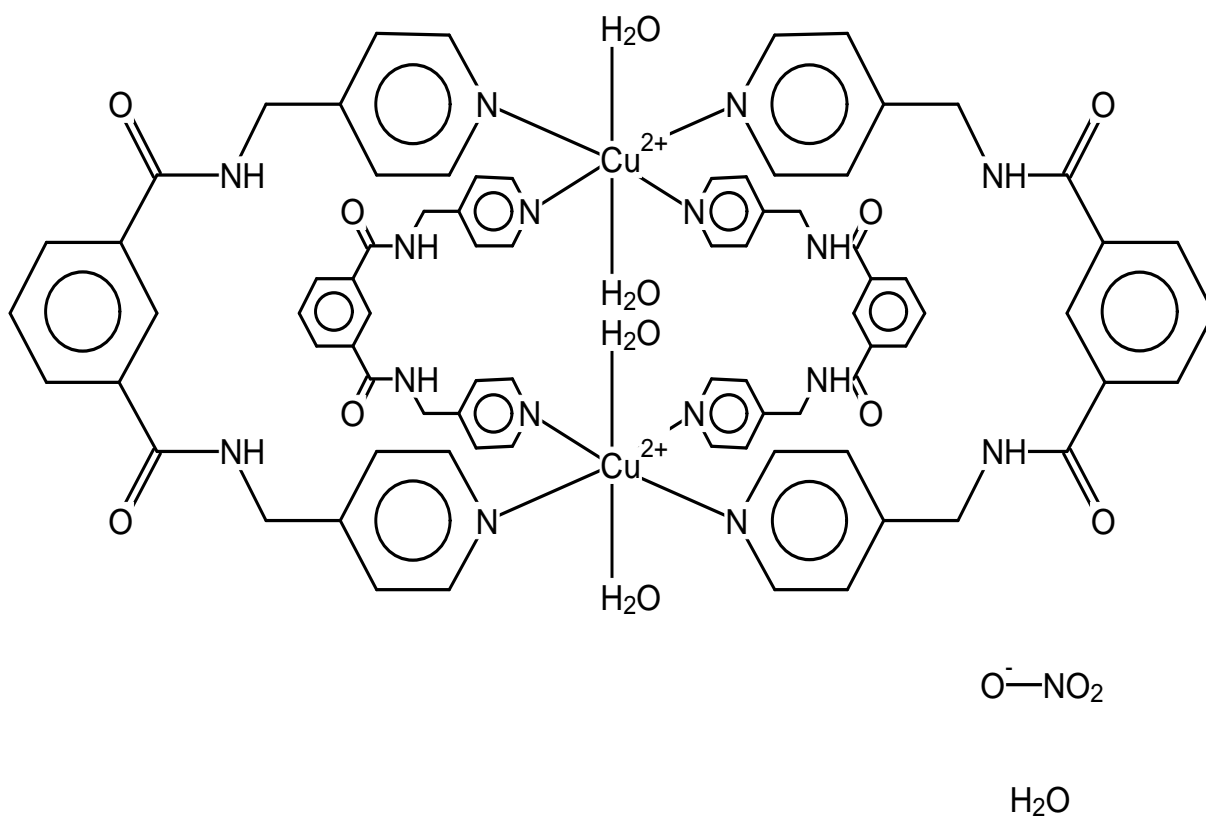

## Search: search28 (Thu May 26 10:48:21 2011): Hit 4

YIJBUP

**Reference:** P.Diaz, J.A.Tovilla, P.Ballester, J.Benet-Buchholz, R.Vilar  
(2007) *Dalton Trans.* ,3516

**Formula:**  $C_{94} H_{88} N_8 O_4 P_4 Pd_2^{4+}, 4(C_1 F_3 O_3 S_1^{-}), 0.75(C_3 H_8 O_1), 2(H_2 O_1)$

**Compound Name:** bis(( $\mu_2$ -1,3-bis(N-(4-Pyridylmethyl)carbamoyl)benzene)-(1,3-bis(diphenylphosphino)propane)-palladium(ii))  
tetrakis(trifluoromethanesulfonate) isopropanol solvate dihydrate

**Space Group:** P-1      **Cell:**      **a** 15.844(0)      **b** 18.838(0)      **c** 20.698(0)  
**Space Group No.:** 2      **(Å, °)**       $\alpha$  95.68(0)       $\beta$  94.48(0)       $\gamma$  104.57(0)

**R-Factor (%):** 8.41      **Temperature(K):** 100      **Density(g/cm<sup>3</sup>):** 1.352

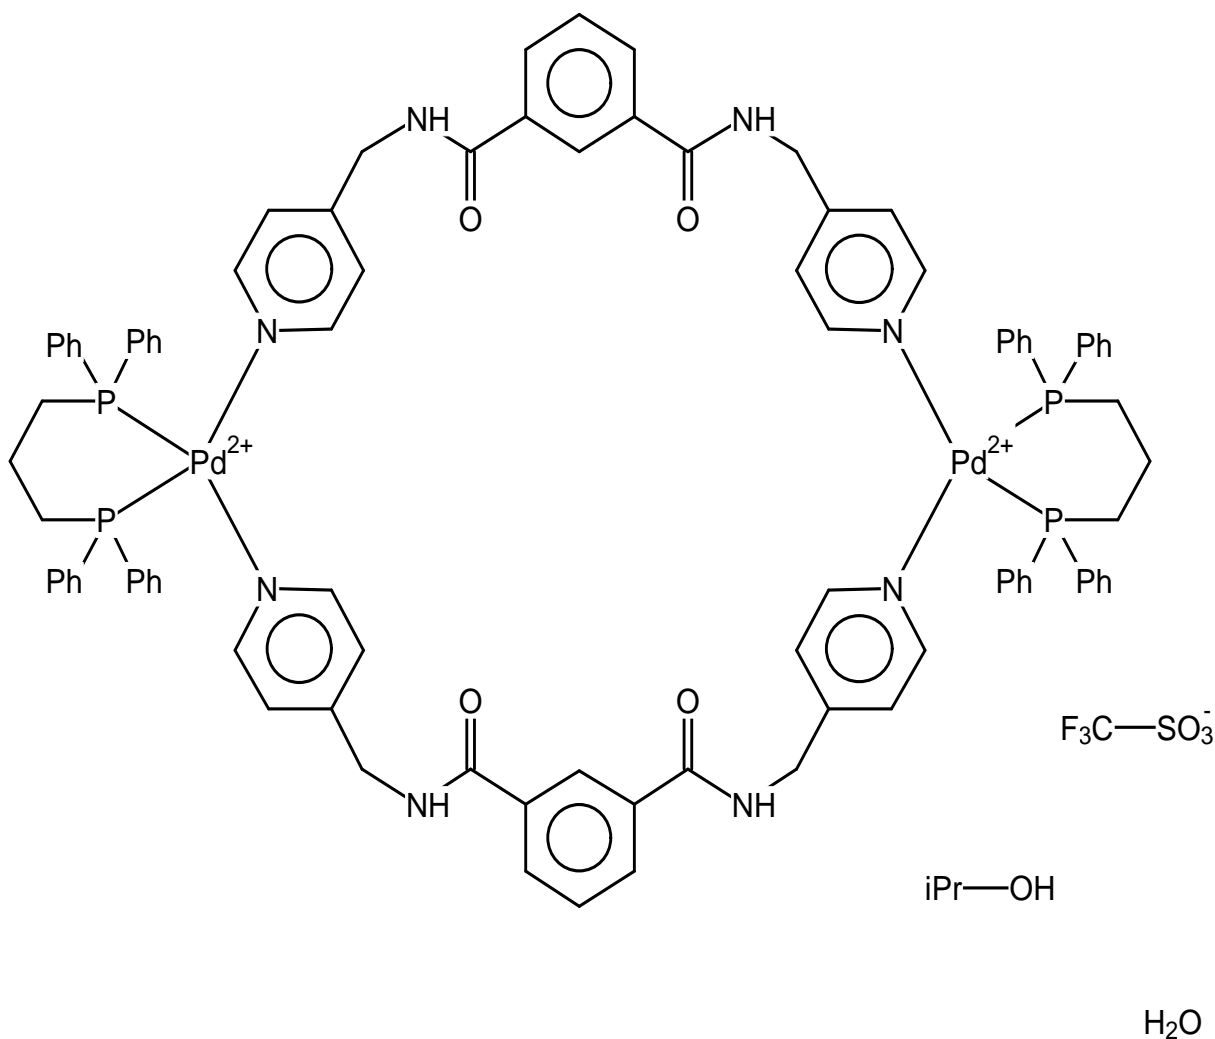

## Search Overview

**Search:** search29  
**Date/Time done:** Thu May 26 10:49:40 2011  
**Database(s):** CSD version 5.32 (November 2010)  
CSD version 5.32 updates (Nov 2010)  
**Restriction Info:** No refcode restrictions applied  
**Filters:** None  
**Percentage Completed:** 100%  
**Number of Hits:** 2

*Summary of queries used. Search found structures that:*

match

**Query 2**

**Query 3**

**Query 2**

4M

**Query 3**

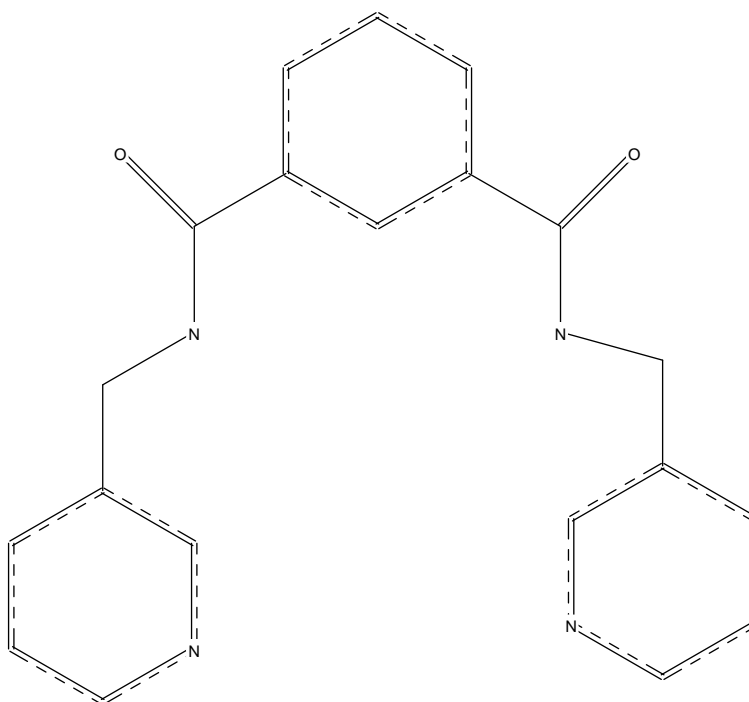

## Search: search29 (Thu May 26 10:49:40 2011): Hit 1

### FUJLOM

**Reference:** N.L.S.Yue, M.C.Jennings, R.J.Puddephatt (2010)  
*Dalton Trans.*, **39**,1273

**Formula:**  $(C_{40} H_{36} Ag_2 N_8 O_4^{2+})_n, 2n(C_2 F_3 O_2^{1-})$

**Compound Name:** catena-(bis( $\mu_2$ -1,3-bis(3-Pyridylmethylaminocarbonyl)benzene-N,N')-di-silver bis(trifluoroacetate))

**Space Group:** P21/c      **Cell:**      **a** 10.745(0)      **b** 11.395(0)      **c** 18.236(0)  
**Space Group No.:** 14      **(Å, °)**       $\alpha$  90.00       $\beta$  99.08(0)       $\gamma$  90.00

**R-Factor (%):** 5.46      **Temperature(K):** 150      **Density(g/cm<sup>3</sup>):** 1.709

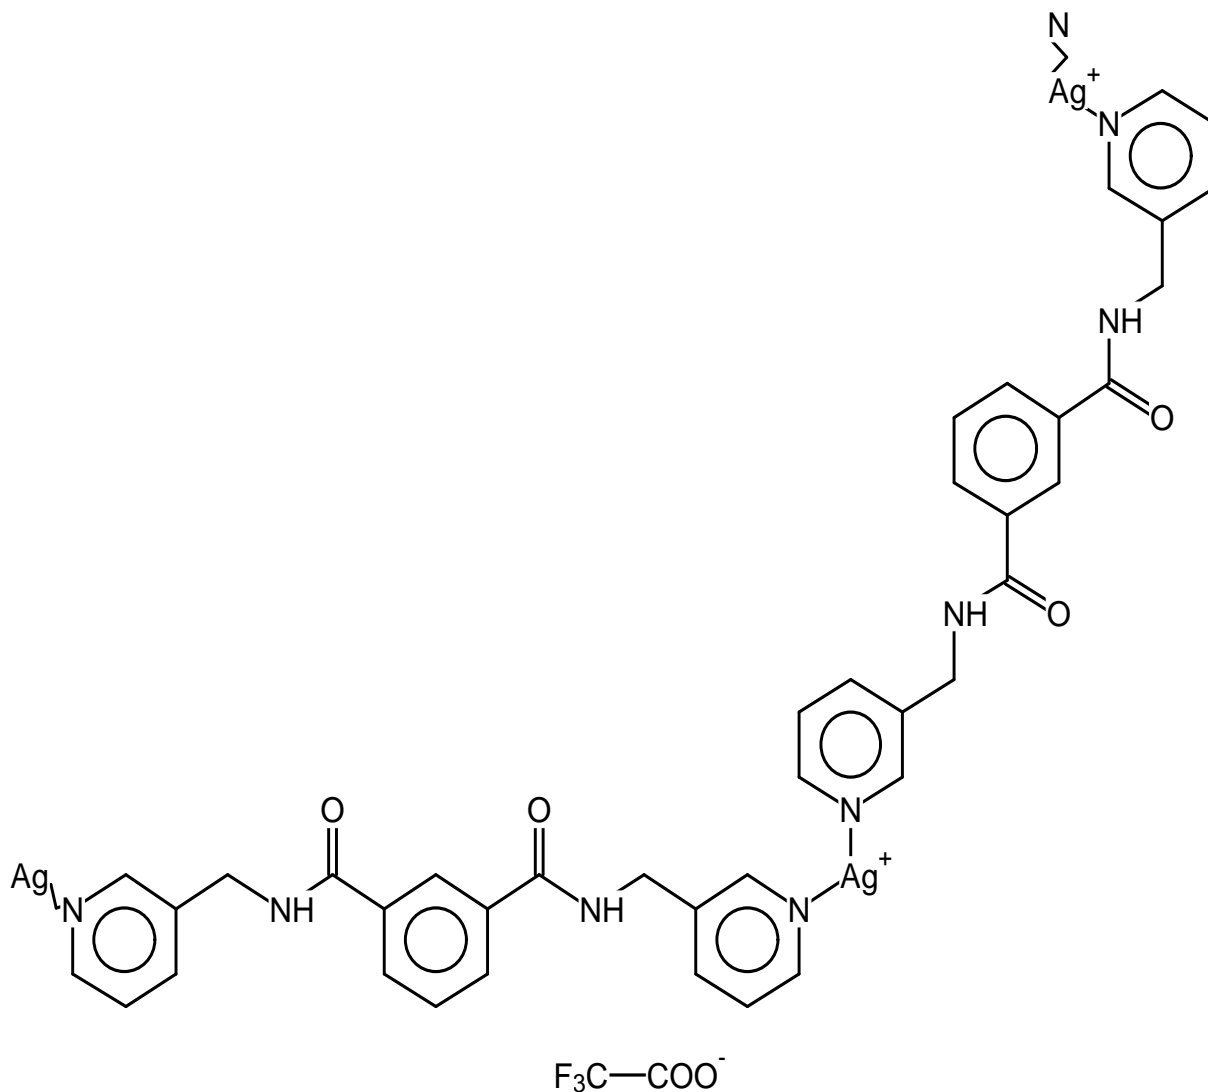

## Search: search29 (Thu May 26 10:49:40 2011): Hit 2

### FUJLUS

**Reference:** N.L.S.Yue, M.C.Jennings, R.J.Puddephatt (2010)  
*Dalton Trans.*, **39**,1273

**Formula:** (C<sub>20</sub> H<sub>18</sub> Ag<sub>1</sub> N<sub>4</sub> O<sub>2</sub><sup>1+</sup>)<sub>n</sub>,n(N<sub>1</sub> O<sub>3</sub><sup>1-</sup>)

**Compound Name:** catena-((μ<sub>2</sub>-1,3-bis(3-Pyridylmethylaminocarbonyl)benzene-N,N')-silver nitrate)

**Space Group:** Pbc<sub>a</sub>      **Cell:**      **a** 13.225(0)      **b** 9.678(0)      **c** 30.769(1)  
**Space Group No.:** 61      **(Å, °)**      **α** 90.00      **β** 90.00      **γ** 90.00

**R-Factor (%):** 4.37      **Temperature(K):** 150      **Density(g/cm<sup>3</sup>):** 1.742

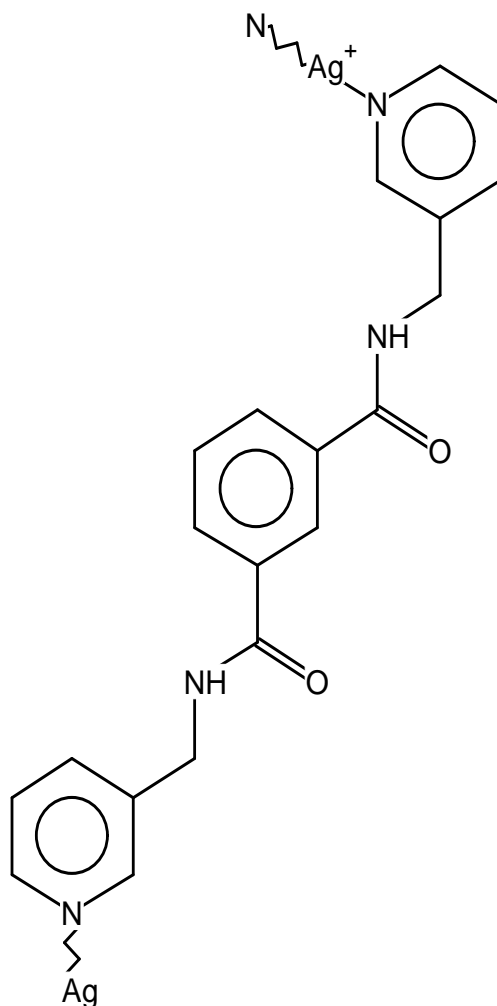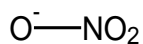



## Search Overview

**Search:** search30  
**Date/Time done:** Thu May 26 10:52:30 2011  
**Database(s):** CSD version 5.32 (November 2010)  
CSD version 5.32 updates (Nov 2010)  
**Restriction Info:** No refcode restrictions applied  
**Filters:** None  
**Percentage Completed:** 100%  
**Number of Hits:** 4

*Summary of queries used. Search found structures that:*

match

**Query 2**

**Query 3**

**Query 2**

4M

**Query 3**

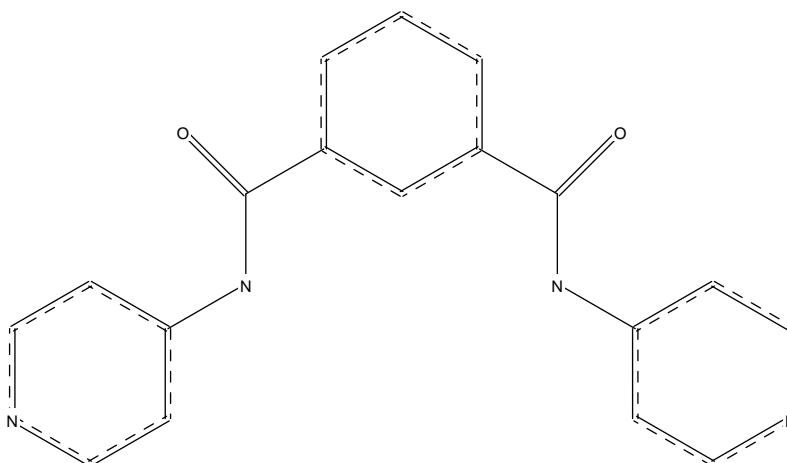

## Search: search30 (Thu May 26 10:52:30 2011): Hit 1

### MIGSEA

**Reference:** Zengquan Qin, M.C.Jennings, R.J.Puddephatt (2002)  
*Chem. Commun.* ,354

**Formula:** (C<sub>45</sub> H<sub>40</sub> N<sub>4</sub> O<sub>2</sub> P<sub>2</sub> Pd<sub>1</sub><sup>2+</sup>)<sub>n</sub>, 2n(C<sub>1</sub> F<sub>3</sub> O<sub>3</sub> S<sub>1</sub><sup>1-</sup>), n(C<sub>1</sub> H<sub>4</sub> O<sub>1</sub>), n(C<sub>3</sub> H<sub>8</sub> O<sub>1</sub>)

**Compound Name:** catena-((μ<sub>2</sub>-N,N'-bis(Pyridin-4-yl)isophthalamide-N,N')-(1,3-bis(diphenylphosphino)propane)-palladium(ii) bis(trifluoromethanesulfonate) methanol isopropanol solvate)

**Space Group:** P21/n      **Cell:**    **a** 16.301(0)    **b** 20.156(0)    **c** 17.293(0)  
**Space Group No.:** 14      **(Å, °)**    **α** 90.00      **β** 92.84(0)    **γ** 90.00

**R-Factor (%):** 12.59      **Temperature(K):** 200      **Density(g/cm<sup>3</sup>):** 1.437

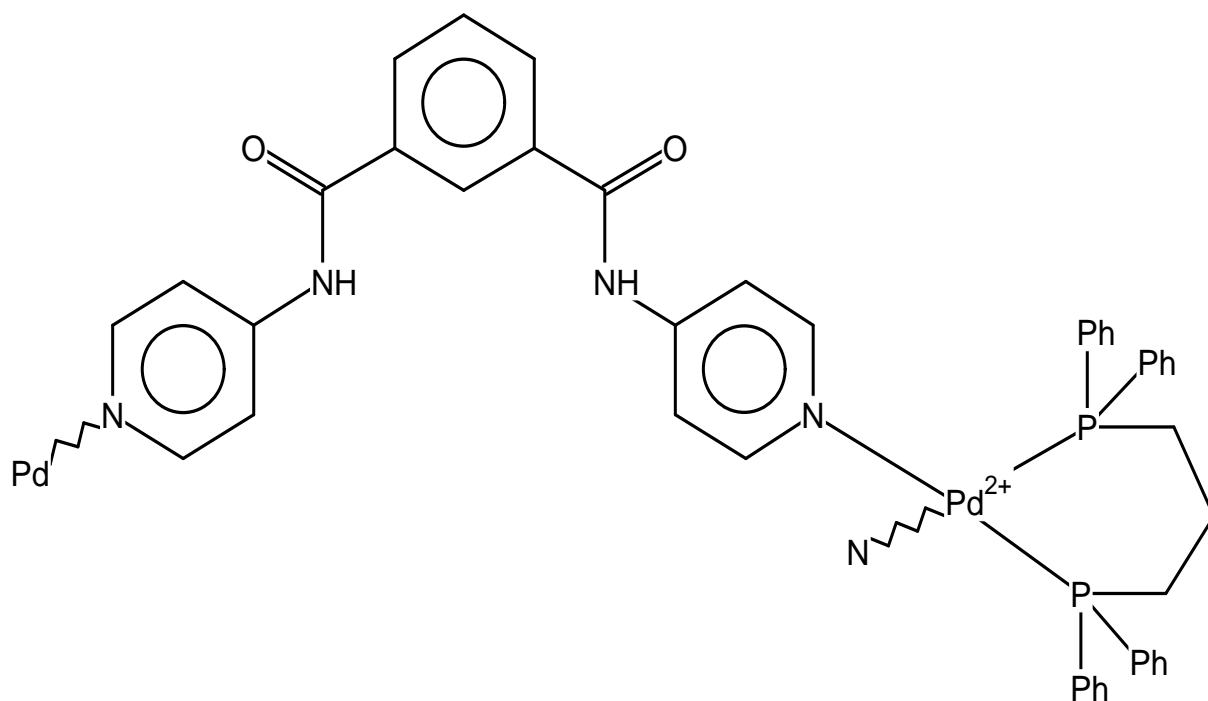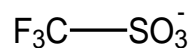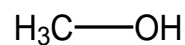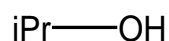

## Search: search30 (Thu May 26 10:52:30 2011): Hit 2

MIGSEA01

**Reference:** Zengquan Qin, M.C.Jennings, R.J.Puddephatt (2003)  
*Inorg.Chem.* ,**42**,1956

**Formula:** (C<sub>45</sub> H<sub>40</sub> N<sub>4</sub> O<sub>2</sub> P<sub>2</sub> Pd<sub>1</sub><sup>2+</sup>)<sub>n</sub>,2n(C<sub>1</sub> F<sub>3</sub> O<sub>3</sub> S<sub>1</sub><sup>1-</sup>),n(C<sub>1</sub> H<sub>4</sub> O<sub>1</sub>),n(C<sub>3</sub> H<sub>8</sub> O<sub>1</sub>)

**Compound Name:** catena-((μ<sub>2</sub>-N,N'-bis(Pyridin-4-yl)isophthalamide-N,N')-(1,3-bis(diphenylphosphino)propane-P,P')-palladium(ii) bis(trifluoromethanesulfonate) methanol isopropanol solvate)

**Space Group:** P21/n      **Cell:**      **a** 16.301(0)      **b** 20.156(0)      **c** 17.293(0)  
**Space Group No.:** 14      **(Å, °)**      **α** 90.00      **β** 92.84(0)      **γ** 90.00

**R-Factor (%):** 7.32      **Temperature(K):** 200      **Density(g/cm<sup>3</sup>):** 1.437

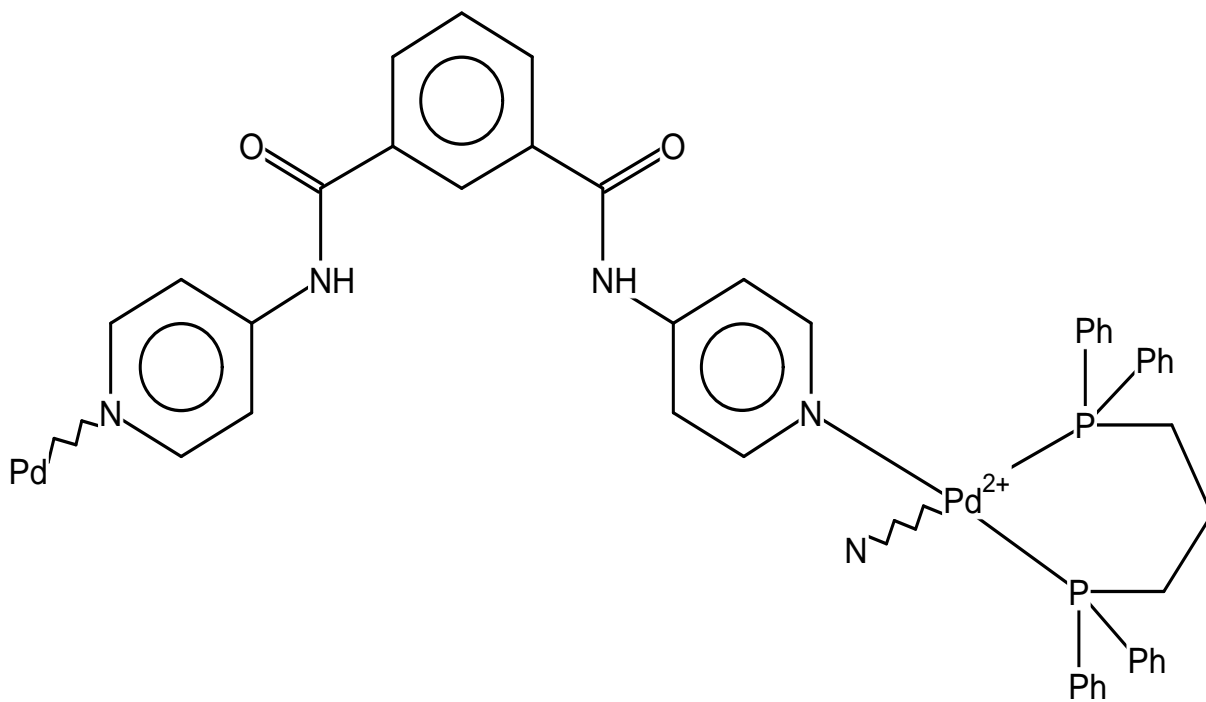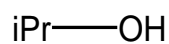

## Search: search30 (Thu May 26 10:52:30 2011): Hit 3

VUJVM

**Reference:** N.N.Adarsh, D.K.Kumar, P.Dastidar (2009)  
*CrystEngComm* ,11,796

**Formula:** (C<sub>36</sub> H<sub>28</sub> Cl<sub>2</sub> Co<sub>1</sub> N<sub>8</sub> O<sub>4</sub>)<sub>n</sub>.5.5n(H<sub>2</sub> O<sub>1</sub>)

**Compound Name:** catena-(bis(μ<sub>2</sub>-N,N'-bis(4-Pyridyl)isophthalamide-N,N')-dichloro-cobalt(ii) hydrate)

**Space Group:** P3221      **Cell:**      **a** 14.480(0)      **b** 14.480(0)      **c** 18.935(1)  
**Space Group No.:** 154      **(Å, °)**      **α** 90.00      **β** 90.00      **γ** 120.00

**R-Factor (%):** 5.85      **Temperature(K):** 298      **Density(g/cm<sup>3</sup>):** 1.254

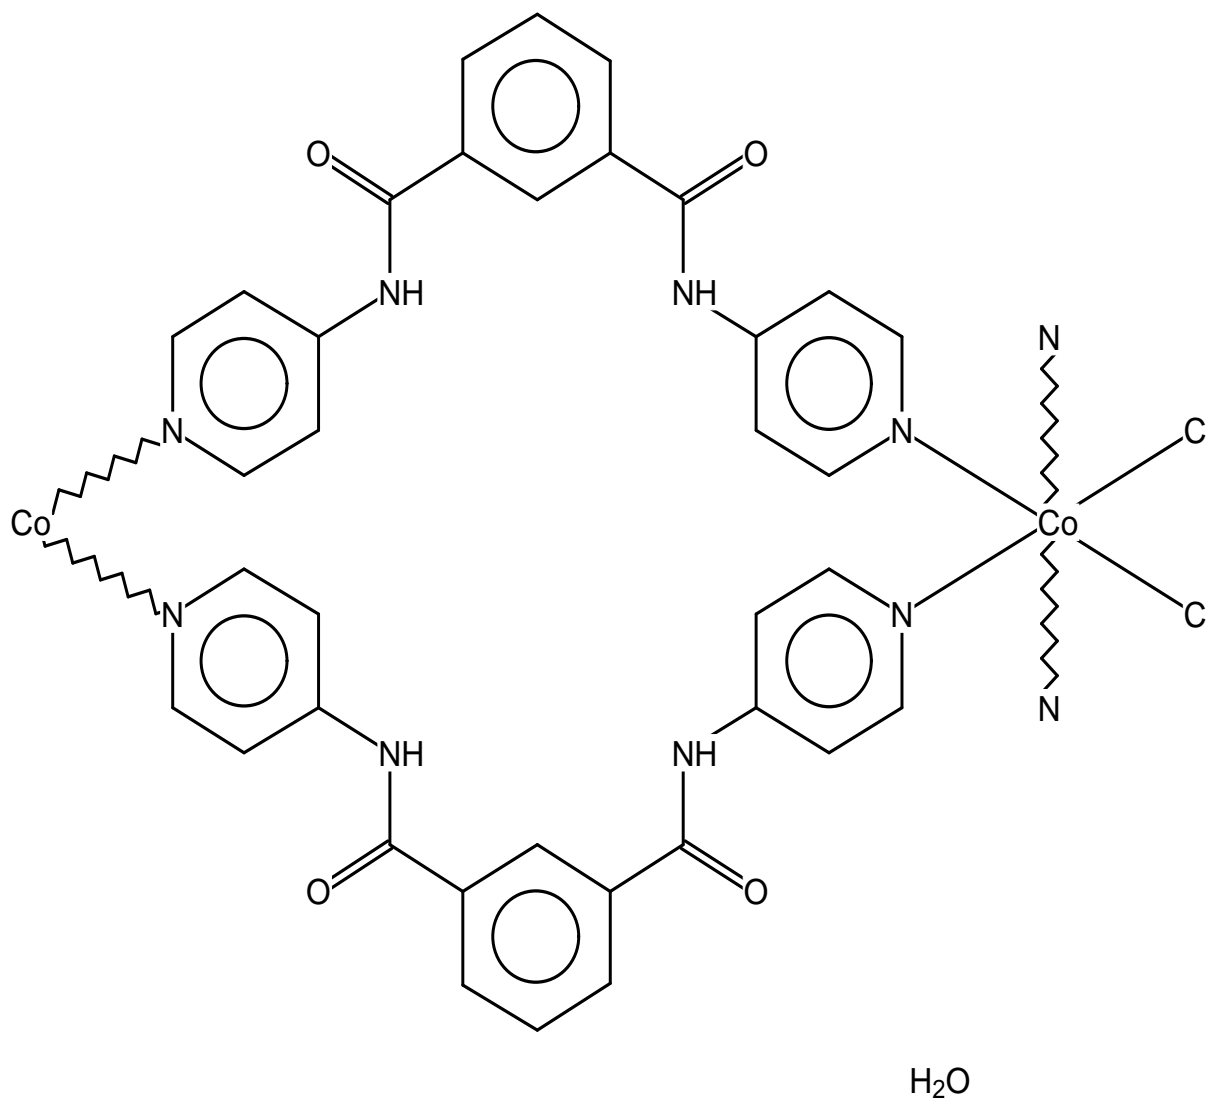

## Search: search30 (Thu May 26 10:52:30 2011): Hit 4

VUJVUS

**Reference:** N.N.Adarsh, D.K.Kumar, P.Dastidar (2009)  
*CrystEngComm* ,11,796

**Formula:** (C<sub>36</sub> H<sub>28</sub> Cd<sub>1</sub> N<sub>10</sub> O<sub>10</sub>)<sub>n</sub>.1.5n(H<sub>2</sub> O<sub>1</sub>)

**Compound Name:** catena-(bis(μ<sub>2</sub>-N,N'-bis(4-Pyridyl)isophthalamide-N,N')-bis(nitrato-O)-cadmium(ii) sesquihydrate)

**Space Group:** P-1      **Cell:**      **a** 9.131(4)      **b** 11.139(4)      **c** 20.248(7)  
**Space Group No.:** 2      **(Å, °)**      **α** 89.91(0)      **β** 85.13(0)      **γ** 70.81(0)

**R-Factor (%):** 7.68      **Temperature(K):** 298      **Density(g/cm<sup>3</sup>):** 1.543

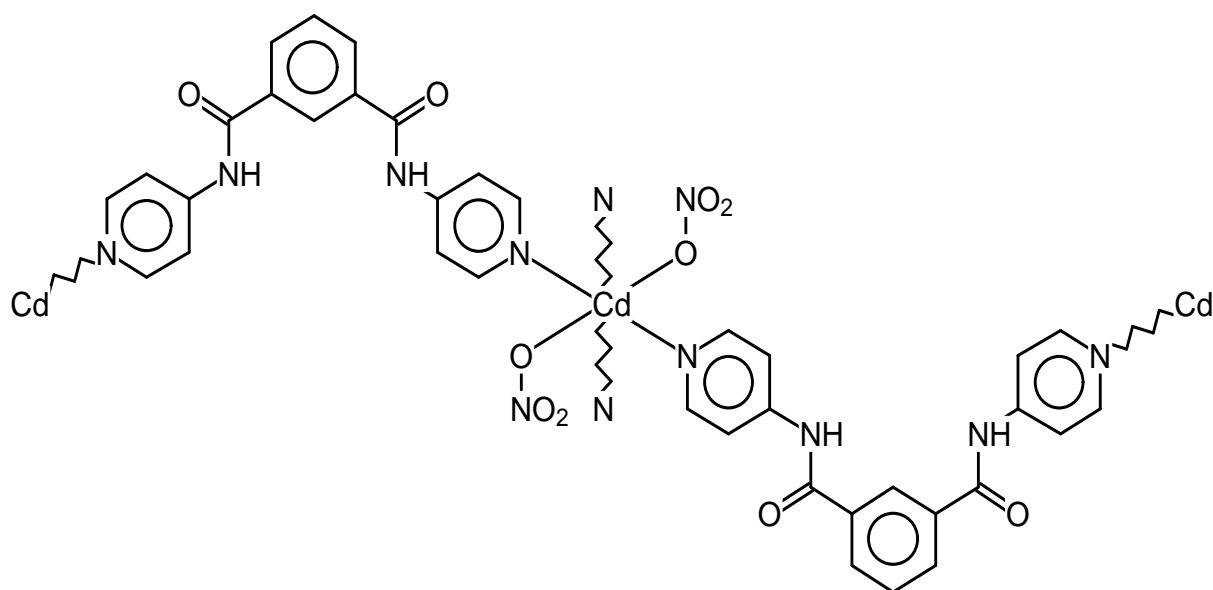

H<sub>2</sub>O

## Search Overview

**Search:** search31  
**Date/Time done:** Thu May 26 10:54:12 2011  
**Database(s):** CSD version 5.32 (November 2010)  
CSD version 5.32 updates (Nov 2010)  
**Restriction Info:** No refcode restrictions applied  
**Filters:** None  
**Percentage Completed:** 100%  
**Number of Hits:** 14

*Summary of queries used. Search found structures that:*

match

**Query 1**

**Query 2**

**Query 1**

4M

**Query 2**

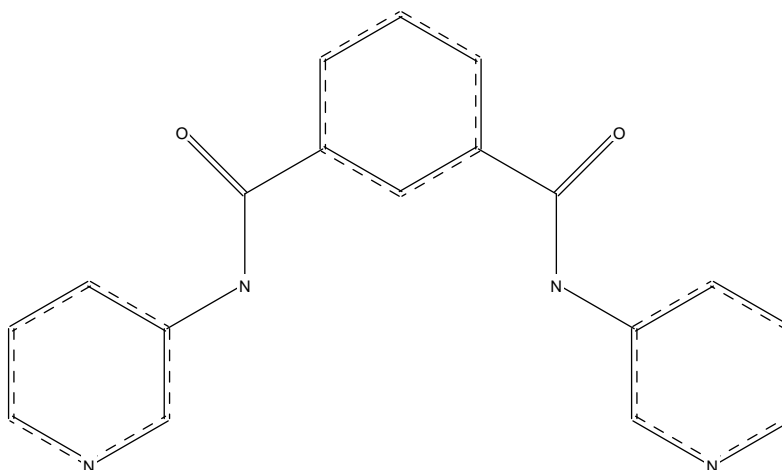

## Search: search31 (Thu May 26 10:54:12 2011): Hit 1

### AFOGIM

**Reference:** N.N.Adarsh, D.K.Kumar, P.Dastidar (2008)  
*Inorg.Chem.Commun.* ,11,636

**Formula:** C<sub>38</sub> H<sub>40</sub> Cd<sub>2</sub> N<sub>12</sub> O<sub>20</sub>

**Compound Name:** bis((μ<sub>2</sub>-N,N'-bis(3-Pyridyl)isophthalamide)-aqua-(methanol)-bis(nitrato-O)-di-cadmium(ii))

**Space Group:** P21/c      **Cell:**      **a** 7.644(0)      **b** 17.971(0)      **c** 17.939(0)  
**Space Group No.:** 14      **(Å, °)**      **α** 90.00      **β** 114.19(0)      **γ** 90.00

**R-Factor (%):** 2.09      **Temperature(K):** 100      **Density(g/cm<sup>3</sup>):** 1.787

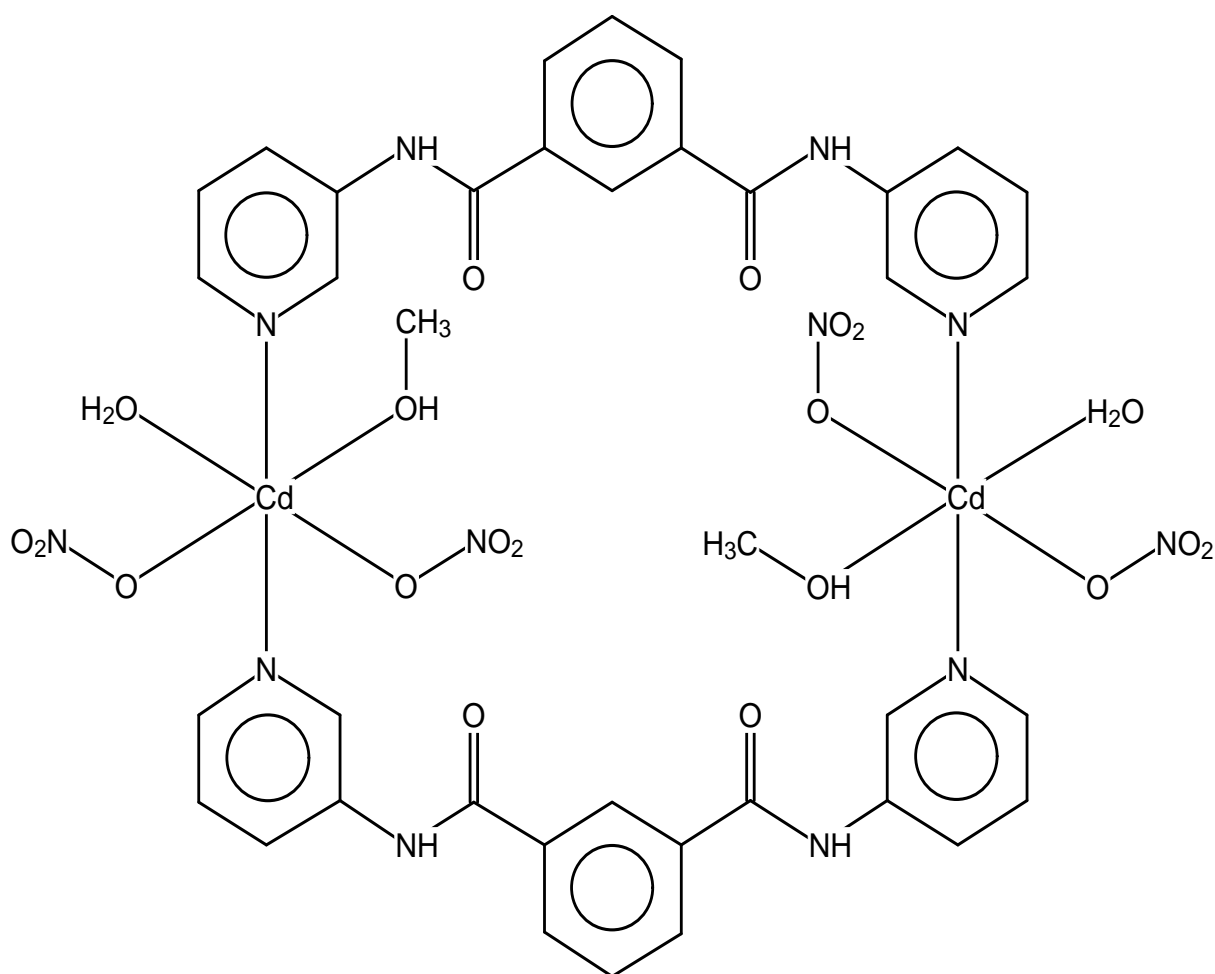

## Search: search31 (Thu May 26 10:54:12 2011): Hit 2

### AFOGOS

**Reference:** N.N.Adarsh, D.K.Kumar, P.Dastidar (2008)  
*Inorg.Chem.Commun.* ,11,636

**Formula:** (C<sub>18</sub> H<sub>18</sub> Cd<sub>1</sub> N<sub>4</sub> O<sub>8</sub> S<sub>1</sub>)<sub>n</sub>

**Compound Name:** catena-((μ<sub>2</sub>-N,N'-bis(3-Pyridyl)isophthalamide)-(μ<sub>2</sub>-sulfato-O,O')-diaqua-cadmium(ii))

**Space Group:** P21/n      **Cell:**      **a** 8.067(0)      **b** 28.516(3)      **c** 9.156(1)  
**Space Group No.:** 14      **(Å, °)**      **α** 90.00      **β** 104.33(0)      **γ** 90.00

**R-Factor (%):** 3.09      **Temperature(K):** 100      **Density(g/cm<sup>3</sup>):** 1.832

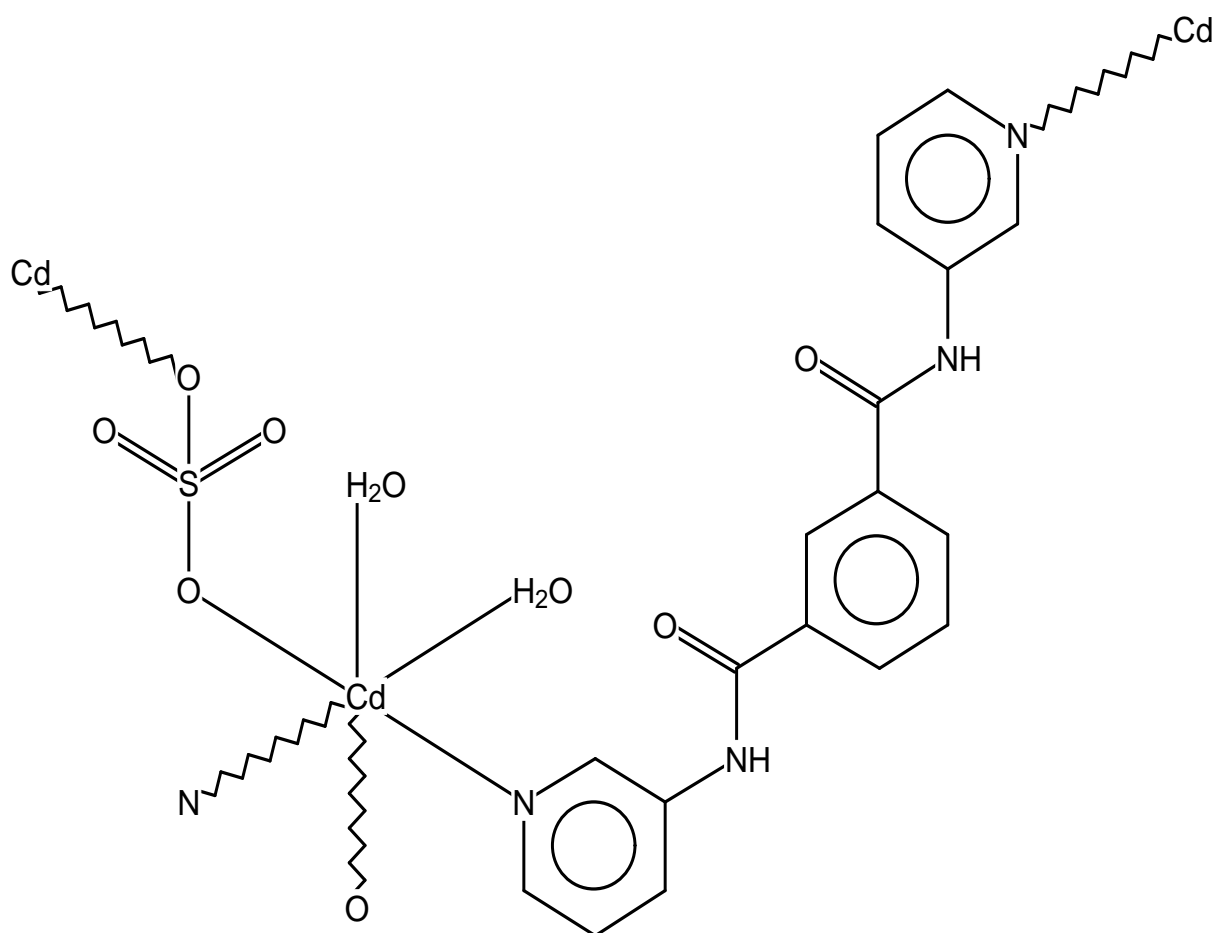



## Search: search31 (Thu May 26 10:54:12 2011): Hit 3

### ELEPOA

**Reference:** N.Yue, Zengquan Qin, M.C.Jennings, D.J.Eisler,  
R.J.Puddephatt (2003) *Inorg.Chem.Commun.* ,6,1269

**Formula:**  $C_{72} H_{56} N_{16} O_8 Pd_2^{4+}, 4(C_1 F_3 O_3 S_1^{1-}), 2(H_2 O_1)$

**Compound Name:** tetrakis( $\mu_2$ -1,3-bis(N-(3-Pyridyl)carbamoyl)benzene)-di-palladium(ii)  
tetrakis(trifluoromethanesulfonate) dihydrate clathrate

**Space Group:** P21/c      **Cell:**      **a** 15.318(0)      **b** 26.705(0)      **c** 14.598(0)  
**Space Group No.:** 14      **(Å, °)**       $\alpha$  90.00       $\beta$  115.22(0)       $\gamma$  90.00

**R-Factor (%):** 4.11      **Temperature(K):** 200      **Density(g/cm<sup>3</sup>):** 1.302

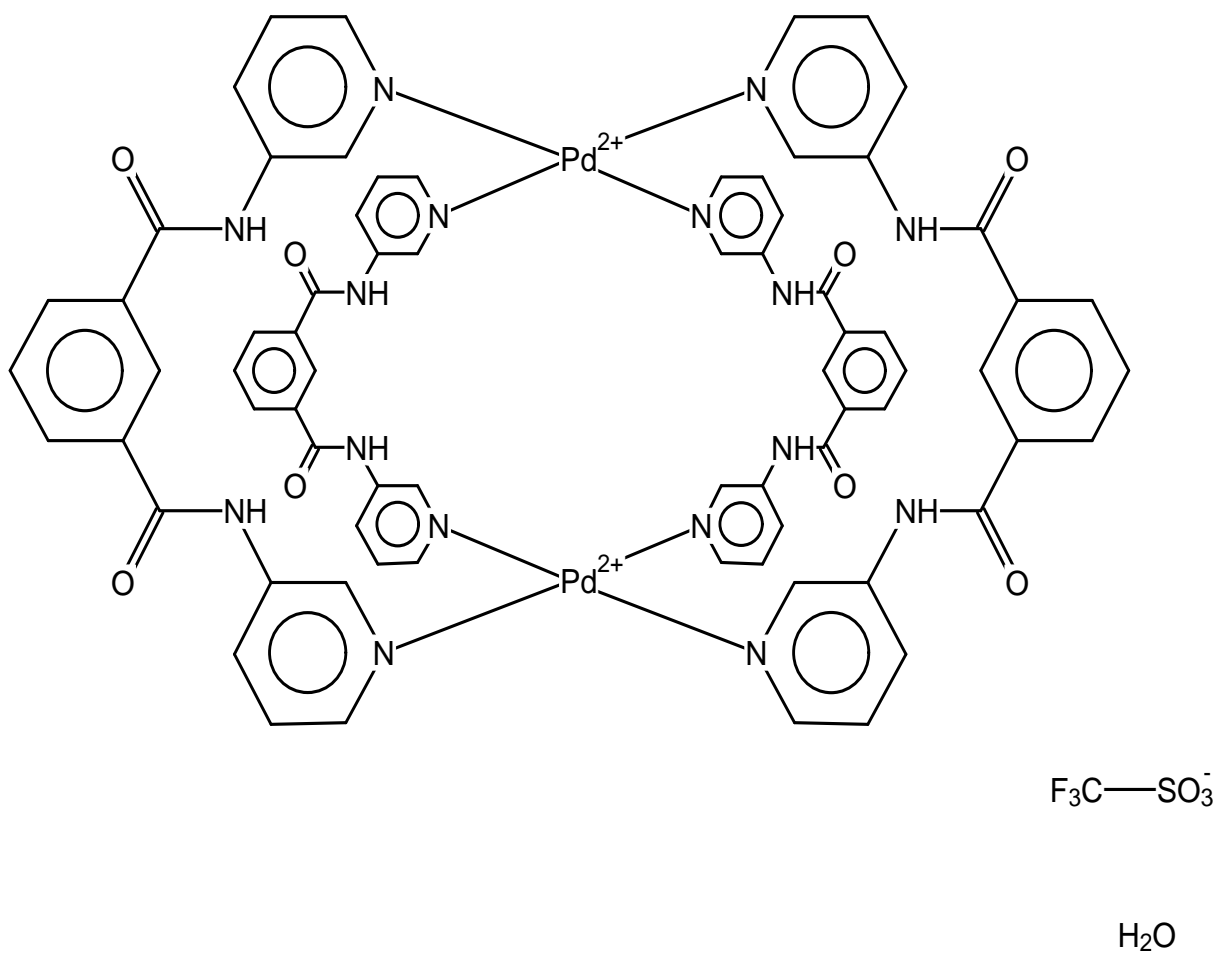

## Search: search31 (Thu May 26 10:54:12 2011): Hit 4

### ELEPUG

**Reference:** N.Yue, Zengquan Qin, M.C.Jennings, D.J.Eisler,  
R.J.Puddephatt (2003) *Inorg.Chem.Commun.* ,6,1269

**Formula:** C<sub>36</sub> H<sub>28</sub> Cl<sub>4</sub> N<sub>8</sub> O<sub>4</sub> Pd<sub>2</sub>,2(C<sub>3</sub> H<sub>7</sub> N<sub>1</sub> O<sub>1</sub>)

**Compound Name:** trans,trans-bis( $\mu_2$ -1,3-bis(N-(3-Pyridyl)carbamoyl)benzene)-bis(dichloro-palladium(ii)) dimethylformamide clathrate dimethylformamide solvate

**Space Group:** C2/c      **Cell:**    **a** 23.632(0)    **b** 8.404(0)    **c** 22.987(0)  
**Space Group No.:** 15      **(Å, °)**     $\alpha$  90.00       $\beta$  97.93(0)     $\gamma$  90.00

**R-Factor (%):** 5.03      **Temperature(K):** 200      **Density(g/cm<sup>3</sup>):** 1.671

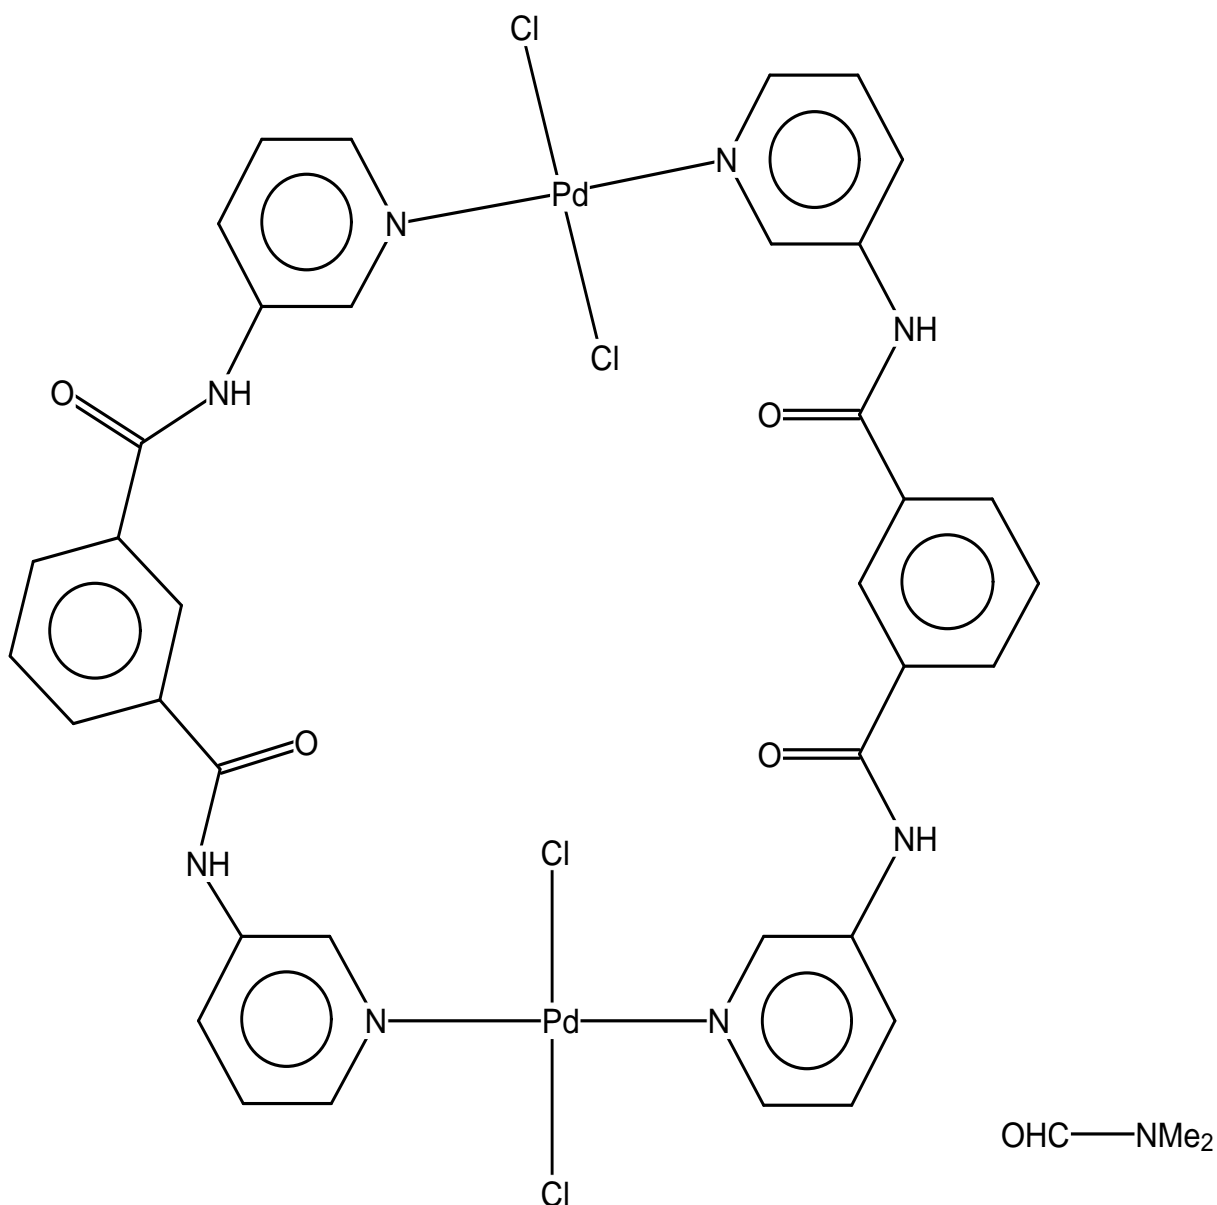

## Search: search31 (Thu May 26 10:54:12 2011): Hit 5

ELEPUG01

**Reference:** N.L.S.Yue, D.J.Eisler, M.C.Jennings, R.J.Puddephatt  
(2004) *Inorg.Chem.* ,**43**,7671

**Formula:** C<sub>36</sub> H<sub>28</sub> Cl<sub>4</sub> N<sub>8</sub> O<sub>4</sub> Pd<sub>2</sub>·2(C<sub>3</sub> H<sub>7</sub> N<sub>1</sub> O<sub>1</sub>)

**Compound Name:** trans,trans-bis(μ<sub>2</sub>-N,N'-bis(3-Pyridyl)benzene-1,3-dicarboxamide)-tetrachloro-di-palladium(ii) N,N-dimethylformamide clathrate N,N-dimethylformamide solvate

|                         |      |                        |                    |                                   |                    |
|-------------------------|------|------------------------|--------------------|-----------------------------------|--------------------|
| <b>Space Group:</b>     | C2/c | <b>Cell:</b>           | <b>a</b> 23.632(0) | <b>b</b> 8.404(0)                 | <b>c</b> 22.987(0) |
| <b>Space Group No.:</b> | 15   | <b>(Å, °)</b>          | <b>α</b> 90.00     | <b>β</b> 97.93(0)                 | <b>γ</b> 90.00     |
| <b>R-Factor (%):</b>    | 5.03 | <b>Temperature(K):</b> | 200                | <b>Density(g/cm<sup>3</sup>):</b> | 1.671              |

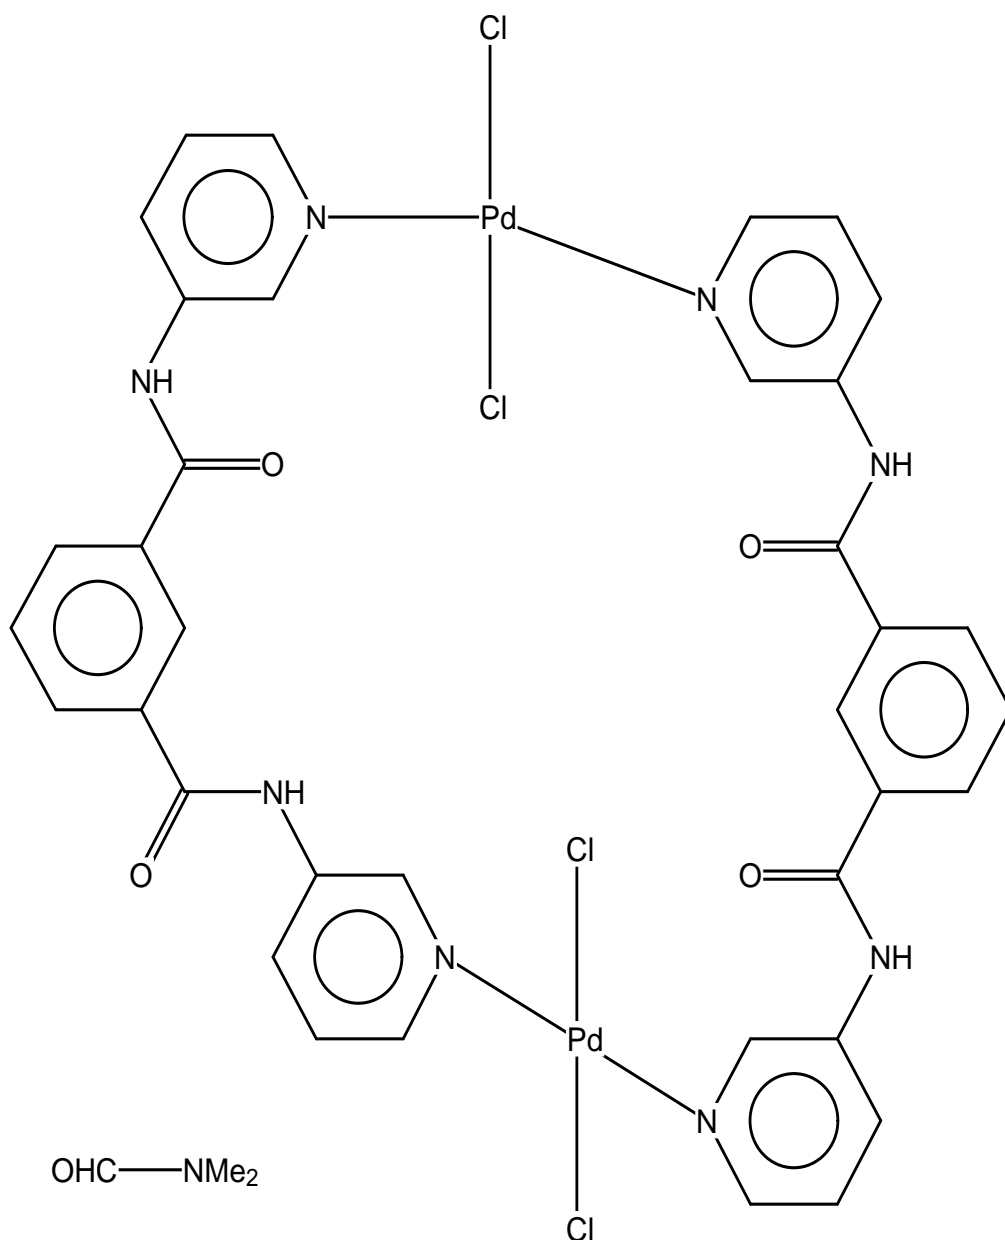



## Search: search31 (Thu May 26 10:54:12 2011): Hit 7

ELEQAN01

**Reference:** N.L.S.Yue, D.J.Eisler, M.C.Jennings, R.J.Puddephatt  
(2004) *Inorg.Chem.*, **43**,7671

**Formula:**  $C_{72} H_{56} N_{16} O_8 Pd_2^{4+}, 4(C_2 F_3 O_2^{1-}), C_6 H_6, 2(H_2 O_1)$

**Compound Name:** tetrakis( $\mu_2$ -N,N'-bis(3-Pyridyl)benzene-1,3-dicarboxamide)-di-palladium(ii) dihydrate clathrate tetrakis(trifluoroacetate) benzene solvate

**Space Group:** P-1      **Cell:**    **a** 12.965(0)    **b** 13.145(0)    **c** 15.860(0)  
**Space Group No.:** 2      **(Å, °)**     $\alpha$  81.91(0)     $\beta$  88.59(0)     $\gamma$  68.95(0)

**R-Factor (%):** 7.66      **Temperature(K):** 200      **Density(g/cm<sup>3</sup>):** 1.365

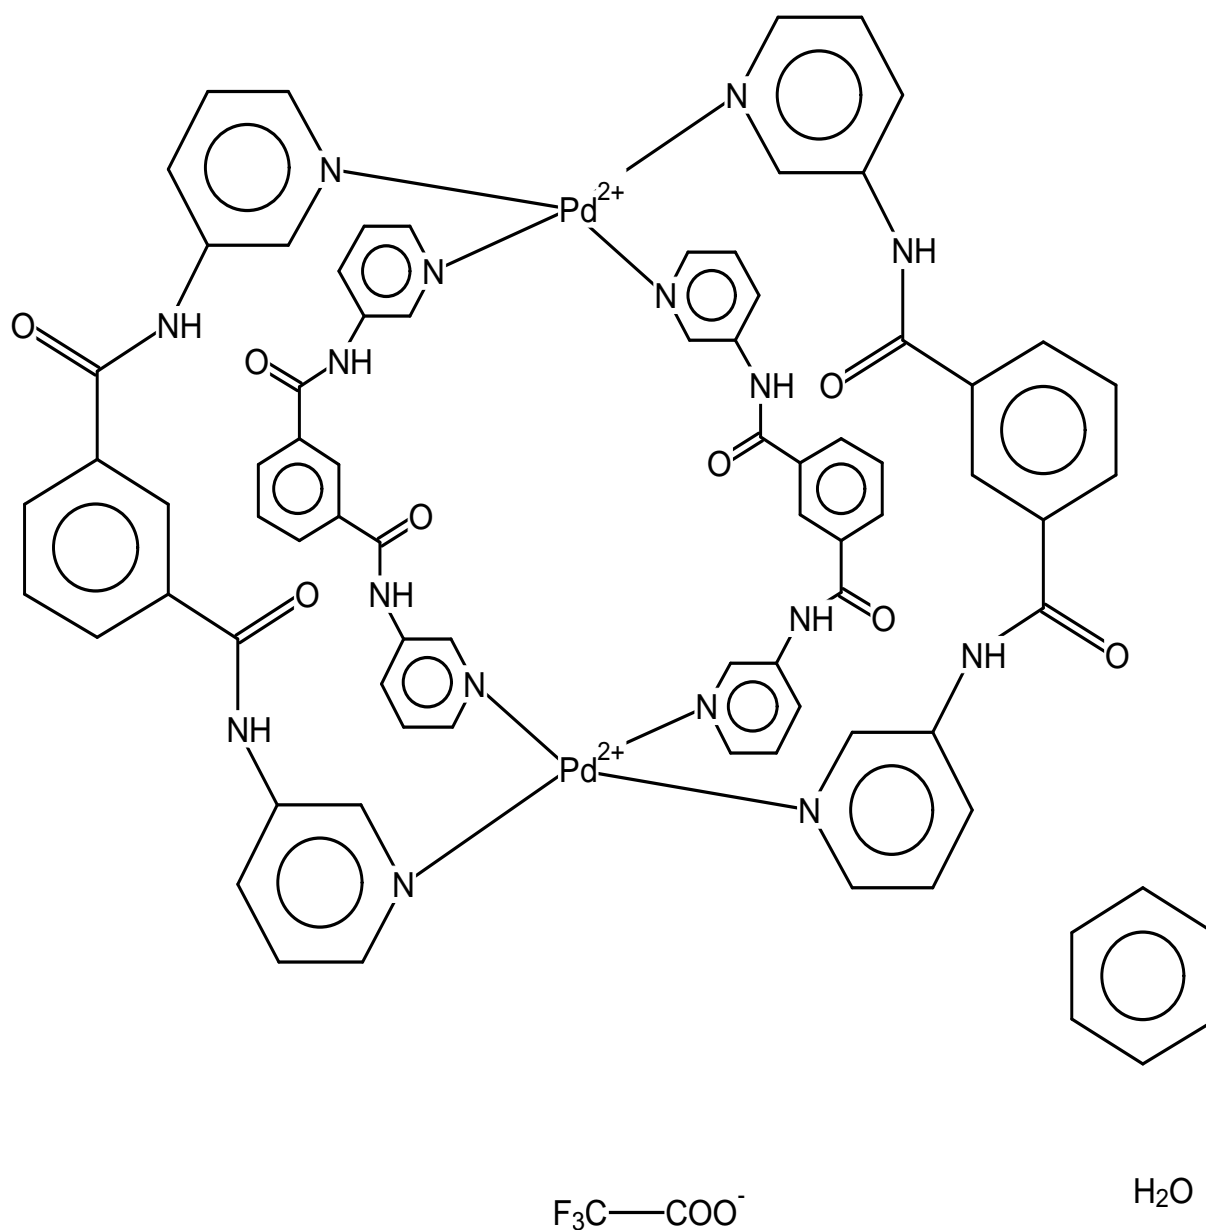

## Search: search31 (Thu May 26 10:54:12 2011): Hit 8

### ELEQER

**Reference:** N.Yue, Zengquan Qin, M.C.Jennings, D.J.Eisler, R.J.Puddephatt (2003) *Inorg.Chem.Commun.* ,6,1269

**Formula:**  $C_{80} H_{60} F_{12} N_{16} Na_2 O_{18} Pd_2^{2+}, 2(C_2 F_3 O_2^{-}), 4(C_7 H_5 N_1), 2(H_2 O_1)$

**Compound Name:** tetrakis( $\mu_3$ -1,3-bis(N-(3-Pyridyl)carbamoyl)benzene)-bis(trifluoroacetato-O,O')-bis(trifluoroacetato-O)-diaqua-di-palladium(ii)-di-sodium dihydrate clathrate bis(trifluoroacetate) cyanobenzene solvate

|                         |       |                        |                    |                                   |                    |
|-------------------------|-------|------------------------|--------------------|-----------------------------------|--------------------|
| <b>Space Group:</b>     | P21/n | <b>Cell:</b>           | <b>a</b> 13.318(0) | <b>b</b> 16.026(0)                | <b>c</b> 26.818(0) |
| <b>Space Group No.:</b> | 14    | <b>(Å, °)</b>          | $\alpha$ 90.00     | $\beta$ 90.81(0)                  | $\gamma$ 90.00     |
| <b>R-Factor (%):</b>    | 4.77  | <b>Temperature(K):</b> | 150                | <b>Density(g/cm<sup>3</sup>):</b> | 1.564              |

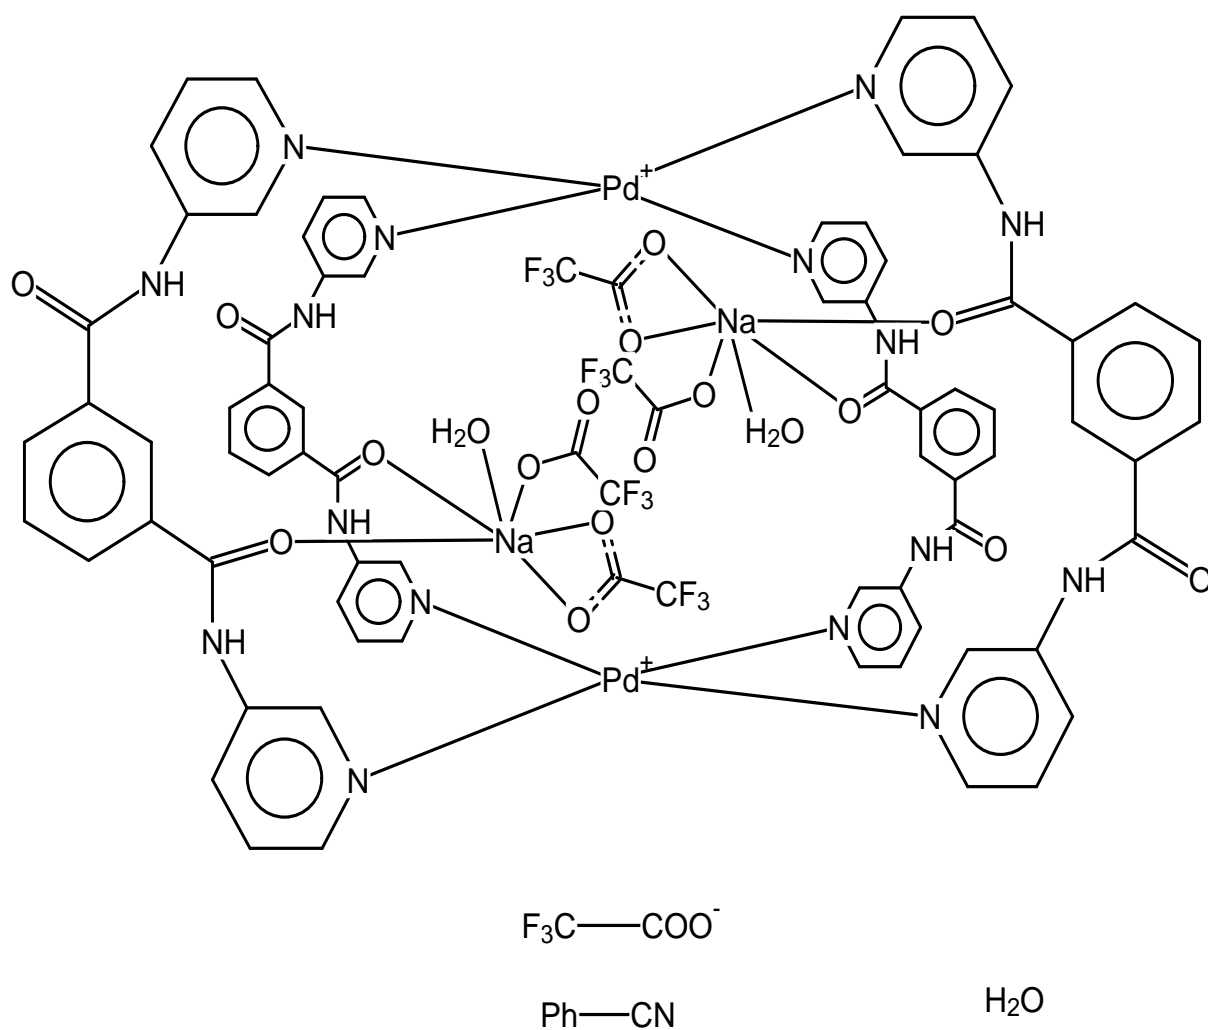

## Search: search31 (Thu May 26 10:54:12 2011): Hit 9

ELEQER01

**Reference:** N.L.S.Yue, D.J.Eisler, M.C.Jennings, R.J.Puddephatt  
(2004) *Inorg.Chem.* ,**43**,7671

**Formula:** C<sub>80</sub> H<sub>60</sub> F<sub>12</sub> N<sub>16</sub> Na<sub>2</sub> O<sub>18</sub> Pd<sub>2</sub><sup>2+</sup>,2(C<sub>2</sub> F<sub>3</sub> O<sub>2</sub><sup>1-</sup>),4(C<sub>7</sub> H<sub>5</sub> N<sub>1</sub>),2(H<sub>2</sub> O<sub>1</sub>)

**Compound Name:** tetrakis(μ<sub>3</sub>-N,N'-bis(3-Pyridyl)benzene-1,3-dicarboxamide)-bis(trifluoroacetato-O,O')-bis(trifluoroacetato-O)-diaqua-di-palladium(ii)-di-sodium bis(trifluoroacetate) benzonitrile solvate dihydrate

|                         |       |                        |                    |                                   |                    |
|-------------------------|-------|------------------------|--------------------|-----------------------------------|--------------------|
| <b>Space Group:</b>     | P21/n | <b>Cell:</b>           | <b>a</b> 13.318(0) | <b>b</b> 16.026(0)                | <b>c</b> 26.818(0) |
| <b>Space Group No.:</b> | 14    | <b>(Å, °)</b>          | <b>α</b> 90.00     | <b>β</b> 90.81(0)                 | <b>γ</b> 90.00     |
| <b>R-Factor (%):</b>    | 4.77  | <b>Temperature(K):</b> | 150                | <b>Density(g/cm<sup>3</sup>):</b> | 1.564              |



## Search: search31 (Thu May 26 10:54:12 2011): Hit 10

ELEQIV

**Reference:** N.Yue, Zengquan Qin, M.C.Jennings, D.J.Eisler,  
R.J.Puddephatt (2003) *Inorg.Chem.Commun.* ,6,1269

**Formula:**  $C_{80} H_{60} F_{12} K_2 N_{16} O_{18} Pd_2^{2+}, 2(C_2 F_3 O_2^{-}), 4(C_7 H_5 N_1), 2(H_2 O_1)$

**Compound Name:** tetrakis( $\mu_3$ -1,3-bis(N-(3-Pyridyl)carbamoyl)benzene)-bis( $\mu_2$ -trifluoroacetato-O,O')-bis(trifluoroacetato-O,O')-diaqua-di-palladium(ii)-di-potassium dihydrate clathrate bis(trifluoroacetate) cyanobenzene solvate

|                         |       |                        |                    |                                   |                    |
|-------------------------|-------|------------------------|--------------------|-----------------------------------|--------------------|
| <b>Space Group:</b>     | P21/n | <b>Cell:</b>           | <b>a</b> 13.298(0) | <b>b</b> 16.095(0)                | <b>c</b> 26.936(0) |
| <b>Space Group No.:</b> | 14    | (Å, °)                 | $\alpha$ 90.00     | $\beta$ 91.37(0)                  | $\gamma$ 90.00     |
| <b>R-Factor (%):</b>    | 5.52  | <b>Temperature(K):</b> | 150                | <b>Density(g/cm<sup>3</sup>):</b> | 1.571              |

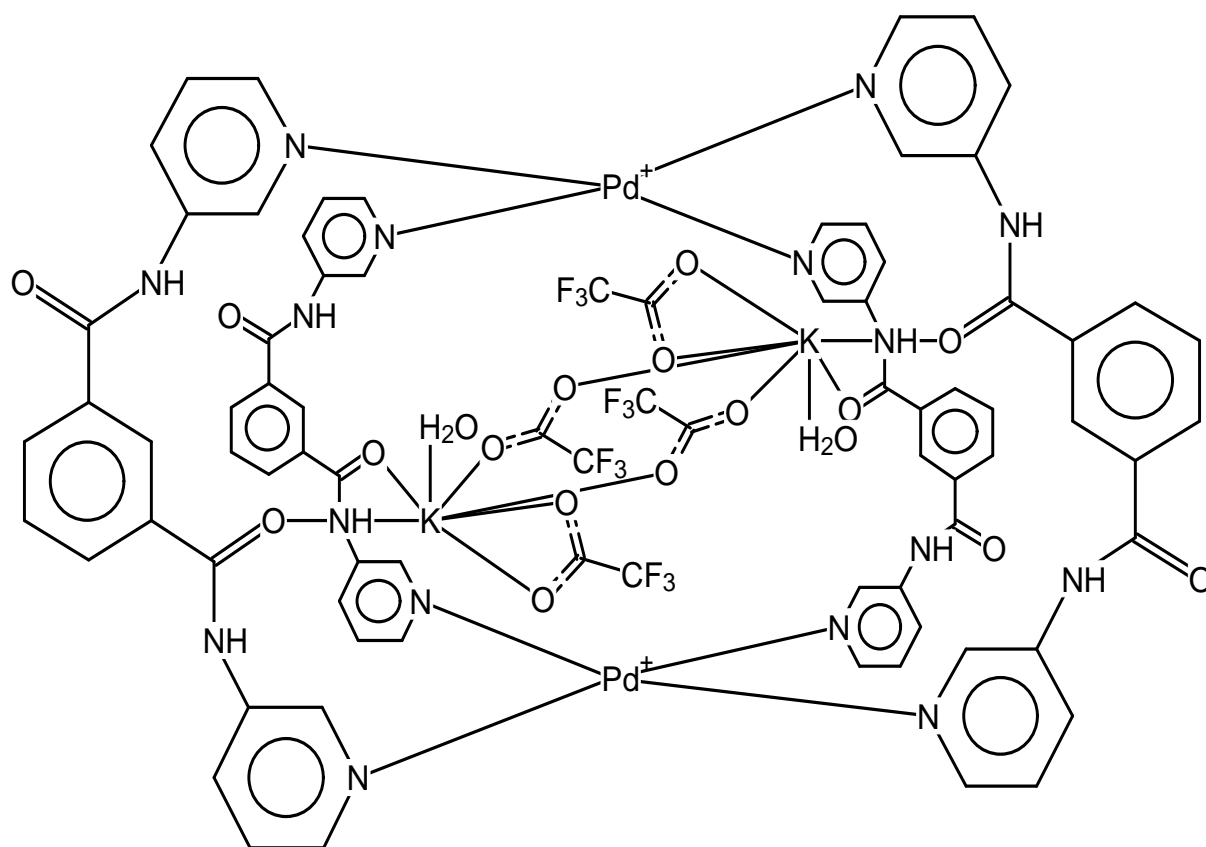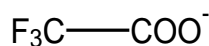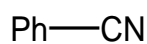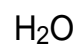



## Search: search31 (Thu May 26 10:54:12 2011): Hit 11

ELEQIV01

**Reference:** N.L.S.Yue, D.J.Eisler, M.C.Jennings, R.J.Puddephatt  
(2004) *Inorg.Chem.* ,**43**,7671

**Formula:** C<sub>80</sub> H<sub>60</sub> F<sub>12</sub> K<sub>2</sub> N<sub>16</sub> O<sub>18</sub> Pd<sub>2</sub><sup>2+</sup>,2(C<sub>2</sub> F<sub>3</sub> O<sub>2</sub><sup>1-</sup>),4(C<sub>7</sub> H<sub>5</sub> N<sub>1</sub>),2(H<sub>2</sub> O<sub>1</sub>)

**Compound Name:** tetrakis(μ<sub>2</sub>-N,N'-bis(3-Pyridyl)benzene-1,3-dicarboxamide)-bis(μ<sub>2</sub>-trifluoroacetato-O,O')-bis(trifluoroacetato-O,O')-diaqua-di-palladium(ii)-di-potassium bis(trifluoroacetate) benzonitrile solvate dihydrate

|                         |       |                        |                    |                                   |                    |
|-------------------------|-------|------------------------|--------------------|-----------------------------------|--------------------|
| <b>Space Group:</b>     | P21/n | <b>Cell:</b>           | <b>a</b> 13.298(0) | <b>b</b> 16.095(0)                | <b>c</b> 26.936(0) |
| <b>Space Group No.:</b> | 14    | <b>(Å, °)</b>          | <b>α</b> 90.00     | <b>β</b> 91.37(0)                 | <b>γ</b> 90.00     |
| <b>R-Factor (%):</b>    | 5.52  | <b>Temperature(K):</b> | 150                | <b>Density(g/cm<sup>3</sup>):</b> | 1.571              |

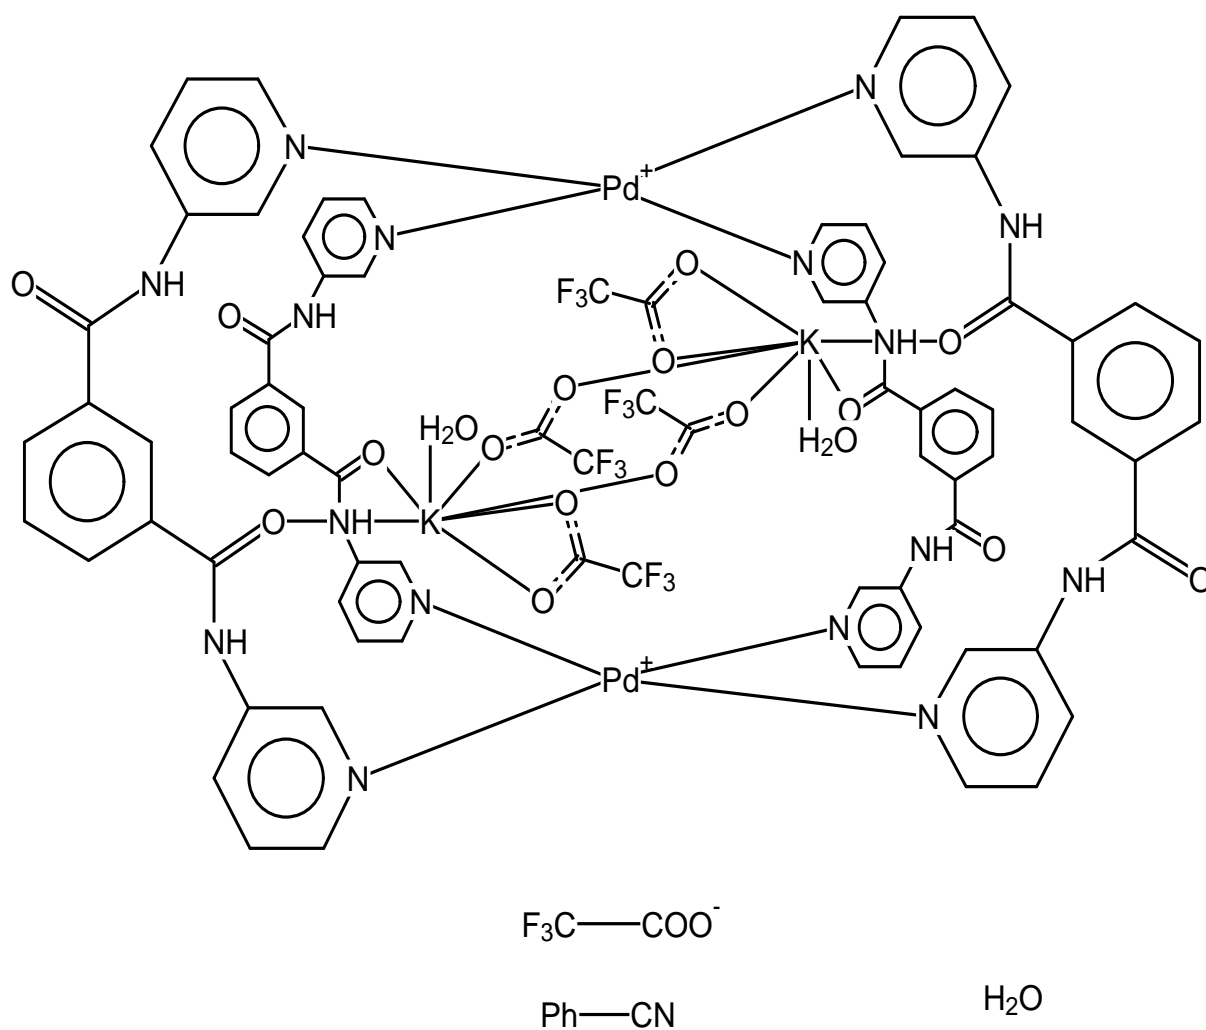

## Search: search31 (Thu May 26 10:54:12 2011): Hit 12

MIPJIE

**Reference:** Zengquan Qin, M.C.Jennings, R.J.Puddephatt (2002)  
*Chem.-Eur.J.*, **8**,735

**Formula:**  $C_{44} H_{36} Au_2 N_4 O_2 P_2^{2+}, 2(C_2 F_3 O_2^{1-}), C_1 H_2 Cl_2, H_2 O_1$

**Compound Name:** ( $\mu_2$ -trans-1,2-bis(Diphenylphosphino)ethene)-( $\mu_2$ -N,N'-bis(3-pyridyl)-1,3-benzenedicarboxamide)-di-gold bis(trifluoroacetate) dichloromethane solvate monohydrate

|                         |      |                        |                    |                                   |                    |
|-------------------------|------|------------------------|--------------------|-----------------------------------|--------------------|
| <b>Space Group:</b>     | P-1  | <b>Cell:</b>           | <b>a</b> 9.745(0)  | <b>b</b> 14.518(0)                | <b>c</b> 19.678(0) |
| <b>Space Group No.:</b> | 2    | (Å, °)                 | $\alpha$ 107.02(0) | $\beta$ 99.85(0)                  | $\gamma$ 98.26(0)  |
| <b>R-Factor (%):</b>    | 4.92 | <b>Temperature(K):</b> | 200                | <b>Density(g/cm<sup>3</sup>):</b> | 1.860              |

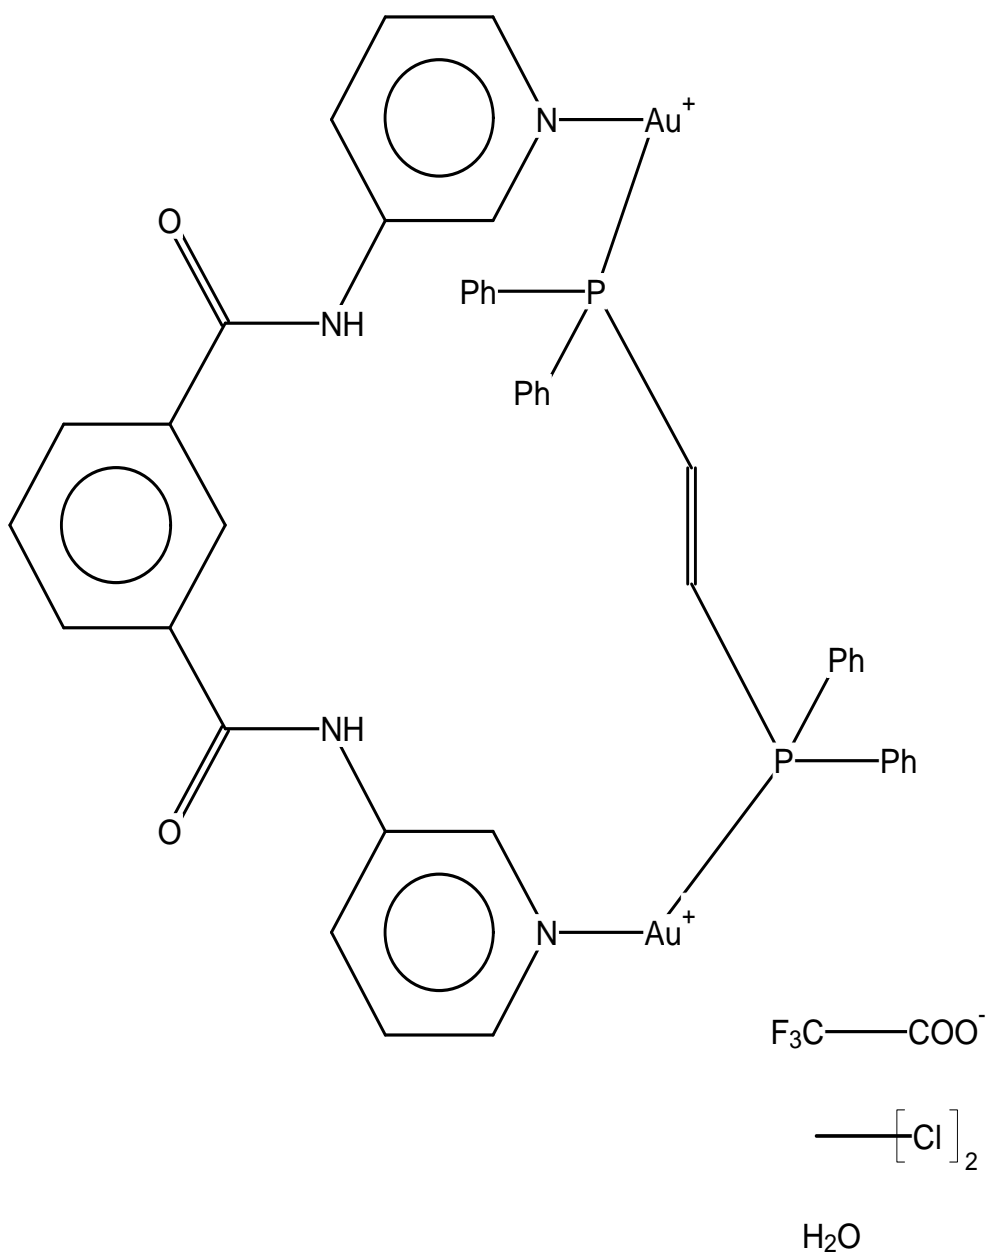

## Search: search31 (Thu May 26 10:54:12 2011): Hit 13

### MIPJOK

**Reference:** Zengquan Qin, M.C.Jennings, R.J.Puddephatt (2002)  
*Chem.-Eur.J.*, **8**,735

**Formula:**  $(C_{88} H_{76} Au_4 N_8 O_4 P_4^{4+})n, 4n(C_2 F_3 O_2^{1-}), n(C_3 H_6 O_1), n(C_6 H_{14}), n(H_2 O_1)$

**Compound Name:** catena-(bis( $\mu_2$ -trans-1,2-bis(Diphenylphosphino)ethene)-bis( $\mu_2$ -N,N'-bis(3-pyridyl)-1,3-benzenedicarboxamide)-tetra-gold tetrakis(trifluoroacetate) acetone hexane solvate monohydrate)

|                         |       |                        |                    |                                   |                    |
|-------------------------|-------|------------------------|--------------------|-----------------------------------|--------------------|
| <b>Space Group:</b>     | P21/c | <b>Cell:</b>           | <b>a</b> 11.359(0) | <b>b</b> 33.551(3)                | <b>c</b> 28.731(2) |
| <b>Space Group No.:</b> | 14    | (Å, °)                 | $\alpha$ 90.00     | $\beta$ 92.28(0)                  | $\gamma$ 90.00     |
| <b>R-Factor (%):</b>    | 7.77  | <b>Temperature(K):</b> | 200                | <b>Density(g/cm<sup>3</sup>):</b> | 1.722              |

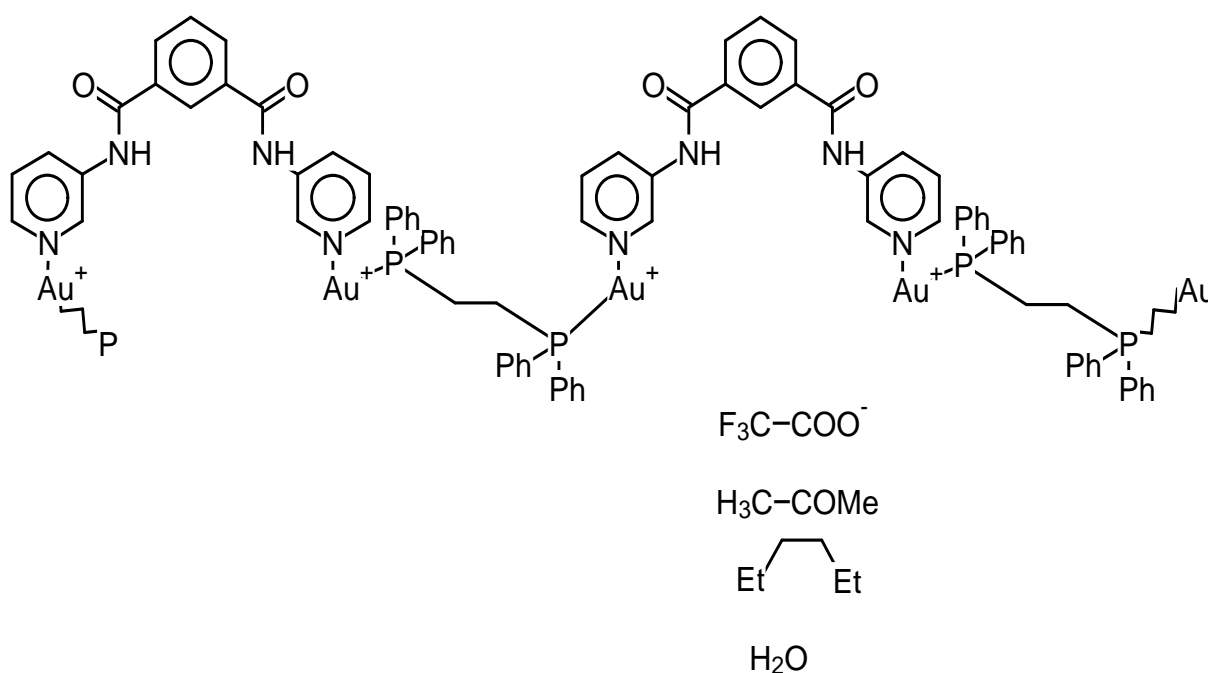

## Search: search31 (Thu May 26 10:54:12 2011): Hit 14

VUJWAZ

**Reference:** N.N.Adarsh, D.K.Kumar, P.Dastidar (2009)  
*CrystEngComm* ,11,796

**Formula:**  $(C_{18} H_{22} Co_1 N_4 O_6^{2+})_n, n(O_4 S_1^{2-}), 3n(H_2 O_1)$

**Compound Name:** catena-(( $\mu_2$ -N,N'-bis(3-Pyridyl)isophthalamide-N,N')-tetra-aqua-cobalt(ii) sulfate trihydrate)

**Space Group:** P21/c      **Cell:**    **a** 9.940(0)    **b** 16.813(1)    **c** 14.957(1)  
**Space Group No.:** 14      **(Å, °)**     $\alpha$  90.00       $\beta$  95.15(0)     $\gamma$  90.00

**R-Factor (%):** 5.53      **Temperature(K):** 100      **Density(g/cm<sup>3</sup>):** 1.599

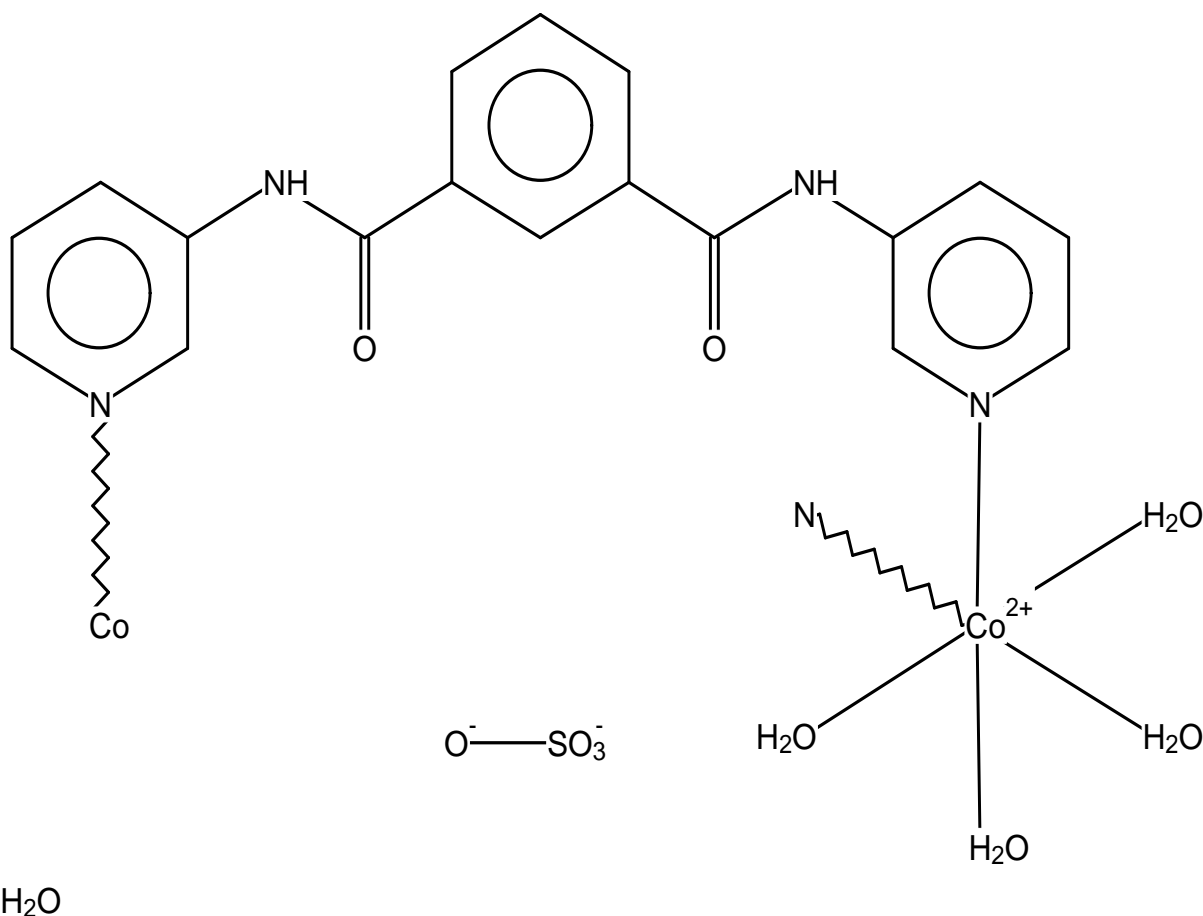

## Search Overview

**Search:** search32  
**Date/Time done:** Thu May 26 10:55:19 2011  
**Database(s):** CSD version 5.32 (November 2010)  
CSD version 5.32 updates (Nov 2010)  
**Restriction Info:** No refcode restrictions applied  
**Filters:** None  
**Percentage Completed:** 100%  
**Number of Hits:** 2

*Summary of queries used. Search found structures that:*

match

**Query 2**

**Query 3**

**Query 2**

4M

**Query 3**

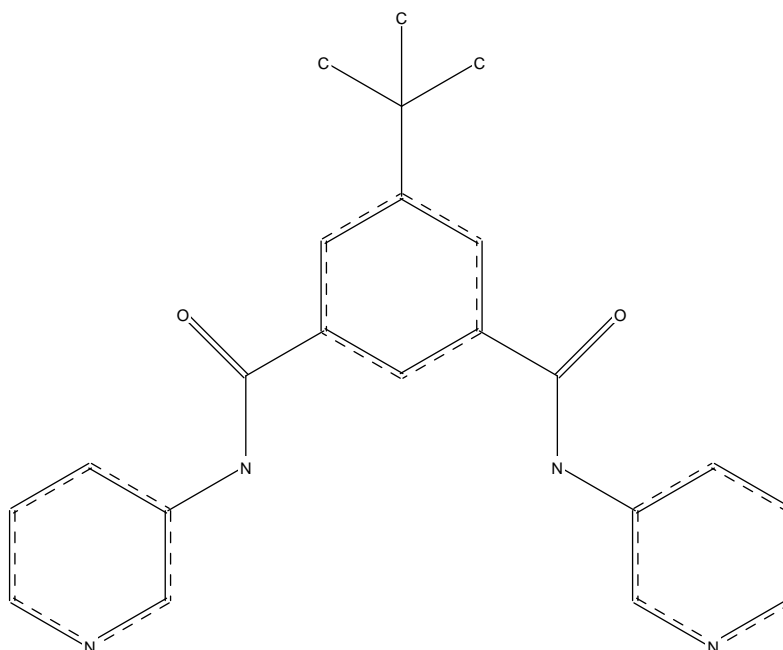

## Search: search32 (Thu May 26 10:55:19 2011): Hit 1

### DALKEH

**Reference:** N.L.S.Yue, D.J.Eisler, M.C.Jennings, R.J.Puddephatt  
(2004) *Inorg.Chem.* ,**43**,7671

**Formula:** C<sub>44</sub> H<sub>44</sub> Cl<sub>4</sub> N<sub>8</sub> O<sub>4</sub> Pd<sub>2</sub>,4(C<sub>3</sub> H<sub>7</sub> N<sub>1</sub> O<sub>1</sub>)

**Compound Name:** trans,trans-bis(μ<sub>2</sub>-N,N'-bis(3-Pyridyl)-5-t-butylbenzene-1,3-dicarboxamide)-tetrachloro-di-palladium(ii) bis(N,N-dimethylformamide) clathrate N,N-dimethylformamide solvate

|                         |       |                        |                   |                                   |                    |
|-------------------------|-------|------------------------|-------------------|-----------------------------------|--------------------|
| <b>Space Group:</b>     | P21/n | <b>Cell:</b>           | <b>a</b> 9.341(0) | <b>b</b> 23.677(0)                | <b>c</b> 14.033(0) |
| <b>Space Group No.:</b> | 14    | <b>(Å, °)</b>          | <b>α</b> 90.00    | <b>β</b> 95.37(0)                 | <b>γ</b> 90.00     |
| <b>R-Factor (%):</b>    | 4.49  | <b>Temperature(K):</b> | 150               | <b>Density(g/cm<sup>3</sup>):</b> | 1.500              |

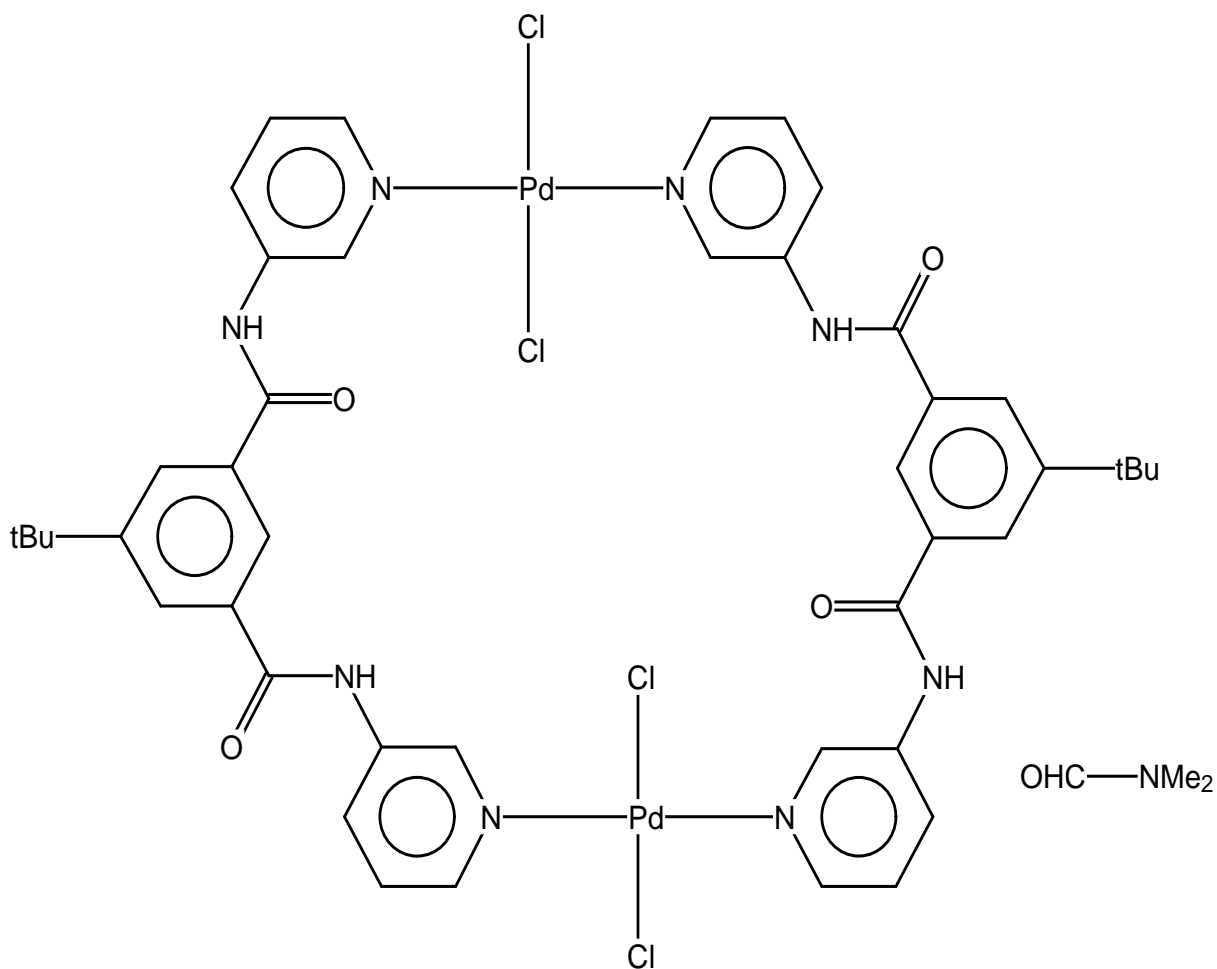

## Search: search32 (Thu May 26 10:55:19 2011): Hit 2

### DALKIL

**Reference:** N.L.S.Yue, D.J.Eisler, M.C.Jennings, R.J.Puddephatt  
(2004) *Inorg.Chem.* ,**43**,7671

**Formula:** C<sub>88</sub> H<sub>88</sub> N<sub>16</sub> O<sub>8</sub> Pd<sub>2</sub><sup>4+</sup>,4(Cl<sub>1</sub><sup>1-</sup>),4(C<sub>1</sub> H<sub>1</sub> Cl<sub>3</sub>),8(H<sub>2</sub> O<sub>1</sub>)

**Compound Name:** tetrakis(μ<sub>2</sub>-N,N'-bis(3-Pyridyl)-5-t-butylbenzene-1,3-dicarboxamide)-di-palladium(ii) dichloride tetrahydrate clathrate dichloride chloroform solvate tetrahydrate

|                         |      |                        |                    |                                   |                    |
|-------------------------|------|------------------------|--------------------|-----------------------------------|--------------------|
| <b>Space Group:</b>     | P4/n | <b>Cell:</b>           | <b>a</b> 19.881(0) | <b>b</b> 19.881(0)                | <b>c</b> 15.897(0) |
| <b>Space Group No.:</b> | 85   | <b>(Å, °)</b>          | <b>α</b> 90.00     | <b>β</b> 90.00                    | <b>γ</b> 90.00     |
| <b>R-Factor (%):</b>    | 7.64 | <b>Temperature(K):</b> | 200                | <b>Density(g/cm<sup>3</sup>):</b> | 1.308              |

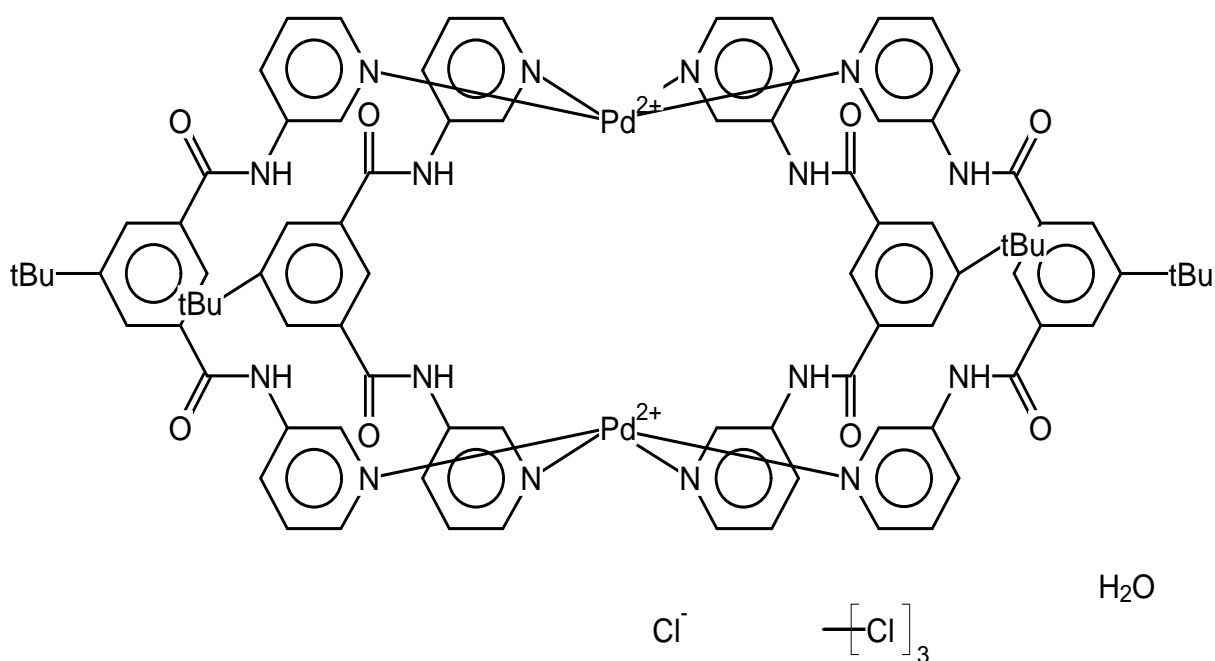

## Search Overview

**Search:** search33  
**Date/Time done:** Thu May 26 10:58:24 2011  
**Database(s):** CSD version 5.32 (November 2010)  
CSD version 5.32 updates (Nov 2010)  
**Restriction Info:** No refcode restrictions applied  
**Filters:** None  
**Percentage Completed:** 100%  
**Number of Hits:** 1

*Summary of queries used. Search found structures that:*

match

**Query 2**

**Query 3**

**Query 2**

4M

**Query 3**

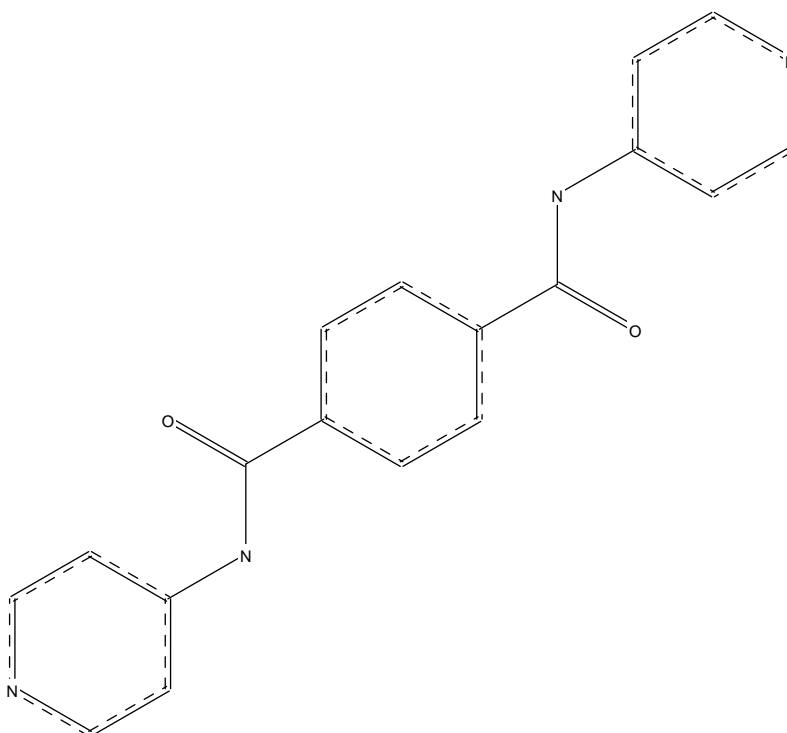



## Search: search33 (Thu May 26 10:58:24 2011): Hit 1

### JAPHAK

**Reference:** Linke Li, Yinglin Song, Hongwei Hou, Zhishan Liu, Yaoting Fan, Yu Zhu (2005) *Inorg.Chim.Acta*, **358**,3259

**Formula:** (C<sub>18</sub> H<sub>14</sub> Hg<sub>1</sub> I<sub>2</sub> N<sub>4</sub> O<sub>2</sub>)<sub>n</sub>, 1.5n(C<sub>1</sub> H<sub>4</sub> O<sub>1</sub>)

**Compound Name:** catena-((μ<sub>2</sub>-transoid-N,N'-bis(4-Pyridyl)-1,4-benzenedicarboxamide-N,N')-bis(iodo)-mercury(ii) methanol solvate)

**Space Group:** C2/c      **Cell:**      **a** 32.376(7)      **b** 5.736(1)      **c** 30.667(6)  
**Space Group No.:** 15      **(Å, °)**      **α** 90.00      **β** 115.11(3)      **γ** 90.00

**R-Factor (%):** 5.06      **Temperature(K):** 291      **Density(g/cm<sup>3</sup>):** 2.115

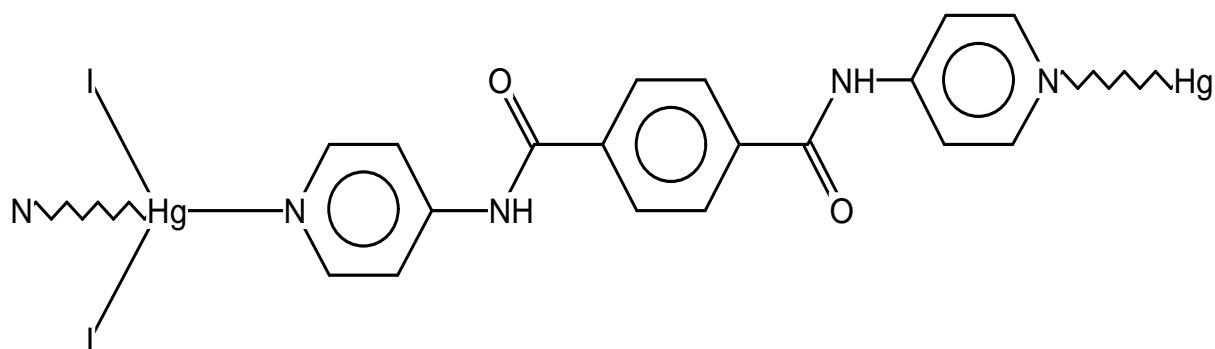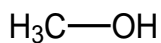

## Search Overview

**Search:** search34  
**Date/Time done:** Thu May 26 11:00:08 2011  
**Database(s):** CSD version 5.32 (November 2010)  
CSD version 5.32 updates (Nov 2010)  
**Restriction Info:** No refcode restrictions applied  
**Filters:** None  
**Percentage Completed:** 100%  
**Number of Hits:** 2

*Summary of queries used. Search found structures that:*

match

**Query 2**

**Query 3**

**Query 2**

4M

**Query 3**

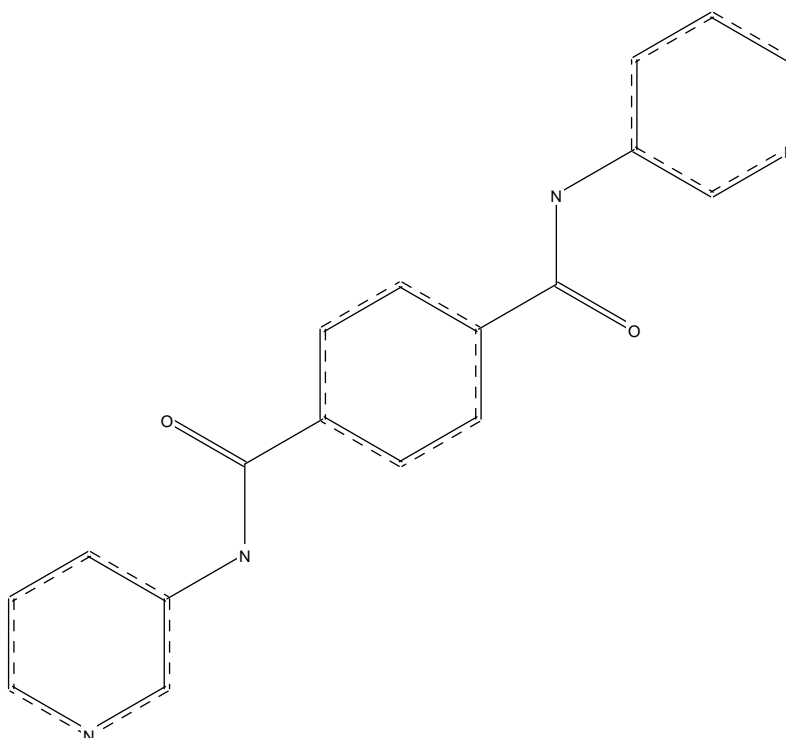

## Search: search34 (Thu May 26 11:00:08 2011): Hit 1

UHIYIU

**Reference:** L.Rajput, K.Biradha (2009) *CrystEngComm* ,11,1220

**Formula:**  $(C_{38} H_{28} Cu_1 N_{10} O_4 S_2)_n, 2n(C_7 H_5 N_1)$

**Compound Name:** catena-(bis( $\mu_2$ -N,N'-bis(3-Pyridyl)benzene-1,4-dicarboxamide-N,N')-bis(isothiocyanato)-copper(ii) bis(benzonitrile) clathrate)

**Space Group:** P-1      **Cell:**      **a** 8.194(0)      **b** 10.001(0)      **c** 14.822(1)

**Space Group No.:** 2      **(Å, °)**       $\alpha$  75.66(0)       $\beta$  85.55(0)       $\gamma$  85.29(0)

**R-Factor (%):** 4.41      **Temperature(K):** 293      **Density(g/cm<sup>3</sup>):** 1.450

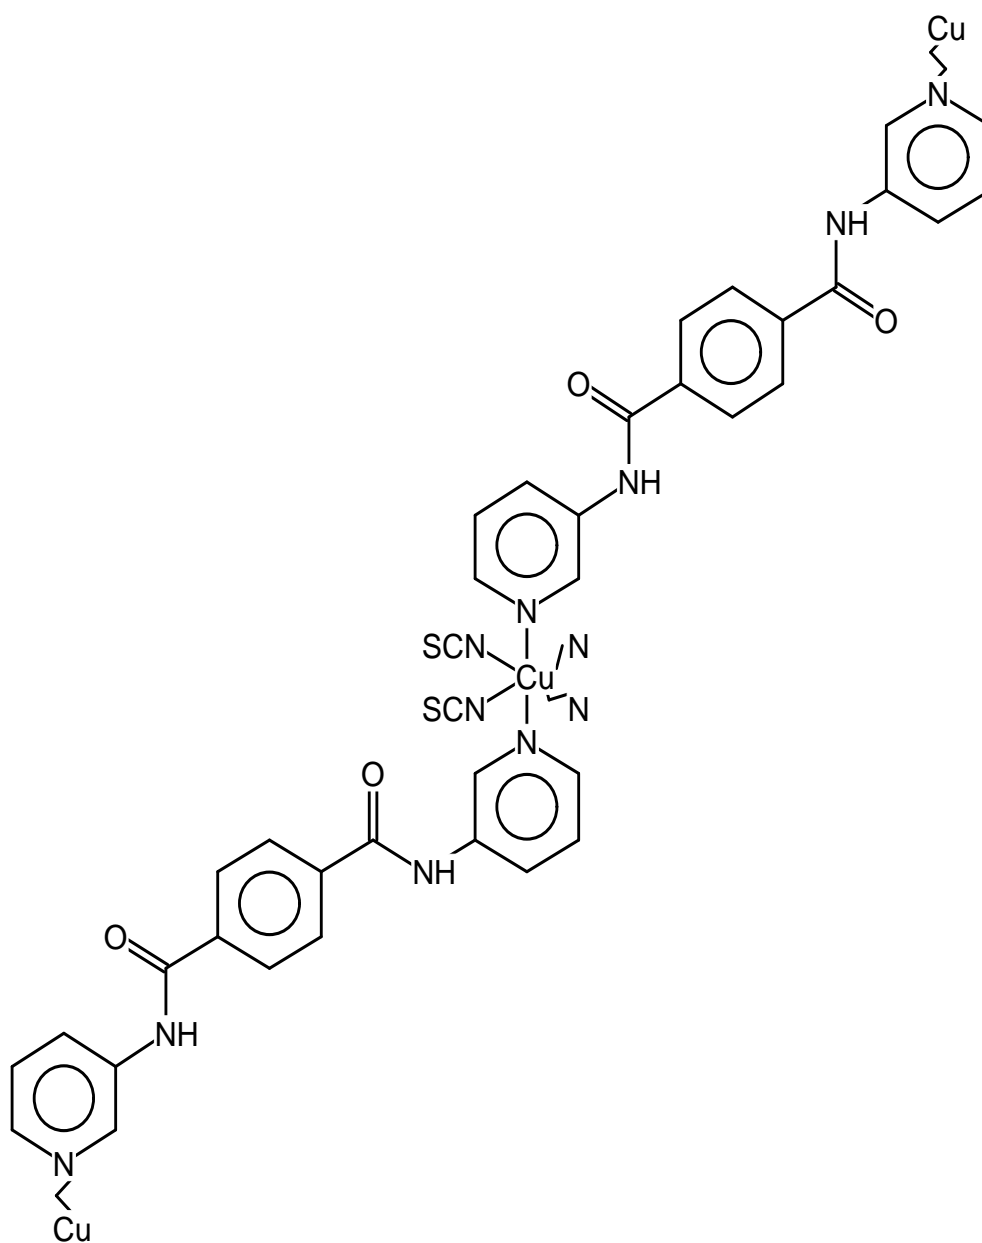

Ph—CN

## Search: search34 (Thu May 26 11:00:08 2011): Hit 2

### PUNSAT

**Reference:** N.N.Adarsh, P.Dastidar (2010) *Cryst.Growth Des.* ,**10**,483

**Formula:** (C<sub>18</sub> H<sub>14</sub> N<sub>4</sub> O<sub>6</sub> S<sub>1</sub> Zn<sub>1</sub>)<sub>n</sub>,n(H<sub>2</sub> O<sub>1</sub>)

**Compound Name:** catena-((μ<sub>2</sub>-N,N'-bis(Pyridin-3-yl)terephthalamide-N,N')-(μ<sub>2</sub>-sulfato)-zinc monohydrate)

**Space Group:** P21      **Cell:**      **a** 4.990(1)      **b** 19.473(7)      **c** 9.891(3)

**Space Group No.:** 4      **(Å, °)**      **α** 90.00      **β** 93.76(0)      **γ** 90.00

**R-Factor (%):** 3.18      **Temperature(K):** 298      **Density(g/cm<sup>3</sup>):** 1.724

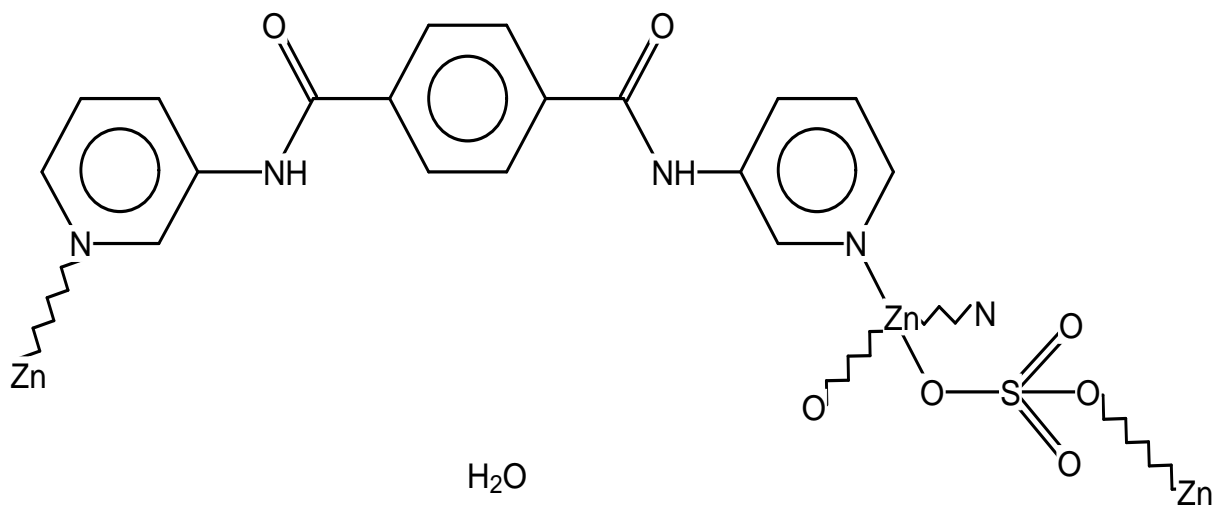

## Search Overview

**Search:** search36  
**Date/Time done:** Thu May 26 11:04:57 2011  
**Database(s):** CSD version 5.32 (November 2010)  
CSD version 5.32 updates (Nov 2010)  
**Restriction Info:** No refcode restrictions applied  
**Filters:** None  
**Percentage Completed:** 100%  
**Number of Hits:** 15

*Summary of queries used. Search found structures that:*

match

**Query 2**

**Query 3**

**Query 2**

4M

**Query 3**

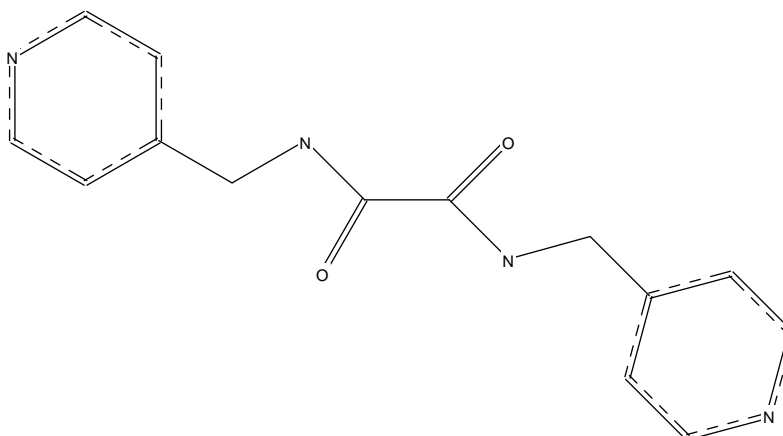

## Search: search36 (Thu May 26 11:04:57 2011): Hit 1

CICYUJ

**Reference:** Gene-Hsiang Lee, Hsin-Ta Wang (2007)  
*Acta Crystallogr., Sect. C: Cryst. Struct. Commun.* ,**63**,m216

**Formula:** (C<sub>14</sub> H<sub>14</sub> Cl<sub>2</sub> Co<sub>1</sub> N<sub>4</sub> O<sub>2</sub>)<sub>n</sub>.0.5n(H<sub>2</sub> O<sub>1</sub>)

**Compound Name:** catena-[(μ<sub>2</sub>-N,N'-bis(4-Pyridylmethyl)oxalamide)-dichloro-cobalt(ii) hemihydrate]

**Space Group:** Pnna      **Cell:**      **a** 7.457(0)      **b** 11.857(0)      **c** 22.602(0)  
**Space Group No.:** 52      **(Å, °)**      α 90.00      β 90.00      γ 90.00

**R-Factor (%):** 6.02      **Temperature(K):** 150      **Density(g/cm<sup>3</sup>):** 1.360

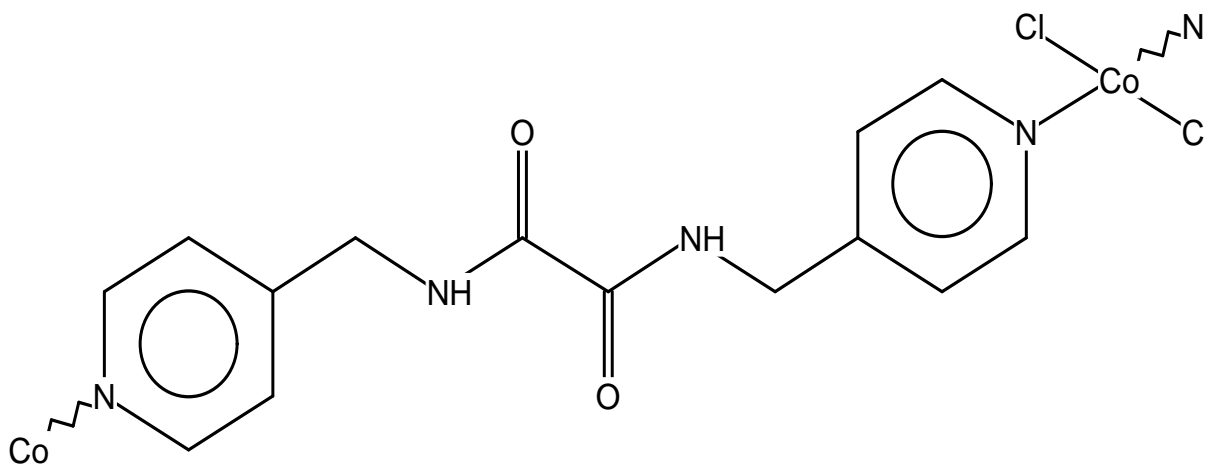

H<sub>2</sub>O

## Search: search36 (Thu May 26 11:04:57 2011): Hit 2

CIYZOA

**Reference:** Qingdao Zeng, Min Li, Dongxia Wu, Shengbin Lei,  
Caiming Liu, Lingyu Piao, Yanlian Yang, Shiyan An, Chen Wang  
(2008) *Cryst. Growth Des.* ,8,869

**Formula:** (C<sub>14</sub> H<sub>14</sub> Hg<sub>3</sub> I<sub>6</sub> N<sub>4</sub> O<sub>2</sub>)<sub>n</sub>

**Compound Name:** catena-[bis(μ<sub>2</sub>-Iodo)-(μ<sub>2</sub>-N,N'-bis(4-pyridylmethyl)oxalamido)-tetraiodo-  
tri-mercury(ii)]

|                         |       |                        |                   |                                   |                    |
|-------------------------|-------|------------------------|-------------------|-----------------------------------|--------------------|
| <b>Space Group:</b>     | P21/c | <b>Cell:</b>           | <b>a</b> 5.030(1) | <b>b</b> 13.731(3)                | <b>c</b> 20.220(4) |
| <b>Space Group No.:</b> | 14    | (Å, °)                 | α 90.00           | β 92.19(3)                        | γ 90.00            |
| <b>R-Factor (%):</b>    | 5.37  | <b>Temperature(K):</b> | 293               | <b>Density(g/cm<sup>3</sup>):</b> | 3.887              |

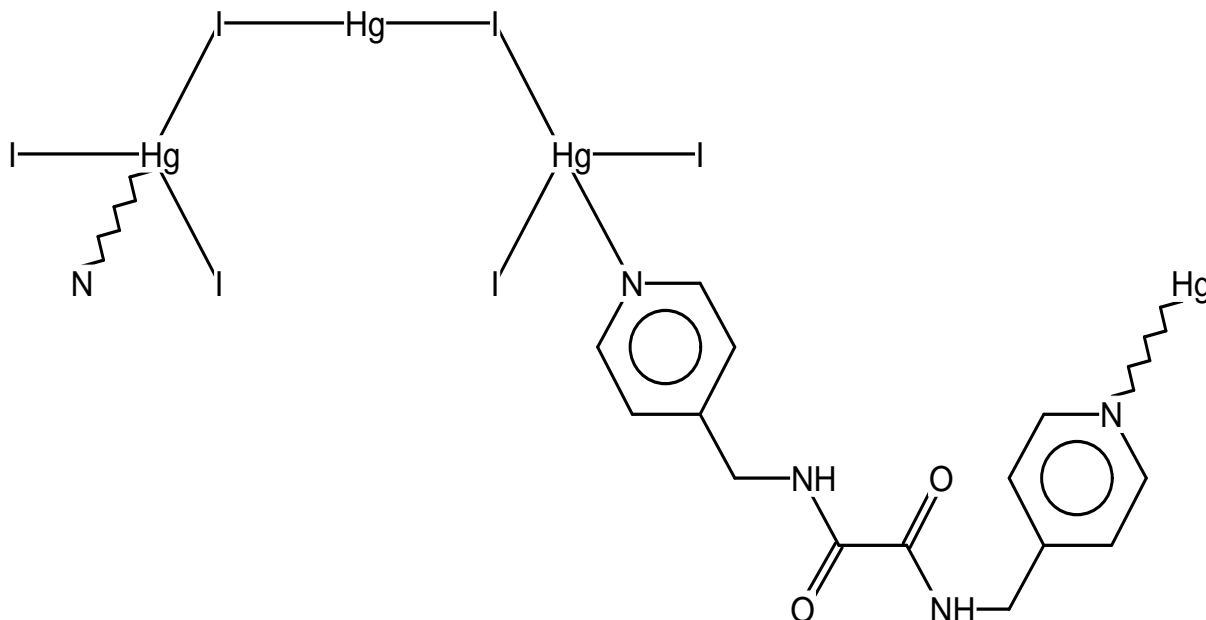

## Search: search36 (Thu May 26 11:04:57 2011): Hit 3

### HECRAJ

**Reference:** Biing-Chiau Tzeng, Hsien-Te Yeh, Ya-Ling Wu, Jau-Huei Kuo, Gene-Hsiang Lee, Shie-Ming Peng (2006) *Inorg.Chem.* , **45**,591

**Formula:** C<sub>78</sub> H<sub>72</sub> Au<sub>4</sub> N<sub>8</sub> O<sub>4</sub> P<sub>4</sub> 4+,4(Cl<sub>1</sub> O<sub>4</sub> 1-),4(C<sub>4</sub> H<sub>10</sub> O<sub>1</sub>)

**Compound Name:** bis(μ<sub>2</sub>-N,N'-bis(4-Pyridylmethyl)oxalamide-N'',N''')-bis(μ<sub>2</sub>-bis(diphenylphosphino)methane-P,P')-tetra-gold(i) tetraperchlorate diethyl ether solvate

|                         |      |                        |                    |                                   |                    |
|-------------------------|------|------------------------|--------------------|-----------------------------------|--------------------|
| <b>Space Group:</b>     | P-1  | <b>Cell:</b>           | <b>a</b> 13.178(0) | <b>b</b> 14.576(0)                | <b>c</b> 15.409(0) |
| <b>Space Group No.:</b> | 2    | (Å, °)                 | α 88.39(0)         | β 83.19(0)                        | γ 67.52(0)         |
| <b>R-Factor (%):</b>    | 5.86 | <b>Temperature(K):</b> | 150                | <b>Density(g/cm<sup>3</sup>):</b> | 1.707              |

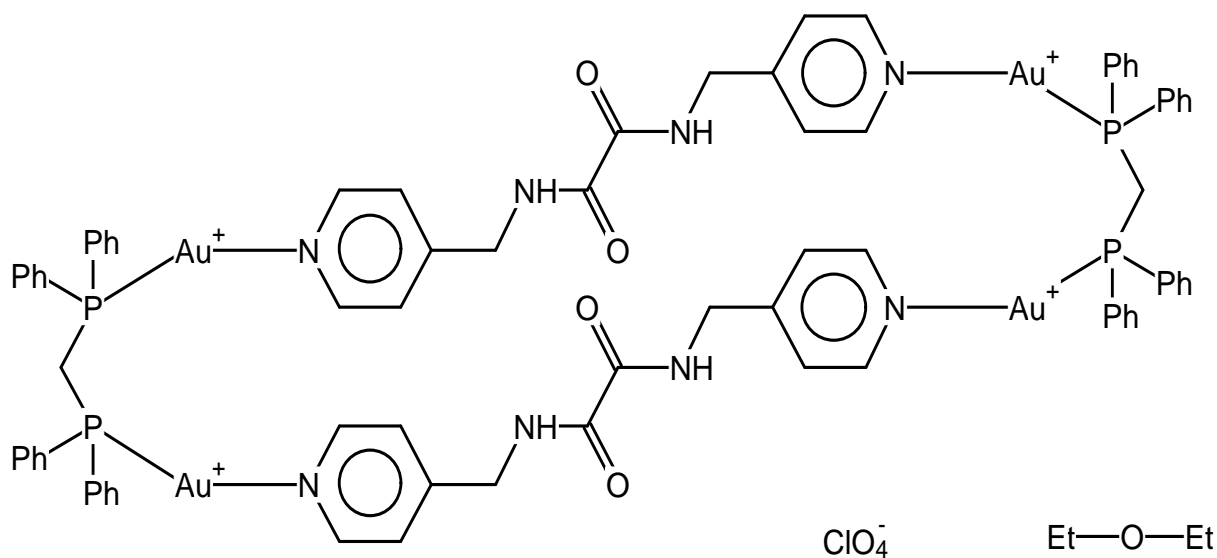



## Search: search36 (Thu May 26 11:04:57 2011): Hit 4

### HECREN

**Reference:** Biing-Chiau Tzeng, Hsien-Te Yeh, Ya-Ling Wu, Jau-Huei Kuo, Gene-Hsiang Lee, Shie-Ming Peng (2006) *Inorg.Chem.* , 45,591

**Formula:**  $C_{82} H_{80} Au_4 N_8 O_4 P_4^{4+}, 4(Cl_1 O_4^{1-}), 4(C_2 H_6 O_1), 2(H_2 O_1)$

**Compound Name:** bis( $\mu_2$ -N,N'-bis(4-Pyridylmethyl)oxalamide-N'',N''')-bis( $\mu_2$ -1,3-bis(diphenylphosphino)propane-P,P')-tetra-gold(i) tetraperchlorate ethanol solvate dihydrate

**Space Group:** P21/c      **Cell:**      **a** 14.603(0)      **b** 26.136(0)      **c** 15.000(0)  
**Space Group No.:** 14      **(Å, °)**       $\alpha$  90.00       $\beta$  119.01(0)       $\gamma$  90.00

**R-Factor (%):** 4.90      **Temperature(K):** 150      **Density(g/cm<sup>3</sup>):** 1.838

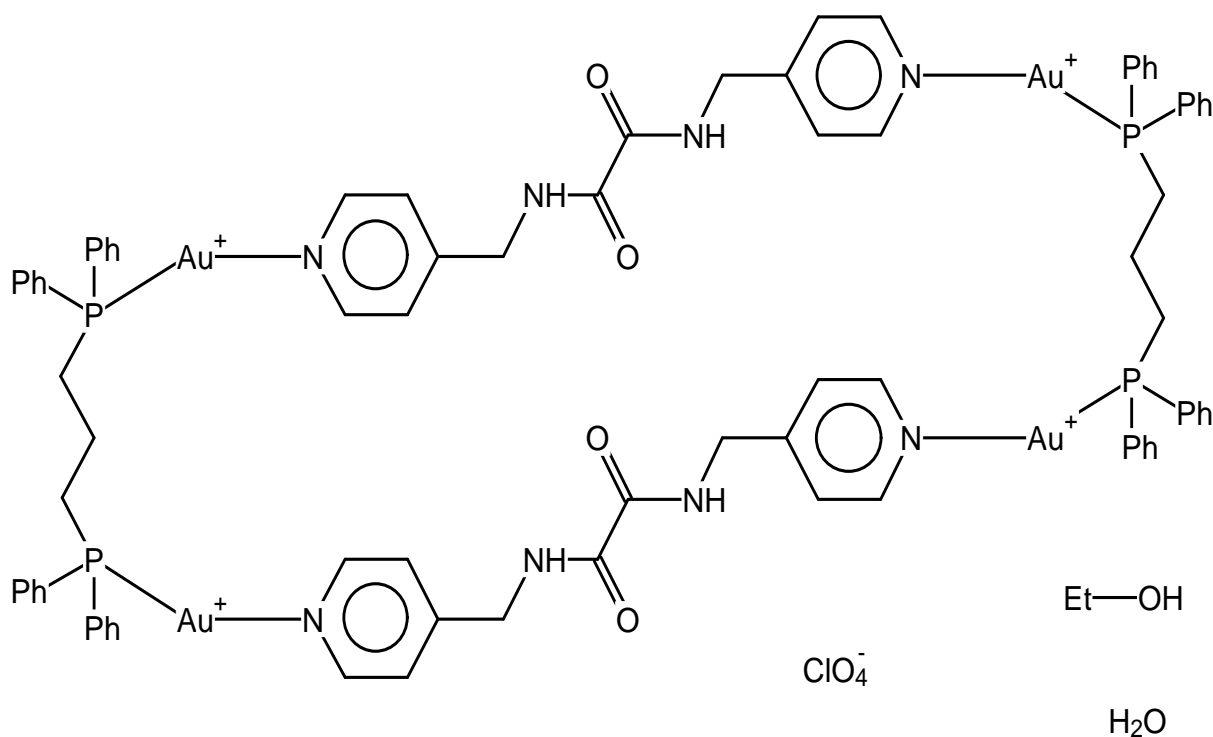

## Search: search36 (Thu May 26 11:04:57 2011): Hit 5

### HECRIR

**Reference:** Biing-Chiau Tzeng, Hsien-Te Yeh, Ya-Ling Wu, Jau-Huei Kuo, Gene-Hsiang Lee, Shie-Ming Peng (2006) *Inorg.Chem.* , 45,591

**Formula:**  $(C_{43}H_{44}Au_2N_4O_2P_2^{2+})_n, 2n(F_6P_1^{-}), 0.57n(C_1H_4O_1), 1.43n(C_3H_7N_1O_1), 0.29n(H_2O)$

**Compound Name:** catena-(( $\mu_2$ -N,N'-bis(4-Pyridylmethyl)oxalamide-N'',N''')-( $\mu_2$ -1,5-bis(diphenylphosphino)pentane-P,P')-di-gold(i) bis(hexafluorophosphate) methanol N,N-dimethylformamide solvate hydrate)

|                         |      |                        |                    |                                   |                    |
|-------------------------|------|------------------------|--------------------|-----------------------------------|--------------------|
| <b>Space Group:</b>     | C2/c | <b>Cell:</b>           | <b>a</b> 42.804(1) | <b>b</b> 30.992(0)                | <b>c</b> 31.232(0) |
| <b>Space Group No.:</b> | 15   | <b>(Å, °)</b>          | $\alpha$ 90.00     | $\beta$ 106.50(0)                 | $\gamma$ 90.00     |
| <b>R-Factor (%):</b>    | 8.20 | <b>Temperature(K):</b> | 150                | <b>Density(g/cm<sup>3</sup>):</b> | 1.782              |

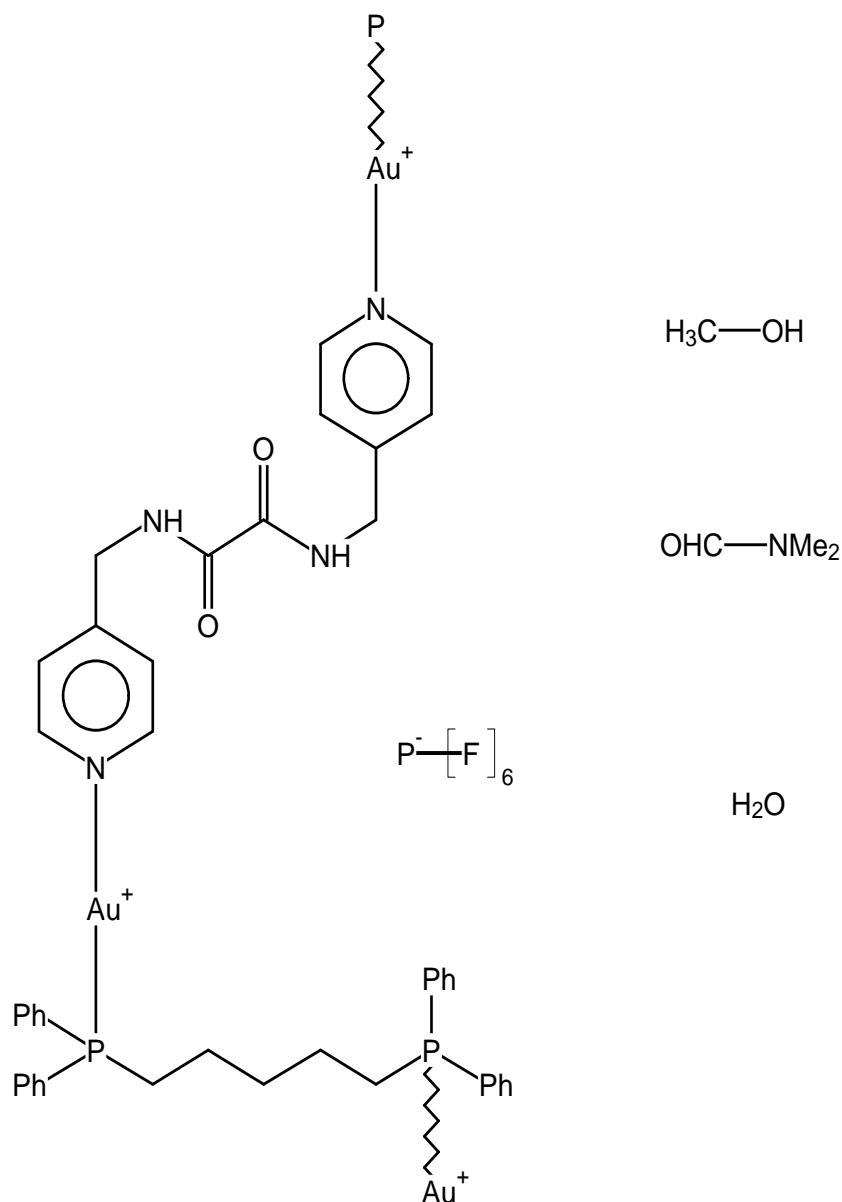

## Search: search36 (Thu May 26 11:04:57 2011): Hit 6

### HECROX

**Reference:** Biing-Chiau Tzeng, Hsien-Te Yeh, Ya-Ling Wu, Jau-Huei Kuo, Gene-Hsiang Lee, Shie-Ming Peng (2006) *Inorg.Chem.* , 45,591

**Formula:**  $C_{50} H_{44} Au_2 N_4 O_2 P_2^{2+}, 2(Cl_1 O_4^{1-})$

**Compound Name:** ( $\mu_2$ -N,N'-bis(4-Pyridylmethyl)oxalamide-N'',N''')-bis(triphenylphosphine)-di-gold(i) diperchlorate

**Space Group:** P-1      **Cell:**      **a** 9.661(1)      **b** 10.641(2)      **c** 13.856(3)

**Space Group No.:** 2      **(Å, °)**       $\alpha$  73.87(0)       $\beta$  76.23(0)       $\gamma$  67.15(0)

**R-Factor (%):** 3.62      **Temperature(K):** 273      **Density(g/cm<sup>3</sup>):** 1.847

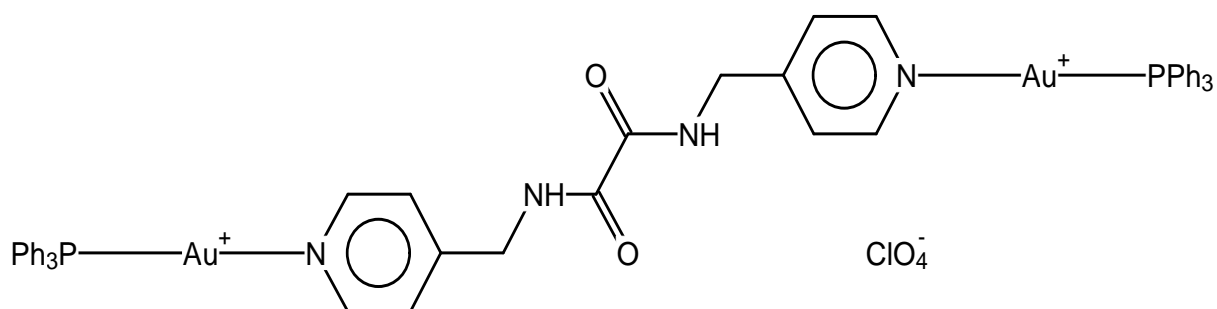

## Search: search36 (Thu May 26 11:04:57 2011): Hit 7

### HEYCUK

**Reference:** Biing-Chiau Tzeng, Yung-Chi Huang, Bo-So Chen, Wan-Min Wu, Shih-Yang Lee, Gene-Hsiang Lee, Shie-Ming Peng (2007) *Inorg.Chem.*, **46**,186

**Formula:** (C<sub>18</sub> H<sub>22</sub> Cd<sub>1</sub> N<sub>4</sub> O<sub>7</sub>)<sub>n</sub>

**Compound Name:** catena-((μ<sub>2</sub>-anti-N,N'-bis(4-Pyridylmethyl)oxalamide)-bis(acetato)-aqua-cadmium(ii))

|                         |      |                        |                    |                                   |                   |
|-------------------------|------|------------------------|--------------------|-----------------------------------|-------------------|
| <b>Space Group:</b>     | C2/c | <b>Cell:</b>           | <b>a</b> 16.245(1) | <b>b</b> 15.472(1)                | <b>c</b> 8.834(0) |
| <b>Space Group No.:</b> | 15   | (Å, °)                 | α 90.00            | β 98.72(0)                        | γ 90.00           |
| <b>R-Factor (%):</b>    | 3.86 | <b>Temperature(K):</b> | 273                | <b>Density(g/cm<sup>3</sup>):</b> | 1.570             |

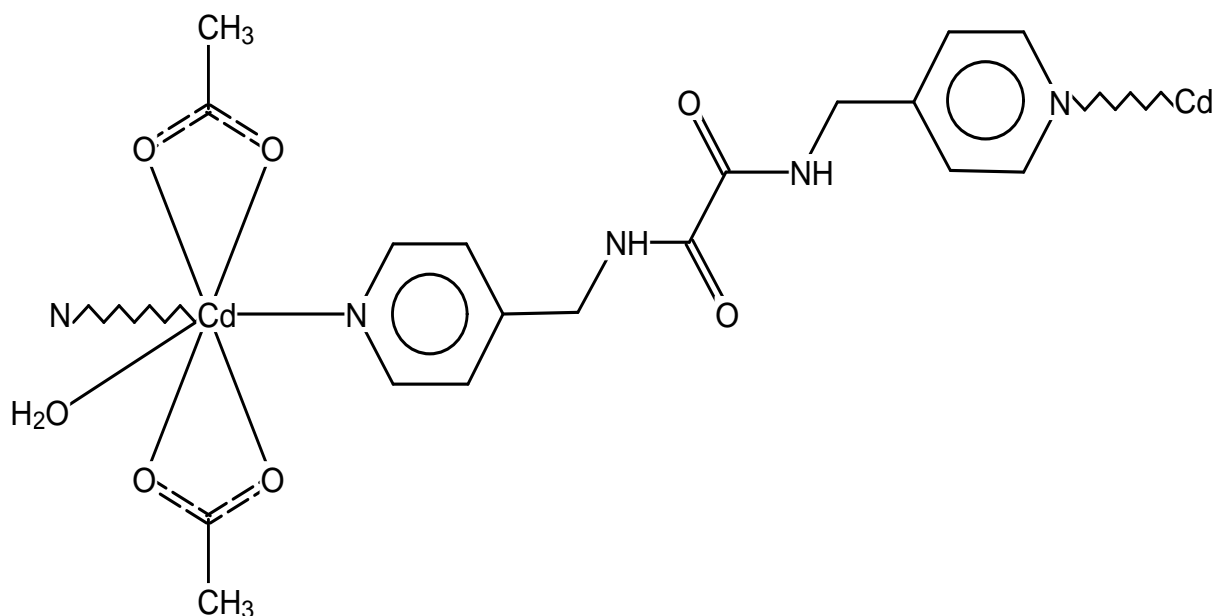

## Search: search36 (Thu May 26 11:04:57 2011): Hit 8

### HEYDAR

**Reference:** Biing-Chiau Tzeng, Yung-Chi Huang, Bo-So Chen, Wan-Min Wu, Shih-Yang Lee, Gene-Hsiang Lee, Shie-Ming Peng (2007) *Inorg.Chem.*, **46**,186

**Formula:** (C<sub>42</sub> H<sub>42</sub> Cd<sub>2</sub> N<sub>16</sub> O<sub>18</sub>)<sub>n</sub>

**Compound Name:** catena-(tris(μ<sub>2</sub>-anti-N,N'-bis(4-Pyridylmethyl)oxalamide)-tetrakis(nitrato-O,O')-di-cadmium(ii))

|                         |       |                        |                    |                                   |                    |
|-------------------------|-------|------------------------|--------------------|-----------------------------------|--------------------|
| <b>Space Group:</b>     | P21/c | <b>Cell:</b>           | <b>a</b> 10.929(3) | <b>b</b> 11.975(3)                | <b>c</b> 19.959(5) |
| <b>Space Group No.:</b> | 14    | (Å, °)                 | α 90.00            | β 105.83(0)                       | γ 90.00            |
| <b>R-Factor (%):</b>    | 6.74  | <b>Temperature(K):</b> | 273                | <b>Density(g/cm<sup>3</sup>):</b> | 1.696              |

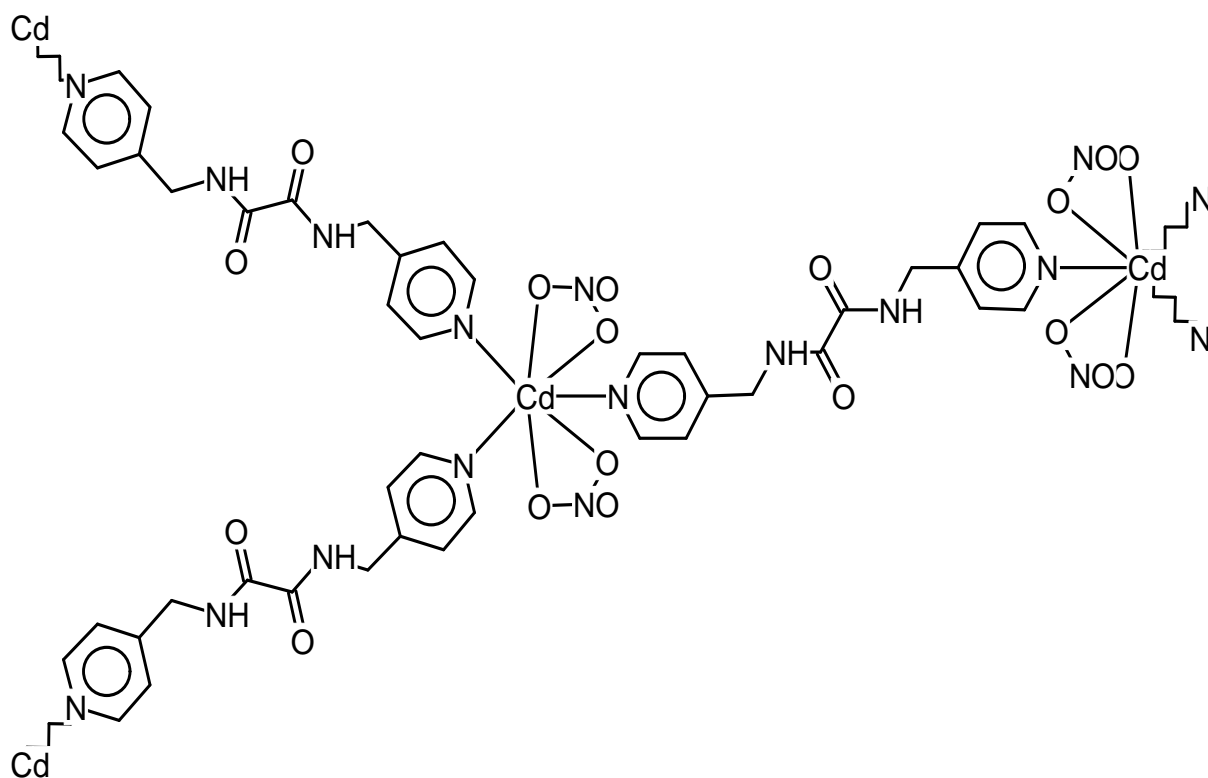

## Search: search36 (Thu May 26 11:04:57 2011): Hit 9

### HEYDIZ

**Reference:** Biing-Chiau Tzeng, Yung-Chi Huang, Bo-So Chen, Wan-Min Wu, Shih-Yang Lee, Gene-Hsiang Lee, Shie-Ming Peng (2007) *Inorg.Chem.*, **46**,186

**Formula:** (C<sub>14</sub> H<sub>14</sub> Cl<sub>2</sub> Cu<sub>1</sub> N<sub>4</sub> O<sub>2</sub>)<sub>n</sub>,2n(C<sub>1</sub> H<sub>4</sub> O<sub>1</sub>)

**Compound Name:** catena-(trans-(μ<sub>2</sub>-anti-N,N'-bis(4-Pyridylmethyl)oxalamide)-dichloro-copper(ii) methanol solvate)

|                         |      |                        |                    |                                   |                    |
|-------------------------|------|------------------------|--------------------|-----------------------------------|--------------------|
| <b>Space Group:</b>     | C2/c | <b>Cell:</b>           | <b>a</b> 17.559(0) | <b>b</b> 8.041(0)                 | <b>c</b> 15.914(0) |
| <b>Space Group No.:</b> | 15   | (Å, °)                 | α 90.00            | β 118.90(0)                       | γ 90.00            |
| <b>R-Factor (%):</b>    | 9.16 | <b>Temperature(K):</b> | 150                | <b>Density(g/cm<sup>3</sup>):</b> | 1.583              |

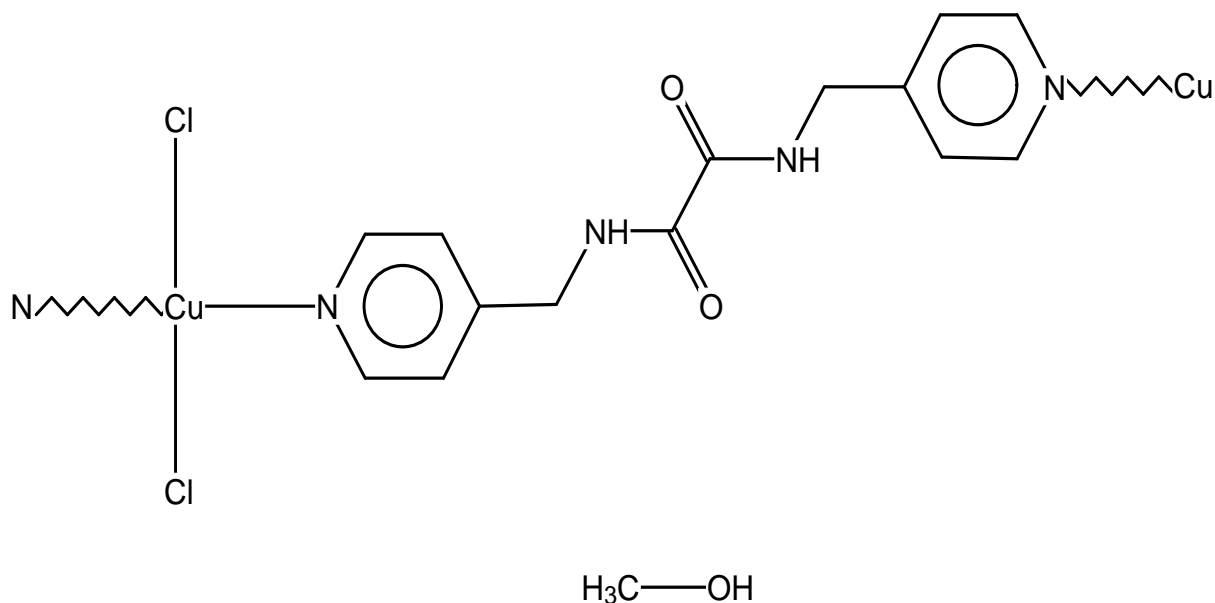

## Search: search36 (Thu May 26 11:04:57 2011): Hit 10

### HEYDOF

**Reference:** Biing-Chiau Tzeng, Yung-Chi Huang, Bo-So Chen, Wan-Min Wu, Shih-Yang Lee, Gene-Hsiang Lee, Shie-Ming Peng (2007) *Inorg.Chem.*, **46**,186

**Formula:**  $C_{50} H_{44} N_{10} O_4 Pd_2^{2+} \cdot 2(Cl_1 O_4^{1-}) \cdot 1.5(C_3 H_7 N_1 O_1) \cdot C_4 H_{10} O_1$

**Compound Name:** bis(( $\mu_2$ -syn-N,N'-bis(4-Pyridylmethyl)oxalamide)-(2-(2-pyridyl)phenyl)-palladium(ii)) perchlorate clathrate perchlorate dimethylformamide diethyl ether solvate

**Space Group:** P-1      **Cell:**    **a** 10.036(0)    **b** 17.964(0)    **c** 19.857(0)  
**Space Group No.:** 2      **(Å, °)**     $\alpha$  63.17(0)     $\beta$  85.07(0)     $\gamma$  76.88(0)  
**R-Factor (%):** 6.16      **Temperature(K):** 150      **Density(g/cm<sup>3</sup>):** 1.542

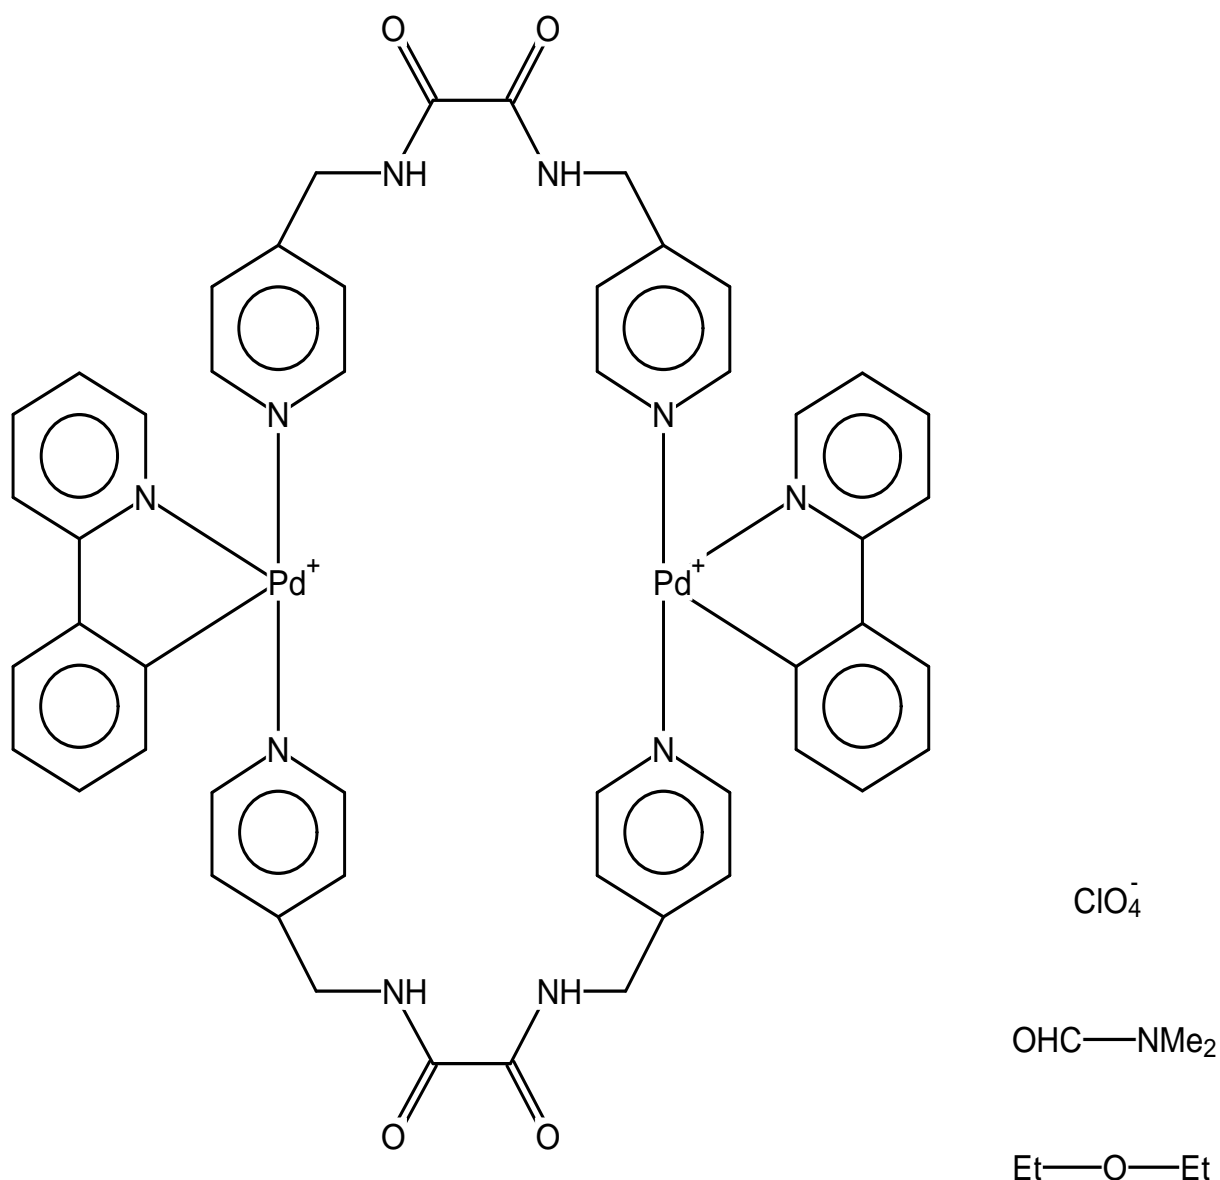

## Search: search36 (Thu May 26 11:04:57 2011): Hit 11

### PAVREK

**Reference:** Biing-Chiau Tzeng, Bo-So Chen, Shih-Yang Lee,  
Wei-Hsin Liu, Gene-Hsiang Lee, Shie-Ming Peng (2005)  
*New J.Chem.* ,**29**,1254

**Formula:** (C<sub>14</sub> H<sub>14</sub> Br<sub>2</sub> N<sub>4</sub> O<sub>2</sub> Zn<sub>1</sub>)<sub>n</sub>,2n(C<sub>1</sub> H<sub>4</sub> O<sub>1</sub>)

**Compound Name:** catena-((μ<sub>2</sub>-N,N'-bis(4-pyridylmethyl)oxalamide-N'',N''')-dibromo-zinc(ii)  
methanol solvate)

|                         |      |                        |                   |                                   |                    |
|-------------------------|------|------------------------|-------------------|-----------------------------------|--------------------|
| <b>Space Group:</b>     | Pnna | <b>Cell:</b>           | <b>a</b> 7.585(1) | <b>b</b> 12.155(1)                | <b>c</b> 22.829(3) |
| <b>Space Group No.:</b> | 52   | (Å, °)                 | α 90.00           | β 90.00                           | γ 90.00            |
| <b>R-Factor (%):</b>    | 3.39 | <b>Temperature(K):</b> | 150               | <b>Density(g/cm<sup>3</sup>):</b> | 1.766              |

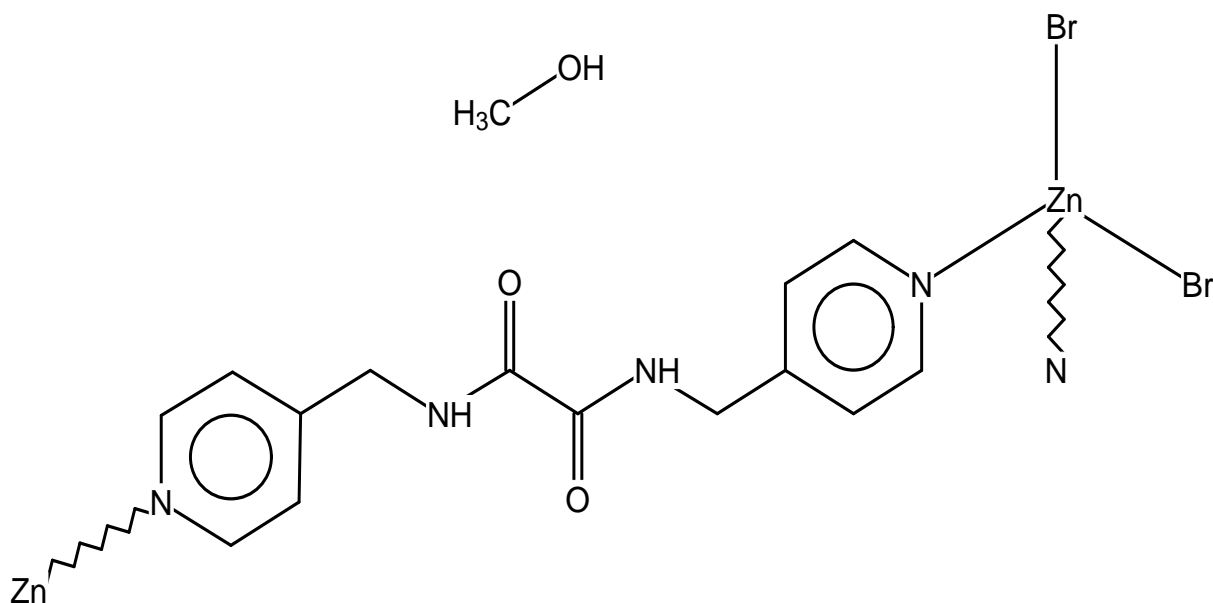



## Search: search36 (Thu May 26 11:04:57 2011): Hit 12

### PAVRIO

**Reference:** Biing-Chiau Tzeng, Bo-So Chen, Shih-Yang Lee, Wei-Hsin Liu, Gene-Hsiang Lee, Shie-Ming Peng (2005) *New J.Chem.* ,**29**,1254

**Formula:** (C<sub>14</sub> H<sub>14</sub> Cl<sub>2</sub> N<sub>4</sub> O<sub>2</sub> Zn<sub>1</sub>)<sub>n</sub>,2n(C<sub>1</sub> H<sub>4</sub> O<sub>1</sub>)

**Compound Name:** catena-((μ<sub>2</sub>-N,N'-bis(4-pyridylmethyl)oxalamide-N'',N''')-dichloro-zinc(ii) methanol solvate)

|                         |      |                        |                   |                                   |                    |
|-------------------------|------|------------------------|-------------------|-----------------------------------|--------------------|
| <b>Space Group:</b>     | Pnna | <b>Cell:</b>           | <b>a</b> 7.415(0) | <b>b</b> 11.822(0)                | <b>c</b> 22.706(0) |
| <b>Space Group No.:</b> | 52   | <b>(Å, °)</b>          | <b>α</b> 90.00    | <b>β</b> 90.00                    | <b>γ</b> 90.00     |
| <b>R-Factor (%):</b>    | 5.01 | <b>Temperature(K):</b> | 150               | <b>Density(g/cm<sup>3</sup>):</b> | 1.571              |

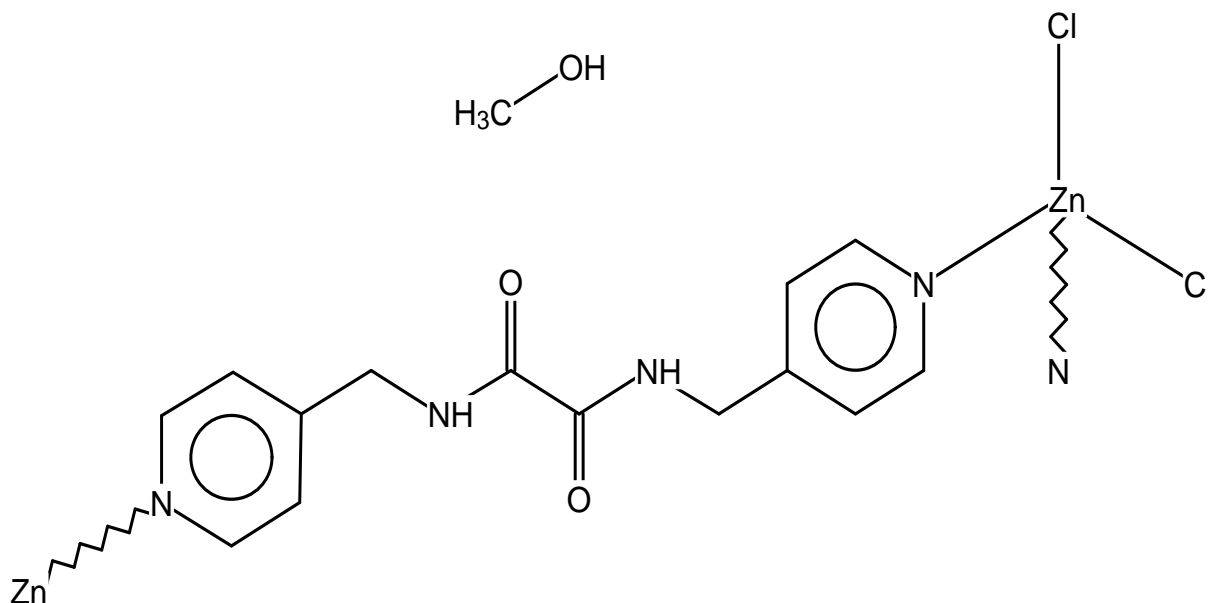

## Search: search36 (Thu May 26 11:04:57 2011): Hit 13

### PAVROU

**Reference:** Biing-Chiau Tzeng, Bo-So Chen, Shih-Yang Lee,  
Wei-Hsin Liu, Gene-Hsiang Lee, Shie-Ming Peng (2005)  
*New J.Chem.* ,**29**,1254

**Formula:** C<sub>28</sub> H<sub>28</sub> I<sub>4</sub> N<sub>8</sub> O<sub>4</sub> Zn<sub>2</sub>, C<sub>1</sub> H<sub>4</sub> O<sub>1</sub>

**Compound Name:** bis((μ<sub>2</sub>-N,N'-bis(4-pyridylmethyl)oxalamide-N'',N''')-diiodo-zinc(ii))  
methanol clathrate

|                         |      |                        |                    |                                   |                    |
|-------------------------|------|------------------------|--------------------|-----------------------------------|--------------------|
| <b>Space Group:</b>     | P-1  | <b>Cell:</b>           | <b>a</b> 8.232(0)  | <b>b</b> 10.948(0)                | <b>c</b> 12.033(0) |
| <b>Space Group No.:</b> | 2    | <b>(Å, °)</b>          | <b>α</b> 105.91(0) | <b>β</b> 96.54(0)                 | <b>γ</b> 102.91(0) |
| <b>R-Factor (%):</b>    | 3.14 | <b>Temperature(K):</b> | 150                | <b>Density(g/cm<sup>3</sup>):</b> | 2.013              |

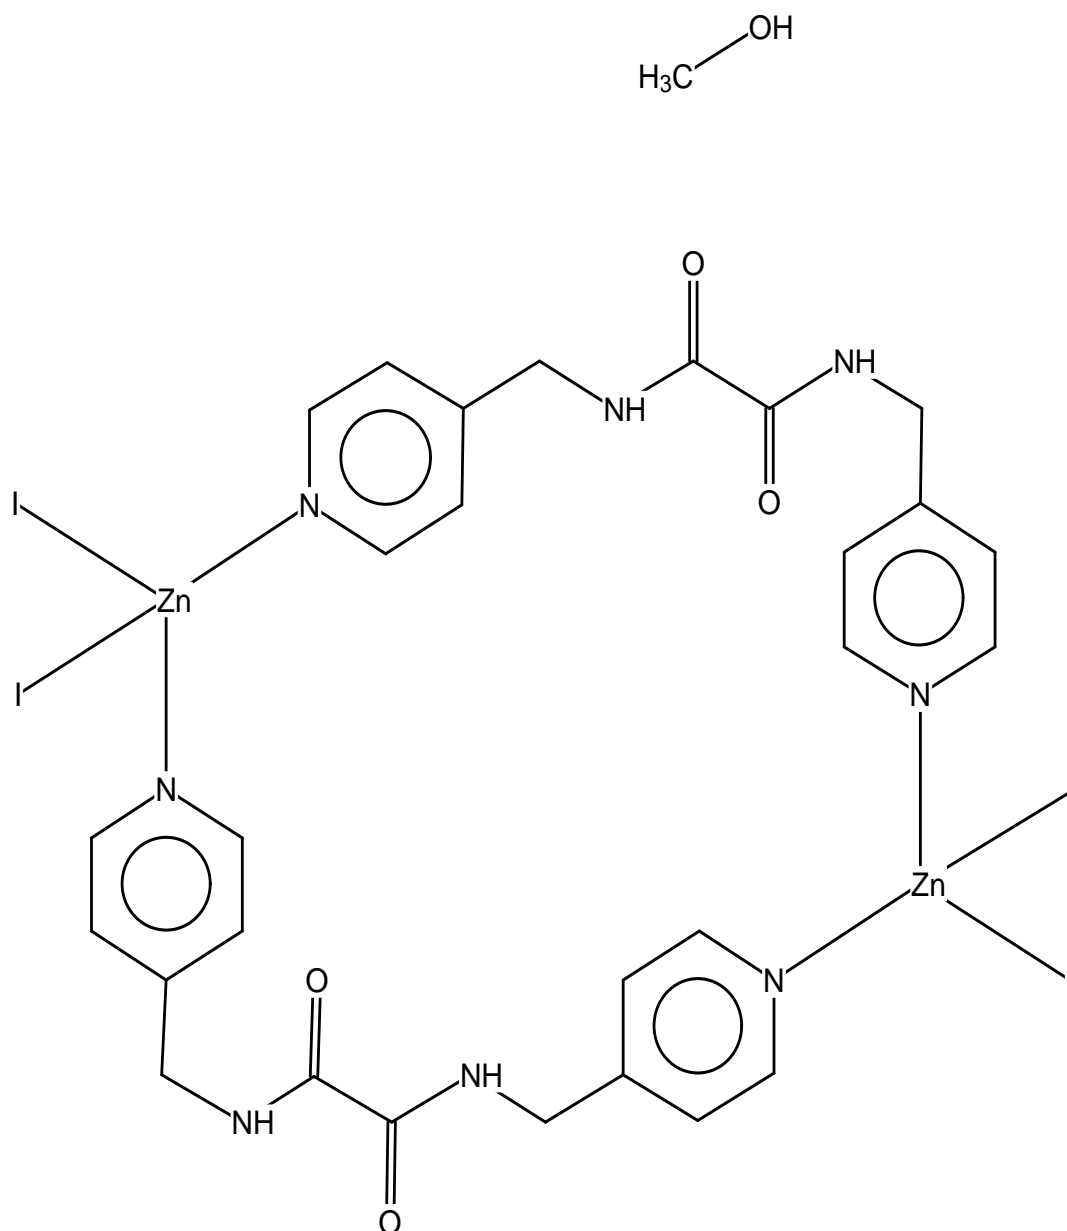

## Search: search36 (Thu May 26 11:04:57 2011): Hit 14

XEGYAK

**Reference:** C.L.Schauer, E.Matwey, F.W.Fowler, J.W.Lauher (1998)  
*Crystal Engineering*, 1, 213

**Formula:** (C<sub>14</sub> H<sub>14</sub> Ag<sub>1</sub> N<sub>4</sub> O<sub>2</sub><sup>1+</sup>)<sub>n</sub>, n(N<sub>1</sub> O<sub>3</sub><sup>1-</sup>)

**Compound Name:** catena-((μ<sub>2</sub>-N,N'-bis(4-Pyridylmethyl)oxalamide)-silver(i) nitrate)

**Space Group:** C2/c      **Cell:**      **a** 19.522(0)      **b** 9.705(2)      **c** 9.240(1)

**Space Group No.:** 15      **(Å, °)**      **α** 90.00      **β** 115.00(10)      **γ** 90.00

**R-Factor (%):** 5.10      **Temperature(K):** 295      **Density(g/cm<sup>3</sup>):** 1.843

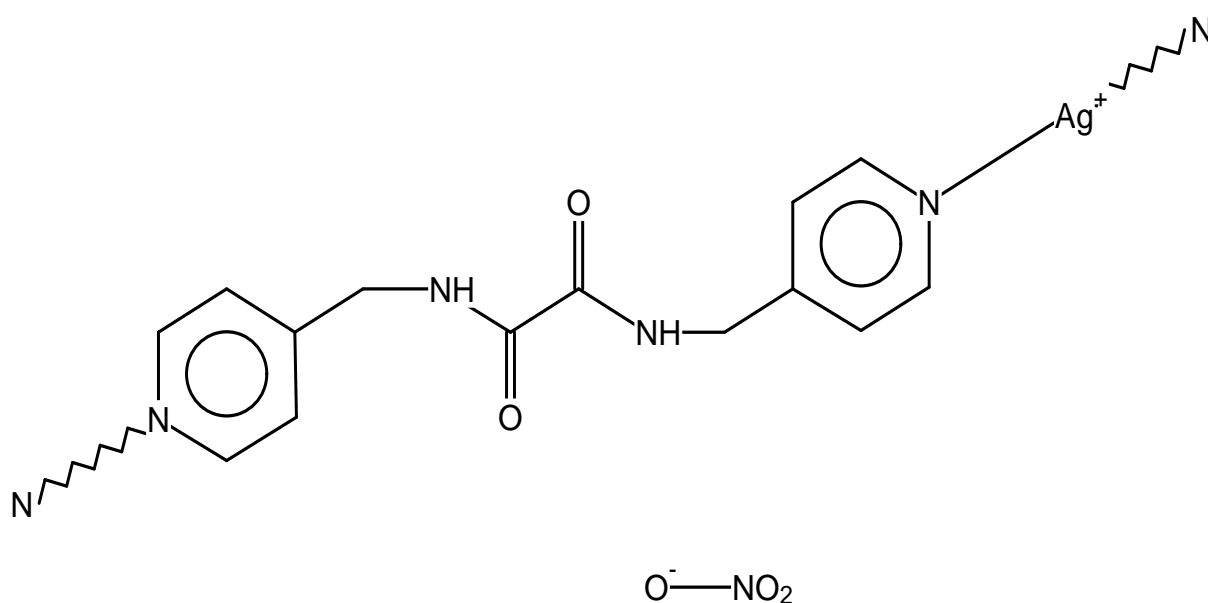

## Search: search36 (Thu May 26 11:04:57 2011): Hit 15

### XIYROM

**Reference:** C.S.A.Fraser, D.J.Eisler, M.C.Jennings, R.J.Puddephatt  
(2002) *Chem.Commun.* ,1224

**Formula:** C<sub>70</sub> H<sub>88</sub> N<sub>8</sub> O<sub>6</sub> Pt<sub>2</sub><sup>2+</sup>, 2(F<sub>6</sub> P<sub>1</sub><sup>1-</sup>), 1.5(C<sub>3</sub> H<sub>6</sub> O<sub>1</sub>)

**Compound Name:** (μ<sub>2</sub>-N,N'-bis(Pyridin-4-ylmethyl)oxalamide)-tetramethyl-bis((4,4'-di-t-butyl-2,2'-bipyridyl)-(4-carboxybenzyl)-platinum(iv))  
bis(hexafluorophosphate) acetone solvate

**Space Group:** P-1      **Cell:**      **a** 16.333(0)      **b** 16.609(0)      **c** 17.843(0)  
**Space Group No.:** 2      **(Å, °)**      **α** 98.68(0)      **β** 106.84(0)      **γ** 91.36(0)

**R-Factor (%):** 6.22      **Temperature(K):** 200      **Density(g/cm<sup>3</sup>):** 1.385

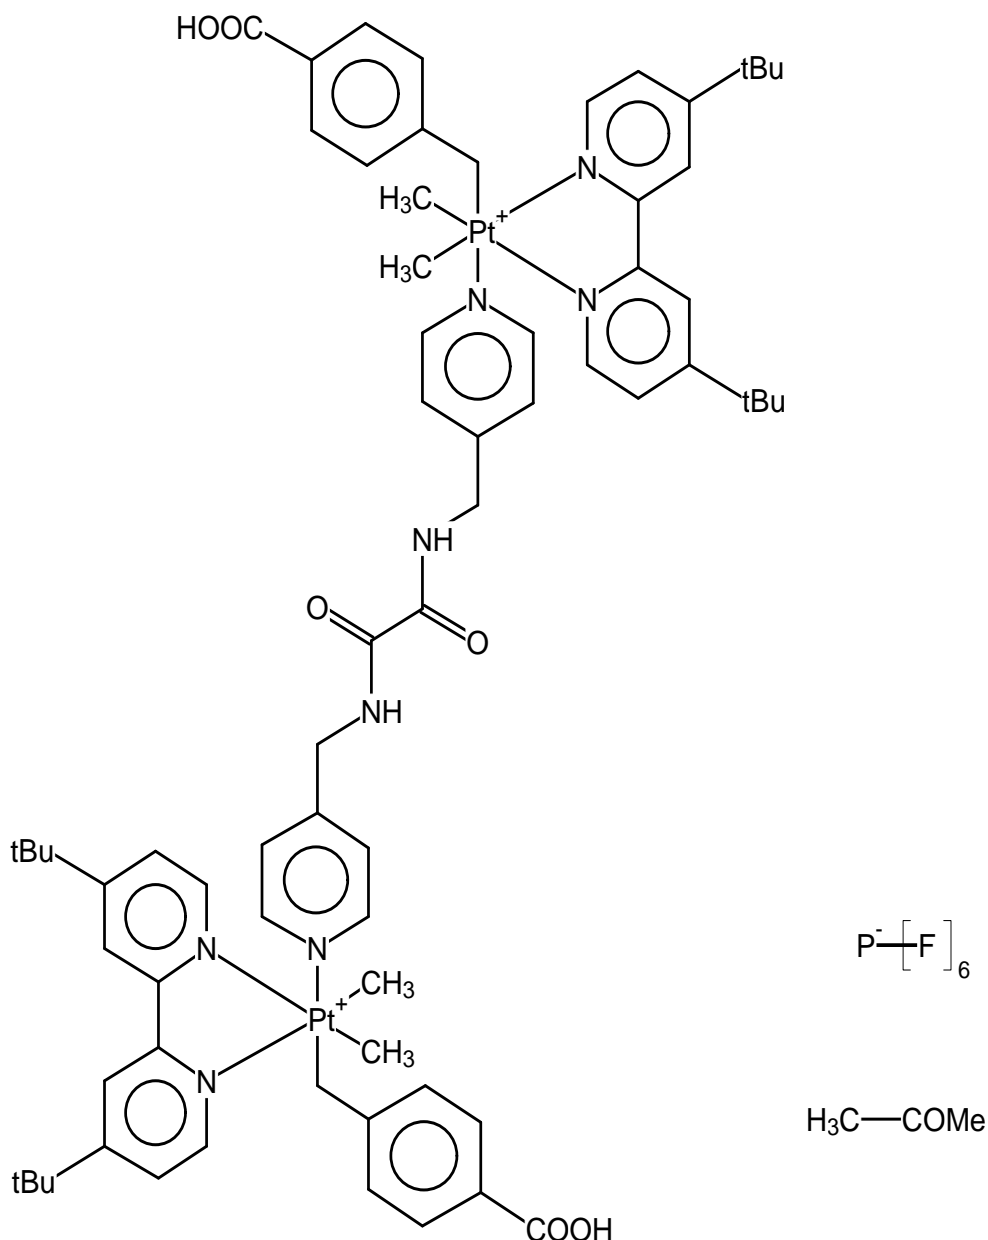

## Search Overview

**Search:** search37  
**Date/Time done:** Thu May 26 11:06:35 2011  
**Database(s):** CSD version 5.32 (November 2010)  
CSD version 5.32 updates (Nov 2010)  
**Restriction Info:** No refcode restrictions applied  
**Filters:** None  
**Percentage Completed:** 100%  
**Number of Hits:** 5

*Summary of queries used. Search found structures that:*

match

**Query 2**

**Query 3**

**Query 2**

4M

**Query 3**

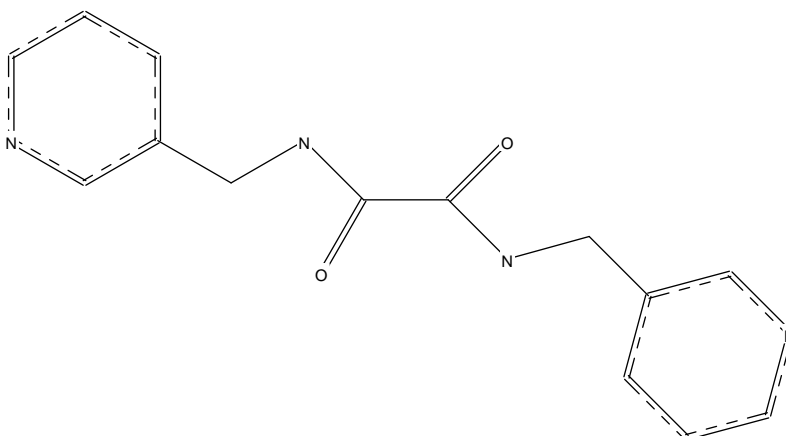

## Search: search37 (Thu May 26 11:06:35 2011): Hit 1

### CIYZUG

**Reference:** Qingdao Zeng, Min Li, Dongxia Wu, Shengbin Lei, Caiming Liu, Lingyu Piao, Yanlian Yang, Shiyuan An, Chen Wang (2008) *Cryst. Growth Des.* ,8,869

**Formula:**  $(C_{28} H_{28} Br_1 Cu_1 N_8 O_4^{1+})_n, n(Br_1^{-1-}), 2n(H_2 O_1)$

**Compound Name:** catena-[( $\mu_2$ -Bromo)-bis( $\mu_2$ -N,N'-bis(4-pyridylmethyl)oxalamido)-copper(ii) bromide dihydrate]

|                         |      |                        |                    |                                   |                    |
|-------------------------|------|------------------------|--------------------|-----------------------------------|--------------------|
| <b>Space Group:</b>     | P2/c | <b>Cell:</b>           | <b>a</b> 17.314(3) | <b>b</b> 5.363(1)                 | <b>c</b> 23.927(7) |
| <b>Space Group No.:</b> | 13   | (Å, °)                 | $\alpha$ 90.00     | $\beta$ 133.58(1)                 | $\gamma$ 90.00     |
| <b>R-Factor (%):</b>    | 4.79 | <b>Temperature(K):</b> | 293                | <b>Density(g/cm<sup>3</sup>):</b> | 1.651              |

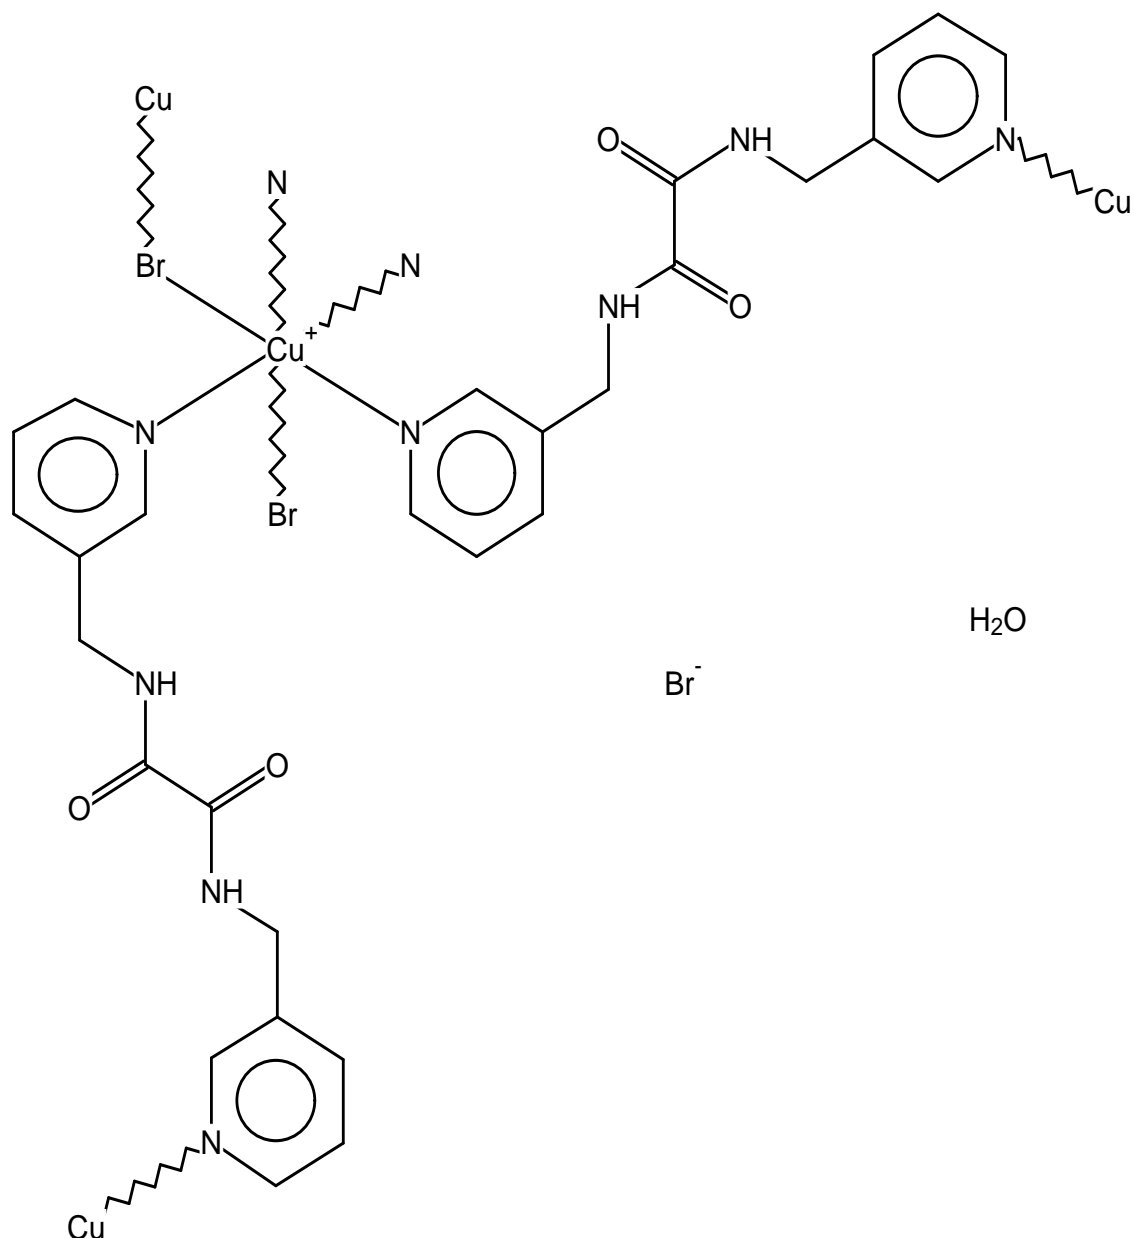

## Search: search37 (Thu May 26 11:06:35 2011): Hit 2

### IXOBOM

**Reference:** D.L.Reger, D.M.C.Smith, K.D.Shimizu, M.D.Smith (2004)  
*Polyhedron* ,23,711

**Formula:** (C<sub>14</sub> H<sub>19</sub> Cl<sub>3</sub> Eu<sub>1</sub> N<sub>4</sub> O<sub>4</sub> 1<sup>+</sup>)<sub>n</sub>,n(Cl<sub>1</sub> 1<sup>-</sup>)

**Compound Name:** catena-((μ<sub>2</sub>-N,N'-bis(3-pyridylmethyl)oxalamido)-trichloro-diaqua-europium chloride)

**Space Group:** P-1      **Cell:**    **a** 7.732(0)    **b** 11.337(0)    **c** 12.208(0)  
**Space Group No.:** 2      **(Å, °)**    **α** 94.83(0)    **β** 101.63(0)    **γ** 102.38(0)

**R-Factor (%):** 2.99      **Temperature(K):** 150      **Density(g/cm<sup>3</sup>):** 1.967

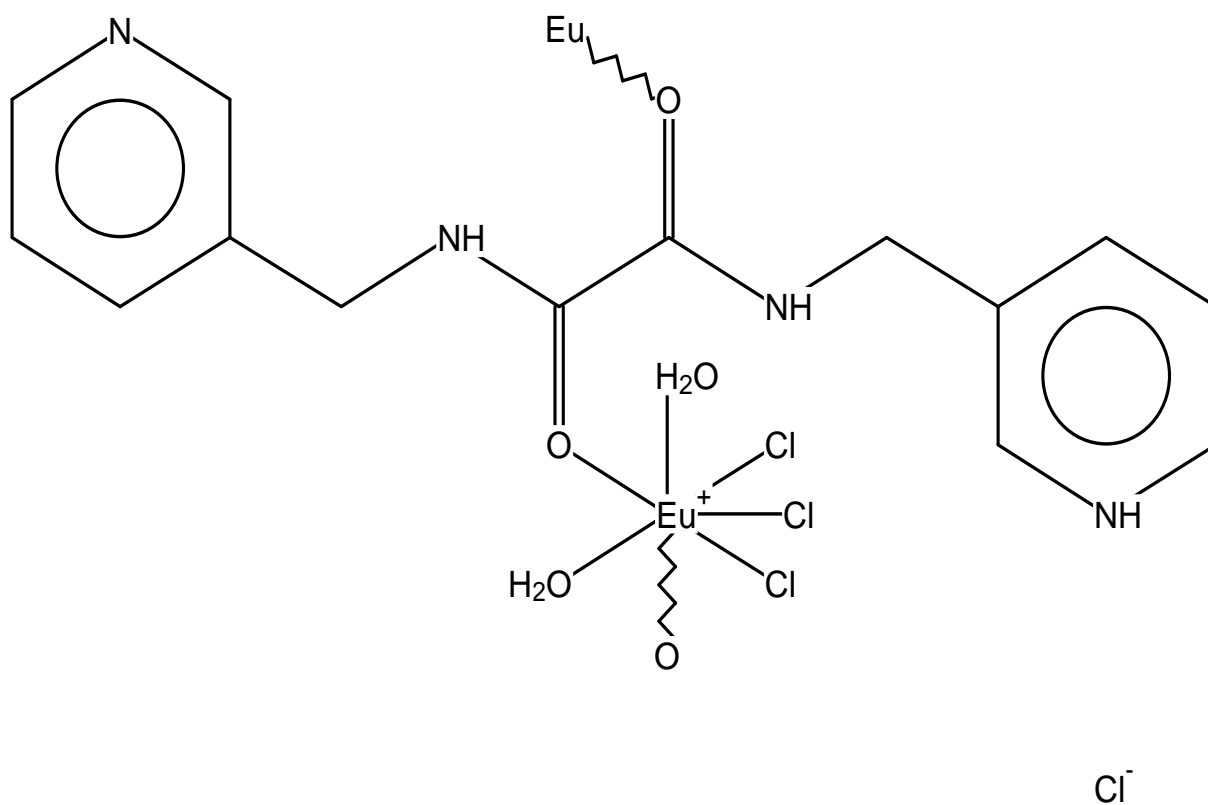

## Search: search37 (Thu May 26 11:06:35 2011): Hit 3

NOQSUH

**Reference:** C.L.Schauer, E.Matwey, F.W.Fowler, J.W.Lauher (1997)  
*J.Am.Chem.Soc.* ,**119**,10245

**Formula:** (C<sub>28</sub> H<sub>28</sub> Ag<sub>1</sub> N<sub>8</sub> O<sub>4</sub><sup>1+</sup>)<sub>n</sub>,n(N<sub>1</sub> O<sub>3</sub><sup>1-</sup>)

**Compound Name:** catena(bis(μ<sub>2</sub>-N,N'-bis(3-Pyridylmethyl)-oxaladiamide)-silver nitrate)

|                         |      |              |                    |                    |                   |
|-------------------------|------|--------------|--------------------|--------------------|-------------------|
| <b>Space Group:</b>     | P4/n | <b>Cell:</b> | <b>a</b> 16.869(2) | <b>b</b> 16.869(2) | <b>c</b> 5.123(1) |
| <b>Space Group No.:</b> | 85   | (Å, °)       | α 90.00            | β 90.00            | γ 90.00           |

|                      |      |                        |     |                                   |       |
|----------------------|------|------------------------|-----|-----------------------------------|-------|
| <b>R-Factor (%):</b> | 3.20 | <b>Temperature(K):</b> | 295 | <b>Density(g/cm<sup>3</sup>):</b> | 1.619 |
|----------------------|------|------------------------|-----|-----------------------------------|-------|

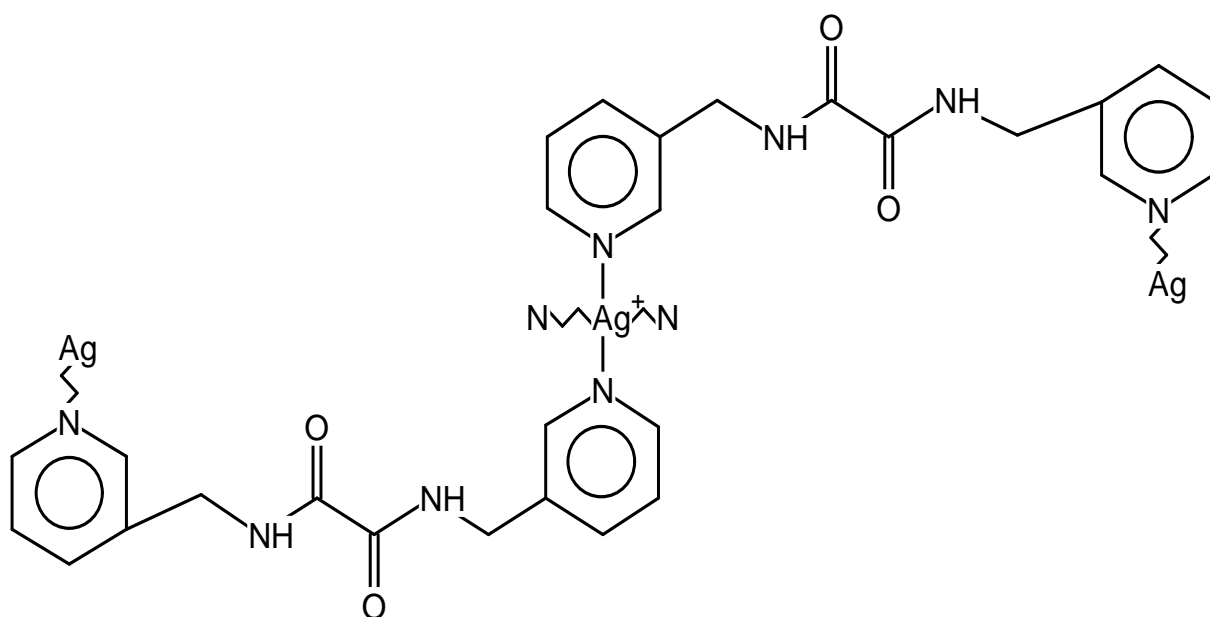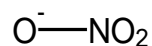



## Search: search37 (Thu May 26 11:06:35 2011): Hit 4

NOQTAO

**Reference:** C.L.Schauer, E.Matwey, F.W.Fowler, J.W.Lauher (1997)  
*J.Am.Chem.Soc.* ,**119**,10245

**Formula:** (C<sub>28</sub> H<sub>28</sub> Ag<sub>1</sub> N<sub>8</sub> O<sub>4</sub> 1<sup>+</sup>)<sub>n</sub>,n(B<sub>1</sub> F<sub>4</sub> 1<sup>-</sup>)

**Compound Name:** catena(bis(μ<sub>2</sub>-N,N'-bis(3-Pyridylmethyl)-oxaladiamide)-silver tetrafluoroborate)

|                         |      |                        |                    |                                   |                   |
|-------------------------|------|------------------------|--------------------|-----------------------------------|-------------------|
| <b>Space Group:</b>     | P4/n | <b>Cell:</b>           | <b>a</b> 16.957(3) | <b>b</b> 16.957(3)                | <b>c</b> 5.129(2) |
| <b>Space Group No.:</b> | 85   | <b>(Å, °)</b>          | <b>α</b> 90.00     | <b>β</b> 90.00                    | <b>γ</b> 90.00    |
| <b>R-Factor (%):</b>    | 6.80 | <b>Temperature(K):</b> | 295                | <b>Density(g/cm<sup>3</sup>):</b> | 1.656             |

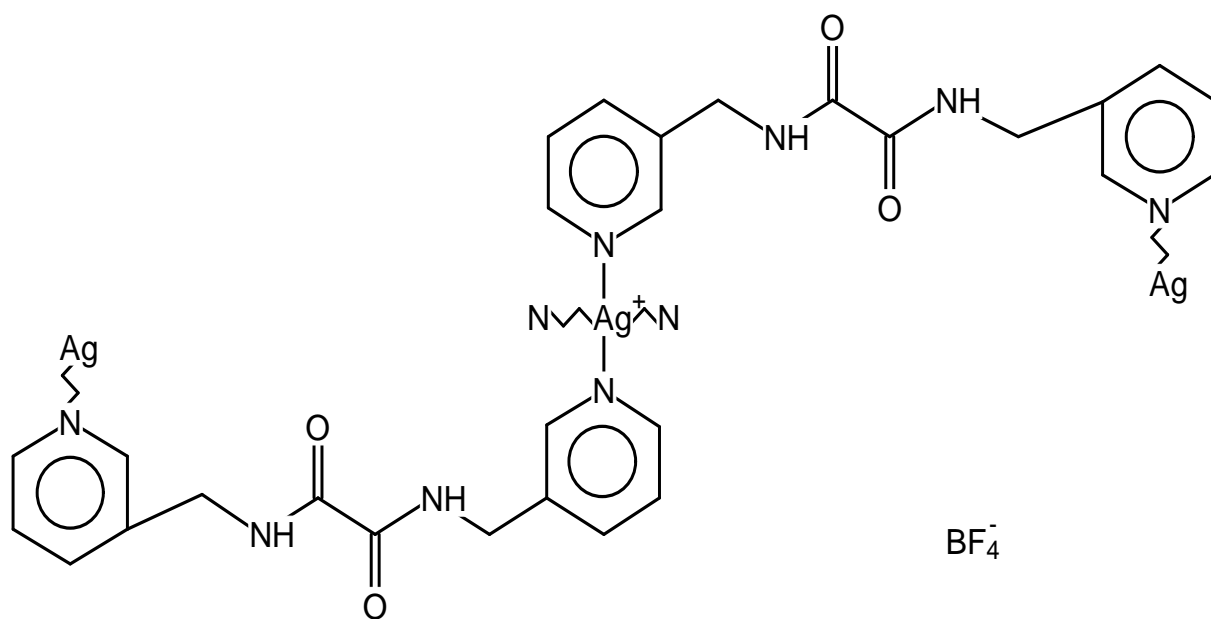

## Search: search37 (Thu May 26 11:06:35 2011): Hit 5

### XACDEL

**Reference:** Zengquan Qin, M.C.Jennings, R.J.Puddephatt (2003)  
*Inorg.Chem.* ,**42**,1956

**Formula:** C<sub>78</sub> H<sub>72</sub> N<sub>8</sub> O<sub>4</sub> P<sub>4</sub> Pd<sub>2</sub><sup>4+</sup>,4(C<sub>1</sub> F<sub>3</sub> O<sub>3</sub> S<sub>1</sub><sup>1-</sup>),2(C<sub>3</sub> H<sub>6</sub> O<sub>1</sub>)

**Compound Name:** bis( $\mu_2$ -N,N'-bis(3-Pyridylmethyl)oxaladiamide-N,N')-  
(bis(diphenylphosphino)methane-P,P')-di-palladium(ii)  
tetrakis(trifluoromethanesulfonate) acetone solvate

**Space Group:** P21/c      **Cell:**      **a** 19.037(0)      **b** 11.841(0)      **c** 21.906(0)  
**Space Group No.:** 14      **(Å, °)**       $\alpha$  90.00       $\beta$  95.42(0)       $\gamma$  90.00

**R-Factor (%):** 4.50      **Temperature(K):** 200      **Density(g/cm<sup>3</sup>):** 1.510

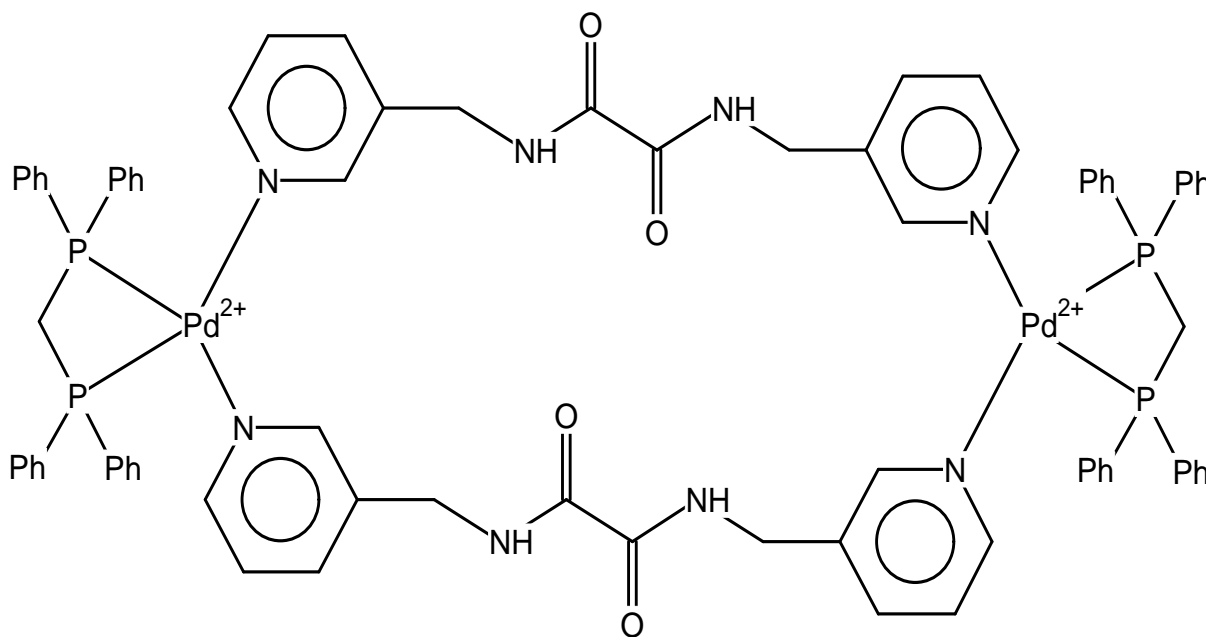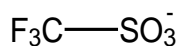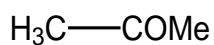

## Search Overview

**Search:** search8  
**Date/Time done:** Tue Jul 12 22:11:57 2011  
**Database(s):** CSD version 5.32 (November 2010)  
CSD version 5.32 updates (Nov 2010)  
**Restriction Info:** No refcode restrictions applied  
**Filters:** None  
**Percentage Completed:** 100%  
**Number of Hits:** 2

*Summary of queries used. Search found structures that:*

match

**Query 1**

**Query 2**

**Query 1**

4M

**Query 2**

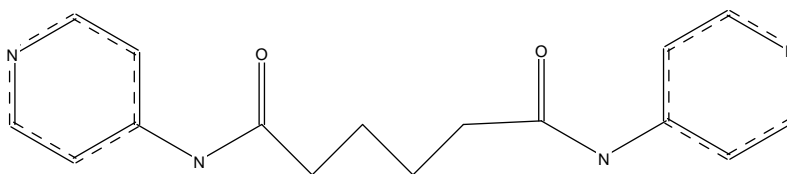

## Search: search8 (Tue Jul 12 22:11:57 2011): Hit 1

### KOBFEN

**Reference:** Yi-Fen Hsu, Chia-Her Lin, Jhy-Der Chen, Ju-Chun Wang  
(2008) *Cryst. Growth Des.*, **8**,1094

**Formula:**  $(C_{32} H_{40} Cu_2 N_8 O_{14} S_2)_n \cdot 2n(H_2 O)_1$

**Compound Name:** catena-(bis( $\mu_2$ -N,N'-bis(4-pyridyl)adipamide)-bis( $\mu_2$ -sulfato)-diaqua-dicopper(ii) dihydrate)

**Space Group:** Pna21      **Cell:**      **a** 18.698(1)      **b** 13.713(1)      **c** 16.305(2)  
**Space Group No.:** 33      (**Å, °**)       $\alpha$  90.00       $\beta$  90.00       $\gamma$  90.00

**R-Factor (%)**: 4.65      **Temperature(K)**: 295      **Density(g/cm<sup>3</sup>)**: 1.570

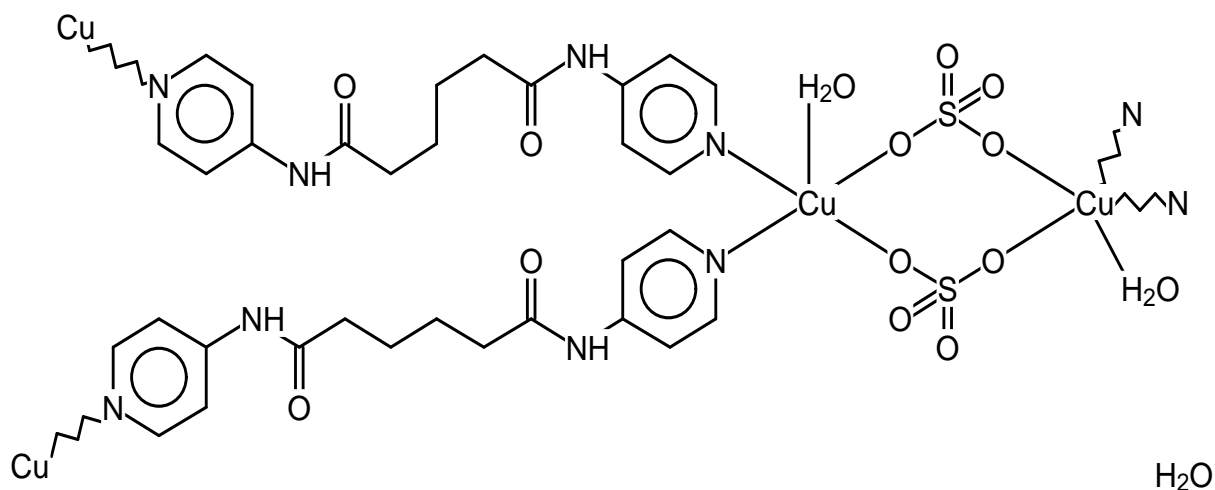

## Search: search8 (Tue Jul 12 22:11:57 2011): Hit 2

### XOPLEU

**Reference:** Yi-Fen Hsu, Hui-Ling Hu, Chia-Jun Wu, Chun-Wei Yeh, D.M.Proserpio, Jhy-Der Chen (2009) *CrystEngComm*, **11**,168

**Formula:**  $(C_{36} H_{48} Cd_1 N_8 O_6^{2+})_n, 2n(Cl_1 O_4^{1-})$

**Compound Name:** catena-(bis( $\mu_2$ -N,N'-bis(4-Pyridyl)adipoamide-N,N')-bis(ethanol)-cadmium(ii) diperchlorate)

**Space Group:** Pcca      **Cell:**      **a** 16.779(2)      **b** 12.126(1)      **c** 21.766(3)  
**Space Group No.:** 54      **(Å, °)**       $\alpha$  90.00       $\beta$  90.00       $\gamma$  90.00

**R-Factor (%):** 5.23      **Temperature(K):** 295      **Density(g/cm<sup>3</sup>):** 1.500

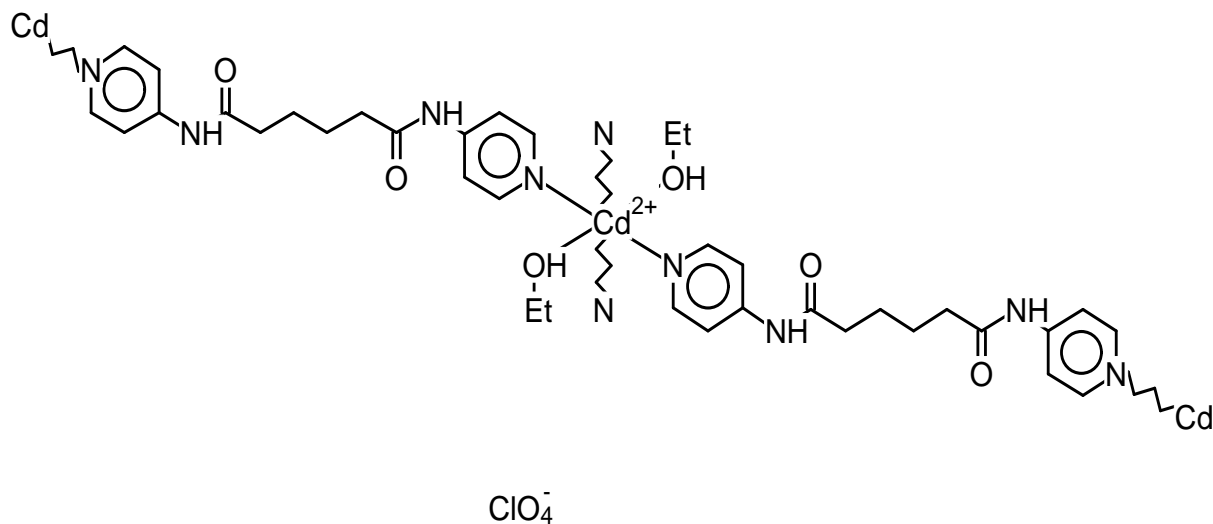

## Search Overview

**Search:** search2  
**Date/Time done:** Wed Jul 13 12:34:31 2011  
**Database(s):** CSD version 5.32 (November 2010)  
CSD version 5.32 updates (Nov 2010)  
**Restriction Info:** No refcode restrictions applied  
**Filters:** None  
**Percentage Completed:** 100%  
**Number of Hits:** 4

*Summary of queries used. Search found structures that:*

match

**Query 1**

**Query 2**

**Query 1**

4M

**Query 2**

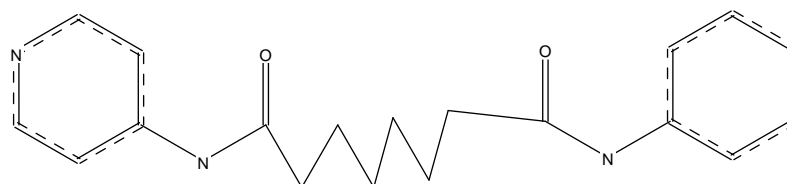

## Search: search2 (Wed Jul 13 12:34:31 2011): Hit 1

### VULFOY

**Reference:** L.Rajput, K.Biradha (2009) *Cryst.Growth Des.* ,9,3848

**Formula:**  $(C_{36} H_{48} Cu_1 N_8 O_6^{2+})_n, n(O_4 S_1^{2-}), 2n(C_2 H_6 O_1), 3n(H_2 O_1)$

**Compound Name:** catena-(bis( $\mu_2$ -N,N'-bis(4-Pyridyl)suberamide-N,N')-diaqua-copper(ii) sulfate ethanol solvate trihydrate)

**Space Group:** P212121    **Cell:**    **a** 14.262(3)    **b** 14.562(3)    **c** 23.545(5)  
**Space Group No.:** 19    **(Å, °)**     $\alpha$  90.00     $\beta$  90.00     $\gamma$  90.00

**R-Factor (%):** 5.04    **Temperature(K):** 293    **Density(g/cm<sup>3</sup>):** 1.351

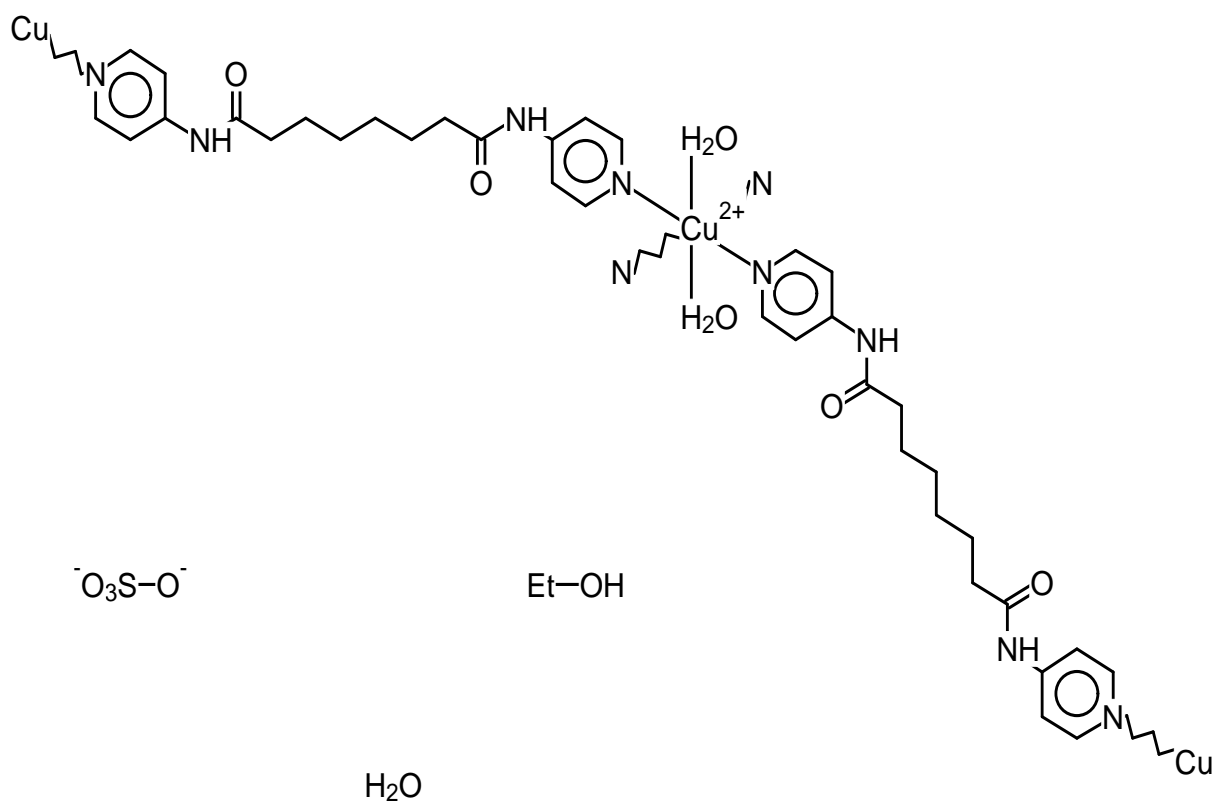

## Search: search2 (Wed Jul 13 12:34:31 2011): Hit 2

VULFUE

**Reference:** L.Rajput, K.Biradha (2009) *Cryst.Growth Des.* ,9,3848

**Formula:**  $(C_{36} H_{48} Cu_1 N_8 O_6^{2+})_n, n(F_6 Si_1^{2-}), 2n(C_2 H_6 O_1), 3n(H_2 O_1)$

**Compound Name:** catena-(bis( $\mu_2$ -N,N'-bis(4-Pyridyl)suberamide-N,N')-diaqua-copper(ii) hexafluorosilicate ethanol solvate trihydrate)

**Space Group:** P212121    **Cell:**    **a** 14.532(1)    **b** 14.557(1)    **c** 23.839(3)  
**Space Group No.:** 19    **(Å, °)**     $\alpha$  90.00     $\beta$  90.00     $\gamma$  90.00

**R-Factor (%):** 7.63    **Temperature(K):** 293    **Density(g/cm<sup>3</sup>):** 1.371

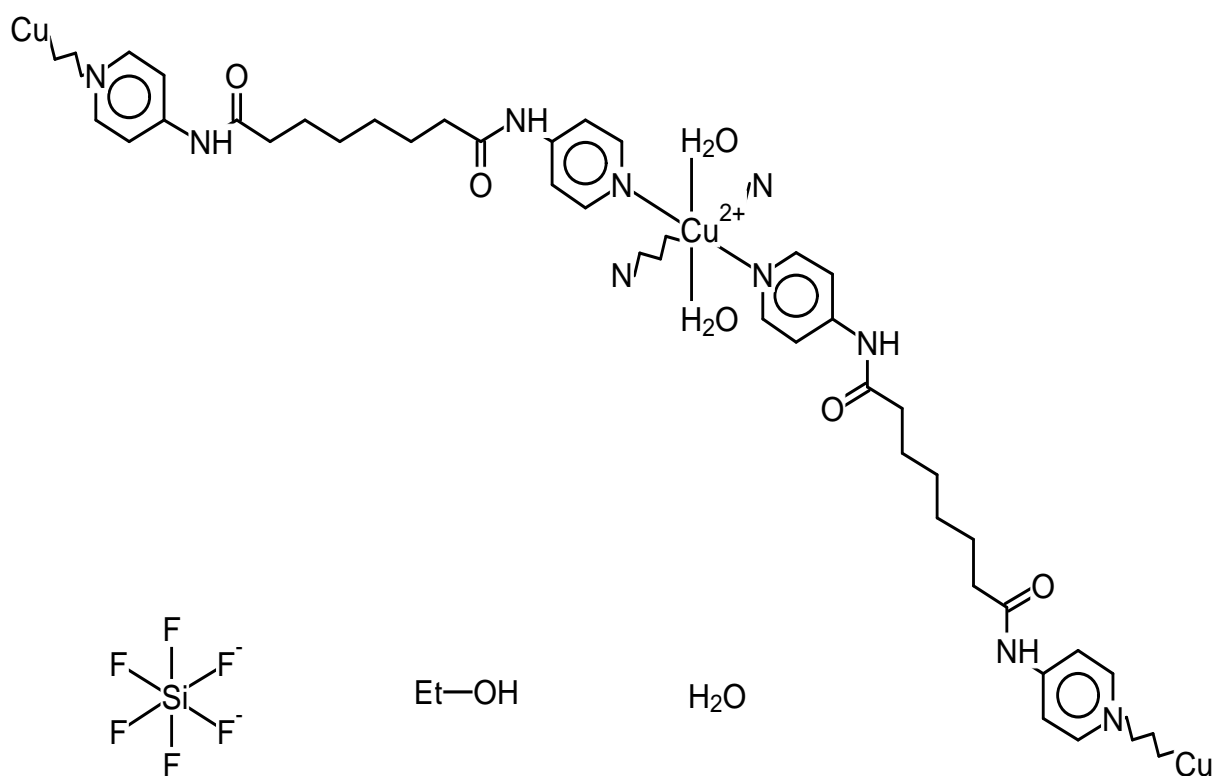



## Search: search2 (Wed Jul 13 12:34:31 2011): Hit 3

### VULGAL

**Reference:** L.Rajput, K.Biradha (2009) *Cryst.Growth Des.* ,9,3848

**Formula:**  $(C_{42} H_{58} Cu_1 N_{10} O_6^{2+})_n, 2n(N_1 O_3^{1-}), n(C_3 H_7 N_1 O_1), 2n(H_2 O_1)$

**Compound Name:** catena-(bis( $\mu_2$ -N,N'-bis(4-Pyridyl)suberamide-N,N')-bis(dimethylformamide)-copper(ii) dinitrate dimethylformamide solvate dihydrate)

**Space Group:** C2221      **Cell:**      **a** 15.132(0)      **b** 22.948(1)      **c** 15.477(0)  
**Space Group No.:** 20      **(Å, °)**       $\alpha$  90.00       $\beta$  90.00       $\gamma$  90.00

**R-Factor (%):** 8.18      **Temperature(K):** 293      **Density(g/cm<sup>3</sup>):** 1.354

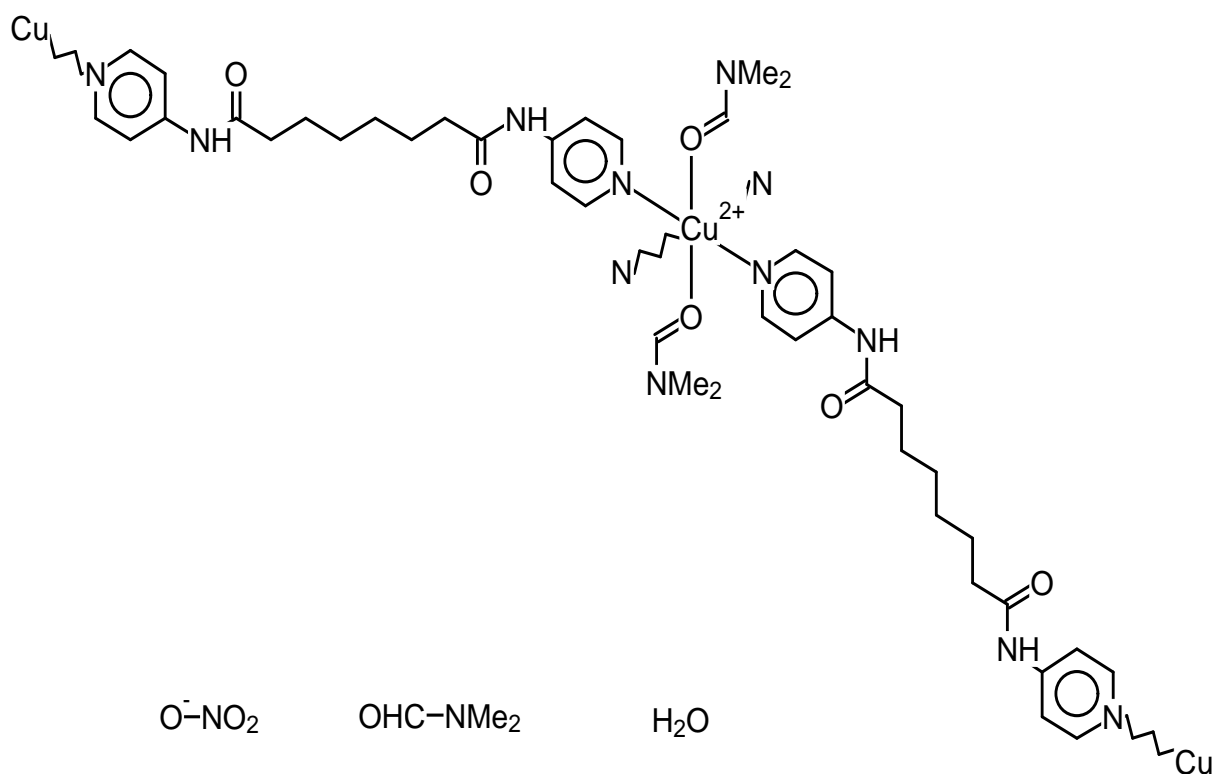

## Search: search2 (Wed Jul 13 12:34:31 2011): Hit 4

XUMNAV

**Reference:** L.Rajput, K.Biradha (2009) *Cryst.Growth Des.* ,9,3848

**Formula:**  $(C_{36} H_{48} Cu_1 N_8 O_6^{2+})_n, 2n(F_6 P_1^{1-})$

**Compound Name:** catena-(bis( $\mu_2$ -N,N'-bis(4-Pyridyl)suberamide-N,N')-diaqua-copper(ii) bis(hexafluorophosphate))

**Space Group:** P212121    **Cell:**    **a** 14.594(4)    **b** 14.633(4)    **c** 23.285(7)  
**Space Group No.:** 19    **(Å, °)**     $\alpha$  90.00     $\beta$  90.00     $\gamma$  90.00

**R-Factor (%):** 0.00    **Temperature(K):** 295    **Density(g/cm<sup>3</sup>):** 1.392

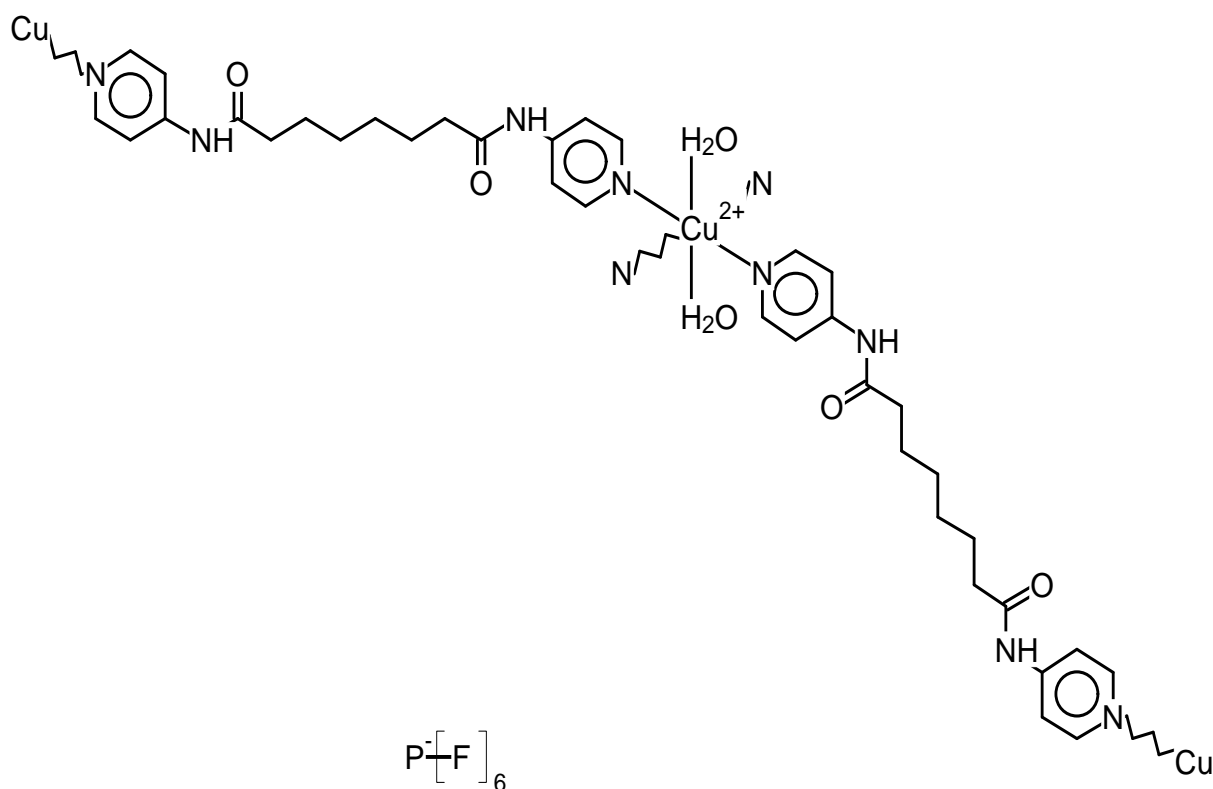

## Search Overview

**Search:** search9  
**Date/Time done:** Tue Jul 12 22:14:07 2011  
**Database(s):** CSD version 5.32 (November 2010)  
CSD version 5.32 updates (Nov 2010)  
**Restriction Info:** No refcode restrictions applied  
**Filters:** None  
**Percentage Completed:** 100%  
**Number of Hits:** 1

*Summary of queries used. Search found structures that:*

match

**Query 1**

**Query 2**

**Query 1**

4M

**Query 2**

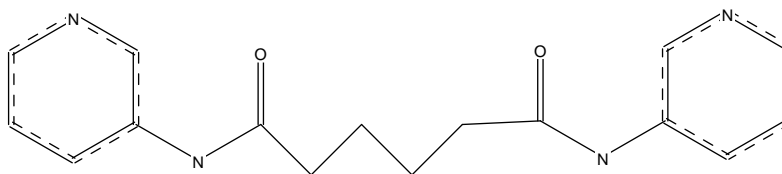

## Search: search9 (Tue Jul 12 22:14:07 2011): Hit 1

### XOPLAQ

**Reference:** Yi-Fen Hsu, Hui-Ling Hu, Chia-Jun Wu, Chun-Wei Yeh, D.M.Proserpio, Jhy-Der Chen (2009) *CrystEngComm*, **11**,168

**Formula:**  $(C_{34} H_{44} Cd_1 N_8 O_6^{2+})_n, 2n(Cl_1 O_4^{1-}), 2n(C_1 H_4 O_1)$

**Compound Name:** catena-(bis( $\mu_2$ -N,N'-bis(3-Pyridyl)adipoamide-N,N')-bis(methanol)-cadmium(ii) diperchlorate methanol solvate)

**Space Group:** P-1      **Cell:**      **a** 9.676(1)      **b** 9.974(1)      **c** 12.434(1)  
**Space Group No.:** 2      (**Å, °**)       $\alpha$  76.55(0)       $\beta$  78.66(0)       $\gamma$  79.37(0)

**R-Factor (%):** 6.17      **Temperature(K):** 295      **Density(g/cm<sup>3</sup>):** 1.520

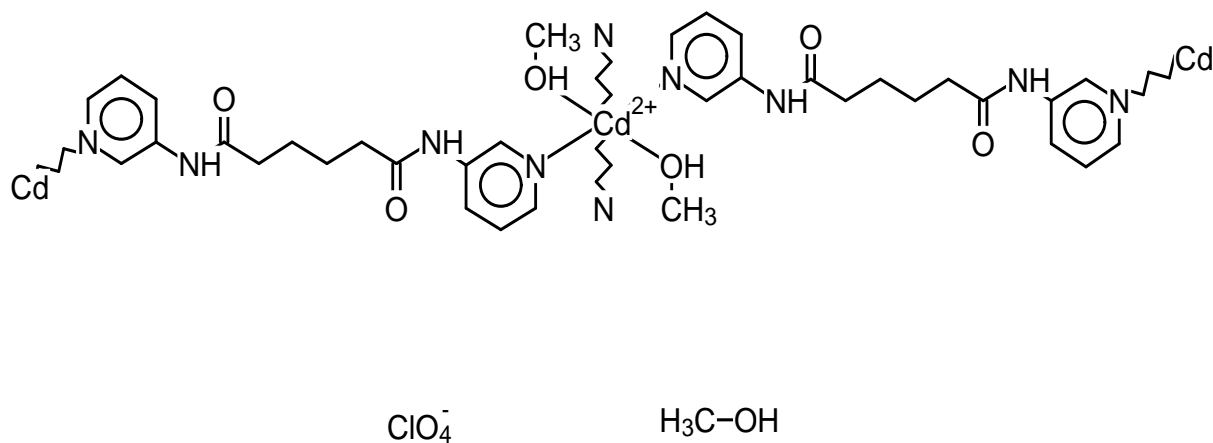

## Search Overview

**Search:** search2  
**Date/Time done:** Wed Jul 13 12:40:51 2011  
**Database(s):** CSD version 5.32 (November 2010)  
CSD version 5.32 updates (Nov 2010)  
**Restriction Info:** No refcode restrictions applied  
**Filters:** None  
**Percentage Completed:** 100%  
**Number of Hits:** 4

*Summary of queries used. Search found structures that:*

match

**Query 1**

**Query 2**

**Query 1**

4M

**Query 2**

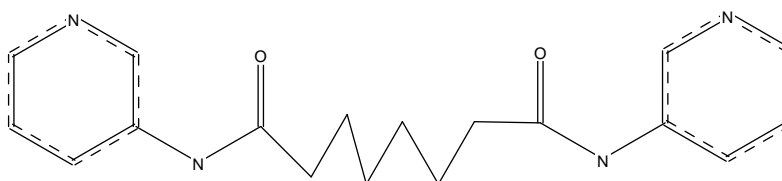

## Search: search2 (Wed Jul 13 12:40:51 2011): Hit 1

### UHXEP

**Reference:** L.Rajput, K.Biradha (2009) *CrystEngComm* ,11,1220

**Formula:**  $(C_{38} H_{44} Cu_1 N_{10} O_4 S_2)_n \cdot 2n(C_6 H_4 I_2)$

**Compound Name:** catena-(bis( $\mu_2$ -N,N'-bis(Pyridin-3-yl)octanediamide-N,N')-bis(isothiocyanato)-copper(ii) bis(1,4-di-iodobenzene) clathrate)

**Space Group:** P-1      **Cell:**      **a** 9.008(4)      **b** 10.139(5)      **c** 16.671(8)

**Space Group No.:** 2      **(Å, °)**       $\alpha$  92.82(1)       $\beta$  104.17(1)       $\gamma$  109.24(1)

**R-Factor (%):** 5.31      **Temperature(K):** 293      **Density(g/cm<sup>3</sup>):** 1.796

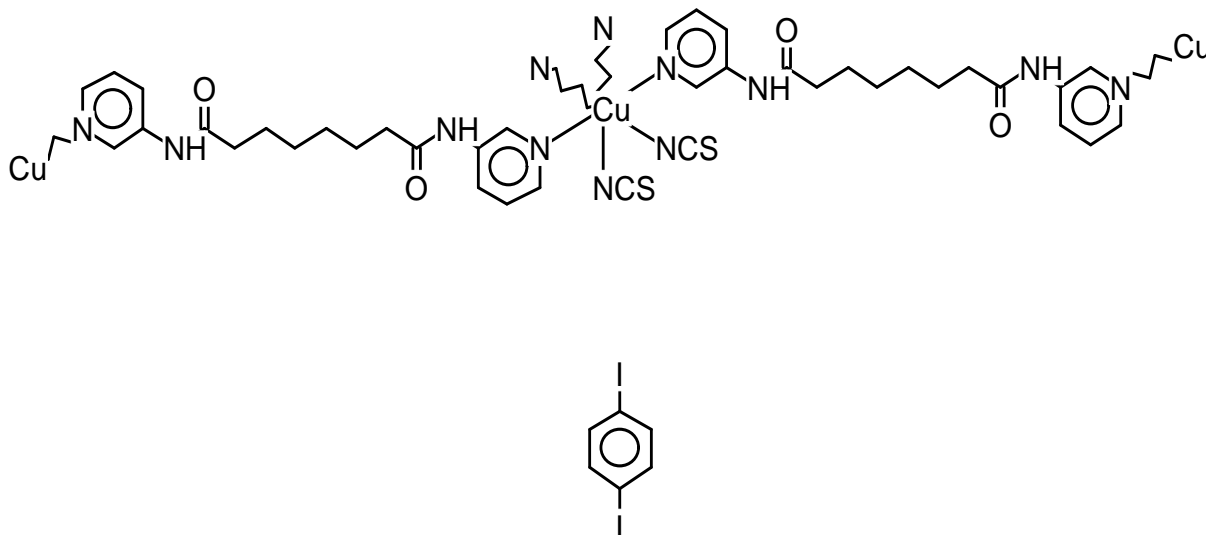

## Search: search2 (Wed Jul 13 12:40:51 2011): Hit 2

UHIXIT

**Reference:** L.Rajput, K.Biradha (2009) *CrystEngComm* ,11,1220

**Formula:**  $(C_{38} H_{44} Cu_1 N_{10} O_4 S_2)_n \cdot 2n(C_6 H_4 Br_2)$

**Compound Name:** catena-(bis( $\mu_2$ -N,N'-bis(Pyridin-3-yl)octanediamide-N,N')-bis(isothiocyanato)-copper(ii) bis(1,4-dibromobenzene) clathrate)

**Space Group:** P-1      **Cell:**      **a** 9.106(1)      **b** 10.028(1)      **c** 16.012(2)

**Space Group No.:** 2      **(Å, °)**       $\alpha$  94.20(0)       $\beta$  102.98(0)       $\gamma$  108.09(0)

**R-Factor (%):** 6.54      **Temperature(K):** 293      **Density(g/cm<sup>3</sup>):** 1.619

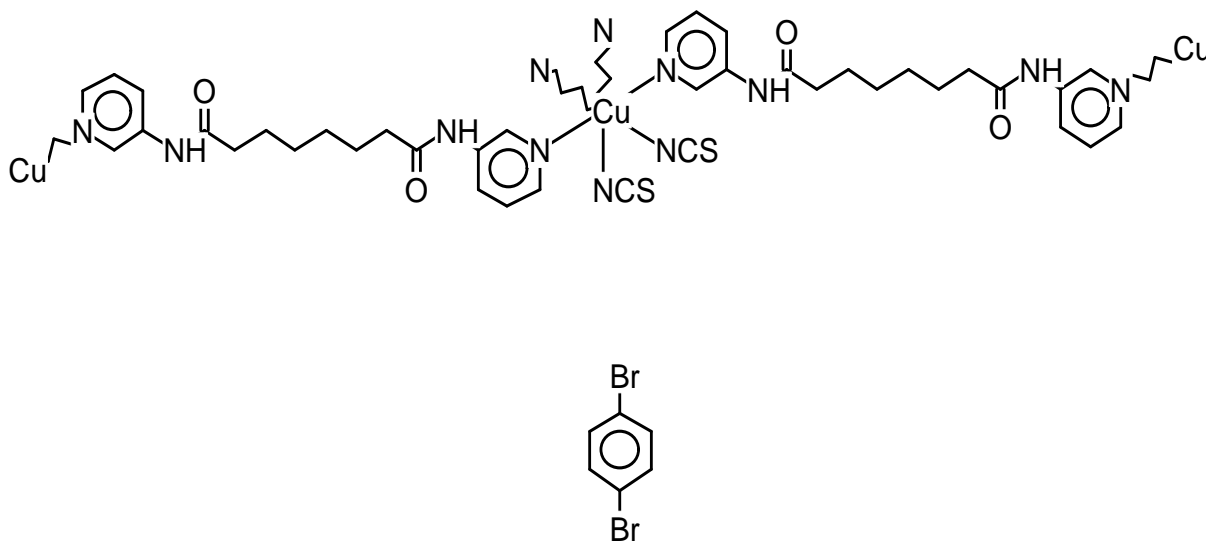

## Search: search2 (Wed Jul 13 12:40:51 2011): Hit 3

UHIXOZ

**Reference:** L.Rajput, K.Biradha (2009) *CrystEngComm* ,11,1220

**Formula:**  $(C_{38} H_{44} Cu_1 N_{10} O_4 S_2)_n, 2n(C_{16} H_{10})$

**Compound Name:** catena-(bis( $\mu_2$ -N,N'-bis(Pyridin-3-yl)octanediamide-N,N')-bis(isothiocyanato)-copper(ii) bis(pyrene) clathrate)

**Space Group:** P21/n      **Cell:**      **a** 10.144(0)      **b** 14.972(0)      **c** 20.351(0)

**Space Group No.:** 14      **(Å, °)**       $\alpha$  90.00       $\beta$  101.11(0)       $\gamma$  90.00

**R-Factor (%):** 4.48      **Temperature(K):** 293      **Density(g/cm<sup>3</sup>):** 1.355

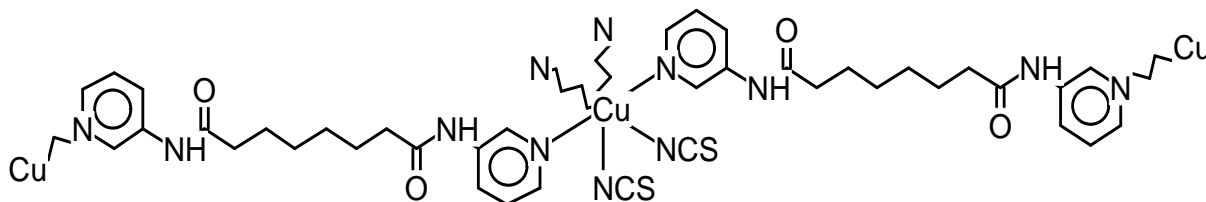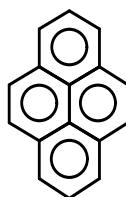



## Search: search2 (Wed Jul 13 12:40:51 2011): Hit 4

UHIXUF

**Reference:** L.Rajput, K.Biradha (2009) *CrystEngComm* ,11,1220

**Formula:** (C<sub>38</sub> H<sub>44</sub> Cu<sub>1</sub> N<sub>10</sub> O<sub>4</sub> S<sub>2</sub>)<sub>n</sub>,2n(C<sub>14</sub> H<sub>10</sub>)

**Compound Name:** catena-(bis(μ<sub>2</sub>-N,N'-bis(Pyridin-3-yl)octanediamide-N,N')-bis(isothiocyanato)-copper(ii) bis(phenanthrene) clathrate)

**Space Group:** P21/n      **Cell:**      **a** 9.987(1)      **b** 14.840(2)      **c** 20.416(3)

**Space Group No.:** 14      **(Å, °)**      **α** 90.00      **β** 100.36(0)      **γ** 90.00

**R-Factor (%):** 4.27      **Temperature(K):** 293      **Density(g/cm<sup>3</sup>):** 1.327

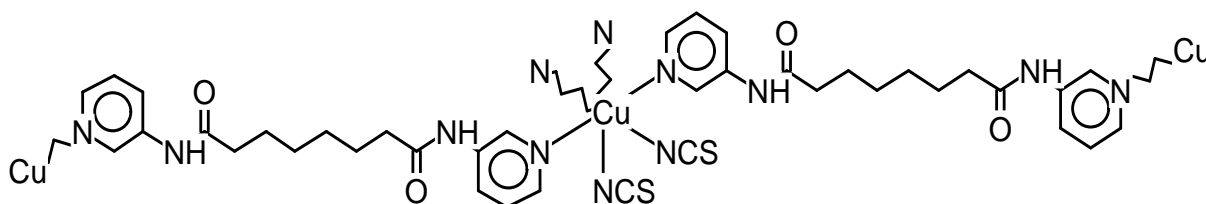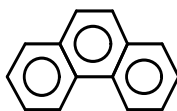

Supplement: c2cs15251g_2.pdf [file c2cs15251g_2.pdf]
