# Supplementary material for: Coordination polymers: what has been achieved in going from innocent 4,4′-bipyridine to bis-pyridyl ligands having a non-innocent backbone?
Source: Royal Society of Chemistry journal article supplement (doi:10.1039/c2cs15251g), 2012-01-01
Supplement: c2cs15251g_4.pdf [file c2cs15251g_4.pdf]

## Search Overview

**Search:** search1  
**Date/Time done:** Thu Jul 14 03:39:50 2011  
**Database(s):** CSD version 5.32 (November 2010)  
CSD version 5.32 updates (Nov 2010)  
**Restriction Info:** No refcode restrictions applied  
**Filters:** None  
**Percentage Completed:** 100%  
**Number of Hits:** 13

*Summary of queries used. Search found structures that:*

match

**Query 2**

**Query 1**

**Query 1**

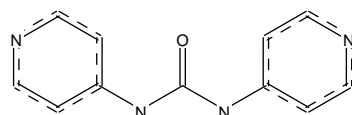

**Query 2**

4M

## Search: search1 (Thu Jul 14 03:39:50 2011): Hit 1

EKEJAF

**Reference:** M.Barboiu, A.van der Lee (2003)  
*Acta Crystallogr., Sect. C: Cryst. Struct. Commun.* ,59,m366

**Formula:** C<sub>6</sub> H<sub>16</sub> Ca<sub>1</sub> F<sub>6</sub> O<sub>10</sub> S<sub>2</sub>, 2(C<sub>11</sub> H<sub>10</sub> N<sub>4</sub> O<sub>1</sub>)

**Compound Name:** tetrakis(Methanol)-bis(trifluoromethanesulfonato)-calcium bis(1,3-di-4-pyridylurea)

**Space Group:** P-1      **Cell:**    **a** 9.157(1)    **b** 9.768(1)    **c** 11.366(2)  
**Space Group No.:** 2      **(Å, °)**    **α** 98.95(1)    **β** 97.14(1)    **γ** 94.03(1)

**R-Factor (%):** 3.50      **Temperature(K):** 173      **Density(g/cm<sup>3</sup>):** 1.497

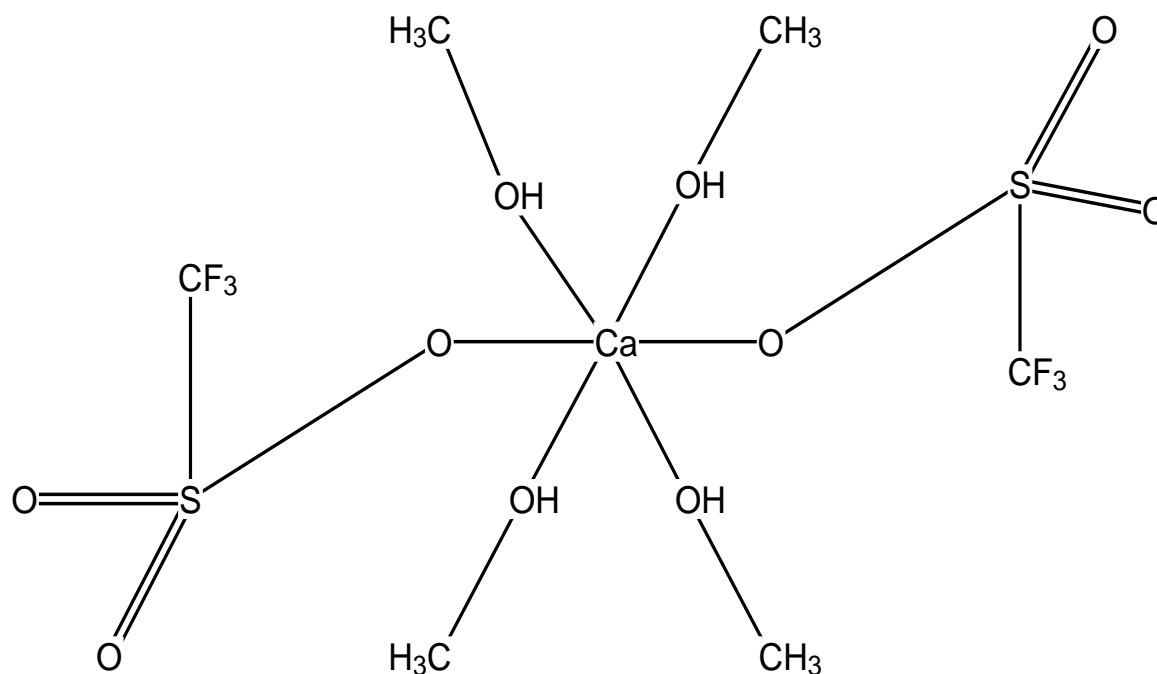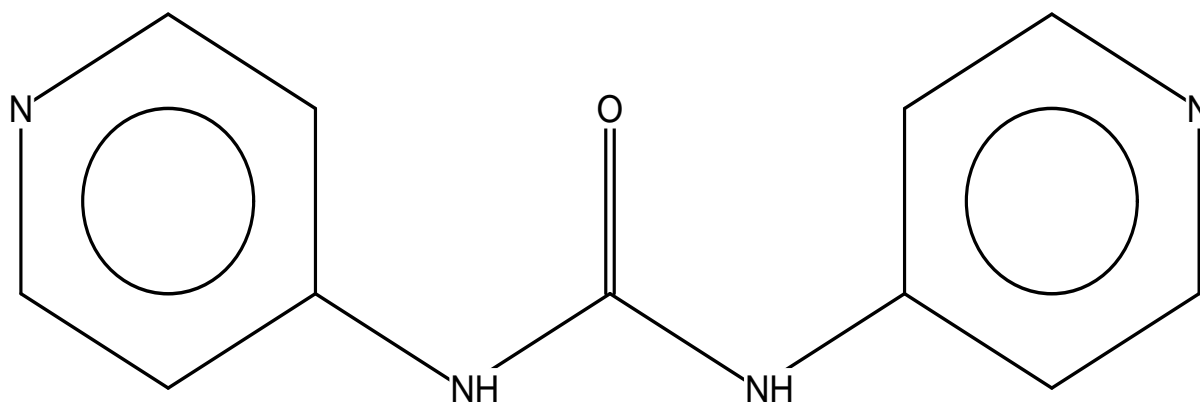

## Search: search1 (Thu Jul 14 03:39:50 2011): Hit 2

KAZVAJ

**Reference:** D.K.Kumar, A.Das, P.Dastidar (2006) *Cryst.Growth Des.* ,  
6,216

**Formula:** C<sub>11</sub> H<sub>12</sub> N<sub>4</sub> O<sub>1</sub><sup>2+</sup>, Cl<sub>4</sub> Pt<sub>1</sub><sup>2-</sup>

**Compound Name:** N,N'-bis(4-Pyridinio)urea tetrachloro-platinum(ii)

**Space Group:** P21/c      **Cell:**      **a** 14.898(1)      **b** 7.025(0)      **c** 15.941(1)  
**Space Group No.:** 14      **(Å, °)**      **α** 90.00      **β** 110.90(0)      **γ** 90.00

**R-Factor (%):** 1.55      **Temperature(K):** 100      **Density(g/cm<sup>3</sup>):** 2.357

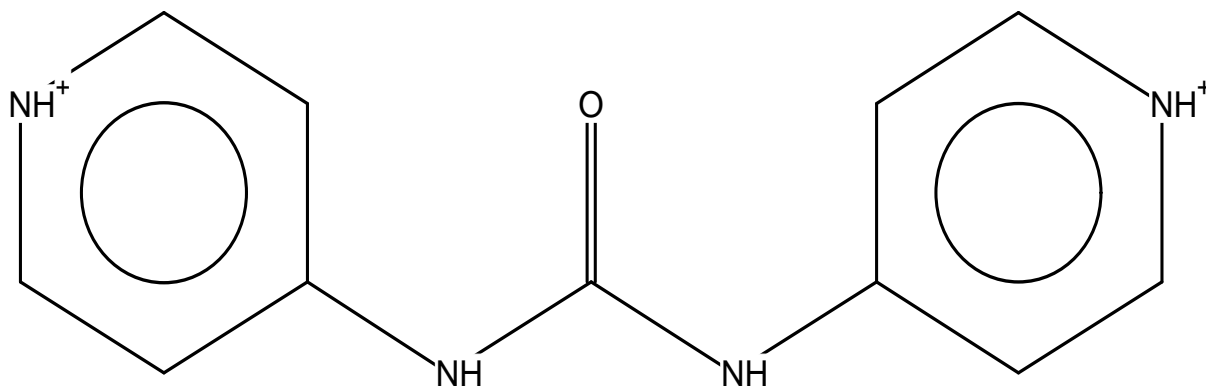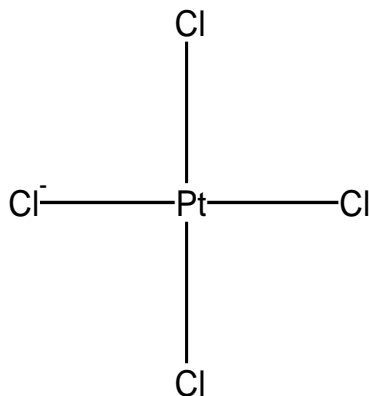

## Search: search1 (Thu Jul 14 03:39:50 2011): Hit 3

### KAZVEN

**Reference:** D.K.Kumar, A.Das, P.Dastidar (2006) *Cryst.Growth Des.* ,  
6,216

**Formula:** C<sub>11</sub> H<sub>12</sub> N<sub>4</sub> O<sub>1</sub><sup>2+</sup>, Cl<sub>4</sub> Pd<sub>1</sub><sup>2-</sup>

**Compound Name:** N-(4-Pyridinio)isonicotinamidinium tetrachloro-palladium(ii)

**Space Group:** P21/c      **Cell:**    **a** 17.171(2)    **b** 7.863(1)    **c** 12.362(1)  
**Space Group No.:** 14      **(Å, °)**    **α** 90.00      **β** 109.44(0)    **γ** 90.00

**R-Factor (%):** 1.99      **Temperature(K):** 100      **Density(g/cm<sup>3</sup>):** 1.960

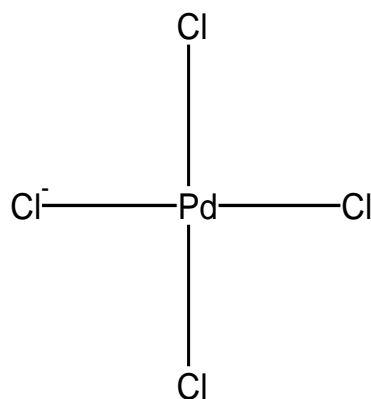

## Search: search1 (Thu Jul 14 03:39:50 2011): Hit 4

### LISDEX

**Reference:** D.K.Kumar, A.Das, P.Dastidar (2007) *Cryst.Growth Des.* ,  
7,2096

**Formula:** (C<sub>22</sub> H<sub>22</sub> Cd<sub>1</sub> N<sub>9</sub> O<sub>6</sub><sup>1+</sup>)<sub>n</sub>,n(N<sub>1</sub> O<sub>3</sub><sup>1-</sup>),n(C<sub>2</sub> H<sub>6</sub> O<sub>1</sub>),n(C<sub>6</sub> H<sub>5</sub> N<sub>1</sub> O<sub>2</sub>)

**Compound Name:** catena-(bis(μ<sub>2</sub>-N,N'-bis(4-Pyridyl)urea-N'',N''')-aqua-(nitrate-O)-cadmium nitrate ethanol nitrobenzene solvate)

**Space Group:** Fdd2      **Cell:**      **a** 21.109(1)      **b** 34.334(2)      **c** 20.156(1)  
**Space Group No.:** 43      **(Å, °)**      **α** 90.00      **β** 90.00      **γ** 90.00

**R-Factor (%):** 2.94      **Temperature(K):** 100      **Density(g/cm<sup>3</sup>):** 1.550

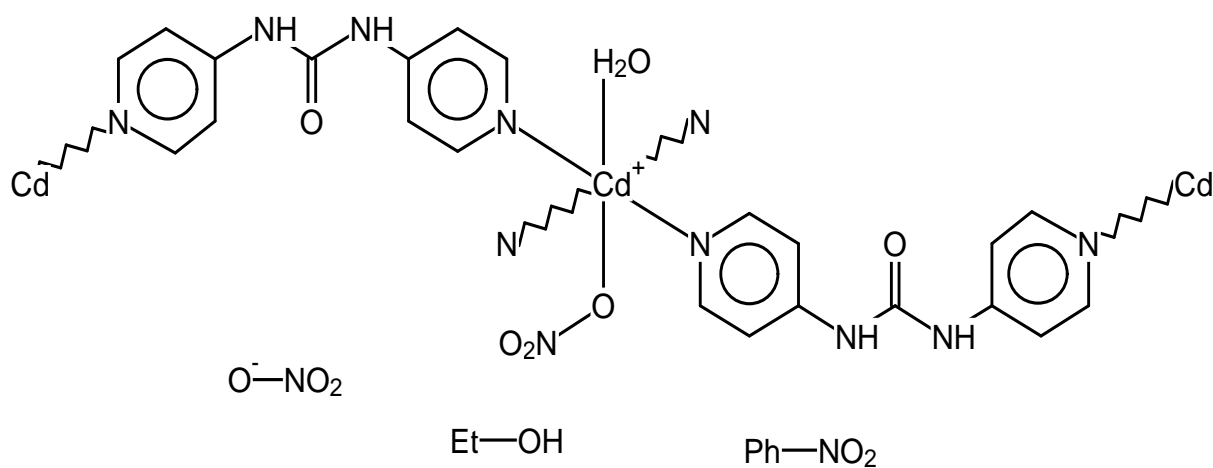

## Search: search1 (Thu Jul 14 03:39:50 2011): Hit 5

LISDIB

**Reference:** D.K.Kumar, A.Das, P.Dastidar (2007) *Cryst.Growth Des.* ,  
7,2096

**Formula:** C<sub>22</sub> H<sub>24</sub> Cd<sub>1</sub> N<sub>10</sub> O<sub>10</sub>

**Compound Name:** bis(N,N'-bis(4-Pyridyl)urea-N'')-diaqua-bis(nitrato-O)-cadmium

**Space Group:** P-1      **Cell:**    **a** 6.182(1)    **b** 10.254(3)    **c** 10.921(3)  
**Space Group No.:** 2      **(Å, °)**    **α** 87.02(0)    **β** 79.04(0)    **γ** 77.89(0)

**R-Factor (%):** 3.93      **Temperature(K):** 298      **Density(g/cm<sup>3</sup>):** 1.751

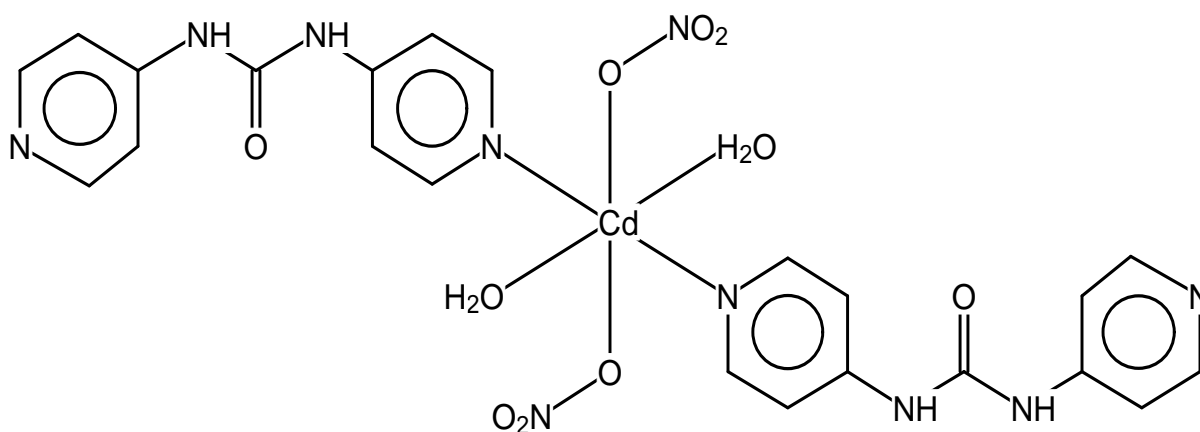

## Search: search1 (Thu Jul 14 03:39:50 2011): Hit 6

NAVWEN

**Reference:** D.K.Kumar, D.A.Jose, A.Das, P.Dastidar (2005)  
*Inorg.Chem.* ,**44**,6933

**Formula:**  $(C_{44} H_{40} N_{16} O_4 Zn_2^{4+})n, 4n(Cl_1 O_4^{1-})$

**Compound Name:** catena-(tetrakis( $\mu_2$ -N,N'-bis(4-Pyridyl)urea)-di-zinc(ii) tetraperchlorate)

**Space Group:** I-4      **Cell:**    **a** 17.880(5)    **b** 17.880(5)    **c** 8.254(4)  
**Space Group No.:** 82      **(Å, °)**     $\alpha$  90.00       $\beta$  90.00       $\gamma$  90.00

**R-Factor (%):** 4.43      **Temperature(K):** 100      **Density(g/cm<sup>3</sup>):** 1.744

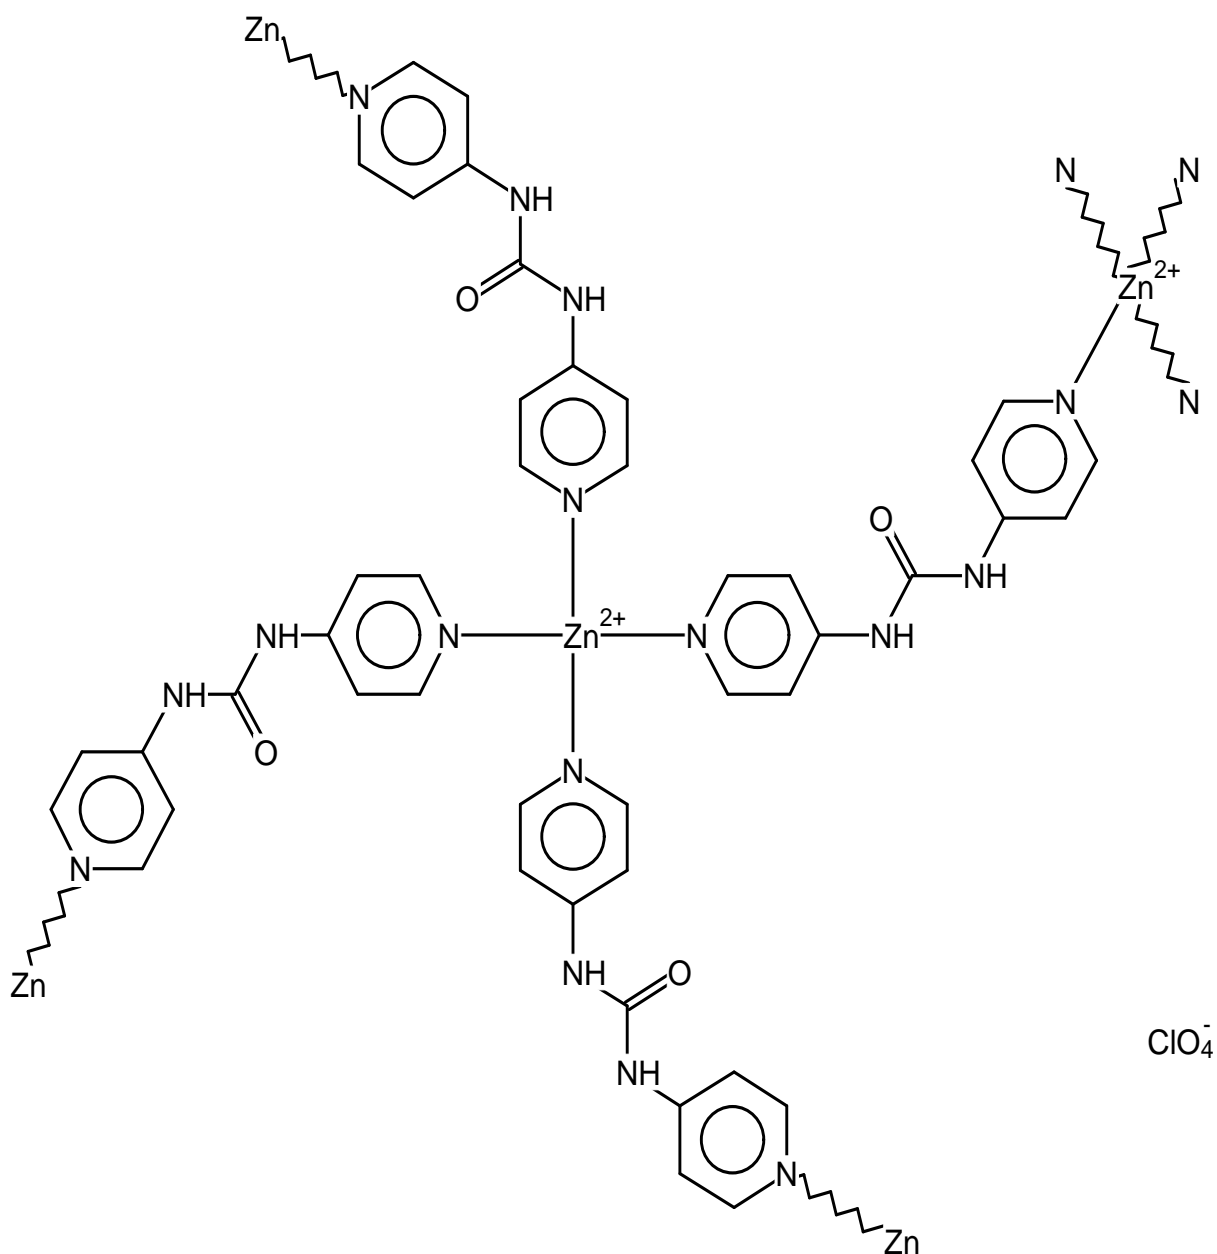

## Search: search1 (Thu Jul 14 03:39:50 2011): Hit 7

### PAQLID

**Reference:** D.K.Kumar, A.Ballabh, D.A.Jose, P.Dastidar, A.Das  
(2005) *Cryst.Growth Des.* ,5,651

**Formula:**  $2(\text{C}_{11}\text{H}_{12}\text{N}_4\text{O}_1^{2+}), \text{Cl}_8\text{Cu}_2^{4-}$

**Compound Name:** bis(N,N'-bis(4-Pyridinio)urea) tetrachloro-copper

**Space Group:** P21/c      **Cell:**    **a** 7.734(5)    **b** 17.448(5)    **c** 11.609(3)  
**Space Group No.:** 14      **(Å, °)**     $\alpha$  90.00       $\beta$  98.54(3)     $\gamma$  90.00

**R-Factor (%):** 3.61      **Temperature(K):** 293      **Density(g/cm<sup>3</sup>):** 1.808

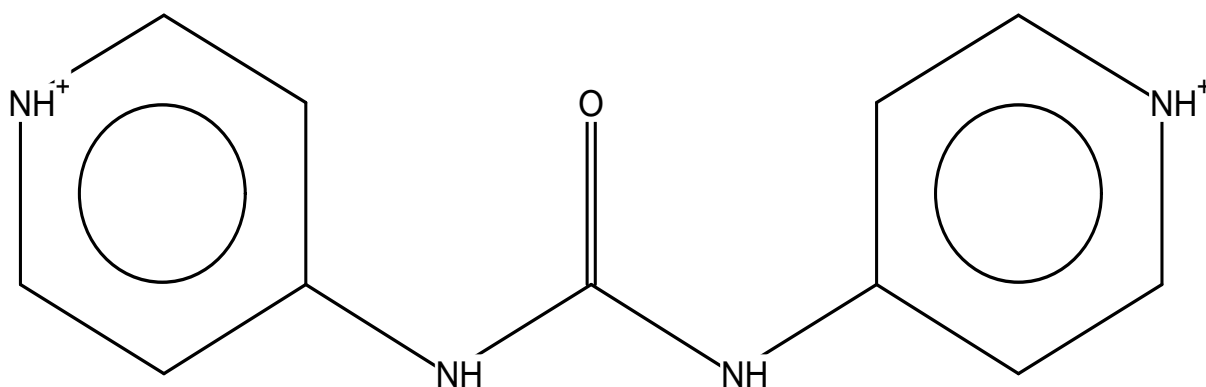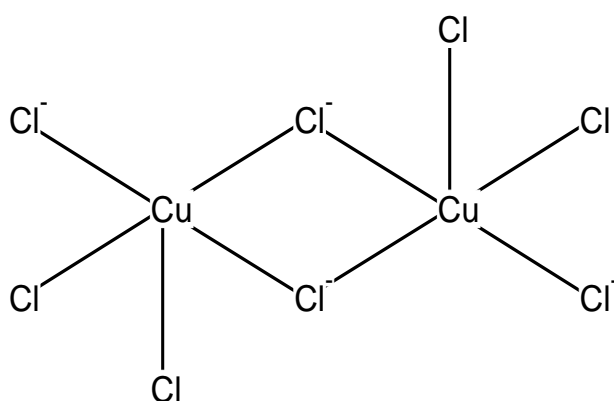



## Search: search1 (Thu Jul 14 03:39:50 2011): Hit 8

### SEQGEB

**Reference:** D.K.Kumar, A.Das, P.Dastidar (2006) *CrystEngComm*, **8**, 805

**Formula:**  $(C_{11} H_{10} Cl_2 N_4 O_1 Zn_1)_n, n(C_2 H_6 O_2), n(C_1 H_4 O_1)$

**Compound Name:** catena-(( $\mu_2$ -N,N'-bis(4-Pyridyl)urea)-dichloro-zinc(ii) ethylene glycol methanol solvate)

**Space Group:** Pbcn      **Cell:**      **a** 19.193(1)      **b** 7.198(0)      **c** 24.428(1)  
**Space Group No.:** 60      **(Å, °)**       $\alpha$  90.00       $\beta$  90.00       $\gamma$  90.00

**R-Factor (%):** 4.77      **Temperature(K):** 100      **Density(g/cm<sup>3</sup>):** 1.750

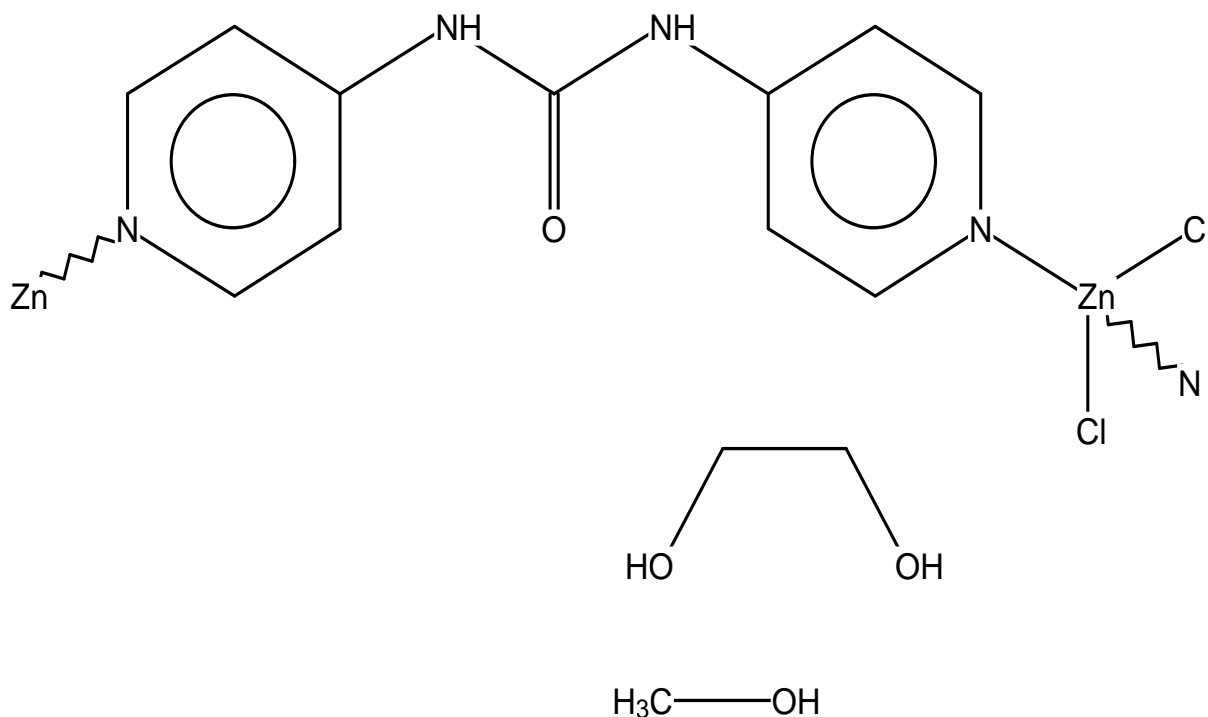

## Search: search1 (Thu Jul 14 03:39:50 2011): Hit 9

### SEQGIF

**Reference:** D.K.Kumar, A.Das, P.Dastidar (2006) *CrystEngComm*, **8**, 805

**Formula:** (C<sub>11</sub> H<sub>10</sub> Cl<sub>2</sub> N<sub>4</sub> O<sub>1</sub> Zn<sub>1</sub>)<sub>n</sub>, 2n(H<sub>2</sub> O<sub>1</sub>)

**Compound Name:** catena-((μ<sub>2</sub>-N,N'-bis(4-Pyridyl)urea)-dichloro-zinc(ii) dihydrate)

**Space Group:** Pbcn      **Cell:**      **a** 18.346(1)      **b** 6.841(0)      **c** 24.146(2)  
**Space Group No.:** 60      **(Å, °)**      α 90.00      β 90.00      γ 90.00

**R-Factor (%):** 4.48      **Temperature(K):** 100      **Density(g/cm<sup>3</sup>):** 1.695

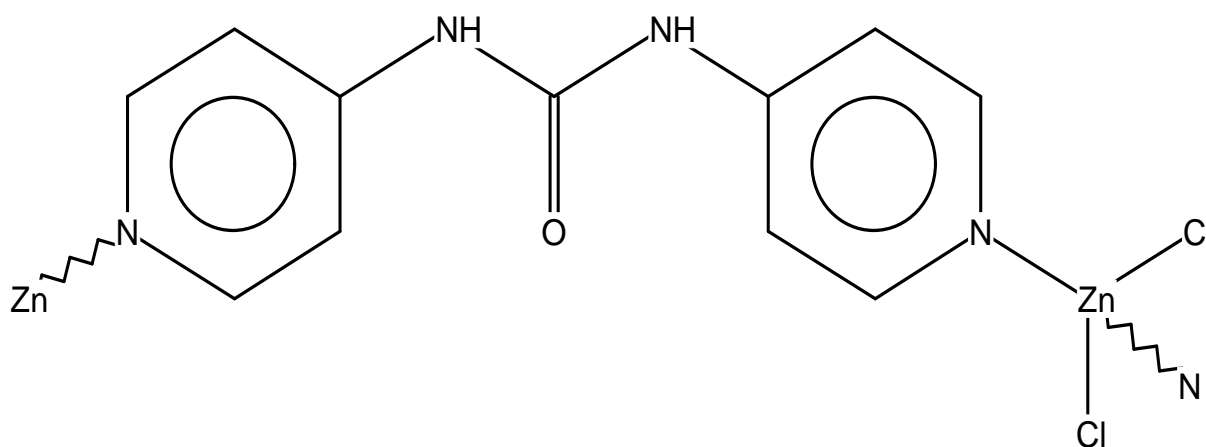

## Search: search1 (Thu Jul 14 03:39:50 2011): Hit 10

### SEQGOL

**Reference:** D.K.Kumar, A.Das, P.Dastidar (2006) *CrystEngComm*, **8**, 805

**Formula:** (C<sub>15</sub> H<sub>16</sub> N<sub>4</sub> O<sub>5</sub> Zn<sub>1</sub>)<sub>n</sub>,n(H<sub>2</sub> O<sub>1</sub>)

**Compound Name:** catena-((μ<sub>2</sub>-N,N'-bis(4-Pyridyl)urea)-diacetato-zinc(ii) monohydrate)

**Space Group:** C2/c      **Cell:**    **a** 10.758(0)    **b** 16.552(1)    **c** 19.285(1)

**Space Group No.:** 15      **(Å, °)**    **α** 90.00      **β** 96.31(0)    **γ** 90.00

**R-Factor (%):** 2.83      **Temperature(K):** 100      **Density(g/cm<sup>3</sup>):** 1.618

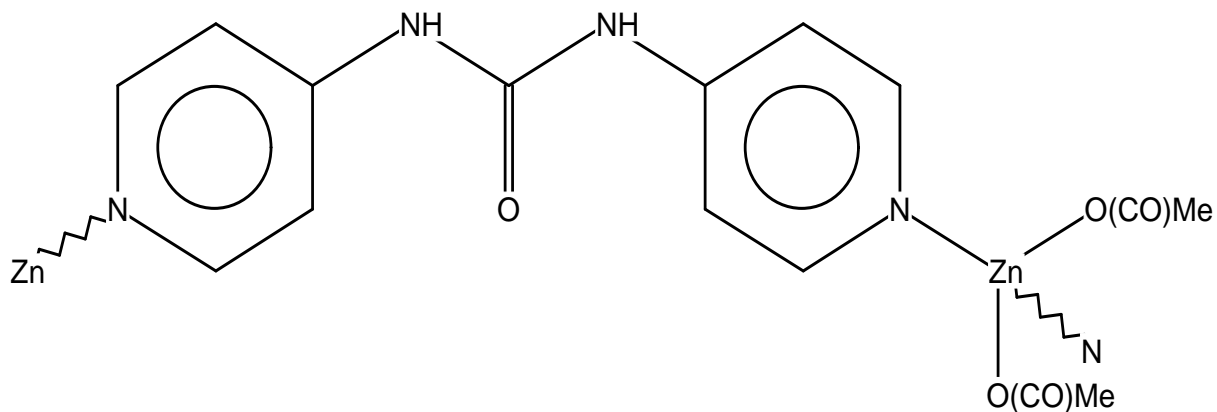

H<sub>2</sub>O

## Search: search1 (Thu Jul 14 03:39:50 2011): Hit 11

### SEQGUR

**Reference:** D.K.Kumar, A.Das, P.Dastidar (2006) *CrystEngComm* ,**8**, 805

**Formula:** (C<sub>11</sub> H<sub>10</sub> N<sub>4</sub> O<sub>5</sub> S<sub>1</sub> Zn<sub>1</sub>)<sub>n</sub>,2n(C<sub>2</sub> H<sub>6</sub> O<sub>2</sub>)

**Compound Name:** catena-((μ<sub>2</sub>-N,N'-bis(4-Pyridyl)urea)-(μ<sub>2</sub>-sulfato)-zinc(ii) ethylene glycol solvate)

**Space Group:** P21/c      **Cell:**      **a** 4.853(0)      **b** 16.207(1)      **c** 24.048(2)  
**Space Group No.:** 14      **(Å, °)**      **α** 90.00      **β** 100.39(0)      **γ** 90.00

**R-Factor (%):** 4.09      **Temperature(K):** 100      **Density(g/cm<sup>3</sup>):** 1.785

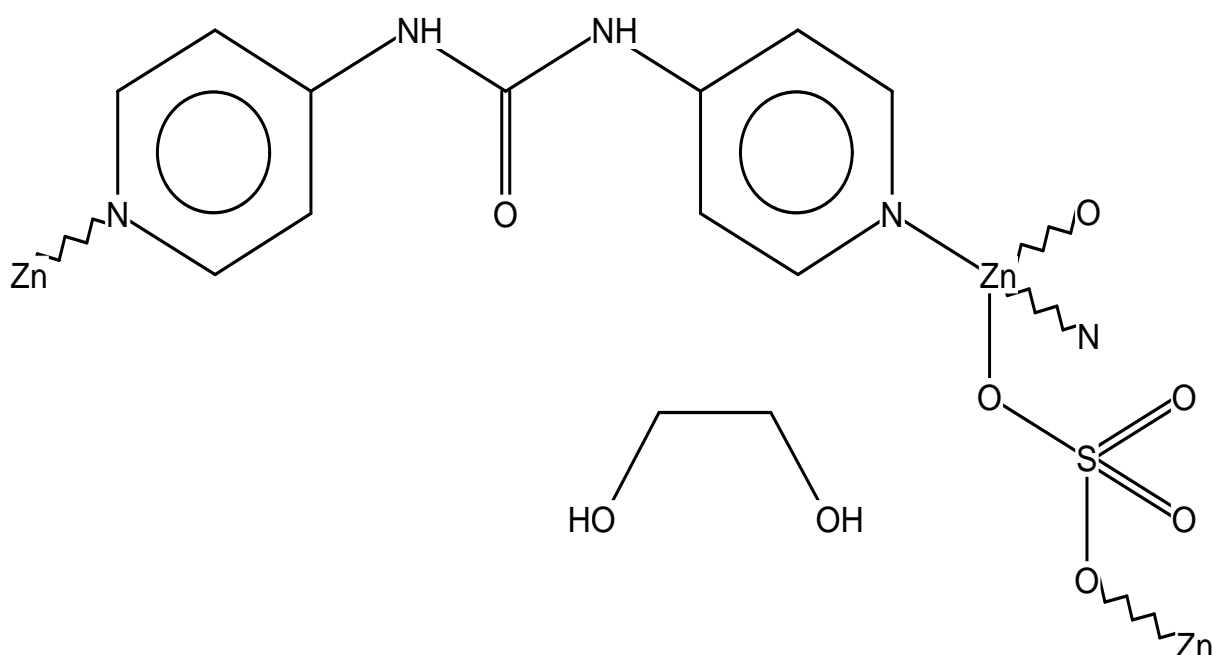

## Search: search1 (Thu Jul 14 03:39:50 2011): Hit 12

### VIMZAT

**Reference:** D.K.Kumar, A.Das, P.Dastidar (2007) *Inorg.Chem.* ,**46**, 7351

**Formula:** C<sub>55</sub> H<sub>38</sub> N<sub>8</sub> O<sub>1</sub> Zn<sub>1</sub>.0.33(C<sub>1</sub> H<sub>1</sub> Cl<sub>3</sub>),1.44(C<sub>7</sub> H<sub>8</sub>)

**Compound Name:** (N,N'-bis(4-Pyridyl)urea)-(5,10,15,20-tetraphenylporphyrinato)-zinc(ii) toluene chloroform clathrate toluene solvate

**Space Group:** R-3      **Cell:**    **a** 39.647(1)    **b** 39.647(1)    **c** 17.055(1)  
**Space Group No.:** 148      **(Å, °)**     $\alpha$  90.00       $\beta$  90.00       $\gamma$  120.00

**R-Factor (%):** 6.92      **Temperature(K):** 100      **Density(g/cm<sup>3</sup>):** 1.370

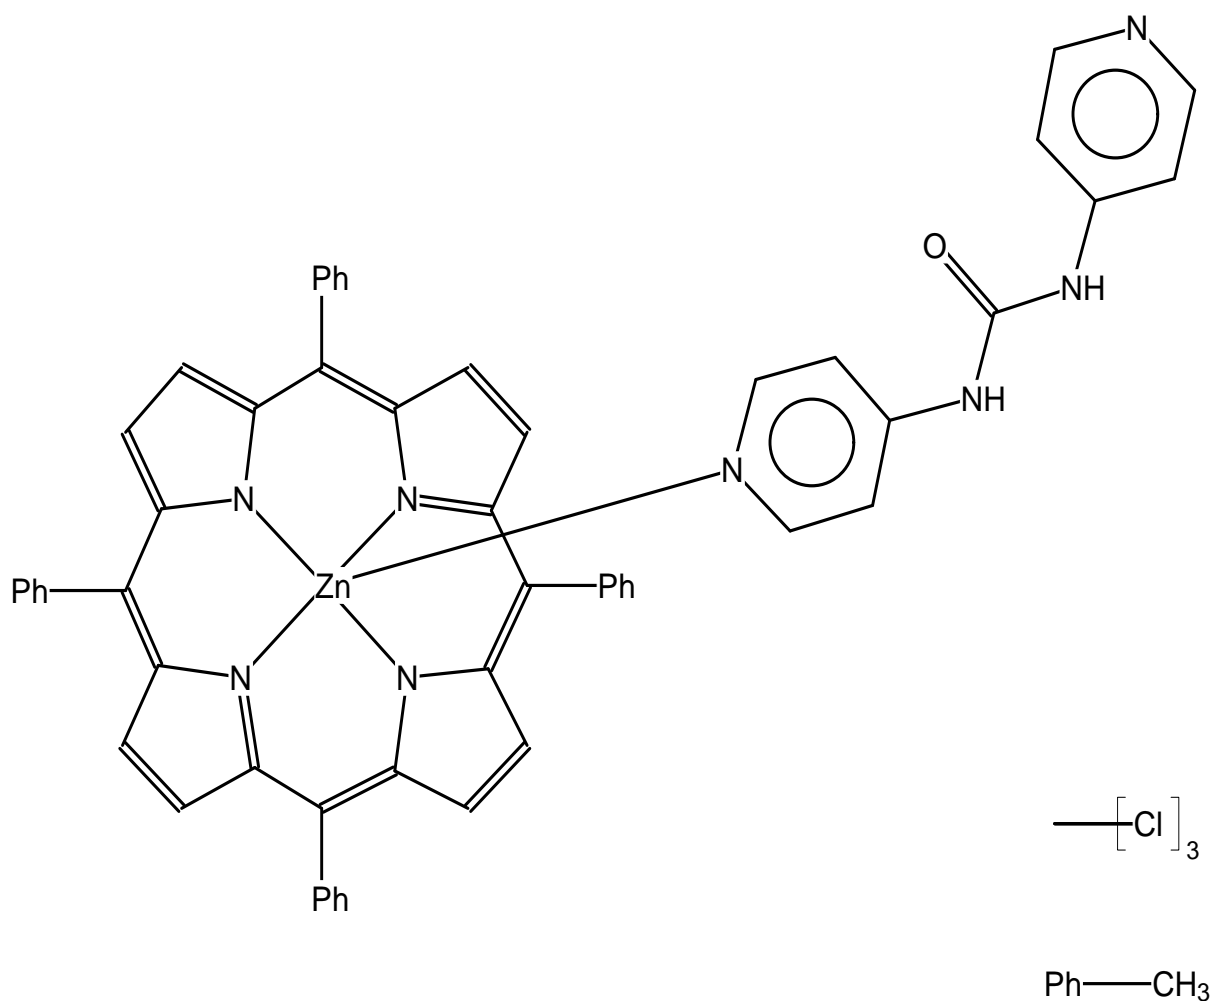

## Search: search1 (Thu Jul 14 03:39:50 2011): Hit 13

### VINBOK

**Reference:** D.K.Kumar, A.Das, P.Dastidar (2007) *Inorg.Chem.* ,**46**, 7351

**Formula:** C<sub>99</sub> H<sub>66</sub> N<sub>12</sub> O<sub>1</sub> Zn<sub>2</sub>, C<sub>47</sub> H<sub>35</sub> N<sub>5</sub> O<sub>1</sub> Zn<sub>1</sub>, 6(C<sub>3</sub> H<sub>7</sub> N<sub>1</sub> O<sub>1</sub>), 2(H<sub>2</sub> O<sub>1</sub>)

**Compound Name:** (μ<sub>2</sub>-N,N'-bis(4-Pyridyl)urea)-bis(5,10,15,20-tetraphenylporphyrinato)-di-zinc(ii) (5,10,15,20-tetraphenylporphyrinato)-zinc(ii) tris(dimethylformamide) clathrate dimethylformamide solvate dihydrate

|                         |      |                        |                    |                                   |                    |
|-------------------------|------|------------------------|--------------------|-----------------------------------|--------------------|
| <b>Space Group:</b>     | P-1  | <b>Cell:</b>           | <b>a</b> 13.365(0) | <b>b</b> 17.511(1)                | <b>c</b> 28.996(1) |
| <b>Space Group No.:</b> | 2    | (Å, °)                 | α 92.68(0)         | β 91.20(0)                        | γ 93.49(0)         |
| <b>R-Factor (%):</b>    | 6.55 | <b>Temperature(K):</b> | 298                | <b>Density(g/cm<sup>3</sup>):</b> | 1.373              |

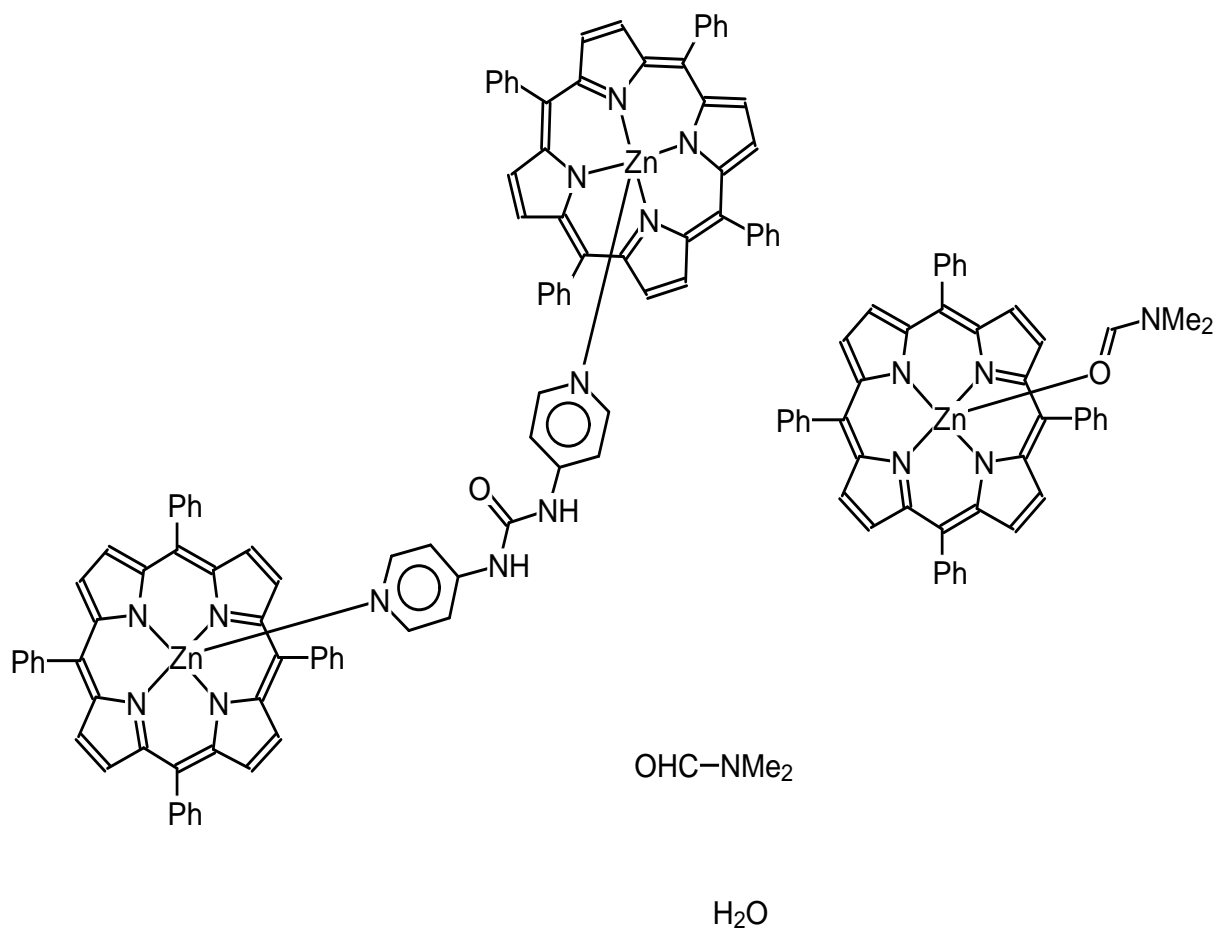

## Search Overview

**Search:** search2  
**Date/Time done:** Sun Nov 20 19:30:17 2011  
**Database(s):** CSD version 5.32 (November 2010)  
CSD version 5.32 updates (Nov 2010)  
**Restriction Info:** No refcode restrictions applied  
**Filters:** None  
**Percentage Completed:** 100%  
**Number of Hits:** 38

*Summary of queries used. Search found structures that:*

match

**Query 1**

**Query 2**

**Query 1**

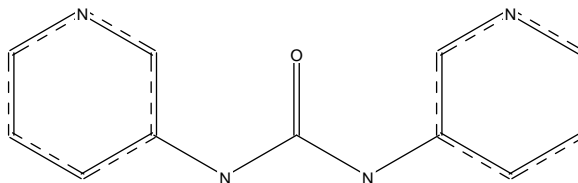

**Query 2**

4M

## Search: search2 (Sun Nov 20 19:30:17 2011): Hit 1

### DEPCIL

**Reference:** D.K.Kumar, A.Das, P.Dastidar (2006) *New J.Chem.* ,**30**, 1267

**Formula:**  $(C_{22} H_{22} Cu_1 N_8 O_3^{2+})_n, 2n(Cl_1 O_4^{1-}), n(H_2 O_1)$

**Compound Name:** catena-(bis( $\mu_3$ -N,N'-bis(3-pyridyl)urea)-aqua-copper(ii) diperchlorate monohydrate)

**Space Group:** P21/c      **Cell:**    **a** 8.797(0)    **b** 17.983(1)    **c** 17.520(1)  
**Space Group No.:** 14      **(Å, °)**     $\alpha$  90.00       $\beta$  90.36(0)     $\gamma$  90.00

**R-Factor (%):** 4.06      **Temperature(K):** 100      **Density(g/cm<sup>3</sup>):** 1.742

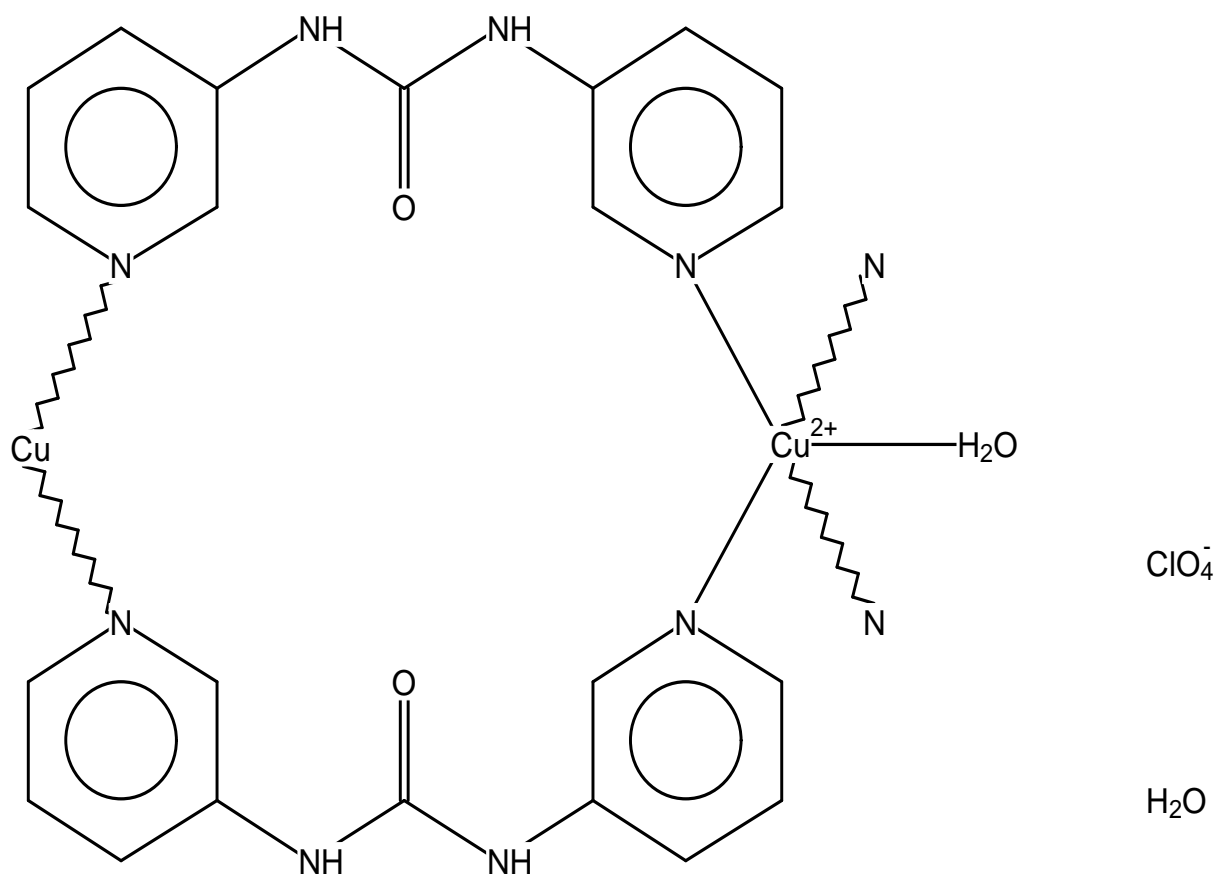



## Search: search2 (Sun Nov 20 19:30:17 2011): Hit 2

### DEPCOR

**Reference:** D.K.Kumar, A.Das, P.Dastidar (2006) *New J.Chem.* ,**30**, 1267

**Formula:**  $(C_{22} H_{22} Cu_1 N_8 O_3^{2+})_n, n(F_6 Si_1^{2-}), 2n(C_2 H_6 O_2), n(H_2 O_1)$

**Compound Name:** catena-(bis( $\mu_2$ -N,N'-bis(3-Pyridyl)urea)-aqua-copper(ii) hexafluorosilicate ethylene glycol solvate monohydrate)

**Space Group:** C2/c      **Cell:**      **a** 21.398(2)      **b** 17.904(1)      **c** 17.439(1)  
**Space Group No.:** 15      **(Å, °)**       $\alpha$  90.00       $\beta$  105.30(0)       $\gamma$  90.00

**R-Factor (%):** 7.26      **Temperature(K):** 100      **Density(g/cm<sup>3</sup>):** 1.637

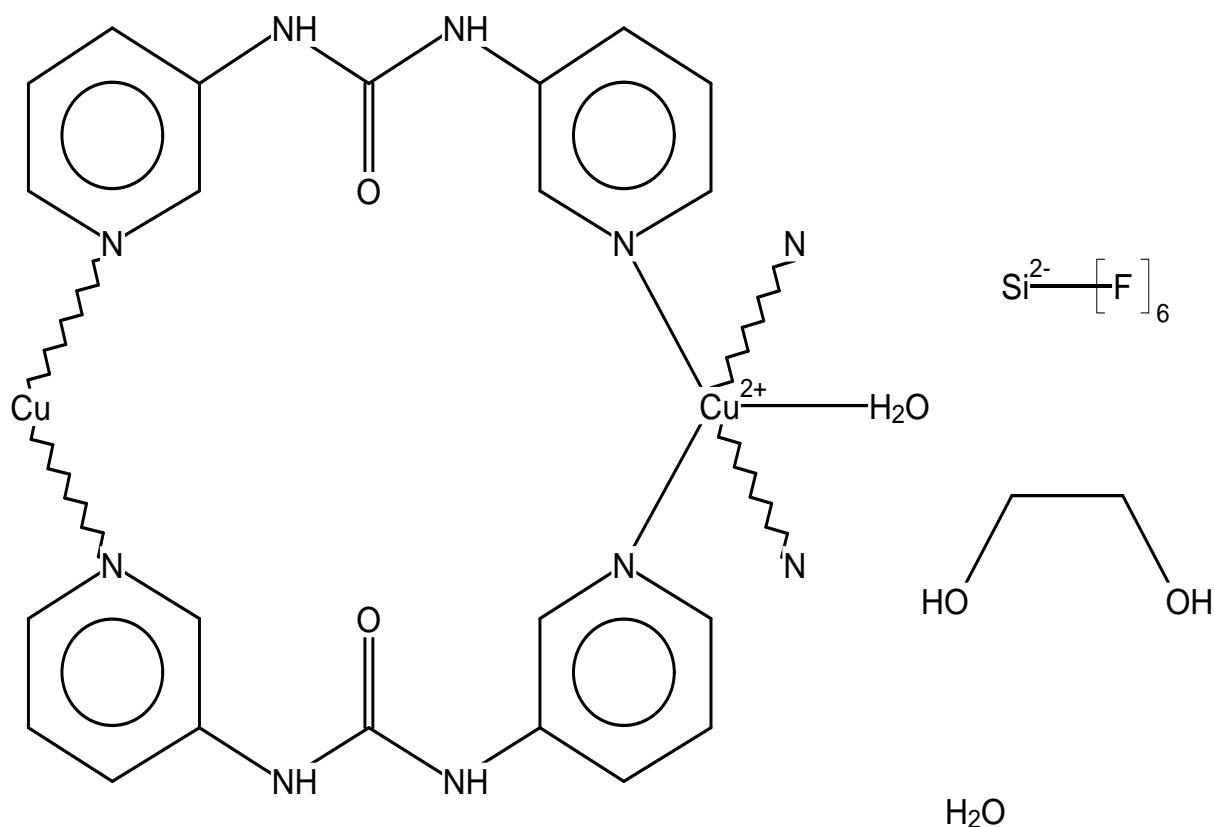

## Search: search2 (Sun Nov 20 19:30:17 2011): Hit 3

### DEPCUX

**Reference:** D.K.Kumar, A.Das, P.Dastidar (2006) *New J.Chem.* ,**30**, 1267

**Formula:**  $(C_{22} H_{22} Cu_1 N_8 O_3^{2+})_n, n(F_6 Si_1^{2-}), 5n(H_2 O_1)$

**Compound Name:** catena-(bis( $\mu_2$ -N,N'-bis(3-Pyridyl)urea)-aqua-copper(ii) hexafluorosilicate pentahydrate)

**Space Group:** C2/c      **Cell:**    **a** 21.211(1)    **b** 17.934(1)    **c** 17.546(1)  
**Space Group No.:** 15      (**Å, °**)     $\alpha$  90.00       $\beta$  104.88(0)     $\gamma$  90.00

**R-Factor (%):** 4.03      **Temperature(K):** 100      **Density(g/cm<sup>3</sup>):** 1.528

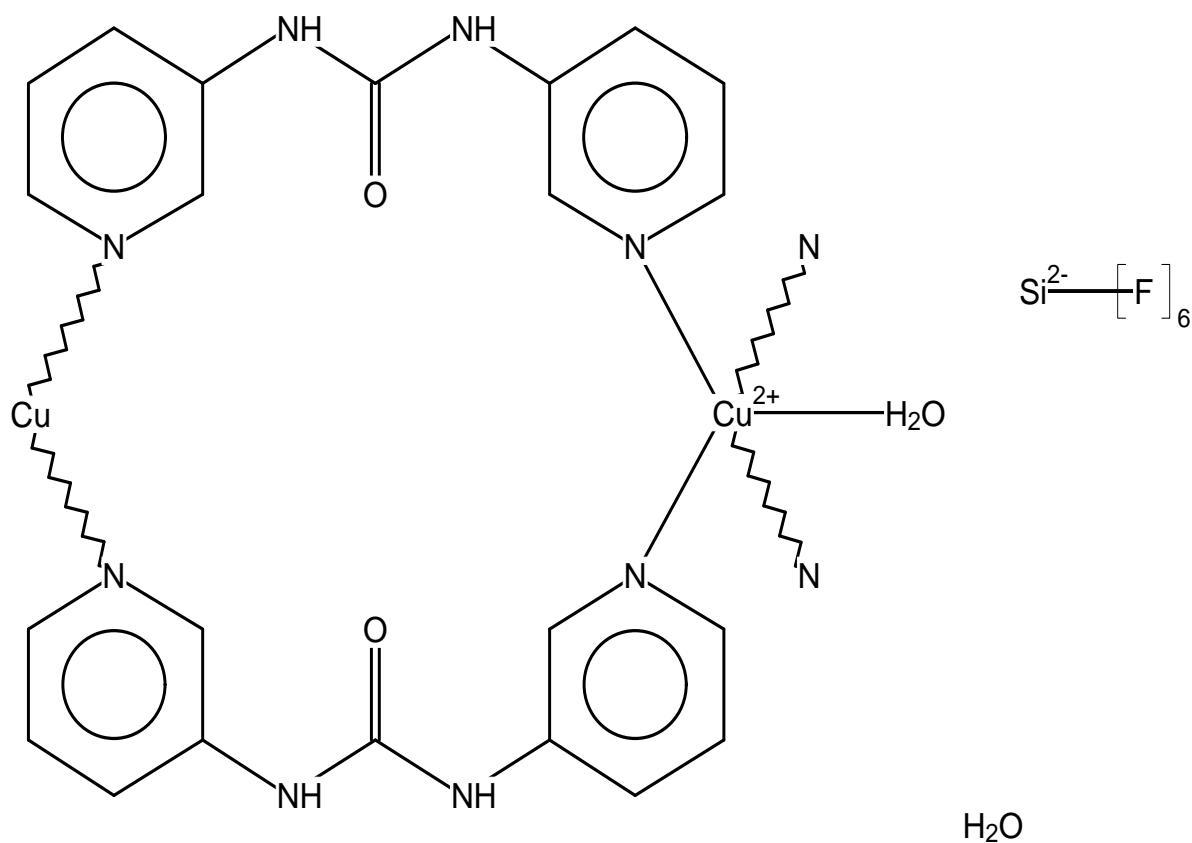

## Search: search2 (Sun Nov 20 19:30:17 2011): Hit 4

### DEPDAE

**Reference:** D.K.Kumar, A.Das, P.Dastidar (2006) *New J.Chem.* ,**30**, 1267

**Formula:** (C<sub>11</sub> H<sub>14</sub> Cu<sub>1</sub> N<sub>4</sub> O<sub>7</sub> S<sub>1</sub>)<sub>n</sub>,n(C<sub>1</sub> H<sub>4</sub> O<sub>1</sub>)

**Compound Name:** catena-(( $\mu_2$ -N,N'-bis(3-Pyridyl)urea)-diaqua-(sulfato-O)-copper(ii) methanol solvate)

**Space Group:** P21/c      **Cell:**      **a** 7.704(4)      **b** 21.708(11)      **c** 12.165(5)  
**Space Group No.:** 14      **(Å, °)**       $\alpha$  90.00       $\beta$  122.77(2)       $\gamma$  90.00

**R-Factor (%):** 4.72      **Temperature(K):** 298      **Density(g/cm<sup>3</sup>):** 1.716

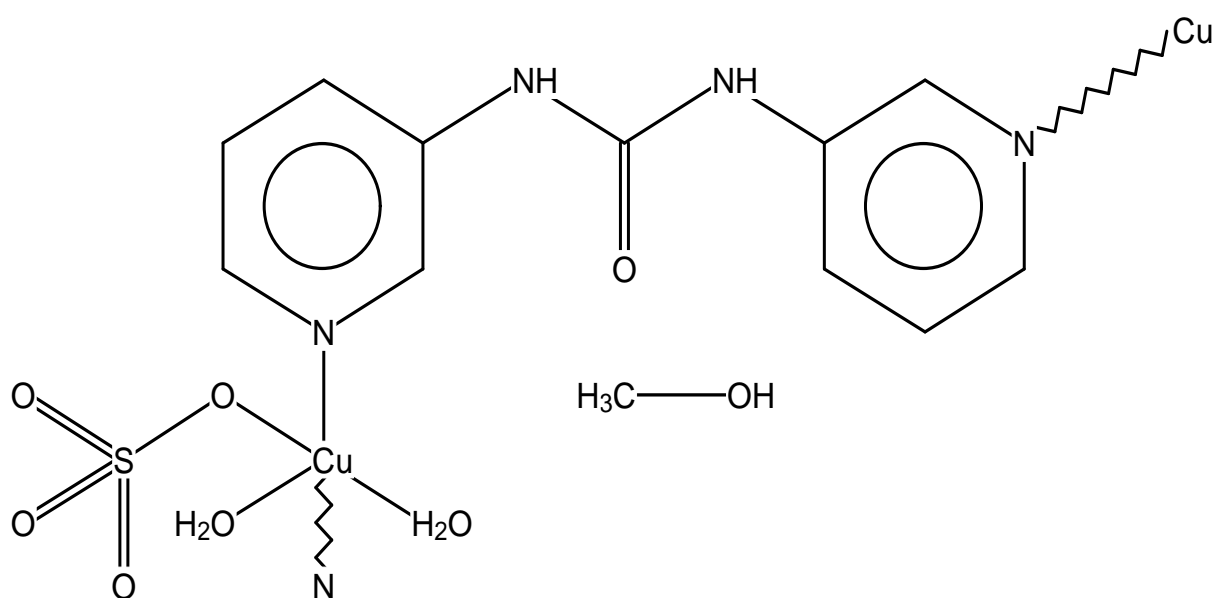

## Search: search2 (Sun Nov 20 19:30:17 2011): Hit 5

### DEPDEI

**Reference:** D.K.Kumar, A.Das, P.Dastidar (2006) *New J.Chem.* ,**30**, 1267

**Formula:**  $(C_{22} H_{32} Cu_2 N_{10} O_{14}^{2+})_n, 2n(N_1 O_3^{1-}), n(C_1 H_4 O_1), n(H_2 O_1)$

**Compound Name:** catena-( $\mu_2$ -bis(N,N'-bis(3-pyridyl)urea)-hexa-aqua-bis(nitrato)-di-copper(ii) dintrate methanol solvate monohydrate)

**Space Group:** P-1      **Cell:**    **a** 8.329(0)    **b** 9.799(0)    **c** 13.155(1)  
**Space Group No.:** 2      **(Å, °)**     $\alpha$  80.12(0)     $\beta$  74.89(0)     $\gamma$  88.20(0)

**R-Factor (%):** 4.28      **Temperature(K):** 100      **Density(g/cm<sup>3</sup>):** 1.564

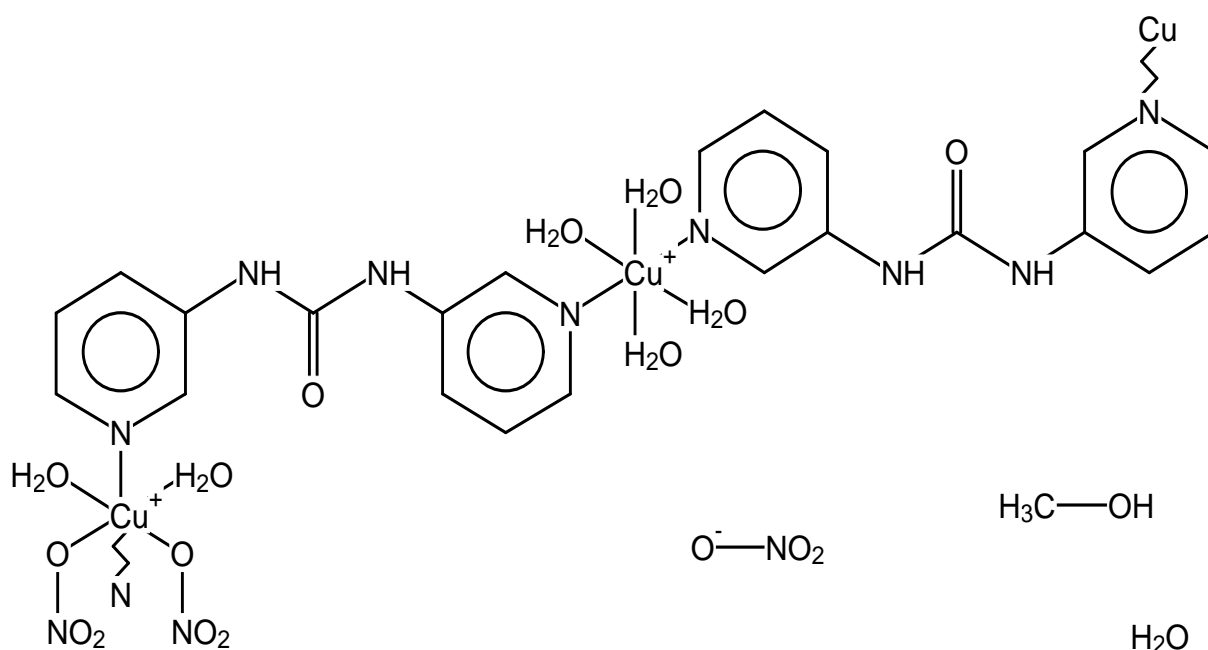

## Search: search2 (Sun Nov 20 19:30:17 2011): Hit 6

### JEXNEG

**Reference:** D.K.Kumar, A.Das, P.Dastidar (2007) *Cryst.Growth Des.* ,  
7,205

**Formula:** (C<sub>11</sub> H<sub>12</sub> Cu<sub>1</sub> N<sub>4</sub> O<sub>6</sub> S<sub>1</sub>)<sub>n</sub>

**Compound Name:** catena-((μ<sub>2</sub>-syn,syn-N,N'-bis(3-Pyridyl)urea)-(μ<sub>2</sub>-sulfato)-aqua-  
copper(ii))

**Space Group:** P21/c      **Cell:**    **a** 4.962(1)    **b** 16.979(5)    **c** 18.354(5)  
**Space Group No.:** 14      **(Å, °)**    **α** 90.00      **β** 91.97(0)      **γ** 90.00

**R-Factor (%):** 6.43      **Temperature(K):** 298      **Density(g/cm<sup>3</sup>):** 1.684

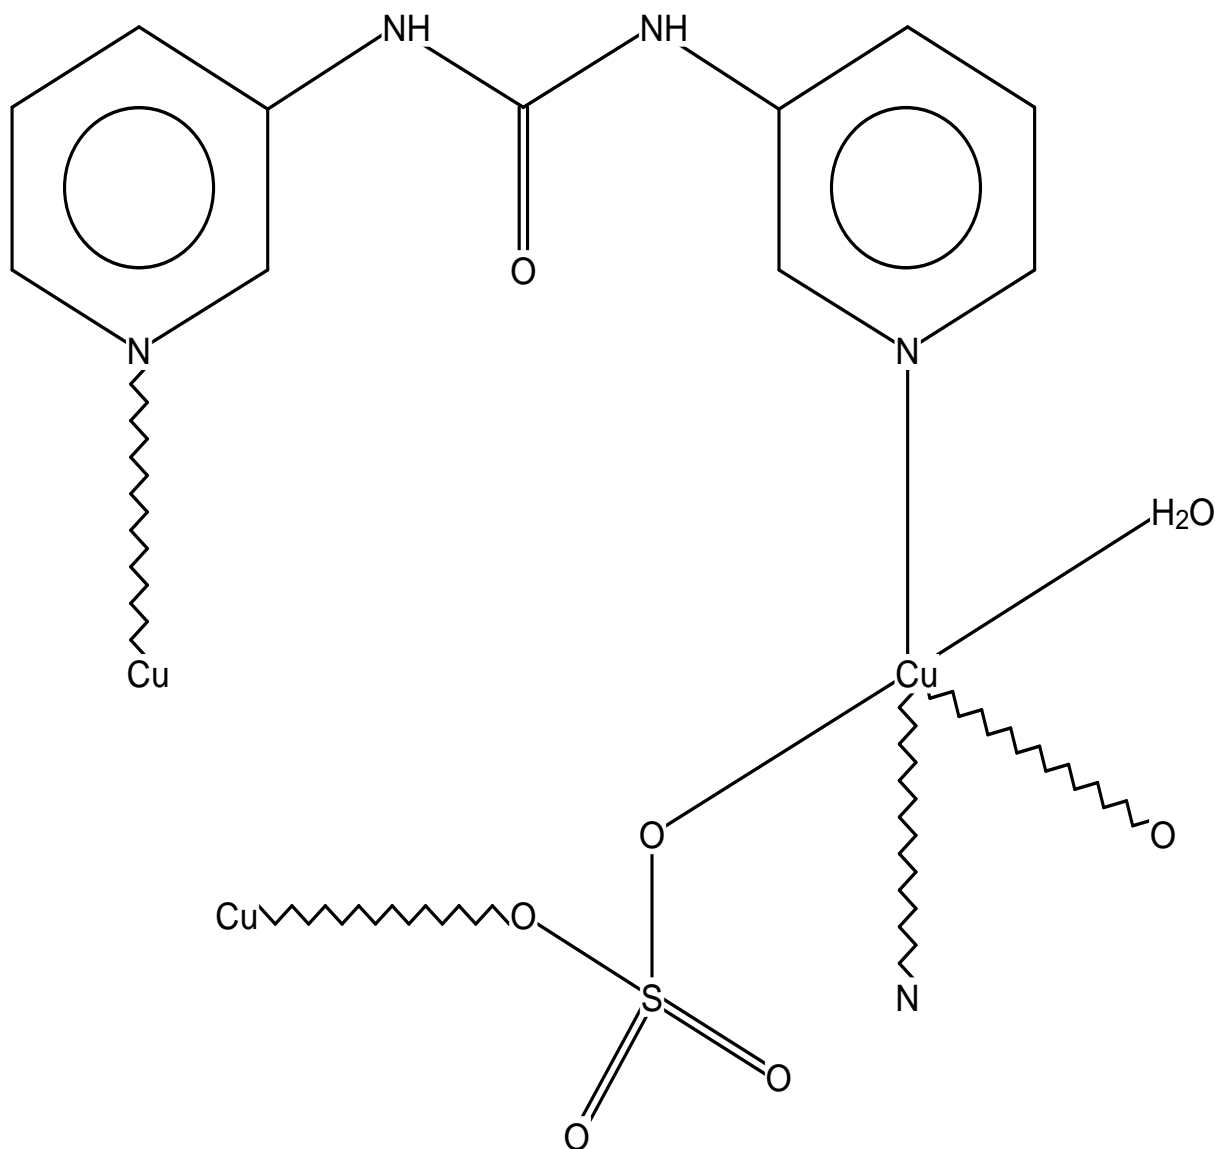

## Search: search2 (Sun Nov 20 19:30:17 2011): Hit 7

JEYZET

**Reference:** D.K.Kumar, A.Das, P.Dastidar (2007) *Cryst.Growth Des.* ,  
7,205

**Formula:**  $(C_{11}H_{14}Cu_1N_4O_7S_1)_n \cdot 2n(H_2O)_1$

**Compound Name:** catena-(( $\mu_2$ -syn,anti-N,N'-bis(3-Pyridyl)urea)-diaqua-(sulfato-O)-  
copper(ii) dihydrate)

**Space Group:** P21/c      **Cell:**    **a** 7.517(0)    **b** 21.771(2)    **c** 12.105(1)  
**Space Group No.:** 14      **(Å, °)**     $\alpha$  90.00       $\beta$  122.87(0)     $\gamma$  90.00

**R-Factor (%):** 4.78      **Temperature(K):** 100      **Density(g/cm<sup>3</sup>):** 1.780

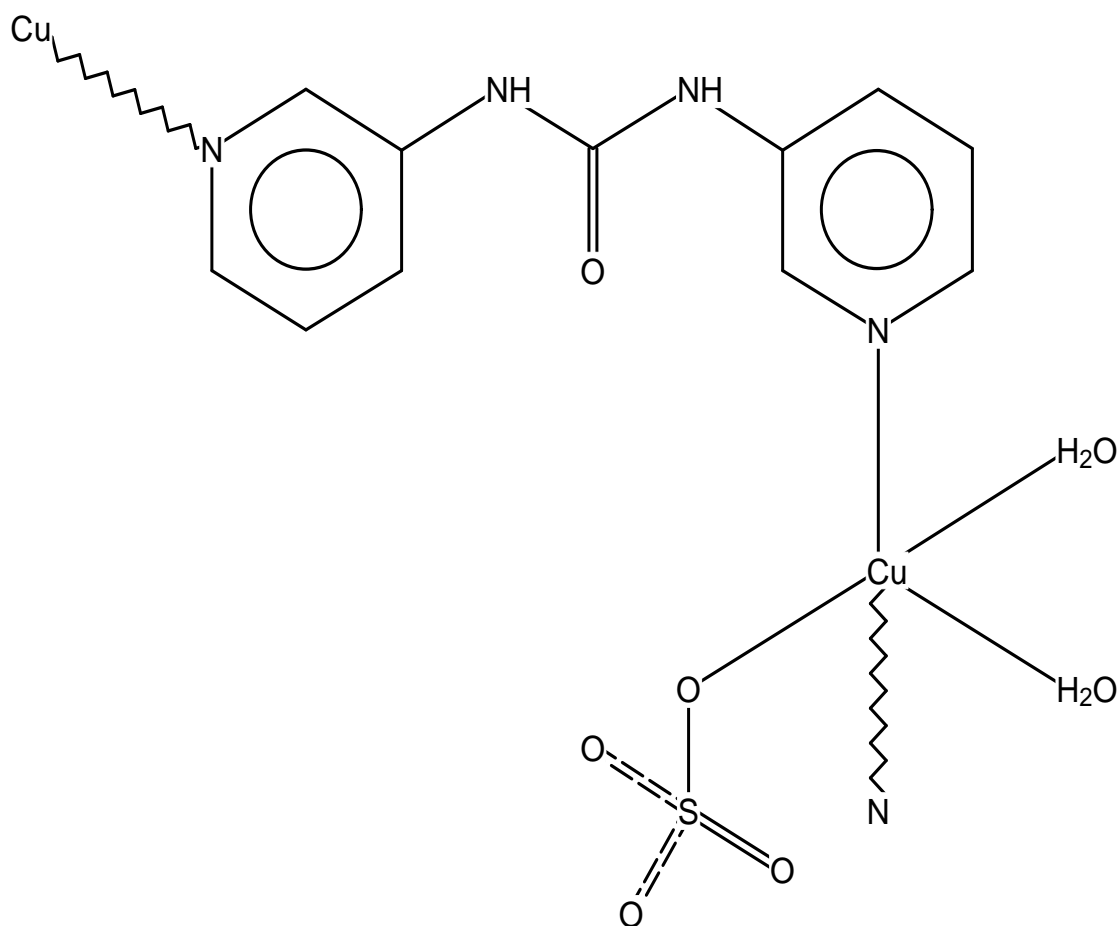

H<sub>2</sub>O

## Search: search2 (Sun Nov 20 19:30:17 2011): Hit 8

KAZWAK

**Reference:** D.K.Kumar, A.Das, P.Dastidar (2006) *Cryst.Growth Des.* ,  
6,216

**Formula:** C<sub>11</sub> H<sub>12</sub> N<sub>4</sub> O<sub>1</sub><sup>2+</sup>, Cl<sub>4</sub> Pt<sub>1</sub><sup>2-</sup>, H<sub>2</sub> O<sub>1</sub>

**Compound Name:** N,N'-bis(3-Pyridinio)urea tetrachloro-platinum monohydrate

**Space Group:** P-1      **Cell:**    **a** 6.743(0)    **b** 8.114(1)    **c** 16.254(2)  
**Space Group No.:** 2      **(Å, °)**     $\alpha$  102.91(0)     $\beta$  90.13(0)     $\gamma$  106.97(0)

**R-Factor (%):** 2.39      **Temperature(K):** 278      **Density(g/cm<sup>3</sup>):** 2.294

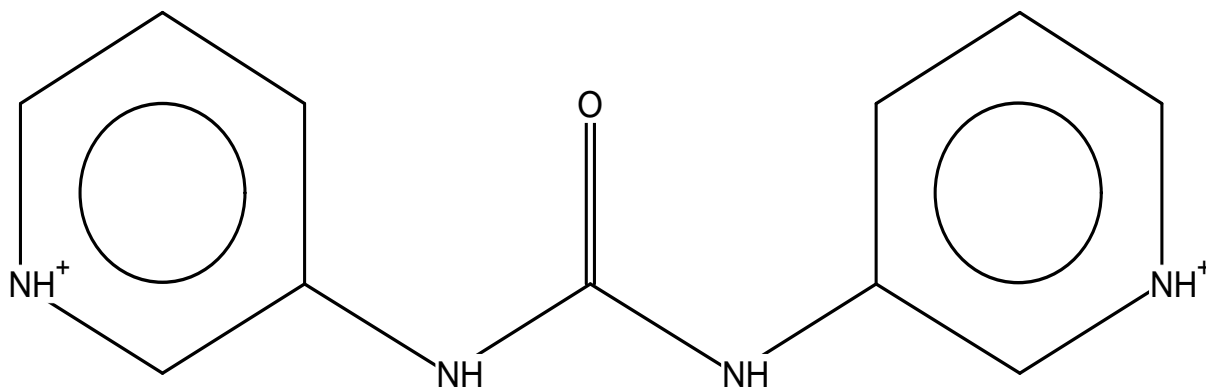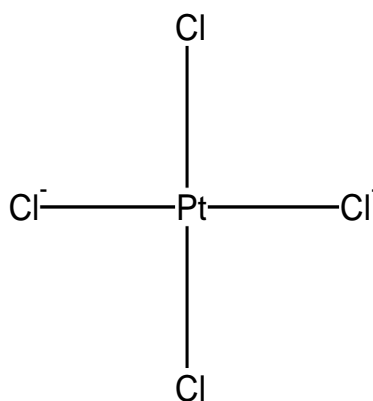

H<sub>2</sub>O

## Search: search2 (Sun Nov 20 19:30:17 2011): Hit 9

### LISCAS

**Reference:** D.K.Kumar, A.Das, P.Dastidar (2007) *Cryst.Growth Des.* ,  
7,2096

**Formula:**  $C_{44} H_{44} Cd_1 N_{16} O_6^{2+}, 2(N_1 O_3^{1-}), 2(C_1 H_4 O_1), 6(H_2 O_1)$

**Compound Name:** Diaqua-tetrakis(N,N'-bis(3-pyridyl)urea-N'')-cadmium(ii) dinitrate  
methanol solvate hexahydrate

**Space Group:** P-1      **Cell:**    **a** 9.864(0)    **b** 11.262(0)    **c** 14.312(1)  
**Space Group No.:** 2      **(Å, °)**     $\alpha$  69.65(0)     $\beta$  78.81(0)     $\gamma$  81.99(0)

**R-Factor (%):** 4.10      **Temperature(K):** 100      **Density(g/cm<sup>3</sup>):** 1.482

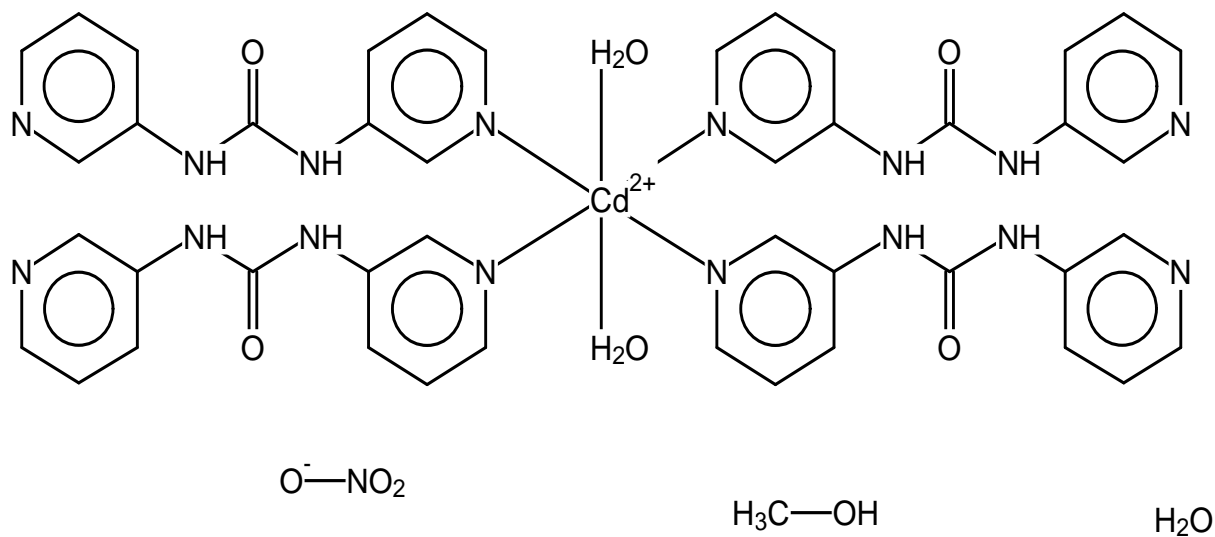



## Search: search2 (Sun Nov 20 19:30:17 2011): Hit 10

LISCEW

**Reference:** D.K.Kumar, A.Das, P.Dastidar (2007) *Cryst.Growth Des.* ,  
7,2096

**Formula:**  $(C_{11}H_{16}Cd_1N_5O_7^{1+})_n, n(N_1O_3^{1-}), 0.5n(C_8H_{10}), n(H_2O_1)$

**Compound Name:** catena-(( $\mu_2$ -N,N'-bis(3-Pyridyl)urea-N'',N''')-triaqua-(nitrate-O)-cadmium nitrate o-xylene solvate monohydrate)

**Space Group:** P21/n      **Cell:**      **a** 7.591(0)      **b** 17.512(1)      **c** 16.596(1)  
**Space Group No.:** 14      **(Å, °)**       $\alpha$  90.00       $\beta$  99.38(0)       $\gamma$  90.00

**R-Factor (%):** 4.37      **Temperature(K):** 100      **Density(g/cm<sup>3</sup>):** 1.757

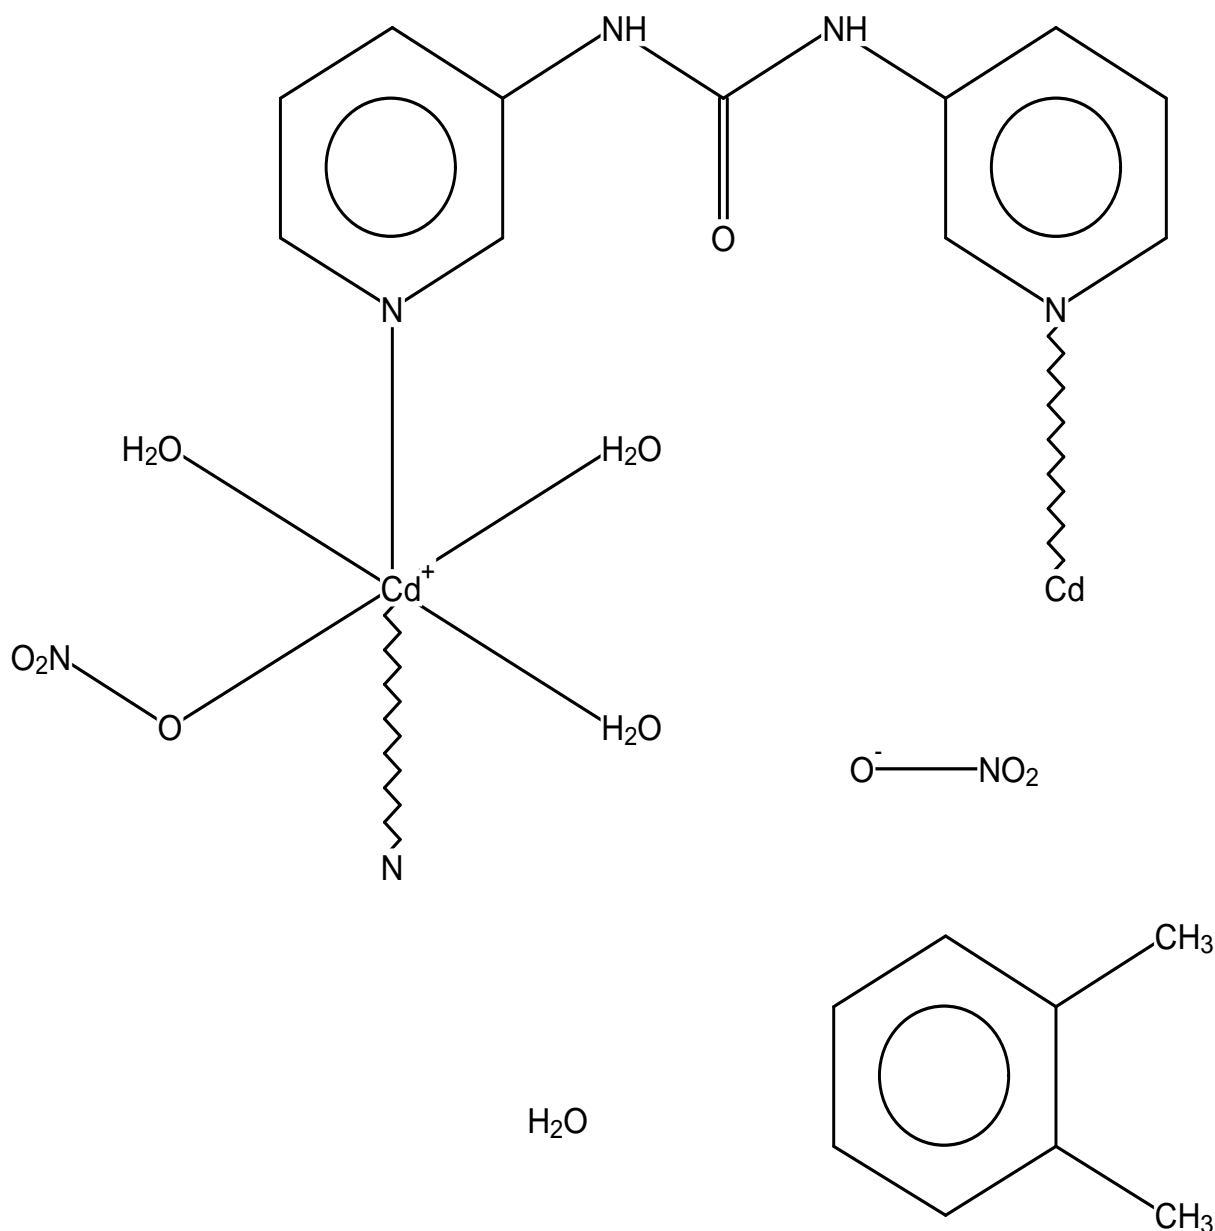

## Search: search2 (Sun Nov 20 19:30:17 2011): Hit 11

### LISCIA

**Reference:** D.K.Kumar, A.Das, P.Dastidar (2007) *Cryst.Growth Des.* ,  
7,2096

**Formula:**  $C_{44} H_{44} Cd_1 N_{16} O_6^{2+}, 2(N_1 O_3^{1-})$

**Compound Name:** Diaqua-tetrakis(N,N'-bis(3-pyridyl)urea-N'')-cadmium(ii) dinitrate

**Space Group:** C2/c      **Cell:**    **a** 24.516(3)    **b** 15.330(1)    **c** 14.531(1)  
**Space Group No.:** 15      **(Å, °)**     $\alpha$  90.00       $\beta$  120.43(0)     $\gamma$  90.00

**R-Factor (%):** 3.51      **Temperature(K):** 100      **Density(g/cm<sup>3</sup>):** 1.593

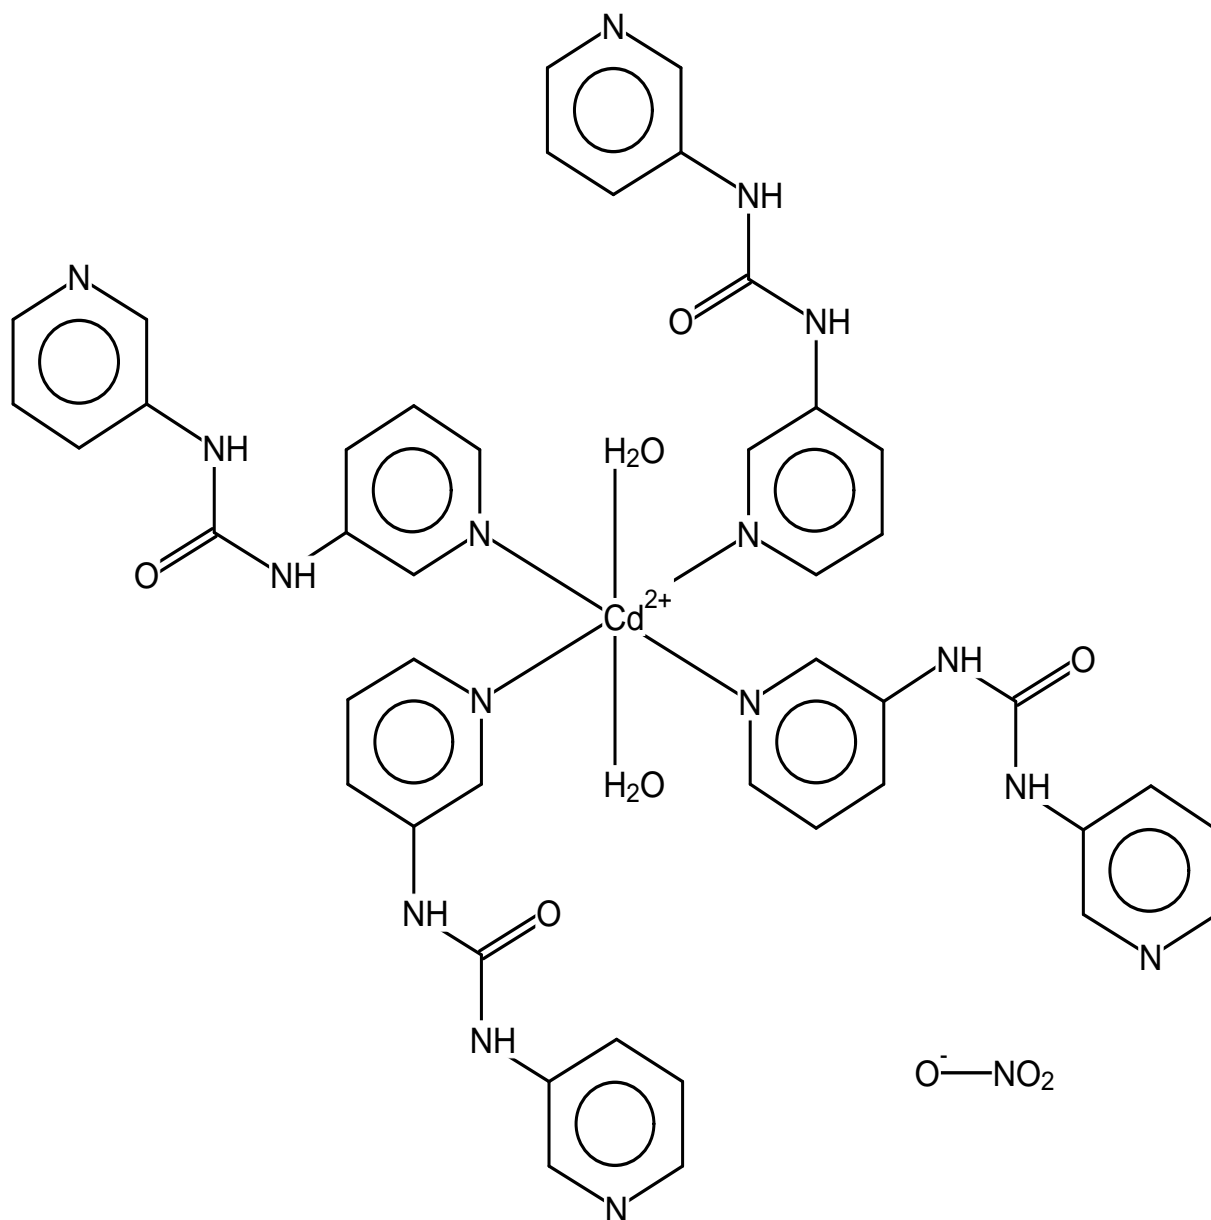

## Search: search2 (Sun Nov 20 19:30:17 2011): Hit 12

### LISCOG

**Reference:** D.K.Kumar, A.Das, P.Dastidar (2007) *Cryst.Growth Des.* ,  
7,2096

**Formula:**  $C_{44} H_{44} Cd_1 N_{16} O_6^{2+}, 2(N_1 O_3^{1-}), C_8 H_{10}, 2(H_2 O_1)$

**Compound Name:** Diaqua-tetrakis(N,N'-bis(3-pyridyl)urea-N'')-cadmium(ii) dinitrate p-xylene solvate dihydrate

**Space Group:** P-1      **Cell:**    **a** 7.435(2)    **b** 13.696(4)    **c** 14.030(4)  
**Space Group No.:** 2      **(Å, °)**     $\alpha$  102.14(0)     $\beta$  92.28(0)     $\gamma$  92.16(0)

**R-Factor (%):** 4.89      **Temperature(K):** 150      **Density(g/cm<sup>3</sup>):** 1.515

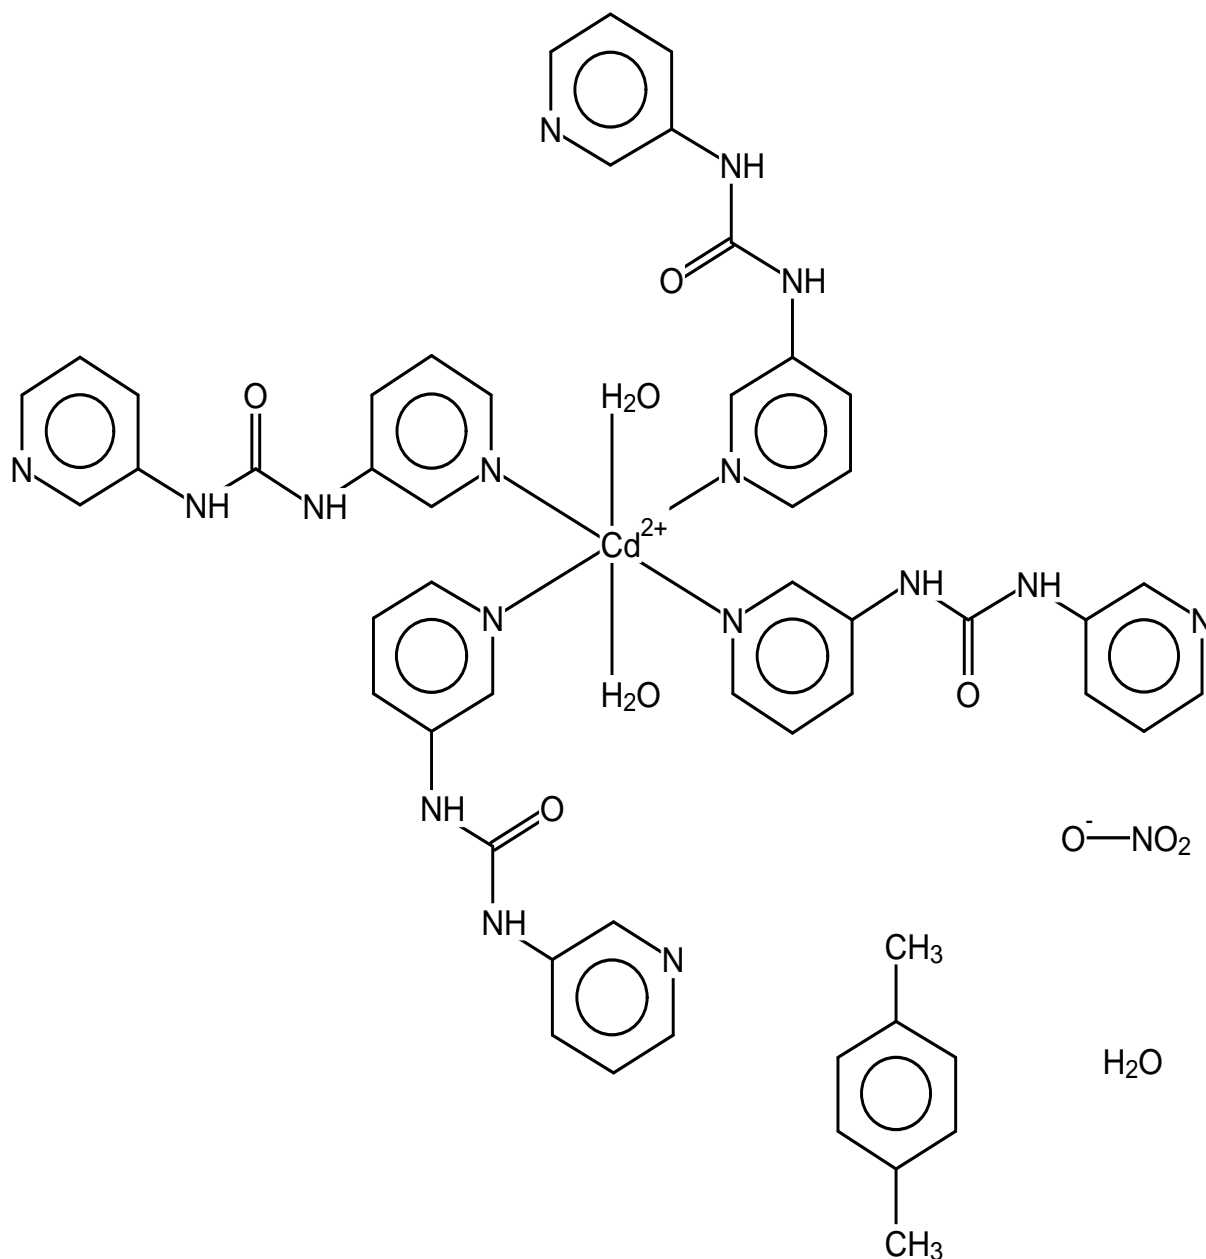

## Search: search2 (Sun Nov 20 19:30:17 2011): Hit 13

### LISCUM

**Reference:** D.K.Kumar, A.Das, P.Dastidar (2007) *Cryst.Growth Des.* ,  
7,2096

**Formula:** (C<sub>11</sub> H<sub>16</sub> Cd<sub>1</sub> N<sub>5</sub> O<sub>7</sub><sup>1+</sup>)<sub>n</sub>,n(N<sub>1</sub> O<sub>3</sub><sup>1-</sup>),n(C<sub>2</sub> H<sub>6</sub> O<sub>1</sub>)

**Compound Name:** catena-((μ<sub>2</sub>-N,N'-bis(3-Pyridyl)urea-N'',N''')-triaqua-(nitrate-O,O')-  
cadmium nitrate ethanol solvate)

**Space Group:** Pbcn      **Cell:**      **a** 16.212(4)      **b** 18.776(5)      **c** 13.907(4)  
**Space Group No.:** 60      **(Å, °)**      α 90.00      β 90.00      γ 90.00

**R-Factor (%):** 7.48      **Temperature(K):** 100      **Density(g/cm<sup>3</sup>):** 1.728

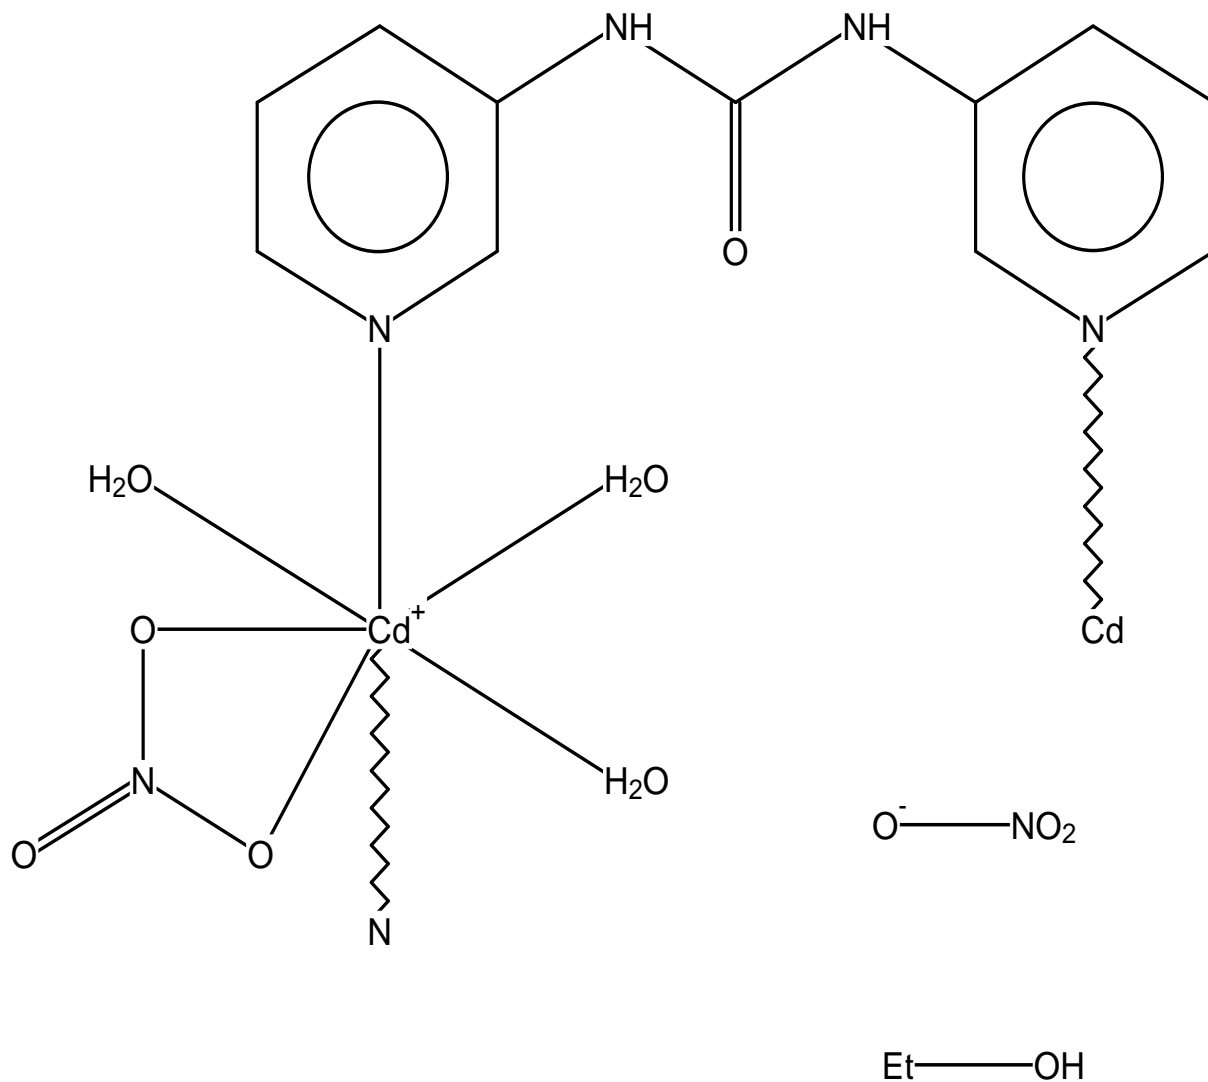

## Search: search2 (Sun Nov 20 19:30:17 2011): Hit 14

LISDAT

**Reference:** D.K.Kumar, A.Das, P.Dastidar (2007) *Cryst.Growth Des.* ,  
7,2096

**Formula:** (C<sub>22</sub> H<sub>20</sub> Cd<sub>1</sub> N<sub>10</sub> O<sub>8</sub>)<sub>n</sub>

**Compound Name:** catena-(bis(μ<sub>2</sub>-N,N'-bis(3-Pyridyl)urea-N'',N''')-bis(nitrato-O)-cadmium)

**Space Group:** P21/n      **Cell:**      **a** 9.622(1)      **b** 10.242(1)      **c** 12.840(1)  
**Space Group No.:** 14      **(Å, °)**      α 90.00      β 95.36(0)      γ 90.00

**R-Factor (%):** 3.31      **Temperature(K):** 100      **Density(g/cm<sup>3</sup>):** 1.753

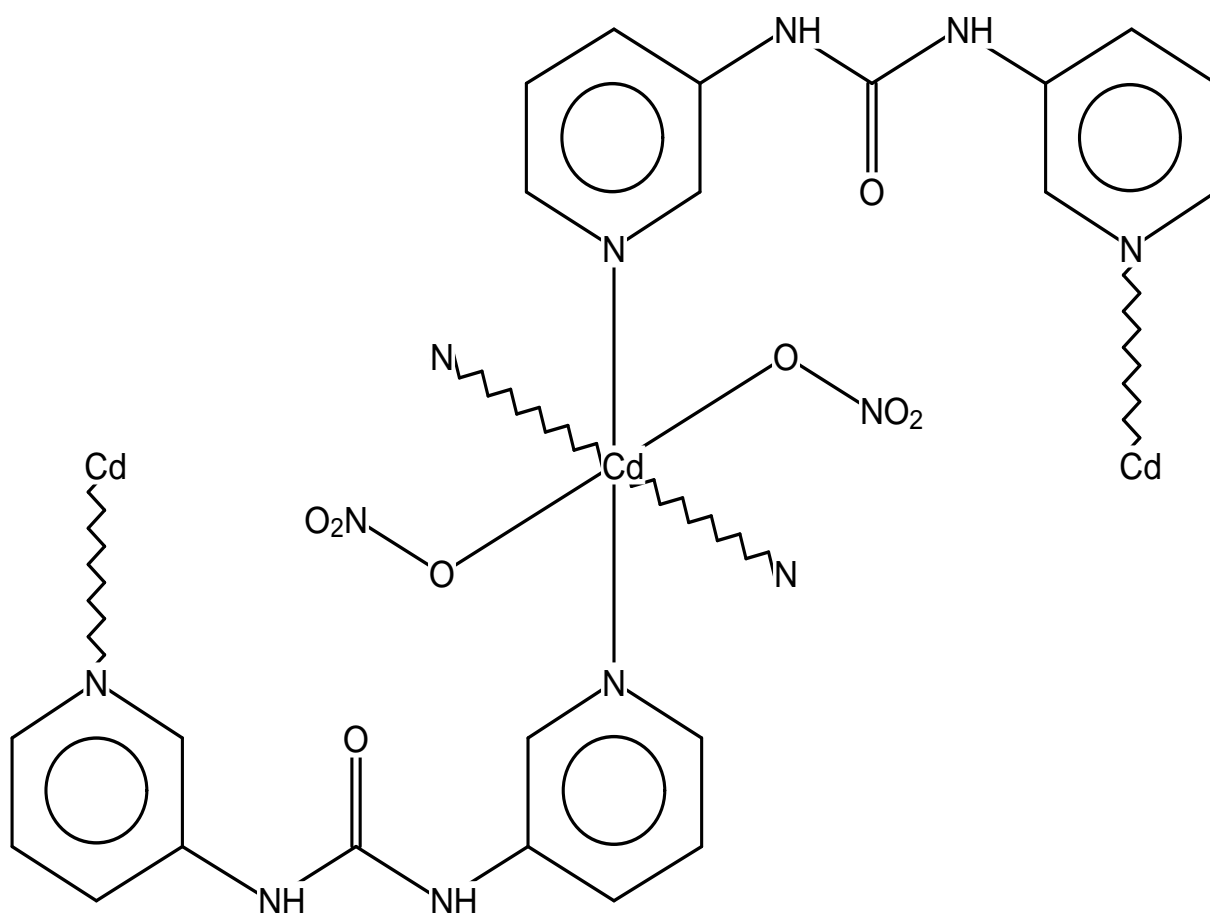

## Search: search2 (Sun Nov 20 19:30:17 2011): Hit 15

NAVWIR

**Reference:** D.K.Kumar, D.A.Jose, A.Das, P.Dastidar (2005)  
*Inorg.Chem.* ,**44**,6933

**Formula:** (C<sub>22</sub> H<sub>20</sub> N<sub>8</sub> O<sub>2</sub> Zn<sub>1</sub> <sup>2+</sup>)<sub>n</sub>,2n(Cl<sub>1</sub> O<sub>4</sub> <sup>1-</sup>)

**Compound Name:** catena-(μ<sub>2</sub>-bis(N,N'-bis(3-Pyridyl)urea)-zinc(ii) diperchlorate)

**Space Group:** P42/n      **Cell:**      **a** 12.054(1)      **b** 12.054(1)      **c** 9.280(1)  
**Space Group No.:** 86      **(Å, °)**      **α** 90.00      **β** 90.00      **γ** 90.00

**R-Factor (%):** 5.80      **Temperature(K):** 298      **Density(g/cm<sup>3</sup>):** 1.706

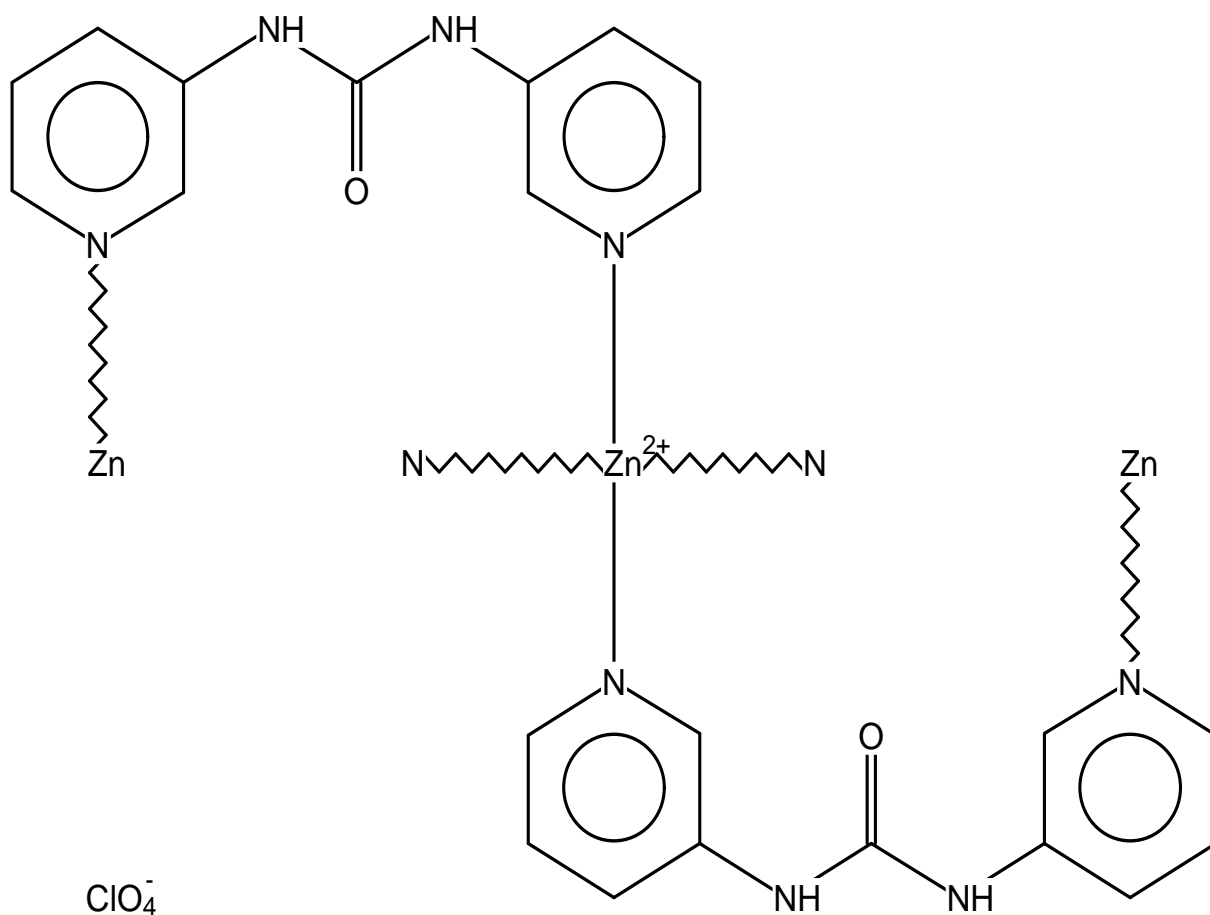

## Search: search2 (Sun Nov 20 19:30:17 2011): Hit 16

NAVWIR01

**Reference:** D.K.Kumar, D.A.Jose, A.Das, P.Dastidar (2005)  
*Inorg.Chem.* ,**44**,6933

**Formula:** (C<sub>22</sub> H<sub>20</sub> N<sub>8</sub> O<sub>2</sub> Zn<sub>1</sub><sup>2+</sup>)<sub>n</sub>,2n(Cl<sub>1</sub> O<sub>4</sub><sup>1-</sup>)

**Compound Name:** catena-(bis(μ<sub>2</sub>-N,N'-bis(3-Pyridyl)urea)-zinc(ii) diperchlorate)

**Space Group:** I41/a      **Cell:**    **a** 16.899(0)    **b** 16.899(0)    **c** 18.460(1)  
**Space Group No.:** 88      **(Å, °)**    **α** 90.00      **β** 90.00      **γ** 90.00

**R-Factor (%):** 2.51      **Temperature(K):** 100      **Density(g/cm<sup>3</sup>):** 1.746

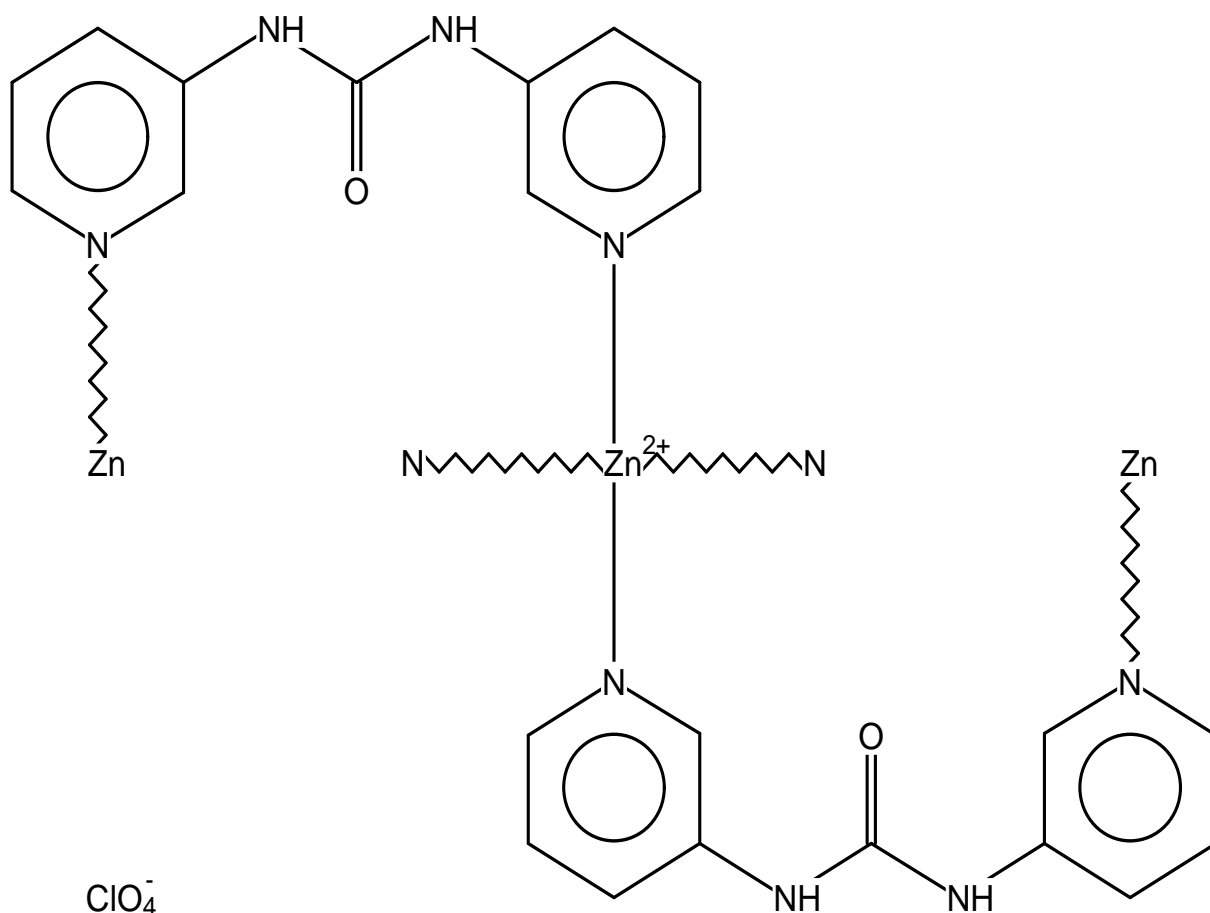

## Search: search2 (Sun Nov 20 19:30:17 2011): Hit 17

NAVWIR02

**Reference:** R.Custelcean, B.A.Moyer, V.S.Bryantsev, B.P.Hay (2006)  
*Cryst.Growth Des.* ,6,555

**Formula:** (C<sub>22</sub> H<sub>20</sub> N<sub>8</sub> O<sub>2</sub> Zn<sub>1</sub> <sup>2+</sup>)<sub>n</sub>,2n(Cl<sub>1</sub> O<sub>4</sub> <sup>1-</sup>)

**Compound Name:** catena-(bis(μ<sub>2</sub>-N,N'-bis(3-Pyridyl)urea-N,N')-zinc diperchlorate)

**Space Group:** I41/a      **Cell:**      **a** 16.946(1)      **b** 16.946(1)      **c** 18.477(3)  
**Space Group No.:** 88      **(Å, °)**      α 90.00      β 90.00      γ 90.00

**R-Factor (%):** 6.32      **Temperature(K):** 173      **Density(g/cm<sup>3</sup>):** 1.734

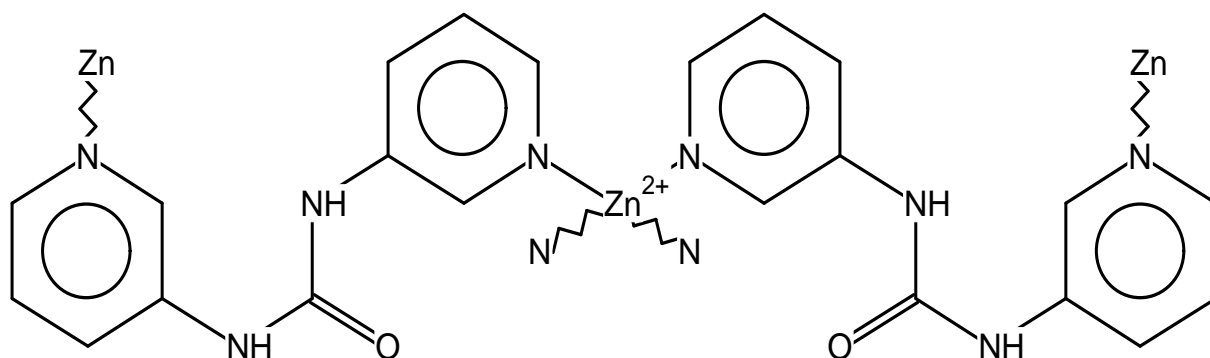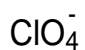



## Search: search2 (Sun Nov 20 19:30:17 2011): Hit 18

NEMJOF

**Reference:** R.Custelcean, T.H.Haverlock, B.A.Moyer (2006)  
*Inorg.Chem.* ,**45**,6446

**Formula:** (C<sub>11</sub> H<sub>10</sub> Cl<sub>2</sub> N<sub>4</sub> O<sub>1</sub> Zn<sub>1</sub>)<sub>n</sub>

**Compound Name:** catena-((μ<sub>2</sub>-N,N'-bis(3-pyridyl)urea)-dichloro-zinc)

**Space Group:** Fdd2      **Cell:**    **a** 18.230(2)    **b** 9.829(1)    **c** 15.879(1)  
**Space Group No.:** 43      **(Å, °)**    **α** 90.00      **β** 90.00      **γ** 90.00

**R-Factor (%):** 1.52      **Temperature(K):** 173      **Density(g/cm<sup>3</sup>):** 1.636

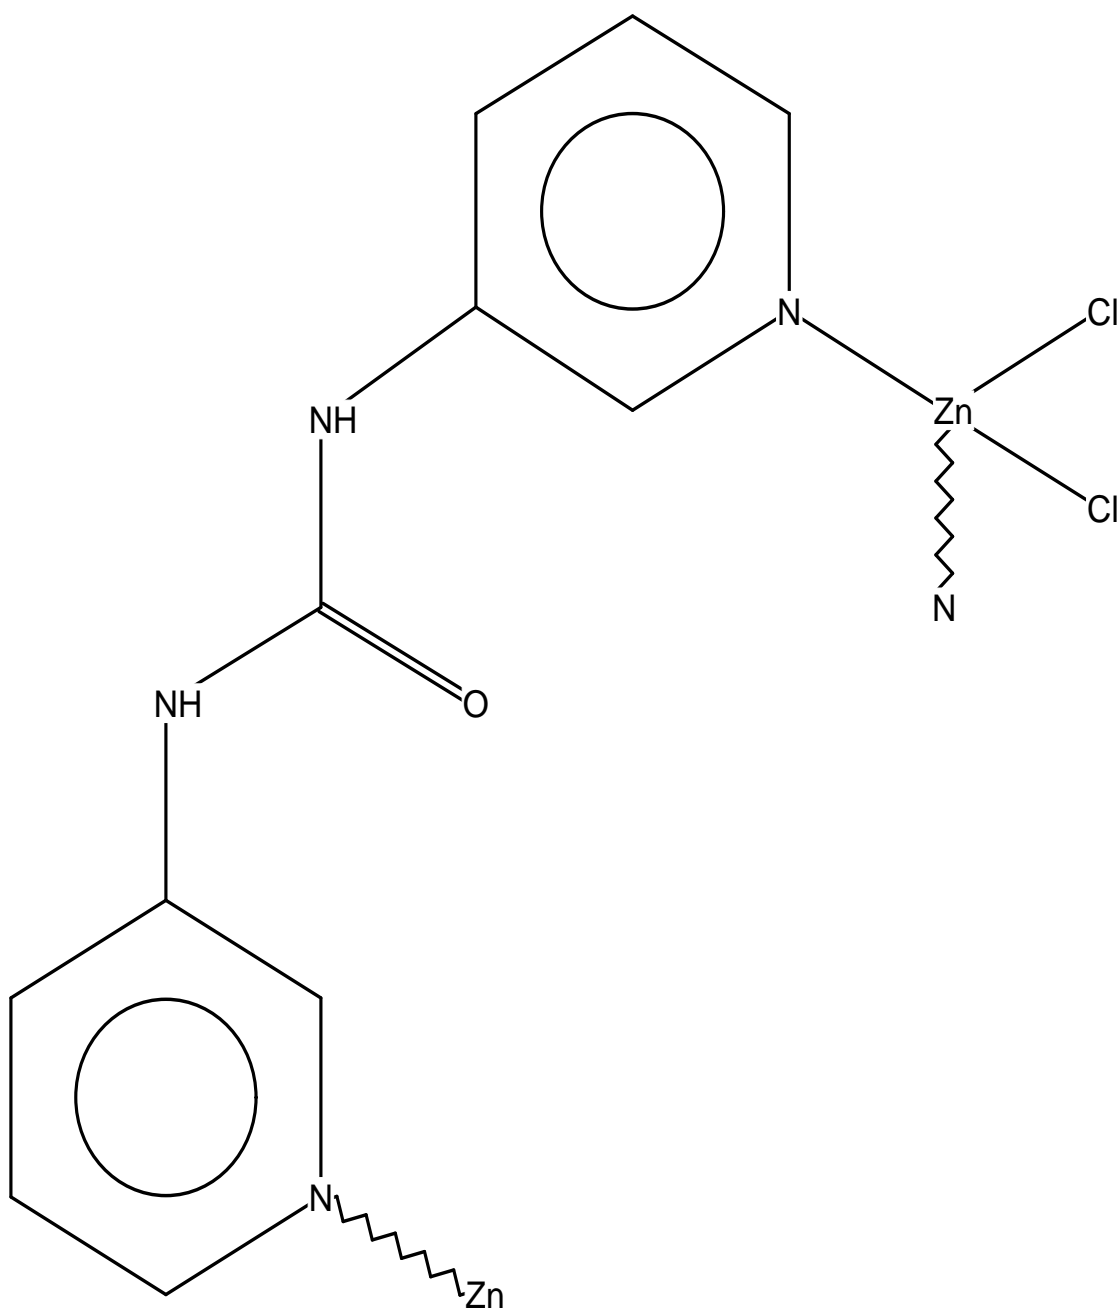

## Search: search2 (Sun Nov 20 19:30:17 2011): Hit 19

NEMJOF01

**Reference:** D.K.Kumar, A.Das, P.Dastidar (2006) *CrystEngComm*, **8**, 805

**Formula:** (C<sub>11</sub> H<sub>10</sub> Cl<sub>2</sub> N<sub>4</sub> O<sub>1</sub> Zn<sub>1</sub>)<sub>n</sub>

**Compound Name:** catena-((μ<sub>2</sub>-N,N'-bis(3-Pyridyl)urea)-dichloro-zinc(ii))

**Space Group:** Fdd2      **Cell:**    **a** 18.371(3)    **b** 9.867(1)    **c** 15.866(3)  
**Space Group No.:** 43      (**Å, °**)    **α** 90.00      **β** 90.00      **γ** 90.00

**R-Factor (%):** 3.01      **Temperature(K):** 100      **Density(g/cm<sup>3</sup>):** 1.619

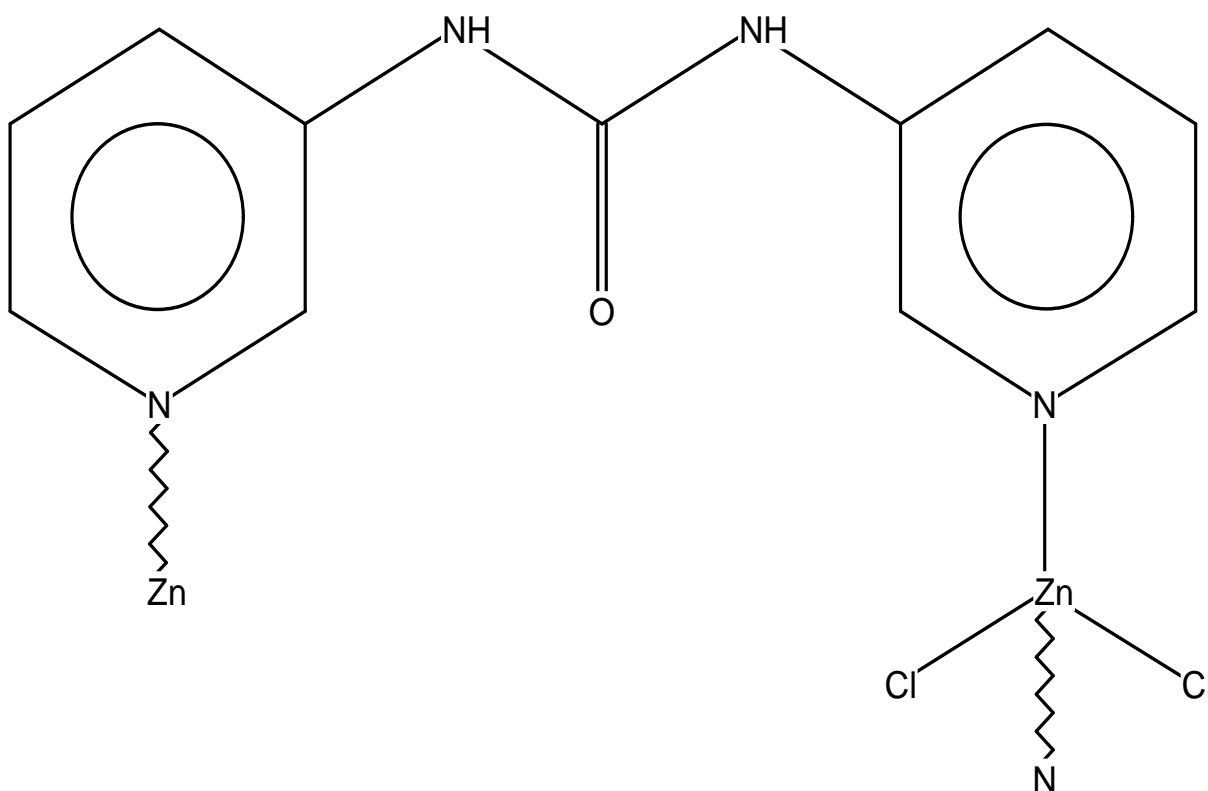

## Search: search2 (Sun Nov 20 19:30:17 2011): Hit 20

NEMJUL

**Reference:** R.Custelcean, T.H.Haverlock, B.A.Moyer (2006)  
*Inorg.Chem.* ,**45**,6446

**Formula:** (C<sub>11</sub> H<sub>10</sub> Br<sub>2</sub> N<sub>4</sub> O<sub>1</sub> Zn<sub>1</sub>)<sub>n</sub>

**Compound Name:** catena-((μ<sub>2</sub>-N,N'-bis(3-pyridyl)urea)-dibromo-zinc)

**Space Group:** P21/c      **Cell:**      **a** 10.060(1)      **b** 16.763(1)      **c** 8.420(0)  
**Space Group No.:** 14      **(Å, °)**      **α** 90.00      **β** 104.00(0)      **γ** 90.00

**R-Factor (%):** 1.90      **Temperature(K):** 273      **Density(g/cm<sup>3</sup>):** 2.119

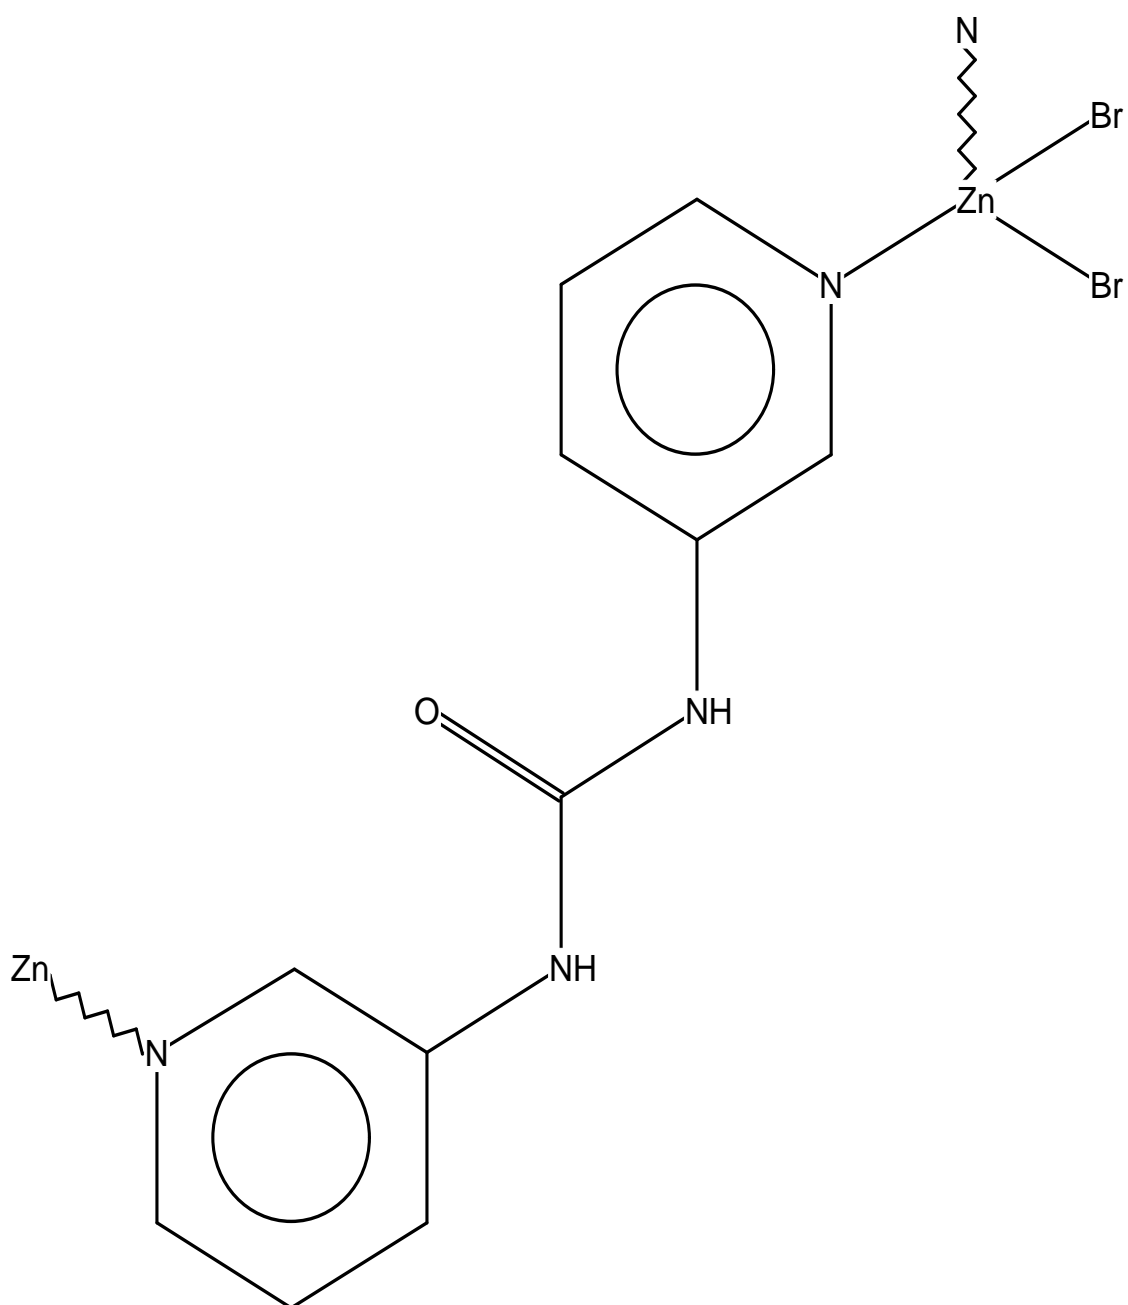

## Search: search2 (Sun Nov 20 19:30:17 2011): Hit 21

### NEMKAS

**Reference:** R.Custelcean, T.H.Haverlock, B.A.Moyer (2006)  
*Inorg.Chem.* ,**45**,6446

**Formula:** (C<sub>11</sub> H<sub>10</sub> I<sub>2</sub> N<sub>4</sub> O<sub>1</sub> Zn<sub>1</sub>)<sub>n</sub>

**Compound Name:** catena-((μ<sub>2</sub>-N,N'-bis(3-pyridyl)urea)-diiodo-zinc)

**Space Group:** P21/c      **Cell:**    **a** 10.150(1)    **b** 17.116(1)    **c** 8.758(1)  
**Space Group No.:** 14      **(Å, °)**    **α** 90.00      **β** 104.88(0)    **γ** 90.00

**R-Factor (%):** 1.95      **Temperature(K):** 173      **Density(g/cm<sup>3</sup>):** 2.410

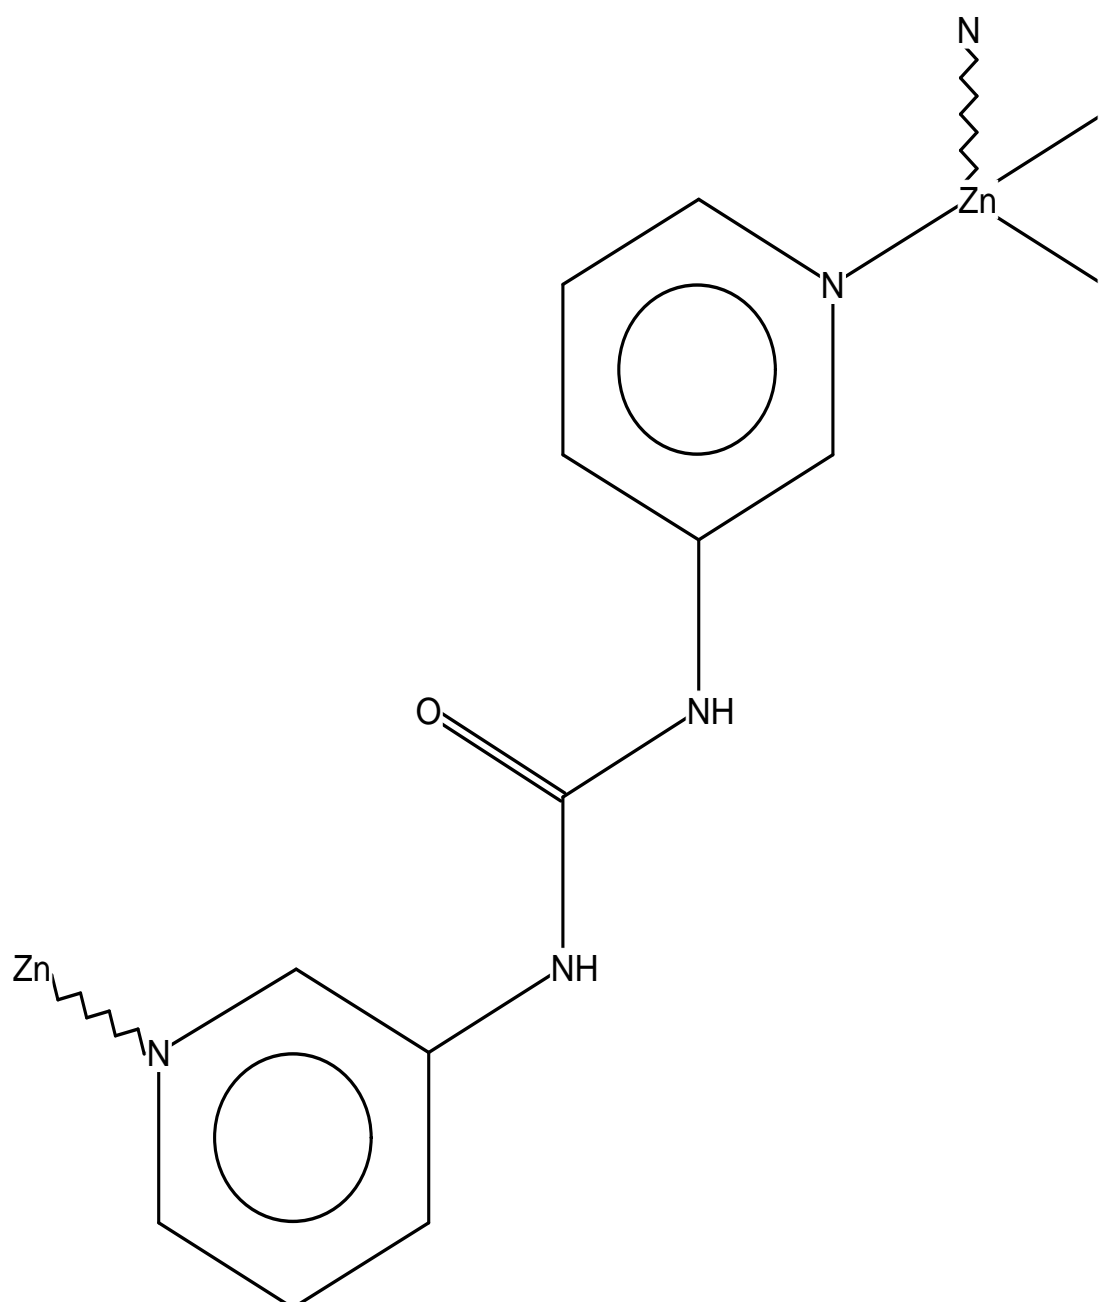

## Search: search2 (Sun Nov 20 19:30:17 2011): Hit 22

### NEMKEW

**Reference:** R.Custelcean, T.H.Haverlock, B.A.Moyer (2006)  
*Inorg.Chem.* ,**45**,6446

**Formula:** (C<sub>11</sub> H<sub>10</sub> Br<sub>1</sub> Cl<sub>1</sub> N<sub>4</sub> O<sub>1</sub> Zn<sub>1</sub>)<sub>n</sub>

**Compound Name:** catena-((μ<sub>2</sub>-N,N'-bis(3-pyridyl)urea)-bromo-chloro-zinc)

**Space Group:** P21/c      **Cell:**      **a** 10.030(1)      **b** 16.765(1)      **c** 8.359(1)  
**Space Group No.:** 14      **(Å, °)**      α 90.00      β 105.10(1)      γ 90.00

**R-Factor (%):** 2.66      **Temperature(K):** 173      **Density(g/cm<sup>3</sup>):** 1.933

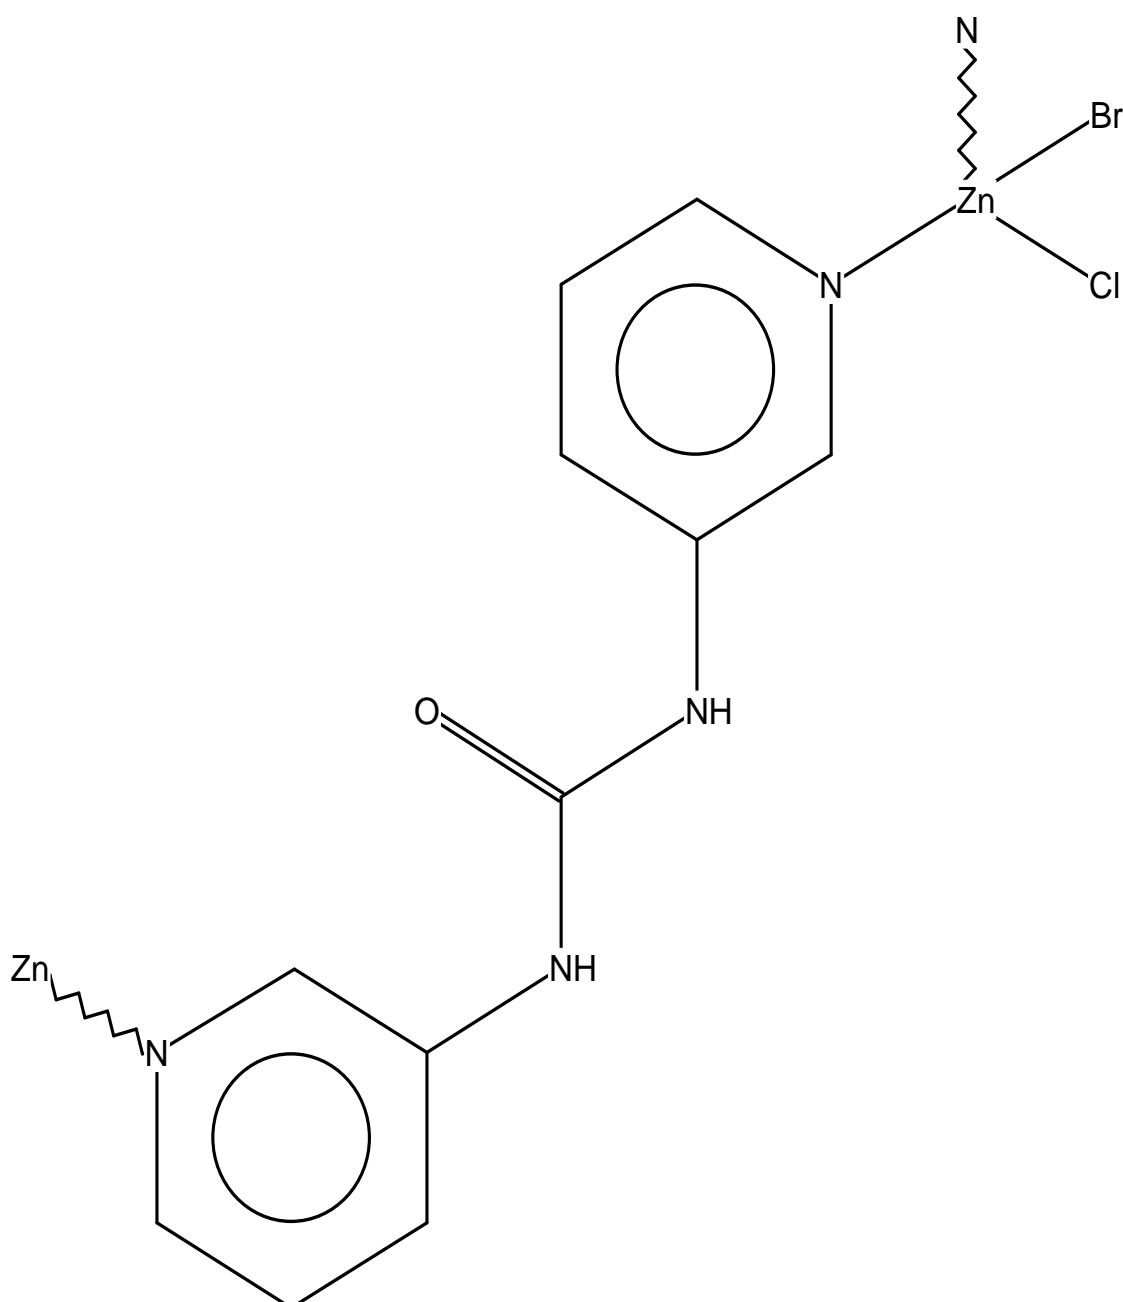

## Search: search2 (Sun Nov 20 19:30:17 2011): Hit 23

### NEMKIA

**Reference:** R.Custelcean, T.H.Haverlock, B.A.Moyer (2006)  
*Inorg.Chem.* ,**45**,6446

**Formula:** (C<sub>11</sub> H<sub>10</sub> Br<sub>1</sub> I<sub>1</sub> N<sub>4</sub> O<sub>1</sub> Zn<sub>1</sub>)<sub>n</sub>

**Compound Name:** catena-((μ<sub>2</sub>-N,N'-bis(3-pyridyl)urea)-bromo-iodo-zinc)

**Space Group:** P21/c      **Cell:**    **a** 10.094(0)    **b** 17.029(1)    **c** 8.585(0)  
**Space Group No.:** 14      **(Å, °)**    **α** 90.00      **β** 104.66(0)    **γ** 90.00

**R-Factor (%):** 2.78      **Temperature(K):** 173      **Density(g/cm<sup>3</sup>):** 2.263

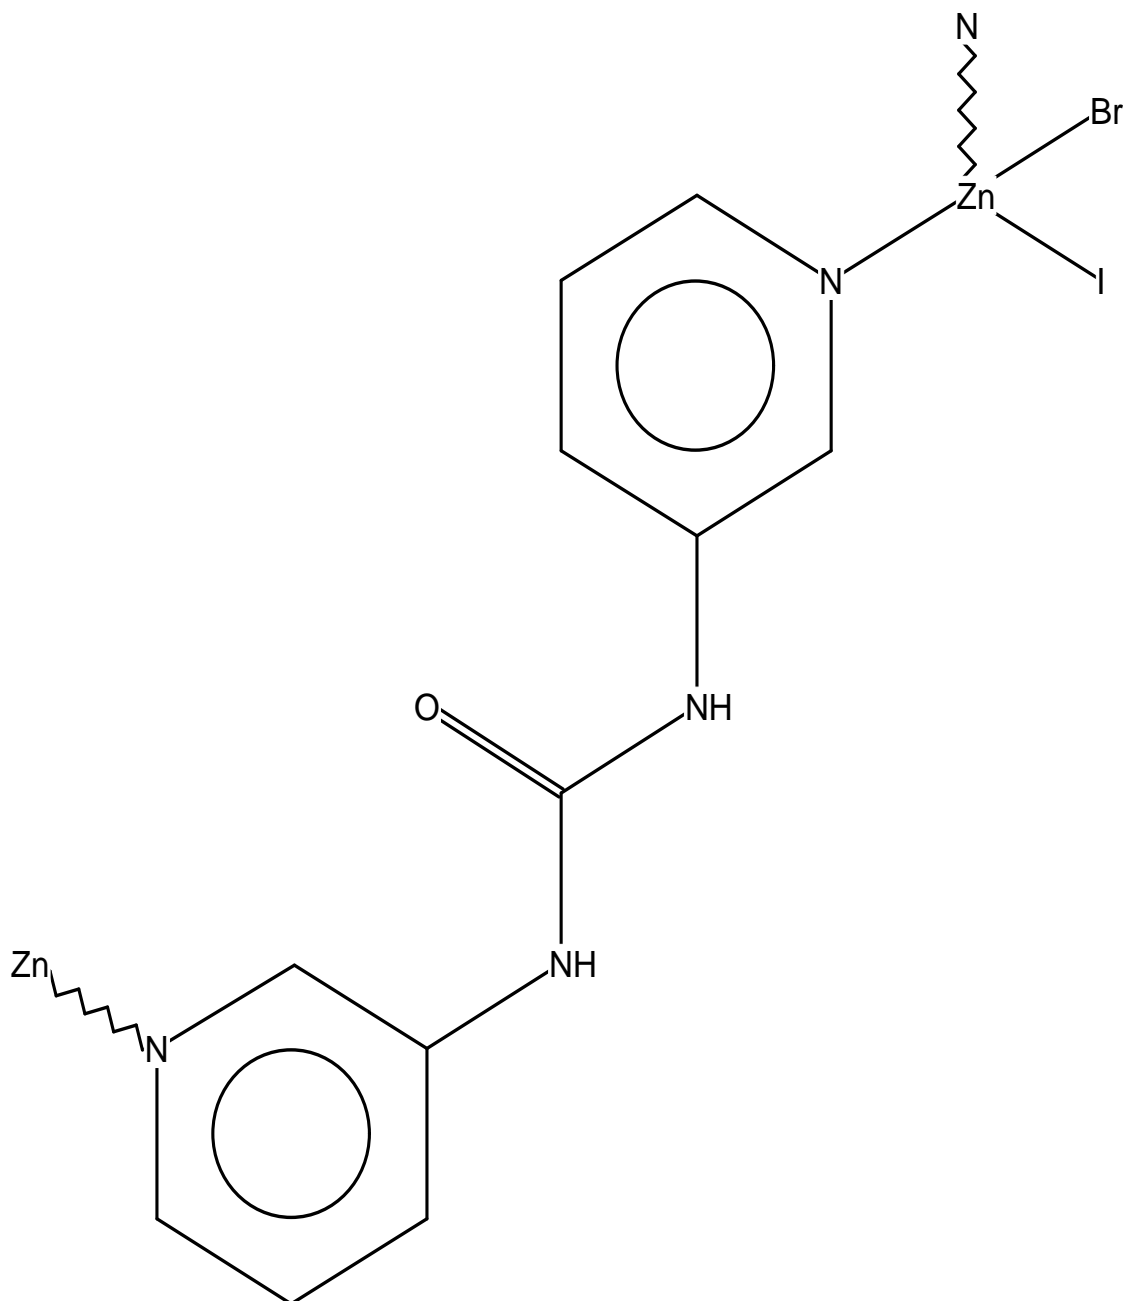

## Search: search2 (Sun Nov 20 19:30:17 2011): Hit 24

### NEMKOG

**Reference:** R.Custelcean, T.H.Haverlock, B.A.Moyer (2006)  
*Inorg.Chem.* ,**45**,6446

**Formula:** (C<sub>11</sub> H<sub>10</sub> Cl<sub>1</sub> I<sub>1</sub> N<sub>4</sub> O<sub>1</sub> Zn<sub>1</sub>)<sub>n</sub>

**Compound Name:** catena-((μ<sub>2</sub>-N,N'-bis(3-pyridyl)urea)-chloro-iodo-zinc)

**Space Group:** P21/c      **Cell:**      **a** 9.997(0)      **b** 17.186(1)      **c** 8.371(0)  
**Space Group No.:** 14      **(Å, °)**      α 90.00      β 105.26(0)      γ 90.00

**R-Factor (%):** 4.49      **Temperature(K):** 173      **Density(g/cm<sup>3</sup>):** 2.116

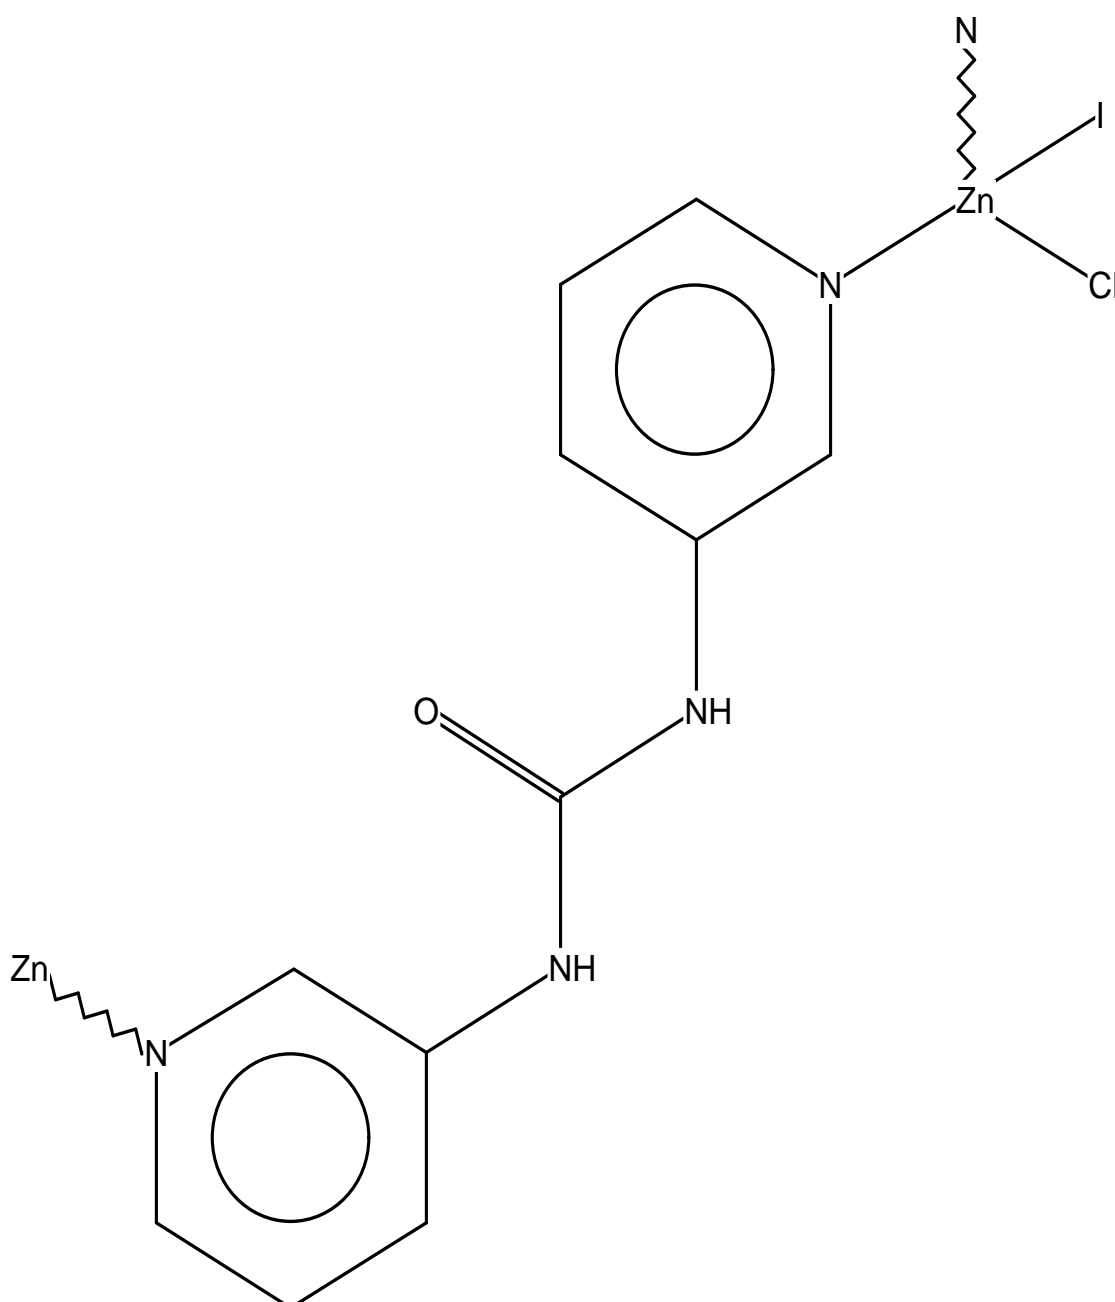

## Search: search2 (Sun Nov 20 19:30:17 2011): Hit 25

### NERNOO

**Reference:** R.Custelcean, T.H.Haverlock, B.A.Moyer (2006)  
*Inorg.Chem.* ,**45**,6446

**Formula:** (C<sub>11</sub> H<sub>10</sub> Cl<sub>2</sub> N<sub>4</sub> O<sub>1</sub> Zn<sub>1</sub>)<sub>n</sub>

**Compound Name:** catena-((μ<sub>2</sub>-N,N'-bis(3-pyridyl)urea)-dichloro-zinc)

**Space Group:** Fdd2      **Cell:**      **a** 18.367(1)      **b** 9.878(0)      **c** 15.937(1)  
**Space Group No.:** 43      **(Å, °)**      **α** 90.00      **β** 90.00      **γ** 90.00

**R-Factor (%):** 1.55      **Temperature(K):** 173      **Density(g/cm<sup>3</sup>):** 1.610

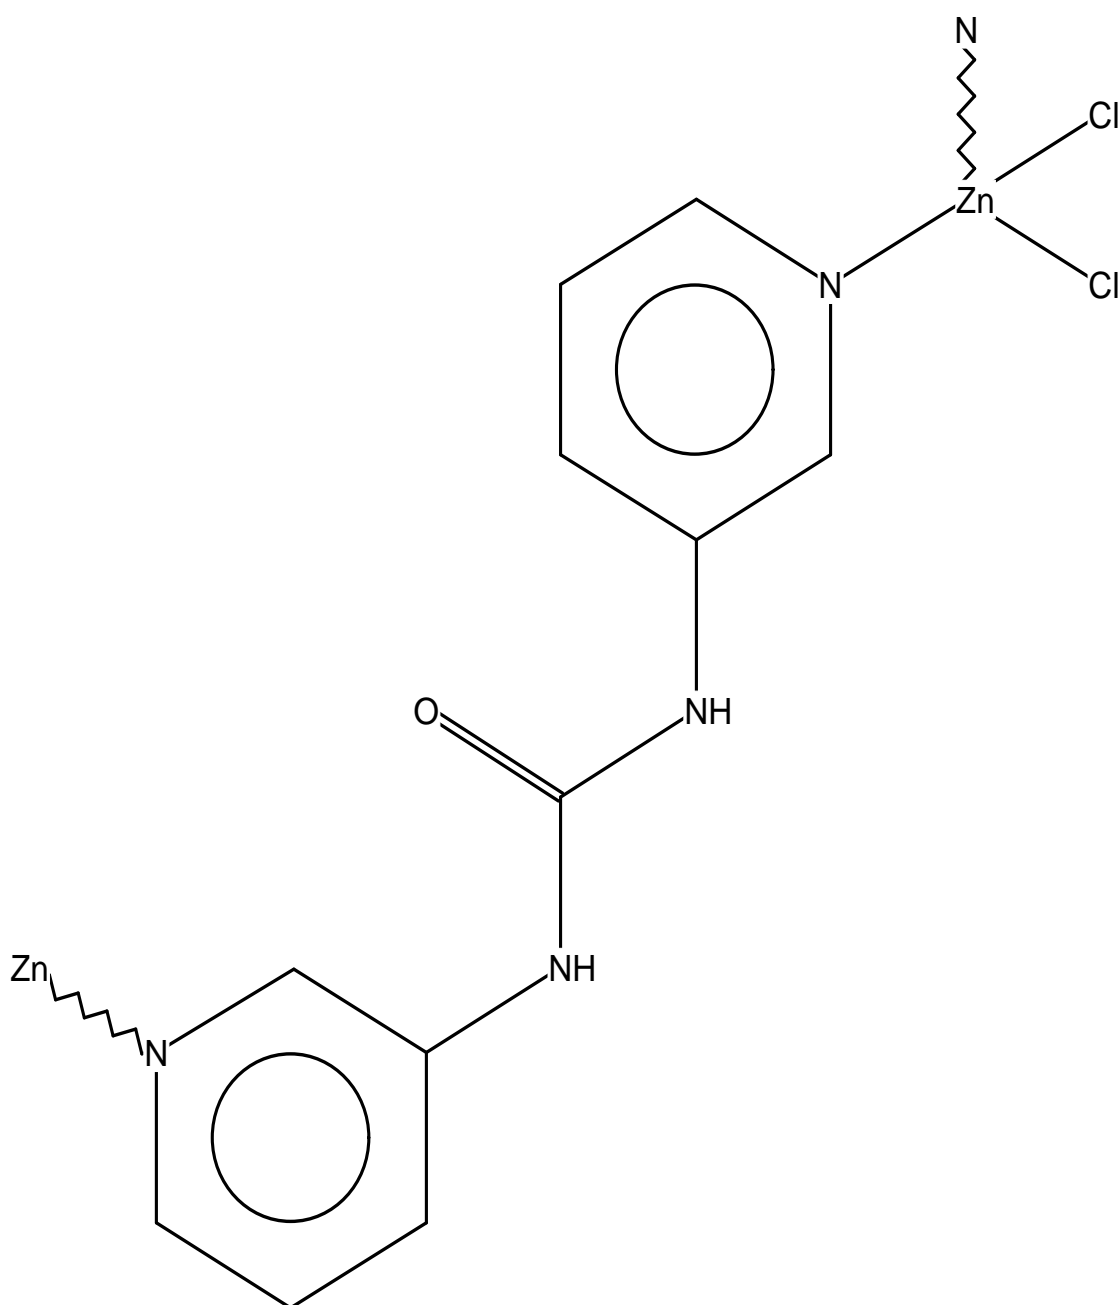



## Search: search2 (Sun Nov 20 19:30:17 2011): Hit 26

### PEFGUD

**Reference:** R.Custelcean, B.A.Moyer, V.S.Bryantsev, B.P.Hay (2006)  
*Cryst.Growth Des.* ,6,555

**Formula:** (C<sub>11</sub> H<sub>16</sub> N<sub>4</sub> O<sub>8</sub> S<sub>1</sub> Zn<sub>1</sub>)<sub>n</sub>,n(C<sub>2</sub> H<sub>6</sub> O<sub>1</sub>)

**Compound Name:** catena-((μ<sub>2</sub>-N,N'-bis(3-Pyridyl)urea)-trihydrato-(sulfato-O)-zinc ethanol solvate)

**Space Group:** P21/n      **Cell:**      **a** 7.743(1)      **b** 11.068(1)      **c** 21.559(3)  
**Space Group No.:** 14      **(Å, °)**      **α** 90.00      **β** 96.91(0)      **γ** 90.00

**R-Factor (%):** 4.86      **Temperature(K):** 173      **Density(g/cm<sup>3</sup>):** 1.723

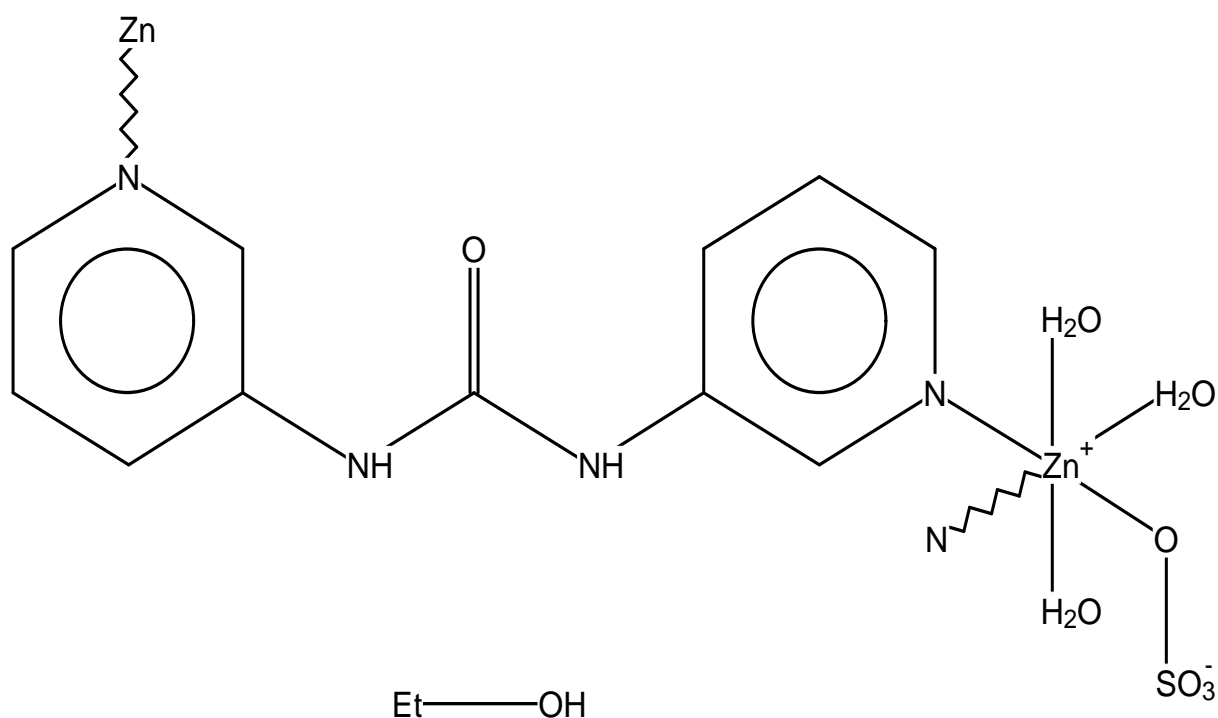

## Search: search2 (Sun Nov 20 19:30:17 2011): Hit 27

### PEFHAK

**Reference:** R.Custelcean, B.A.Moyer, V.S.Bryantsev, B.P.Hay (2006)  
*Cryst.Growth Des.* ,6,555

**Formula:**  $(C_{22} H_{30} N_8 O_{15} S_2 Zn_2)_n \cdot 7n(H_2 O)_1$

**Compound Name:** catena-(bis( $\mu_2$ -N,N'-bis(3-Pyridyl)urea-N,N')-penta-aqua-bis(sulfato-O)-di-zinc heptahydrate)

**Space Group:** P2/c      **Cell:**    **a** 8.489(1)    **b** 10.584(1)    **c** 20.733(4)  
**Space Group No.:** 13      **(Å, °)**     $\alpha$  90.00       $\beta$  96.62(0)     $\gamma$  90.00

**R-Factor (%):** 3.81      **Temperature(K):** 173      **Density(g/cm<sup>3</sup>):** 1.737

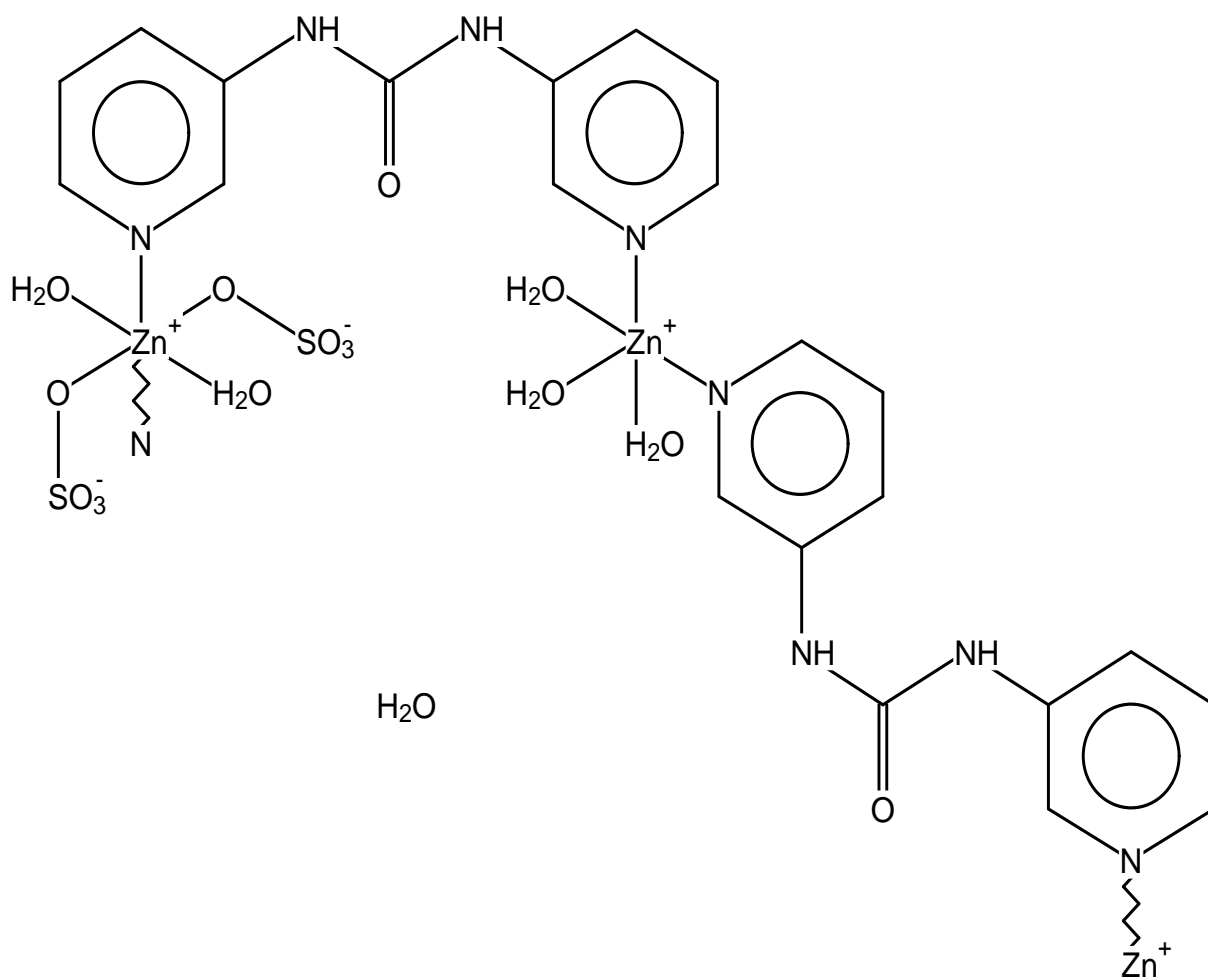

## Search: search2 (Sun Nov 20 19:30:17 2011): Hit 28

### PEFHEO

**Reference:** R.Custelcean, B.A.Moyer, V.S.Bryantsev, B.P.Hay (2006)  
*Cryst.Growth Des.* ,6,555

**Formula:**  $(C_{22} H_{20} Cu_1 N_9 O_5^{1+})_n, n(N_1 O_3^{1-}), 0.5n(C_1 H_4 O_1), 2.5n(H_2 O_1)$

**Compound Name:** catena-(bis( $\mu_2$ -N,N'-bis(3-Pyridyl)urea)-( $\mu_2$ -nitrate-O,O')-copper(i) nitrate methanol solvate hydrate)

**Space Group:** P21/c      **Cell:**      **a** 6.722(0)      **b** 26.649(4)      **c** 17.515(2)  
**Space Group No.:** 14      **(Å, °)**       $\alpha$  90.00       $\beta$  92.45(0)       $\gamma$  90.00

**R-Factor (%):** 6.79      **Temperature(K):** 173      **Density(g/cm<sup>3</sup>):** 1.435

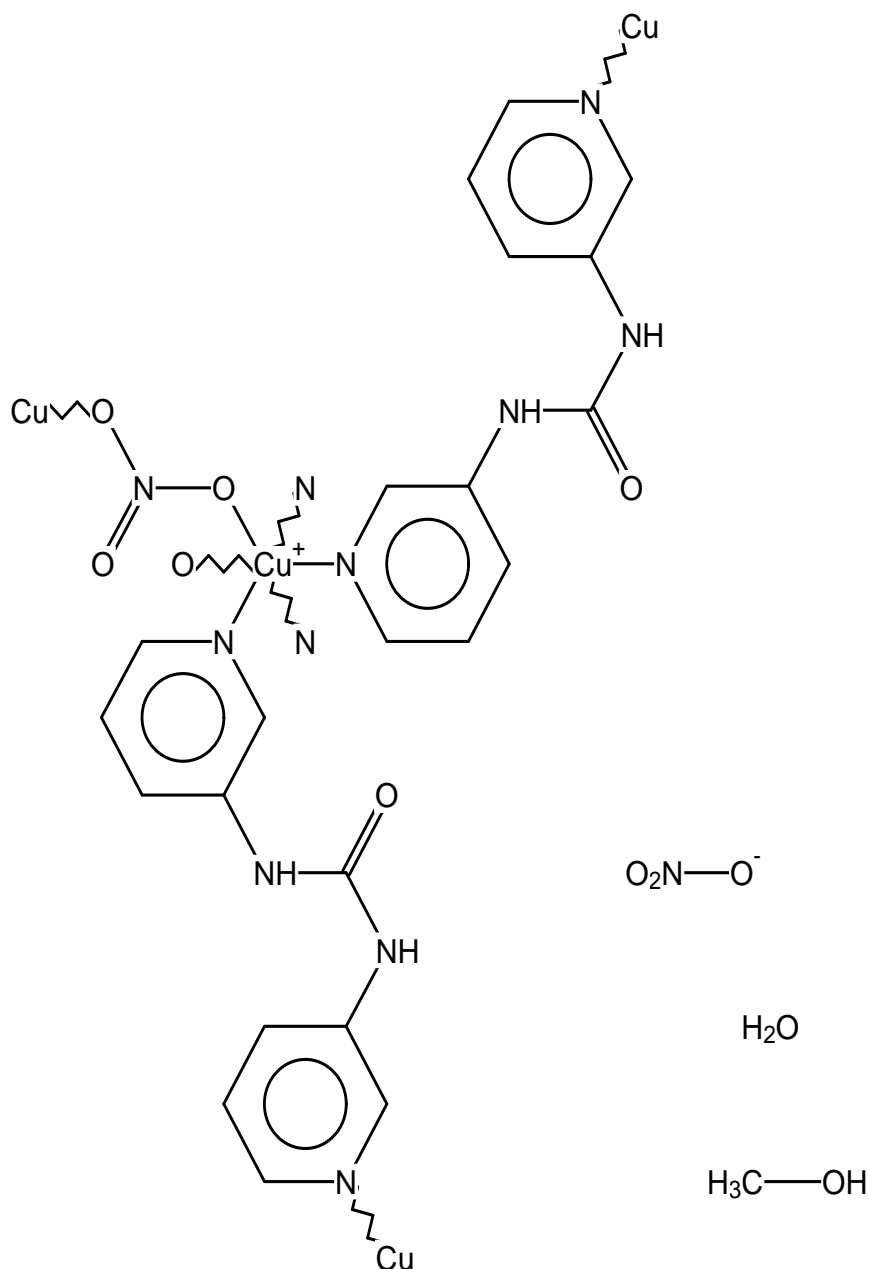

## Search: search2 (Sun Nov 20 19:30:17 2011): Hit 29

### PEFHIS

**Reference:** R.Custelcean, B.A.Moyer, V.S.Bryantsev, B.P.Hay (2006)  
*Cryst.Growth Des.* ,6,555

**Formula:**  $(C_{22} H_{22} Cu_1 N_8 O_3^{2+})_n, 2n(C_1 F_3 O_3 S_1^{-1}), n(H_2 O_1)$

**Compound Name:** catena-(bis( $\mu_2$ -N,N'-bis(3-Pyridyl)urea-N,N')-aqua-copper(i)  
bis(trifluoromethanesulfonate) monohydrate)

**Space Group:** P21/c      **Cell:**      **a** 9.124(0)      **b** 18.127(1)      **c** 19.586(2)  
**Space Group No.:** 14      **(Å, °)**       $\alpha$  90.00       $\beta$  94.71(0)       $\gamma$  90.00

**R-Factor (%):** 4.50      **Temperature(K):** 173      **Density(g/cm<sup>3</sup>):** 1.700

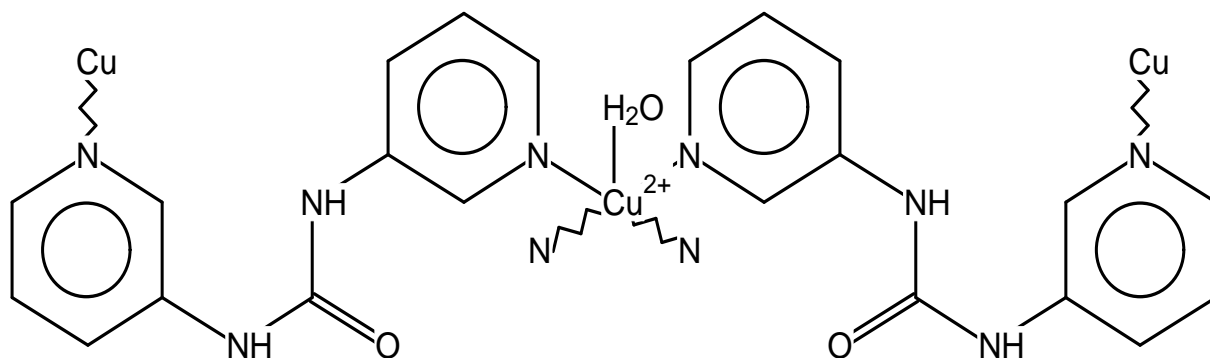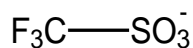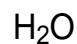

## Search: search2 (Sun Nov 20 19:30:17 2011): Hit 30

PEFHIS01

**Reference:** D.K.Kumar, A.Das, P.Dastidar (2006) *New J.Chem.* ,**30**, 1267

**Formula:**  $(C_{22}H_{22}Cu_1N_8O_3^{2+})_n, 2n(C_1F_3O_3S_1^{-1}), n(H_2O_1)$

**Compound Name:** catena-(bis( $\mu_2$ -N,N'-bis(3-Pyridyl)urea)-aqua-copper(ii) bis(trifluoromethanesulfonate) monohydrate)

**Space Group:** P21/c      **Cell:**      **a** 9.052(0)      **b** 18.099(1)      **c** 19.554(1)  
**Space Group No.:** 14      **(Å, °)**       $\alpha$  90.00       $\beta$  95.29(0)       $\gamma$  90.00

**R-Factor (%):** 4.27      **Temperature(K):** 100      **Density(g/cm<sup>3</sup>):** 1.720

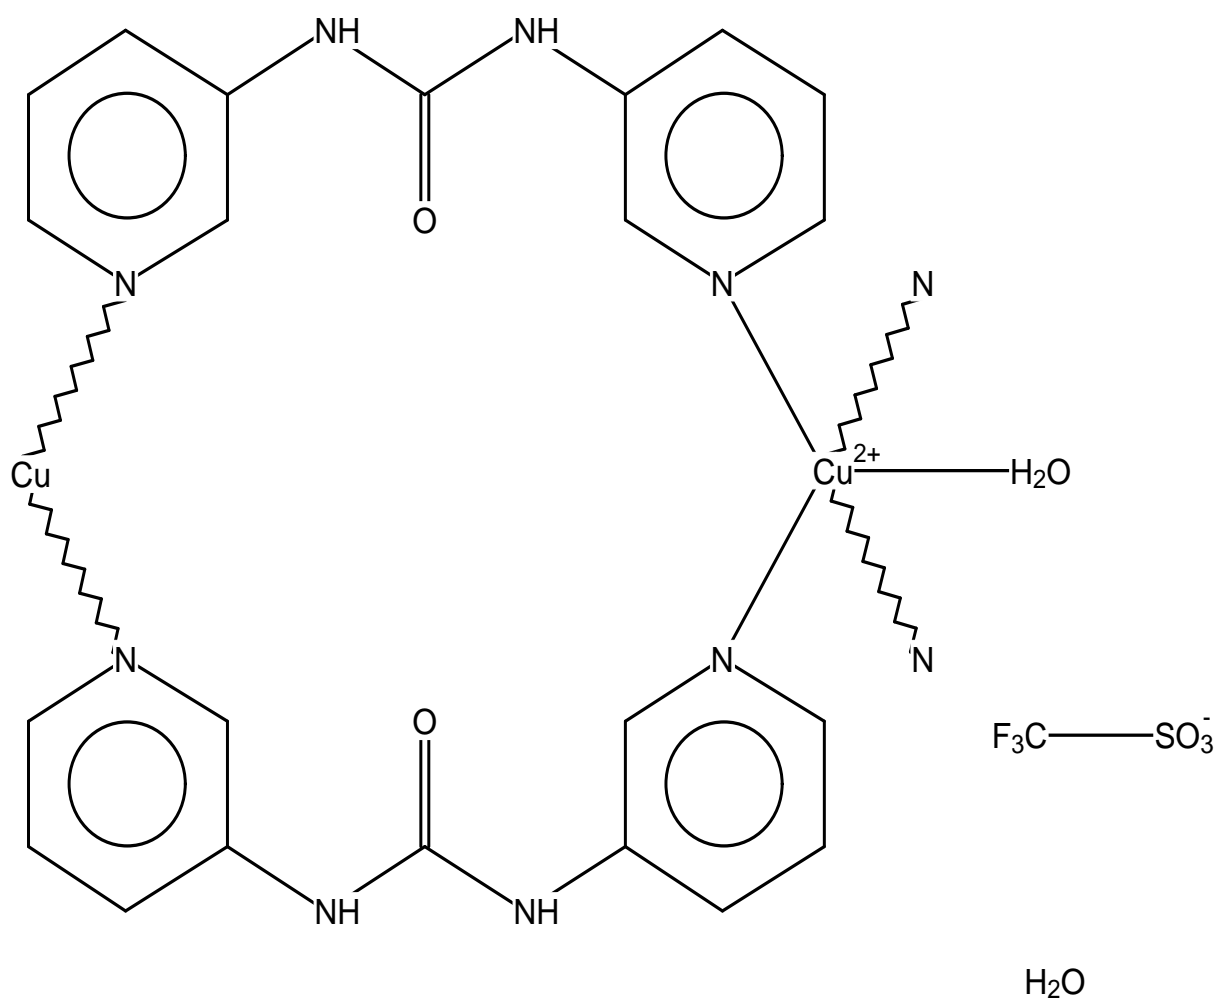

## Search: search2 (Sun Nov 20 19:30:17 2011): Hit 31

### PEFH0Y

**Reference:** R.Custelcean, B.A.Moyer, V.S.Bryantsev, B.P.Hay (2006)  
*Cryst.Growth Des.* ,6,555

**Formula:**  $C_{22} H_{28} N_8 O_6 Zn_1^{2+}, 2(Cl_1 O_4^{1-}), 2(C_{11} H_{10} N_4 O_1)$

**Compound Name:** Tetra-aqua-bis(N,N'-bis(3-pyridyl)urea-N)-zinc diperchlorate N,N'-bis(3-pyridyl)urea solvate

**Space Group:** C2/c      **Cell:**    **a** 23.905(5)    **b** 13.712(3)    **c** 15.538(3)  
**Space Group No.:** 15      **(Å, °)**     $\alpha$  90.00       $\beta$  99.54(0)     $\gamma$  90.00

**R-Factor (%):** 4.61      **Temperature(K):** 173      **Density(g/cm<sup>3</sup>):** 1.578

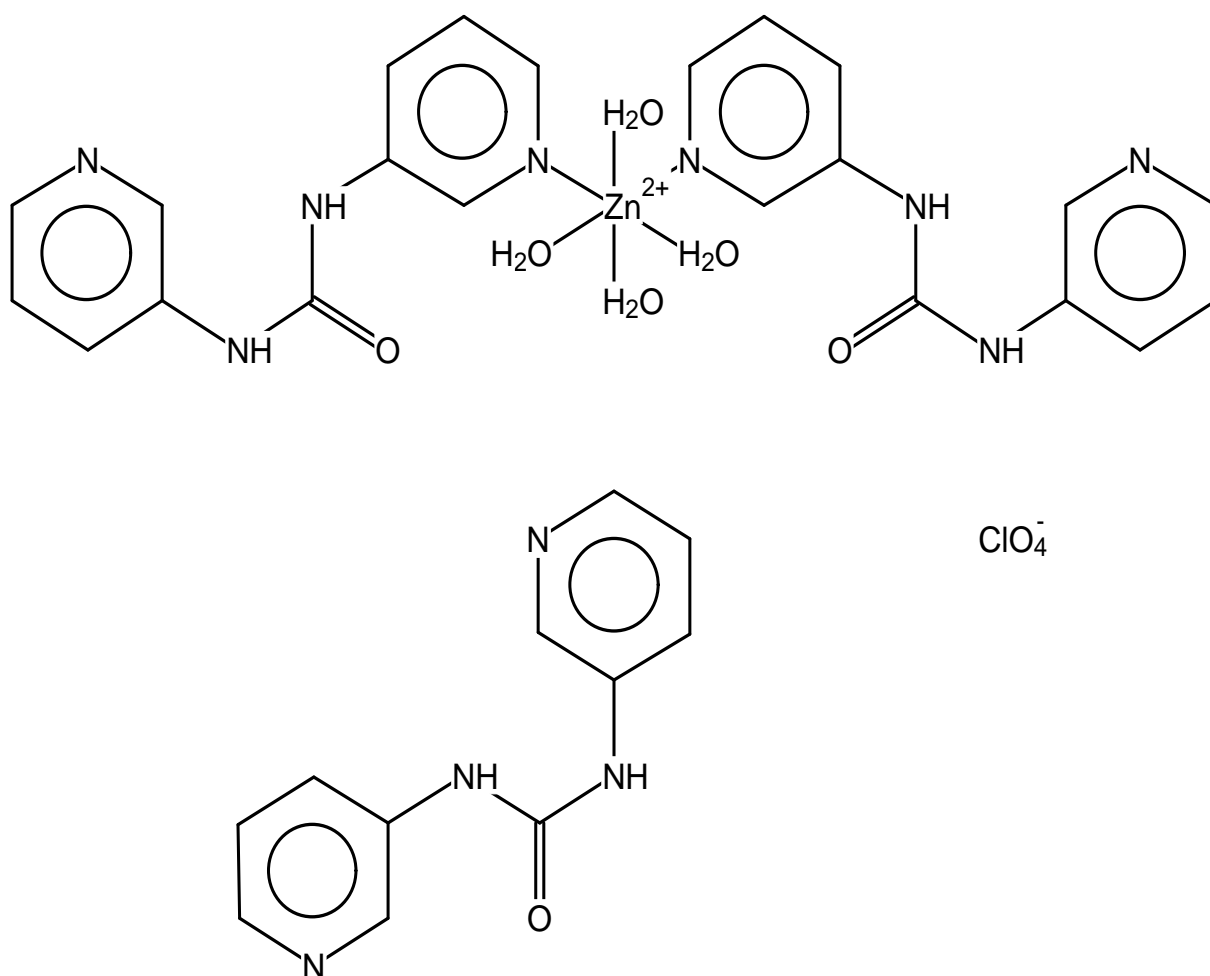

## Search: search2 (Sun Nov 20 19:30:17 2011): Hit 32

### SEQHAY

**Reference:** D.K.Kumar, A.Das, P.Dastidar (2006) *CrystEngComm*, **8**, 805

**Formula:** (C<sub>15</sub> H<sub>16</sub> N<sub>4</sub> O<sub>5</sub> Zn<sub>1</sub>)<sub>n</sub>,n(C<sub>1</sub> H<sub>1</sub> Cl<sub>3</sub>)

**Compound Name:** catena-((μ<sub>2</sub>-N,N'-bis(3-Pyridyl)urea)-(acetato-O)-(acetato-O,O')-zinc(ii) chloroform solvate)

**Space Group:** P21/c      **Cell:**      **a** 9.213(1)      **b** 12.441(2)      **c** 19.292(3)  
**Space Group No.:** 14      **(Å, °)**      **α** 90.00      **β** 95.45(0)      **γ** 90.00

**R-Factor (%):** 6.86      **Temperature(K):** 100      **Density(g/cm<sup>3</sup>):** 1.560

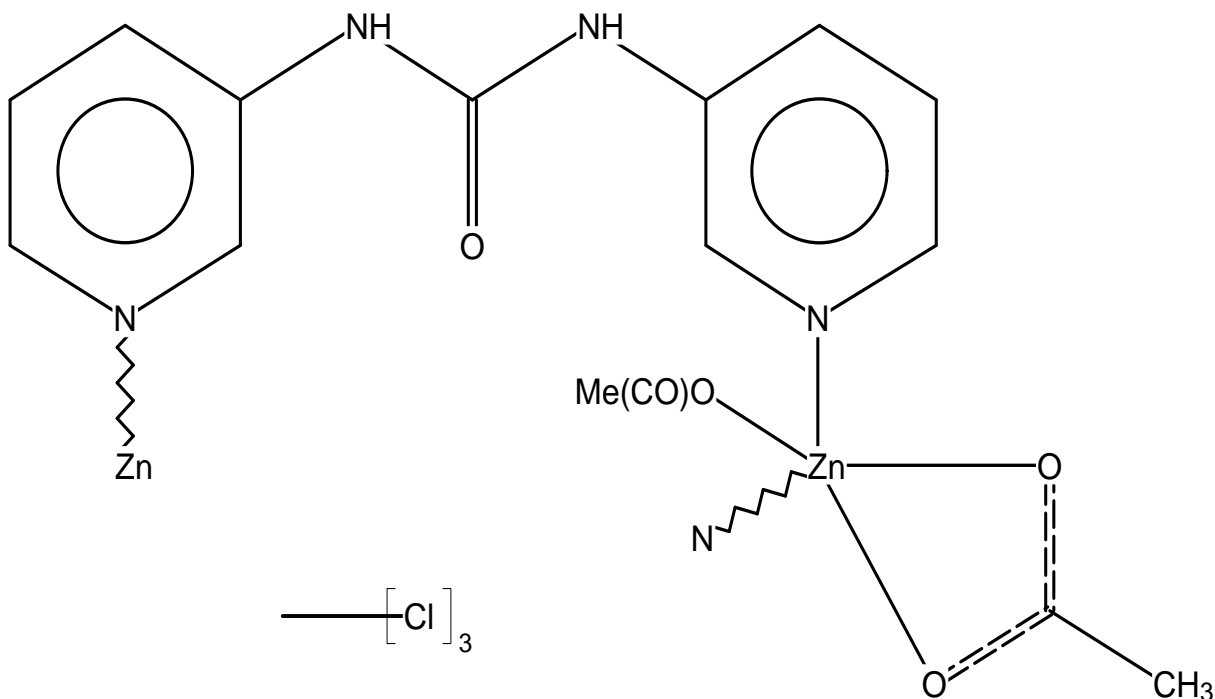

## Search: search2 (Sun Nov 20 19:30:17 2011): Hit 33

### SETKIM

**Reference:** D.K.Kumar, A.Das, P.Dastidar (2006) *CrystEngComm*, **8**, 805

**Formula:** (C<sub>11</sub> H<sub>16</sub> N<sub>4</sub> O<sub>8</sub> S<sub>1</sub> Zn<sub>1</sub>)<sub>n</sub>,n(C<sub>1</sub> H<sub>4</sub> O<sub>1</sub>)

**Compound Name:** catena-((μ<sub>2</sub>-N,N'-bis(3-Pyridyl)urea)-(sulfato-O)-triaqua-zinc(ii) methanol solvate)

**Space Group:** P21/n      **Cell:**      **a** 7.736(1)      **b** 10.898(1)      **c** 21.528(4)  
**Space Group No.:** 14      **(Å, °)**      **α** 90.00      **β** 96.73(0)      **γ** 90.00

**R-Factor (%):** 5.68      **Temperature(K):** 298      **Density(g/cm<sup>3</sup>):** 1.702

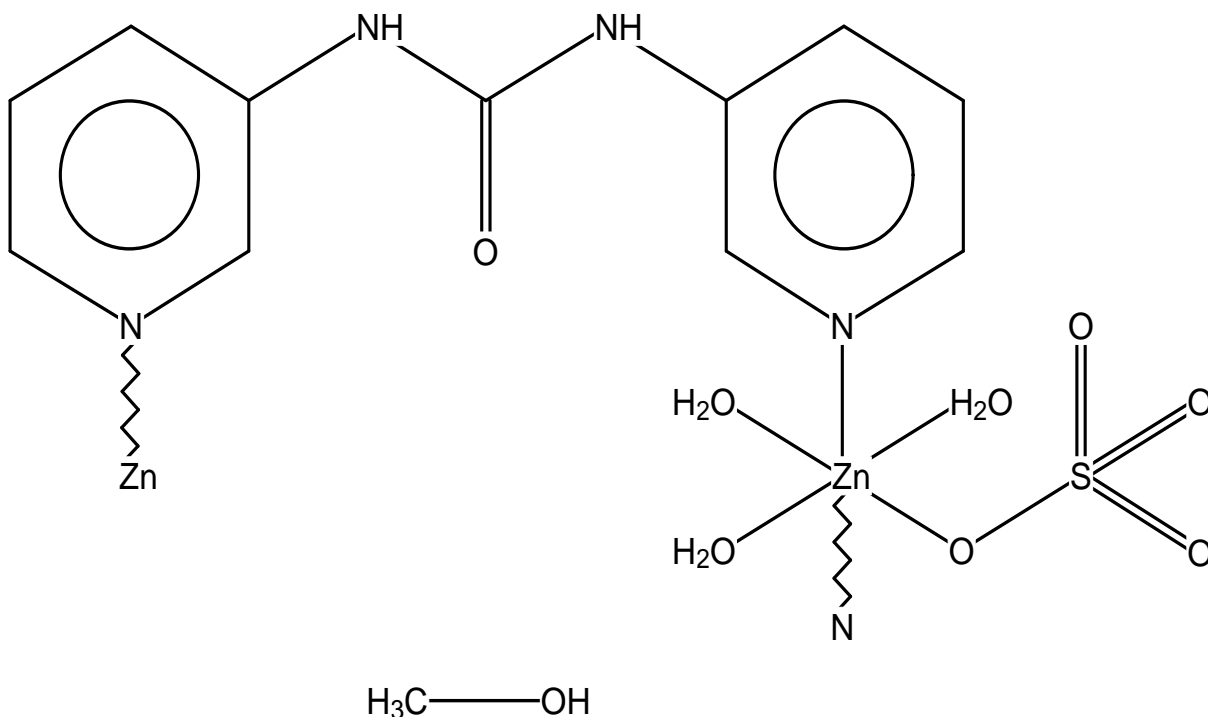



## Search: search2 (Sun Nov 20 19:30:17 2011): Hit 34

### VIMZEX

**Reference:** D.K.Kumar, A.Das, P.Dastidar (2007) *Inorg.Chem.* ,**46**, 7351

**Formula:**  $C_{99} H_{66} N_{12} O_1 Zn_2 \cdot 4(C_6 H_5 Br)_1, H_2 O_1$

**Compound Name:** ( $\mu_2$ -N,N'-bis(3-Pyridyl)urea)-bis(5,10,15,20-tetraphenylporphyrinato)-di-zinc(ii) tetrakis(bromobenzene) clathrate monohydrate

**Space Group:** C2      **Cell:**    **a** 18.541(1)    **b** 11.909(1)    **c** 23.836(2)  
**Space Group No.:** 5      **(Å, °)**     $\alpha$  90.00       $\beta$  110.05(0)     $\gamma$  90.00

**R-Factor (%):** 3.78      **Temperature(K):** 100      **Density(g/cm<sup>3</sup>):** 1.489

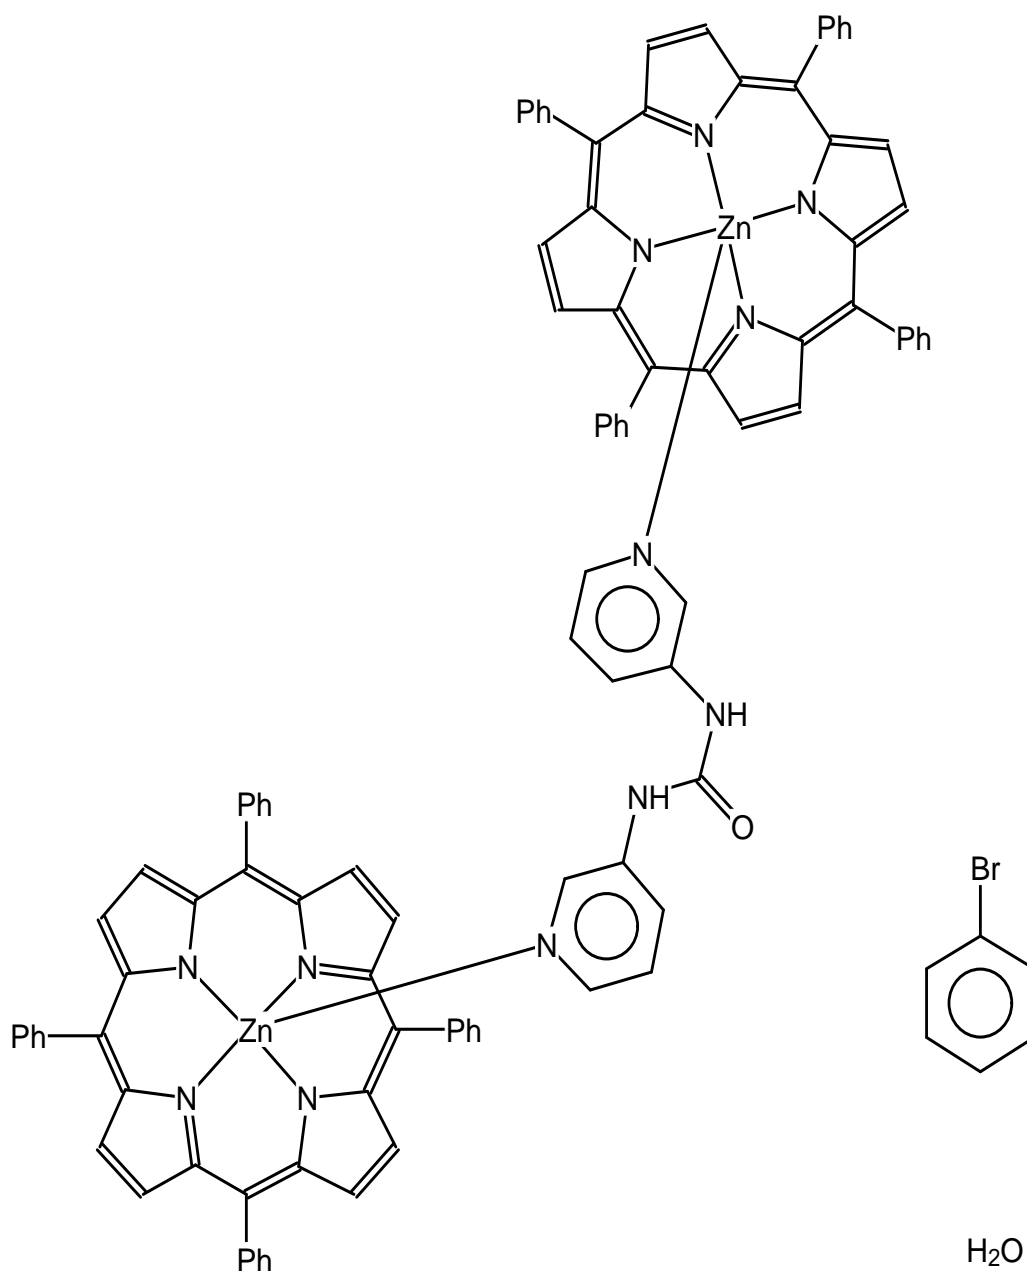

## Search: search2 (Sun Nov 20 19:30:17 2011): Hit 35

### VIMZIB

**Reference:** D.K.Kumar, A.Das, P.Dastidar (2007) *Inorg.Chem.* ,**46**, 7351

**Formula:** C<sub>99</sub> H<sub>66</sub> N<sub>12</sub> O<sub>1</sub> Zn<sub>2</sub>,4(C<sub>7</sub> H<sub>8</sub>),H<sub>2</sub> O<sub>1</sub>

**Compound Name:** ( $\mu_2$ -N,N'-bis(3-Pyridyl)urea)-bis(5,10,15,20-tetraphenylporphyrinato)-di-zinc(ii) tetrakis(toluene) monohydrate clathrate

**Space Group:** C2      **Cell:**    **a** 18.528(1)    **b** 11.884(0)    **c** 23.815(1)  
**Space Group No.:** 5      **(Å, °)**     $\alpha$  90.00       $\beta$  109.56(0)     $\gamma$  90.00

**R-Factor (%):** 3.51      **Temperature(K):** 100      **Density(g/cm<sup>3</sup>):** 1.315

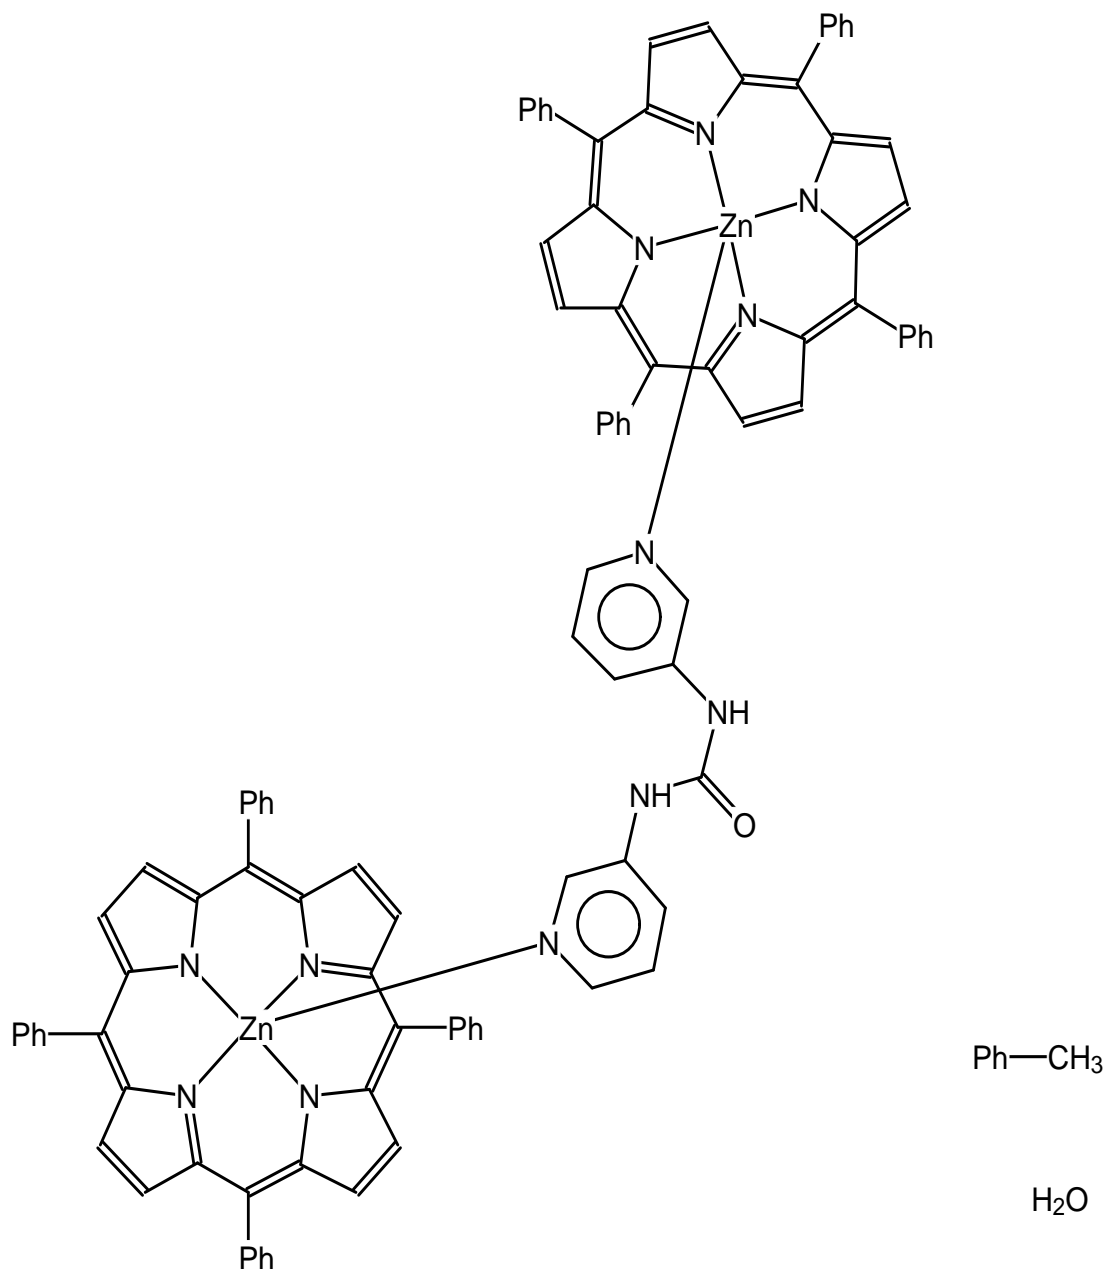

## Search: search2 (Sun Nov 20 19:30:17 2011): Hit 36

### VINBAW

**Reference:** D.K.Kumar, A.Das, P.Dastidar (2007) *Inorg.Chem.* ,**46**, 7351

**Formula:**  $(C_{110} H_{76} Mn_2 N_{16} O_2^{2+})_n, 2n(Cl_1^{-1-}), 4n(C_6 H_5 N_1 O_2), 4n(H_2 O_1)$

**Compound Name:** catena-(bis( $\mu_2$ -N,N'-bis(3-Pyridyl)urea)-bis(5,10,15,20-tetraphenylporphyrinato)-di-manganese(ii) dichloride tetrakis(nitrobenzene) dihydrate clathrate dihydrate)

|                         |      |                        |                    |                                   |                    |
|-------------------------|------|------------------------|--------------------|-----------------------------------|--------------------|
| <b>Space Group:</b>     | P-1  | <b>Cell:</b>           | <b>a</b> 12.920(1) | <b>b</b> 13.906(1)                | <b>c</b> 16.053(1) |
| <b>Space Group No.:</b> | 2    | <b>(Å, °)</b>          | $\alpha$ 93.85(0)  | $\beta$ 94.52(0)                  | $\gamma$ 96.53(0)  |
| <b>R-Factor (%):</b>    | 9.64 | <b>Temperature(K):</b> | 100                | <b>Density(g/cm<sup>3</sup>):</b> | 1.399              |

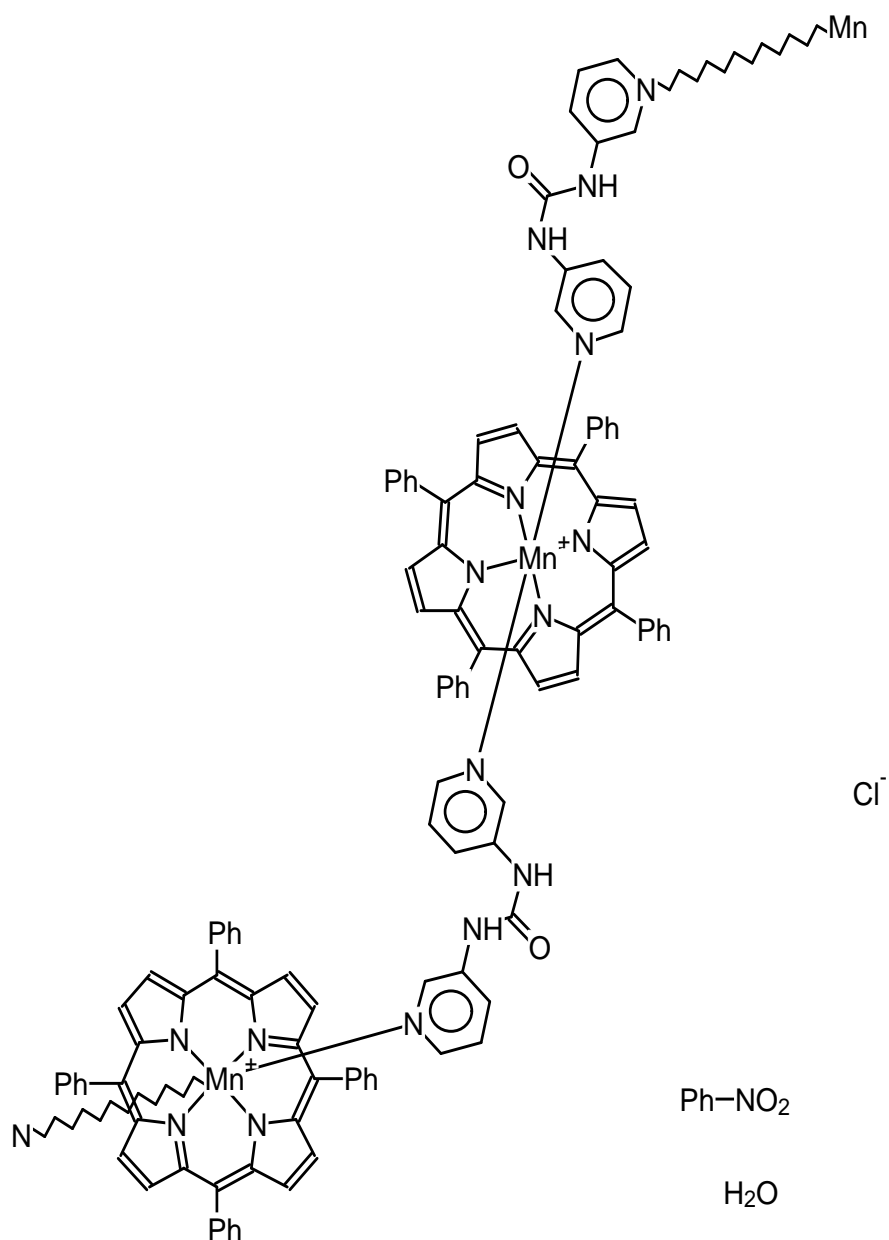

## Search: search2 (Sun Nov 20 19:30:17 2011): Hit 37

### VINBEA

**Reference:** D.K.Kumar, A.Das, P.Dastidar (2007) *Inorg.Chem.* ,**46**, 7351

**Formula:**  $C_{66} H_{48} Mn_1 N_{12} O_2^{1+}, Cl_1^{1-}, C_7 H_8, C_1 H_1 Cl_3$

**Compound Name:** bis(N,N'-bis(3-Pyridyl)urea)-(5,10,15,20-tetraphenylporphyrinato)-manganese(ii) chloride toluene chloroform clathrate

**Space Group:** P-1      **Cell:**      **a** 12.915(1)      **b** 15.739(2)      **c** 17.626(2)  
**Space Group No.:** 2      **(Å, °)**       $\alpha$  92.63(0)       $\beta$  110.36(0)       $\gamma$  105.79(0)

**R-Factor (%):** 6.86      **Temperature(K):** 150      **Density(g/cm<sup>3</sup>):** 1.397

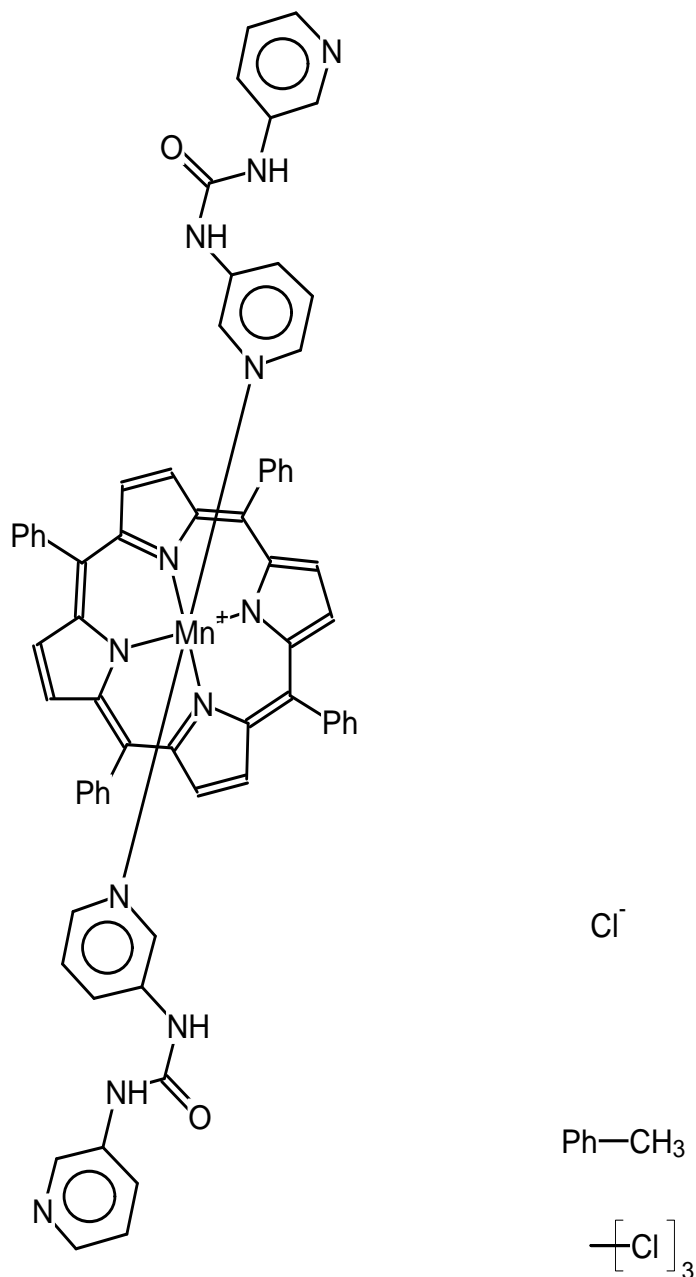

## Search: search2 (Sun Nov 20 19:30:17 2011): Hit 38

VINBIE

**Reference:** D.K.Kumar, A.Das, P.Dastidar (2007) *Inorg.Chem.* ,**46**, 7351

**Formula:**  $C_{66} H_{48} Mn_1 N_{12} O_2^{1+}, Cl_1^{1-}, 1.5(C_8 H_{10}), H_2 O_1$

**Compound Name:** bis(N,N'-bis(3-Pyridyl)urea)-(5,10,15,20-tetraphenylporphyrinato)-manganese(ii) chloride sesquikis(p-xylene) monohydrate clathrate

**Space Group:** P-1      **Cell:**    **a** 12.873(1)    **b** 13.071(1)    **c** 20.029(1)  
**Space Group No.:** 2      **(Å, °)**     $\alpha$  82.51(0)     $\beta$  84.05(0)     $\gamma$  78.27(0)

**R-Factor (%):** 5.75      **Temperature(K):** 100      **Density(g/cm<sup>3</sup>):** 1.333

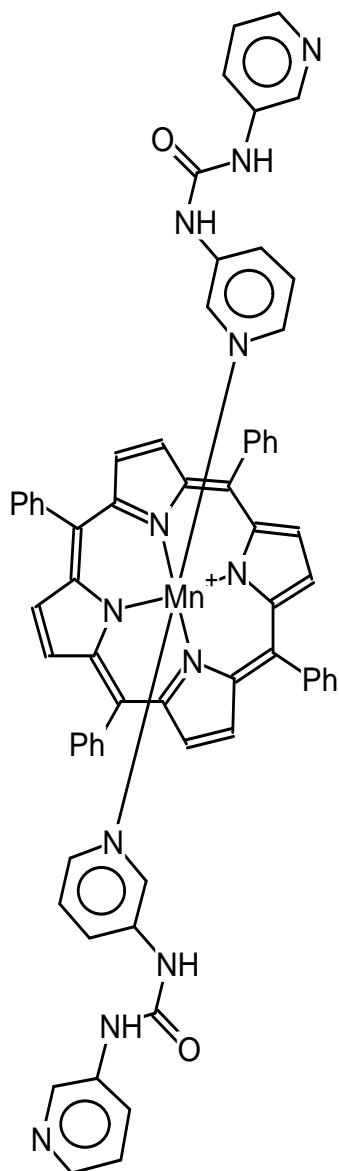

Cl<sup>-</sup>

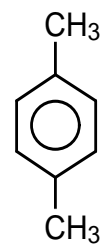

H<sub>2</sub>O

## Search Overview

**Search:** search3  
**Date/Time done:** Sun Nov 20 19:32:00 2011  
**Database(s):** CSD version 5.32 (November 2010)  
CSD version 5.32 updates (Nov 2010)  
**Restriction Info:** No refcode restrictions applied  
**Filters:** None  
**Percentage Completed:** 100%  
**Number of Hits:** 10

*Summary of queries used. Search found structures that:*

match

**Query 1**

**Query 2**

**Query 1**

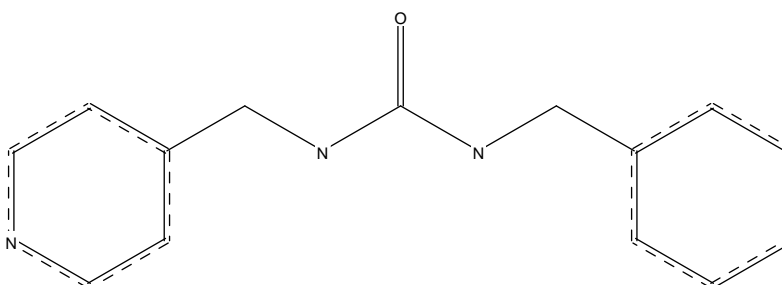

**Query 2**

4M

## Search: search3 (Sun Nov 20 19:32:00 2011): Hit 1

HEYDEV

**Reference:** Biing-Chiau Tzeng, Yung-Chi Huang, Bo-So Chen, Wan-Min Wu, Shih-Yang Lee, Gene-Hsiang Lee, Shie-Ming Peng (2007) *Inorg.Chem.* ,**46**,186

**Formula:** (C<sub>13</sub> H<sub>14</sub> Cl<sub>2</sub> Hg<sub>1</sub> N<sub>4</sub> O<sub>1</sub>)<sub>n</sub>

**Compound Name:** catena-((μ<sub>2</sub>-1,3-bis(4-Pyridylmethyl)urea)-dichloro-mercury(ii))

**Space Group:** P2/n      **Cell:**    **a** 14.609(1)    **b** 4.471(0)    **c** 15.142(1)  
**Space Group No.:** 13      **(Å, °)**    **α** 90.00      **β** 106.78(0)    **γ** 90.00

**R-Factor (%):** 4.63      **Temperature(K):** 273      **Density(g/cm<sup>3</sup>):** 1.802

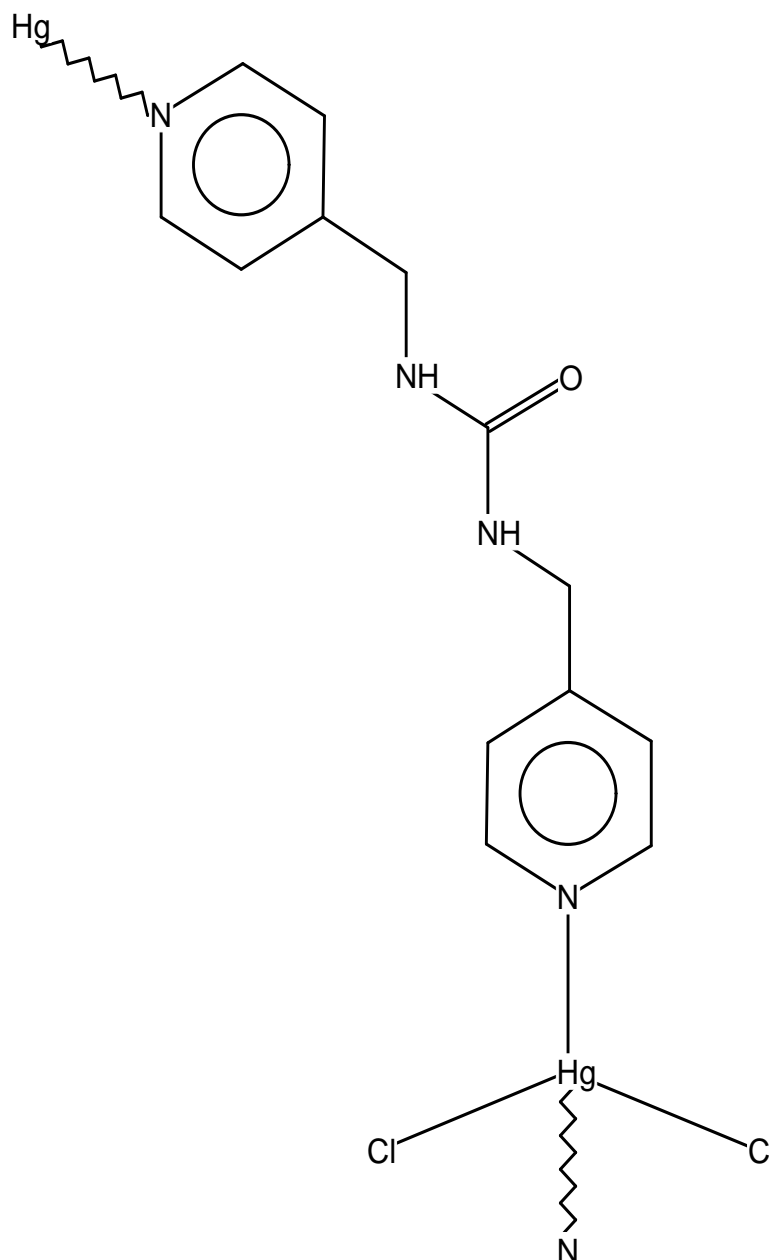

## Search: search3 (Sun Nov 20 19:32:00 2011): Hit 2

### HEYDUL

**Reference:** Biing-Chiau Tzeng, Yung-Chi Huang, Bo-So Chen, Wan-Min Wu, Shih-Yang Lee, Gene-Hsiang Lee, Shie-Ming Peng (2007) *Inorg.Chem.* ,**46**,186

**Formula:** (C<sub>17</sub> H<sub>20</sub> Cd<sub>1</sub> N<sub>4</sub> O<sub>5</sub>)<sub>n</sub>

**Compound Name:** catena-((μ<sub>3</sub>-1,3-bis(4-Pyridylmethyl)urea)-bis(acetato)-cadmium(ii))

**Space Group:** Pn                      **Cell:**     **a** 9.393(1)     **b** 8.962(1)     **c** 11.080(2)  
**Space Group No.:** 7                      **(Å, °)**     α 90.00                      β 95.57(0)                      γ 90.00

**R-Factor (%):** 3.01                      **Temperature(K):** 273                      **Density(g/cm<sup>3</sup>):** 1.691

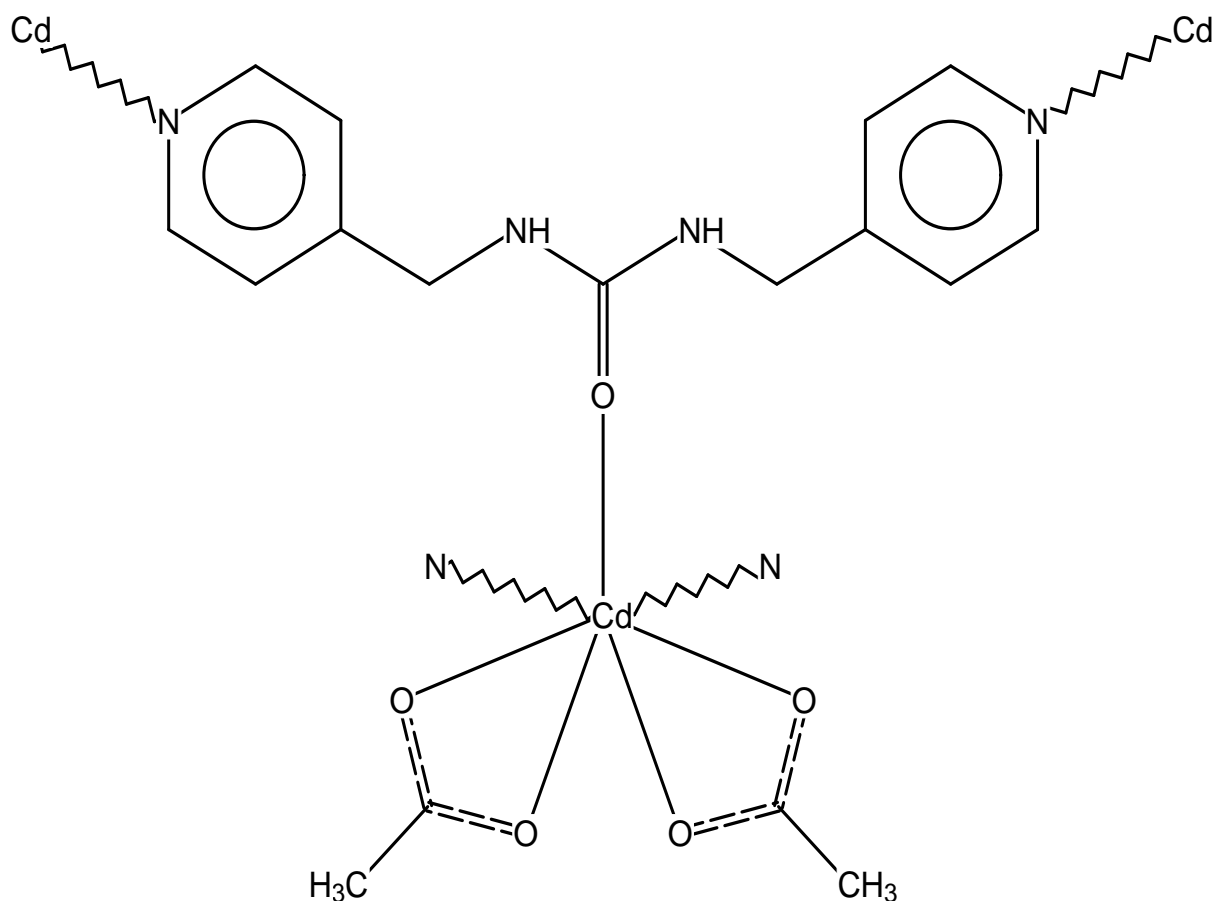



## Search: search3 (Sun Nov 20 19:32:00 2011): Hit 3

### NOGROQ

**Reference:** M.J.Plater, B.M.de Silva, J.M.S.Skakle, R.A.Howie, A.Riffat, T.Gelbrich, M.B.Hursthouse (2001) *Inorg.Chim.Acta* ,**325**,141

**Formula:** (C<sub>26</sub> H<sub>30</sub> Cu<sub>1</sub> N<sub>9</sub> O<sub>6</sub><sup>1+</sup>)<sub>n</sub>,n(N<sub>1</sub> O<sub>3</sub><sup>1-</sup>),n(H<sub>2</sub> O<sub>1</sub>)

**Compound Name:** catena-(bis(μ<sub>2</sub>-N,N'-bis(4-pyridylmethyl)urea)-aqua-nitrato-copper(ii) nitrate monohydrate)

**Space Group:** P21/n      **Cell:**      **a** 13.539(0)      **b** 17.772(0)      **c** 13.585(0)  
**Space Group No.:** 14      **(Å, °)**      **α** 90.00      **β** 107.83(0)      **γ** 90.00

**R-Factor (%):** 4.83      **Temperature(K):** 293      **Density(g/cm<sup>3</sup>):** 1.511

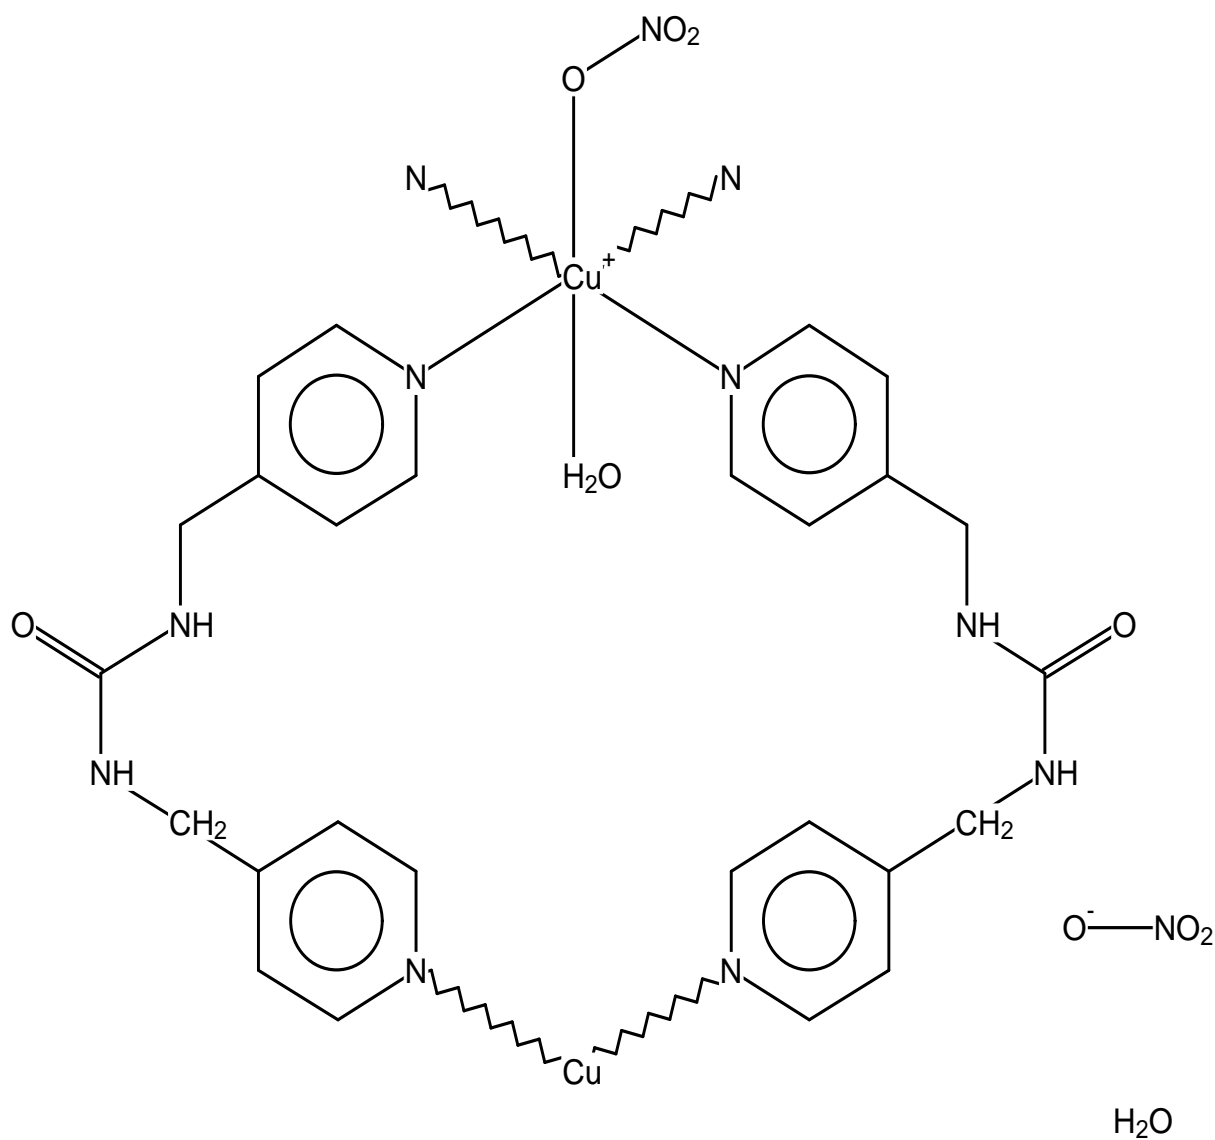

## Search: search3 (Sun Nov 20 19:32:00 2011): Hit 4

NOGXAI

**Reference:** M.J.Plater, B.M.de Silva, J.M.S.Skakle, R.A.Howie, A.Riffat, T.Gelbrich, M.B.Hursthouse (2001) *Inorg.Chim.Acta* ,**325**,141

**Formula:** (C<sub>26</sub> H<sub>30</sub> Cd<sub>1</sub> N<sub>9</sub> O<sub>6</sub><sup>1+</sup>)<sub>n</sub>,n(N<sub>1</sub> O<sub>3</sub><sup>1-</sup>),n(H<sub>2</sub> O<sub>1</sub>)

**Compound Name:** catena-(bis(μ<sub>2</sub>-N,N'-bis(4-pyridylmethyl)urea)-aqua-nitrato-cadmium(ii) nitrate monohydrate)

**Space Group:** P21/n      **Cell:**      **a** 13.410(0)      **b** 17.642(0)      **c** 14.005(0)  
**Space Group No.:** 14      **(Å, °)**      **α** 90.00      **β** 106.90(0)      **γ** 90.00

**R-Factor (%):** 3.65      **Temperature(K):** 150      **Density(g/cm<sup>3</sup>):** 1.586

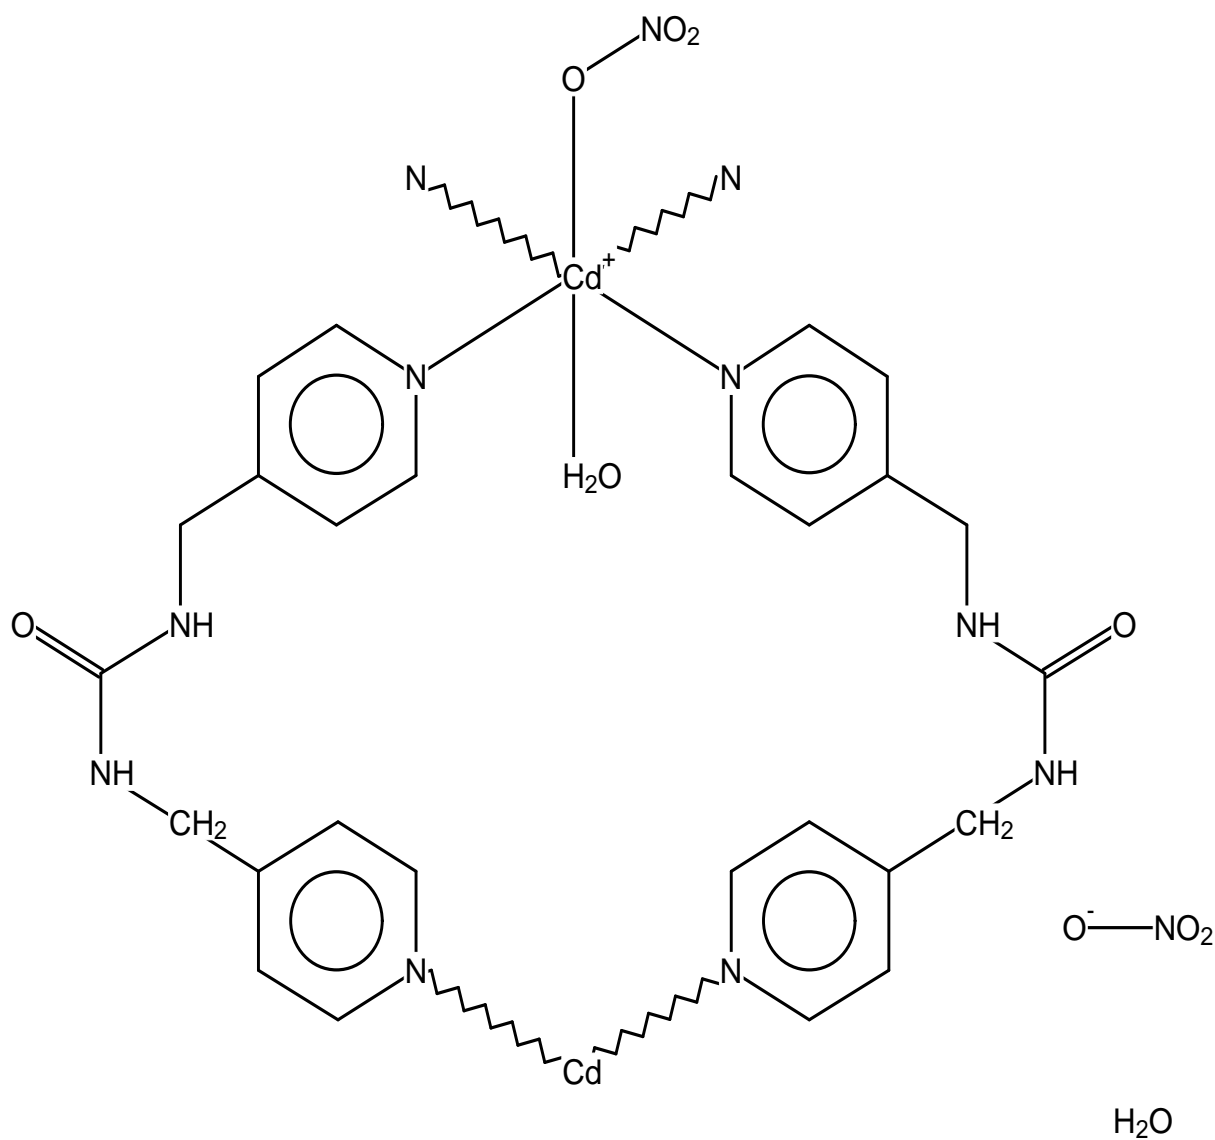

## Search: search3 (Sun Nov 20 19:32:00 2011): Hit 5

VEDYAF

**Reference:** P.Diaz, J.Benet-Buchholz, R.Vilar, A.J.P.White (2006)  
*Inorg.Chem.* ,**45**,1617

**Formula:** (C<sub>26</sub> H<sub>30</sub> Cl<sub>1</sub> Cu<sub>1</sub> N<sub>8</sub> O<sub>3</sub>)<sub>n</sub>,<sub>1</sub>0.92n(H<sub>2</sub> O<sub>1</sub>)

**Compound Name:** catena-(bis(μ<sub>2</sub>-1,3-bis(4-Pyridylmethyl)urea-N,N')-aqua-chloro-copper(ii) hydrate)

**Space Group:** P21/n      **Cell:**      **a** 9.107(0)      **b** 23.983(0)      **c** 18.080(0)  
**Space Group No.:** 14      **(Å, °)**      α 90.00      β 97.56(0)      γ 90.00

**R-Factor (%):** 8.36      **Temperature(K):** 90      **Density(g/cm<sup>3</sup>):** 1.354

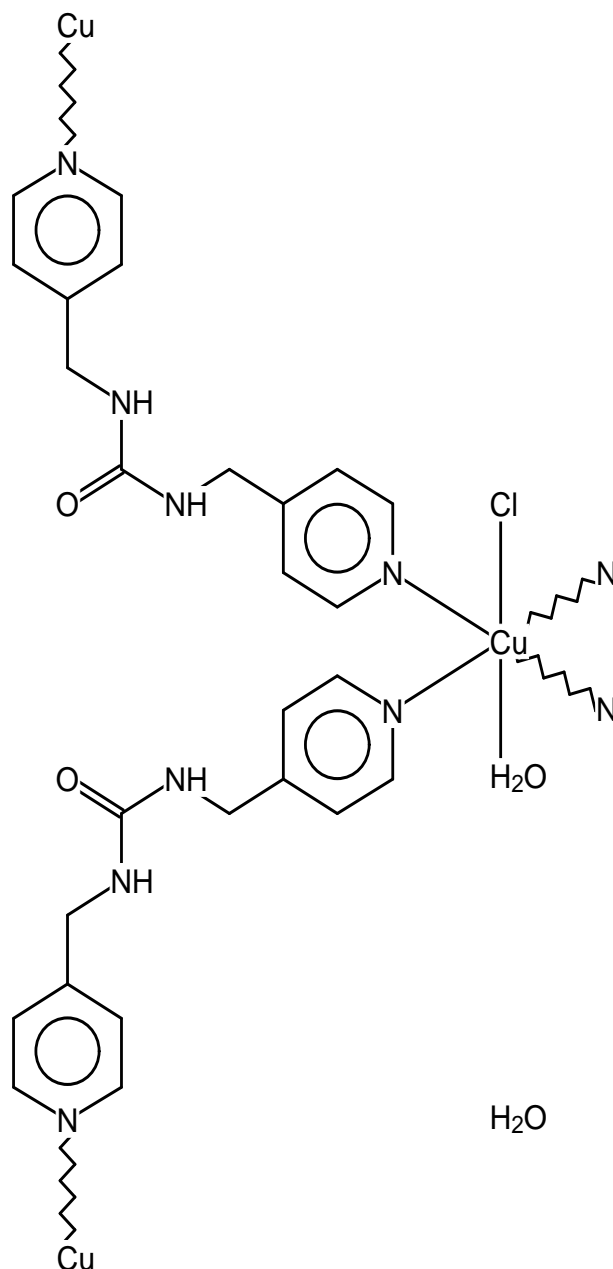

## Search: search3 (Sun Nov 20 19:32:00 2011): Hit 6

VEDYEJ

**Reference:** P.Diaz, J.Benet-Buchholz, R.Vilar, A.J.P.White (2006)  
*Inorg.Chem.* ,**45**,1617

**Formula:** (C<sub>17</sub> H<sub>20</sub> Cu<sub>1</sub> N<sub>4</sub> O<sub>5</sub>)<sub>n</sub>

**Compound Name:** catena-((μ<sub>3</sub>-1,3-bis(4-Pyridylmethyl)urea-N,N',O)-bis(acetato-O)-copper(ii))

**Space Group:** P21/n      **Cell:**      **a** 9.205(0)      **b** 18.367(1)      **c** 10.837(0)  
**Space Group No.:** 14      **(Å, °)**      **α** 90.00      **β** 93.80(0)      **γ** 90.00

**R-Factor (%):** 4.48      **Temperature(K):** 293      **Density(g/cm<sup>3</sup>):** 1.540

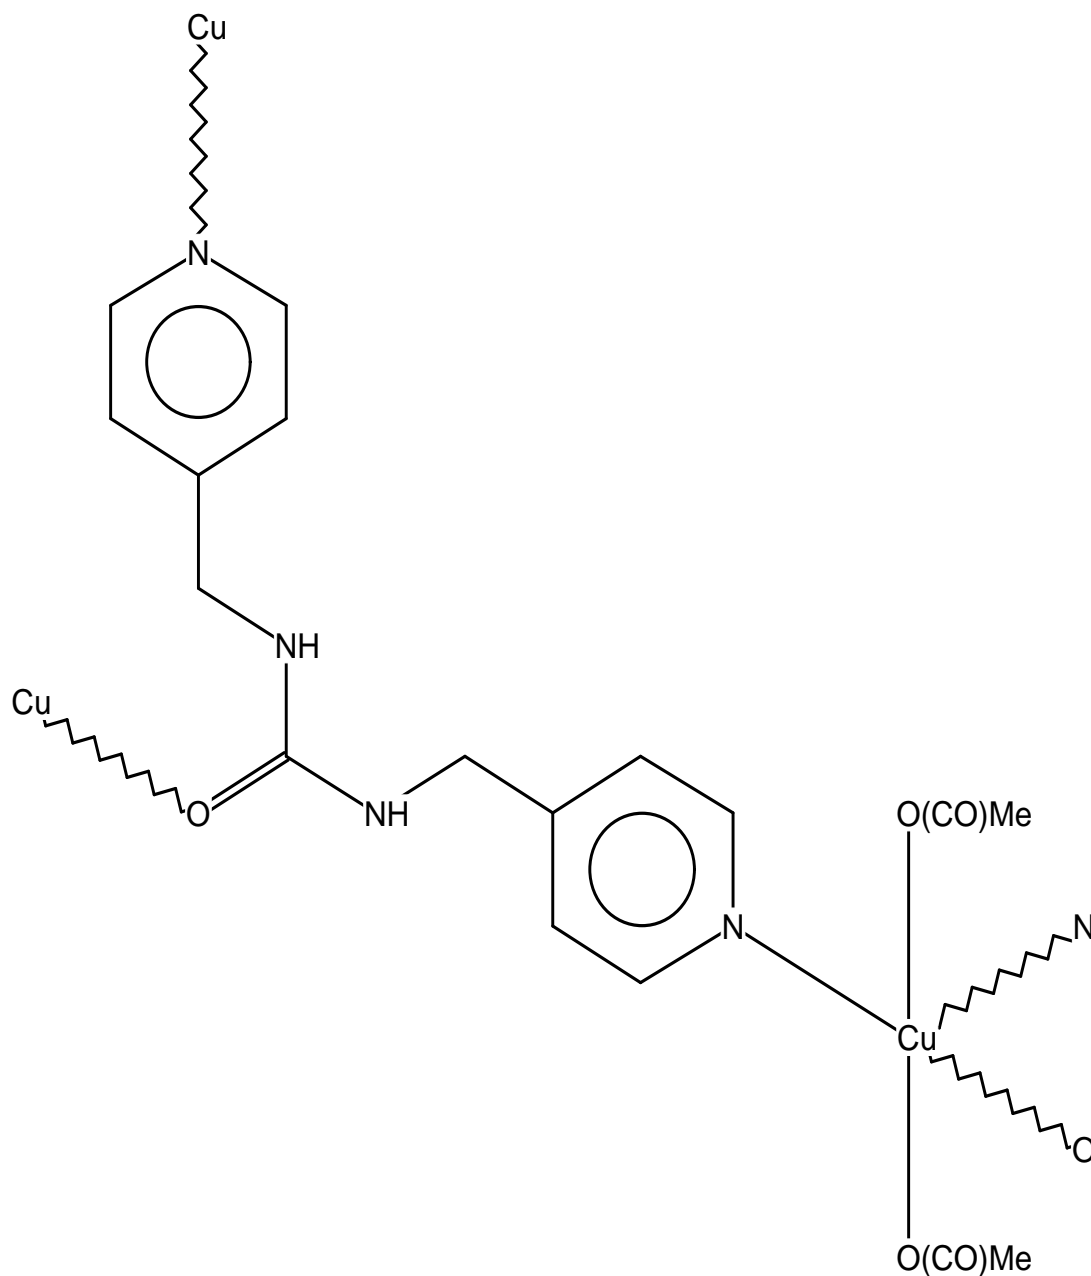

## Search: search3 (Sun Nov 20 19:32:00 2011): Hit 7

### VEDYIN

**Reference:** P.Diaz, J.Benet-Buchholz, R.Vilar, A.J.P.White (2006)  
*Inorg.Chem.* ,**45**,1617

**Formula:**  $(C_{52}H_{64}Cu_2N_{16}O_8^{4+})_n, 2n(O_4S_1^{2-}), 4n(H_2O_1)$

**Compound Name:** catena-(tetrakis( $\mu_2$ -1,3-bis(4-Pyridylmethyl)urea-N,N')-tetra-aqua-di-copper(ii) bis(sulfate) tetrahydrate)

**Space Group:** C2/c      **Cell:**    **a** 13.693(0)    **b** 47.613(2)    **c** 14.311(0)  
**Space Group No.:** 15      **(Å, °)**     $\alpha$  90.00       $\beta$  105.69(0)     $\gamma$  90.00

**R-Factor (%):** 6.22      **Temperature(K):** 173      **Density(g/cm<sup>3</sup>):** 1.589

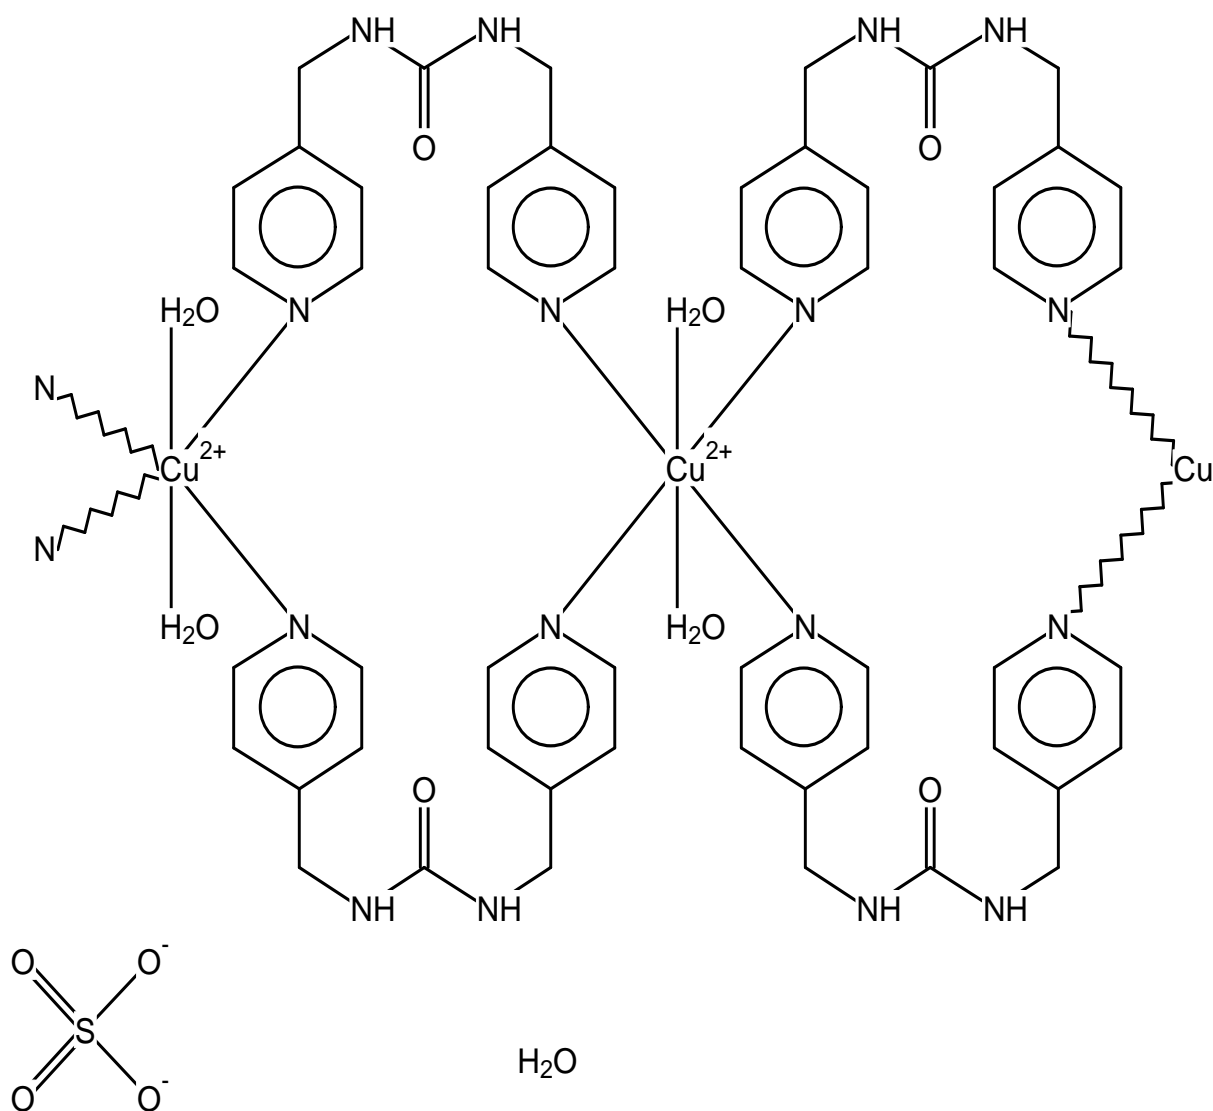

## Search: search3 (Sun Nov 20 19:32:00 2011): Hit 8

XEGXOX

**Reference:** C.L.Schauer, E.Matwey, F.W.Fowler, J.W.Lauher (1998)  
*Crystal Engineering*, 1, 213

**Formula:**  $(C_{13}H_{14}Ag_1N_4O_1^{1+})_n, n(N_1O_3^{1-}), n(H_2O_1)$

**Compound Name:** catena-(( $\mu_2$ -N,N'-bis(4-Pyridylmethyl)urea-N,N')-silver(i) nitrate monohydrate)

**Space Group:** P21/n      **Cell:**      **a** 7.822(0)      **b** 14.753(0)      **c** 14.626(0)  
**Space Group No.:** 14      **(Å, °)**       $\alpha$  90.00       $\beta$  104.40(0)       $\gamma$  90.00

**R-Factor (%):** 4.63      **Temperature(K):** 295      **Density(g/cm<sup>3</sup>):** 1.748

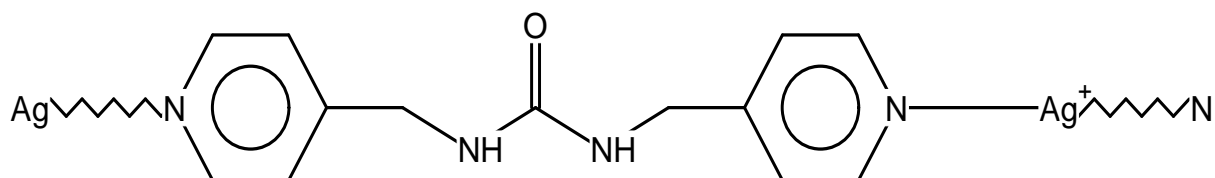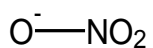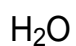

## Search: search3 (Sun Nov 20 19:32:00 2011): Hit 9

YIJBOJ

**Reference:** P.Diaz, J.A.Tovilla, P.Ballester, J.Benet-Buchholz, R.Vilar  
(2007) *Dalton Trans.* ,3516

**Formula:** C<sub>80</sub> H<sub>80</sub> N<sub>8</sub> O<sub>2</sub> P<sub>4</sub> Pd<sub>2</sub> 4+,4(C<sub>1</sub> F<sub>3</sub> O<sub>3</sub> S<sub>1</sub> 1-),1.25(C<sub>3</sub> H<sub>8</sub> O<sub>1</sub>)

**Compound Name:** bis((μ<sub>2</sub>-N,N'-bis(4-Pyridylmethyl)urea)-(1,3-bis(diphenylphosphino)propane)-palladium(ii)) tetrakis(trifluoromethanesulfonate) isopropanol solvate

**Space Group:** P212121    **Cell:**    **a** 18.606(1)    **b** 21.536(1)    **c** 27.110(1)  
**Space Group No.:** 19    **(Å, °)**    **α** 90.00    **β** 90.00    **γ** 90.00

**R-Factor (%):** 8.54    **Temperature(K):** 100    **Density(g/cm<sup>3</sup>):** 1.341

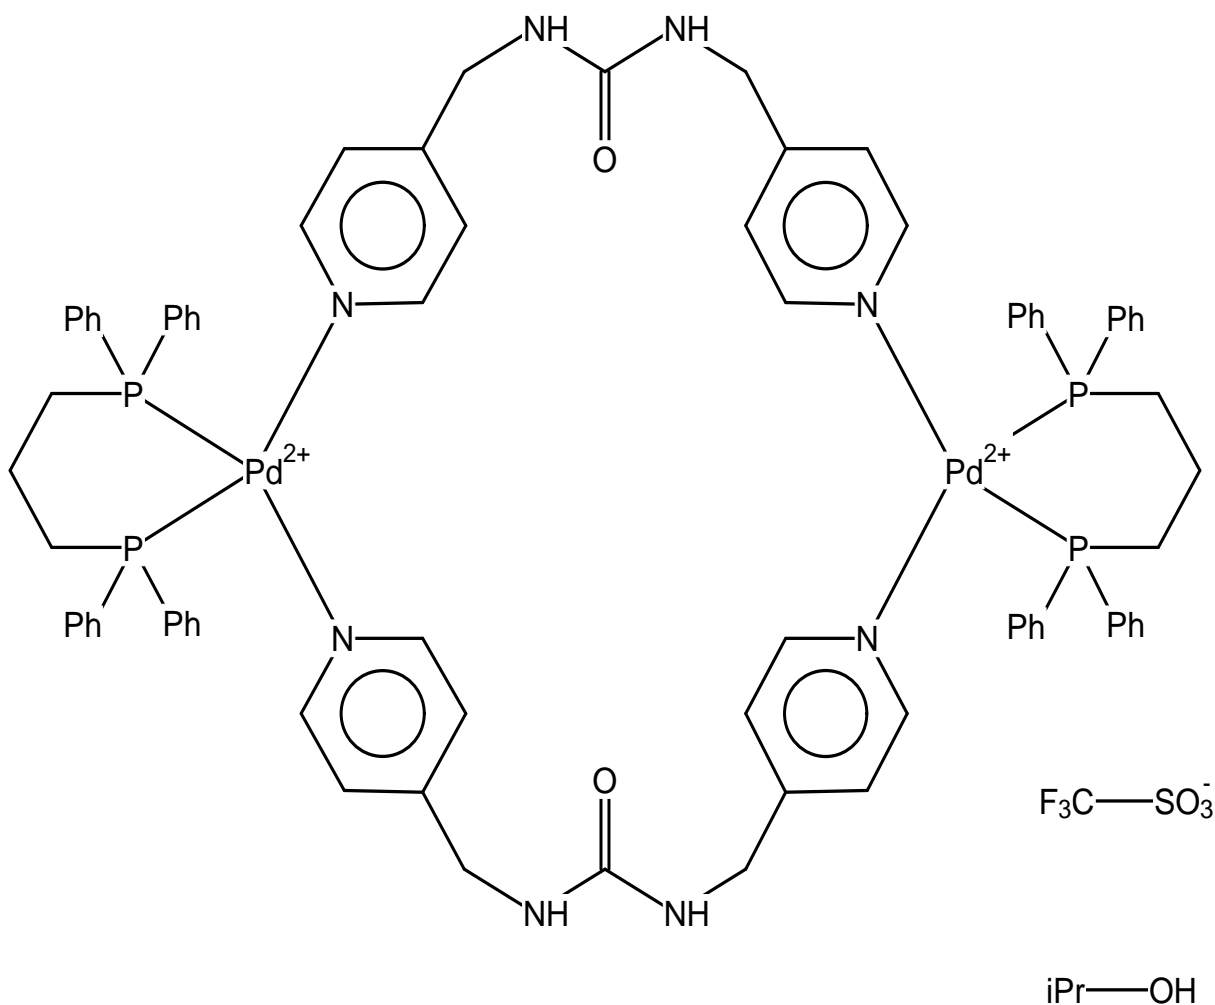

## Search: search3 (Sun Nov 20 19:32:00 2011): Hit 10

YIJCAW

**Reference:** P.Diaz, J.A.Tovilla, P.Ballester, J.Benet-Buchholz, R.Vilar  
(2007) *Dalton Trans.* ,3516

**Formula:**  $C_{94} H_{84} Fe_2 N_8 O_2 P_4 Pd_2^{4+}, 4(C_1 F_3 O_3 S_1^{-}), C_1 H_2 Cl_2, 3(H_2 O_1)$

**Compound Name:** bis( $\mu_2$ -N,N'-bis(4-Pyridylmethyl)urea)-(1,1'-bis(diphenylphosphino)ferrocene)-palladium(ii) tetrakis(trifluoromethanesulfonate) dichloromethane solvate trihydrate

**Space Group:** P-1      **Cell:**    **a** 15.828(3)    **b** 16.901(3)    **c** 20.704(4)  
**Space Group No.:** 2      (**Å, °**)     $\alpha$  71.94(0)     $\beta$  86.14(0)     $\gamma$  87.92(0)

**R-Factor (%):** 9.73      **Temperature(K):** 100      **Density(g/cm<sup>3</sup>):** 1.607

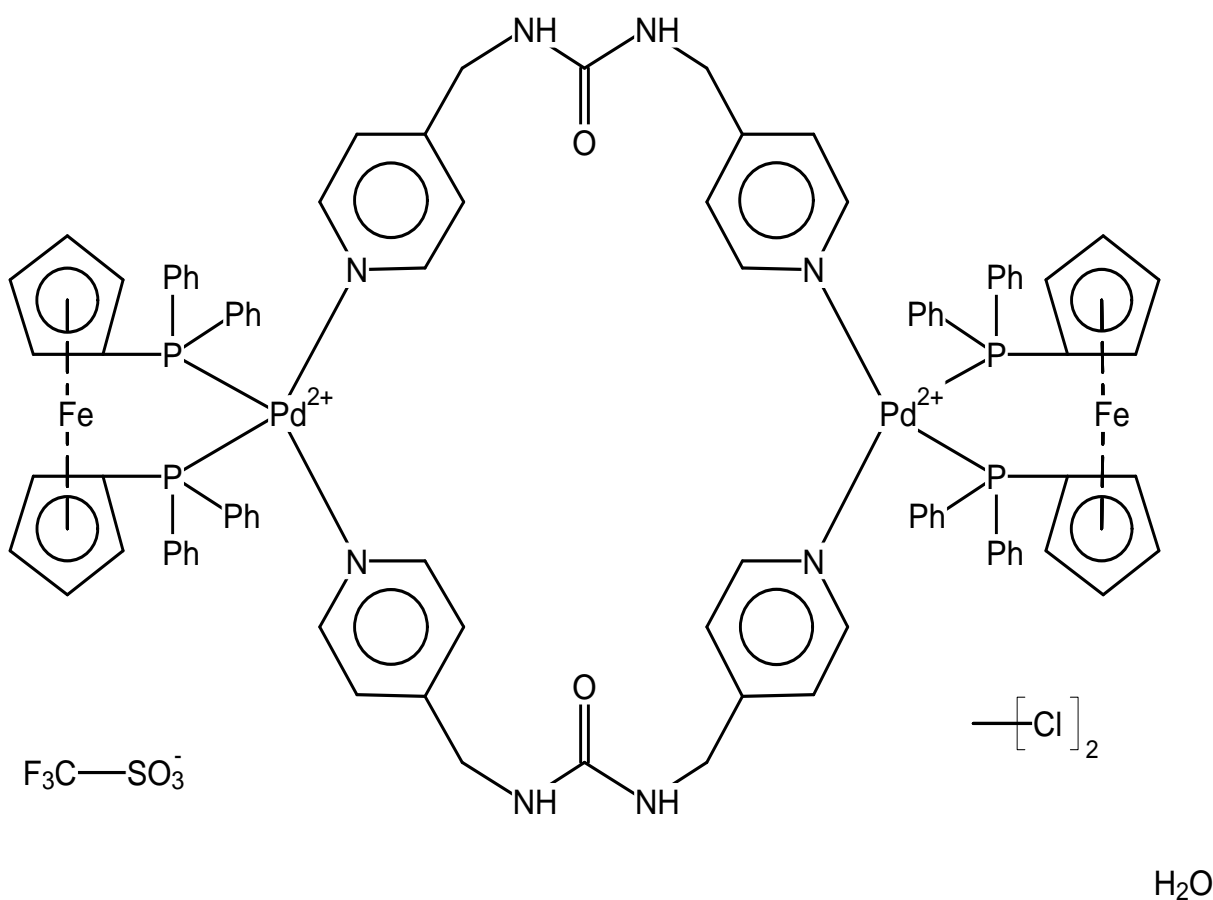



## Search Overview

**Search:** search4  
**Date/Time done:** Sun Nov 20 19:32:48 2011  
**Database(s):** CSD version 5.32 (November 2010)  
CSD version 5.32 updates (Nov 2010)  
**Restriction Info:** No refcode restrictions applied  
**Filters:** None  
**Percentage Completed:** 100%  
**Number of Hits:** 7

*Summary of queries used. Search found structures that:*

match

**Query 1**

**Query 2**

**Query 1**

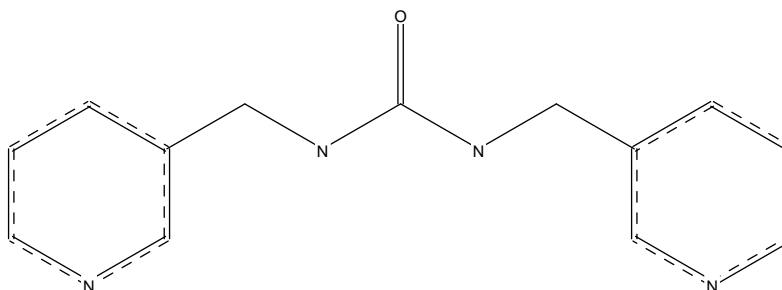

**Query 2**

4M

## Search: search4 (Sun Nov 20 19:32:48 2011): Hit 1

### IPONOQ

**Reference:** M.B.Hursthouse, T.Gelbrich, M.J.Plater (2003)  
*Private Communication*,

**Formula:**  $(C_{26}H_{32}Cu_1N_8O_4^{2+})_n, 2n(N_1O_3^{1-})$

**Compound Name:** catena-(bis( $\mu_2$ -N,N'-bis(Pyrid-3-ylmethyl)urea-N'',N''')-diaqua-copper dinitrate)

|                         |      |                        |                   |                                   |                    |
|-------------------------|------|------------------------|-------------------|-----------------------------------|--------------------|
| <b>Space Group:</b>     | P-1  | <b>Cell:</b>           | <b>a</b> 7.835(0) | <b>b</b> 9.835(0)                 | <b>c</b> 10.284(0) |
| <b>Space Group No.:</b> | 2    | (Å, °)                 | $\alpha$ 81.65(0) | $\beta$ 75.35(0)                  | $\gamma$ 86.90(0)  |
| <b>R-Factor (%):</b>    | 3.06 | <b>Temperature(K):</b> | 150               | <b>Density(g/cm<sup>3</sup>):</b> | 1.551              |

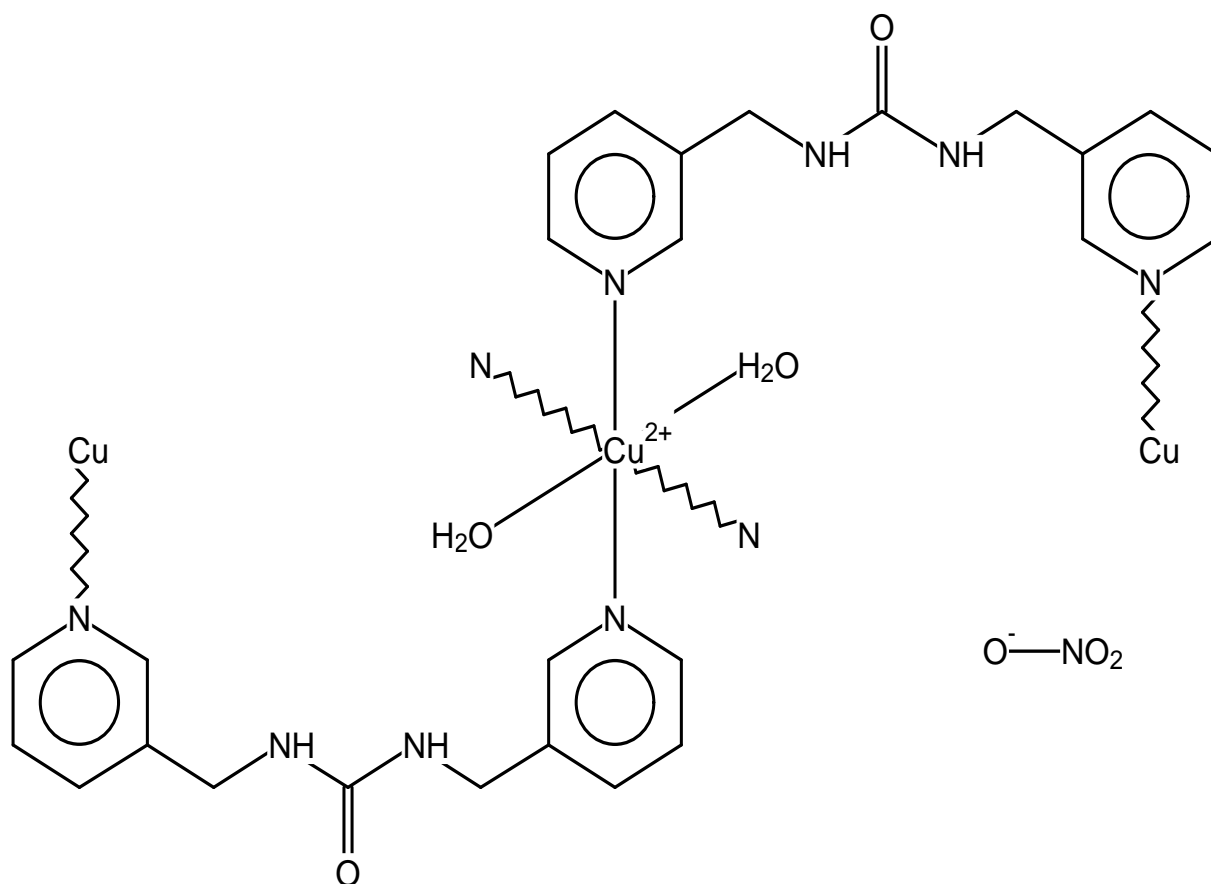

## Search: search4 (Sun Nov 20 19:32:48 2011): Hit 2

### NOGSIL

**Reference:** M.J.Plater, B.M.de Silva, J.M.S.Skakle, R.A.Howie, A.Riffat, T.Gelbrich, M.B.Hursthouse (2001) *Inorg.Chim.Acta* ,**325**,141

**Formula:**  $(C_{26} H_{28} Cu_1 N_{10} O_8)_n, 2n(C_2 H_6 O_1), 2n(H_2 O_1)$

**Compound Name:** catena-(bis( $\mu_2$ -N,N'-bis(3-pyridylmethyl)urea)-bis(nitrato)-copper(ii) ethanol solvate dihydrate)

**Space Group:** P21/c      **Cell:**      **a** 9.117(0)      **b** 21.558(1)      **c** 9.122(0)  
**Space Group No.:** 14      **(Å, °)**       $\alpha$  90.00       $\beta$  96.27(1)       $\gamma$  90.00

**R-Factor (%):** 4.51      **Temperature(K):** 150      **Density(g/cm<sup>3</sup>):** 1.491

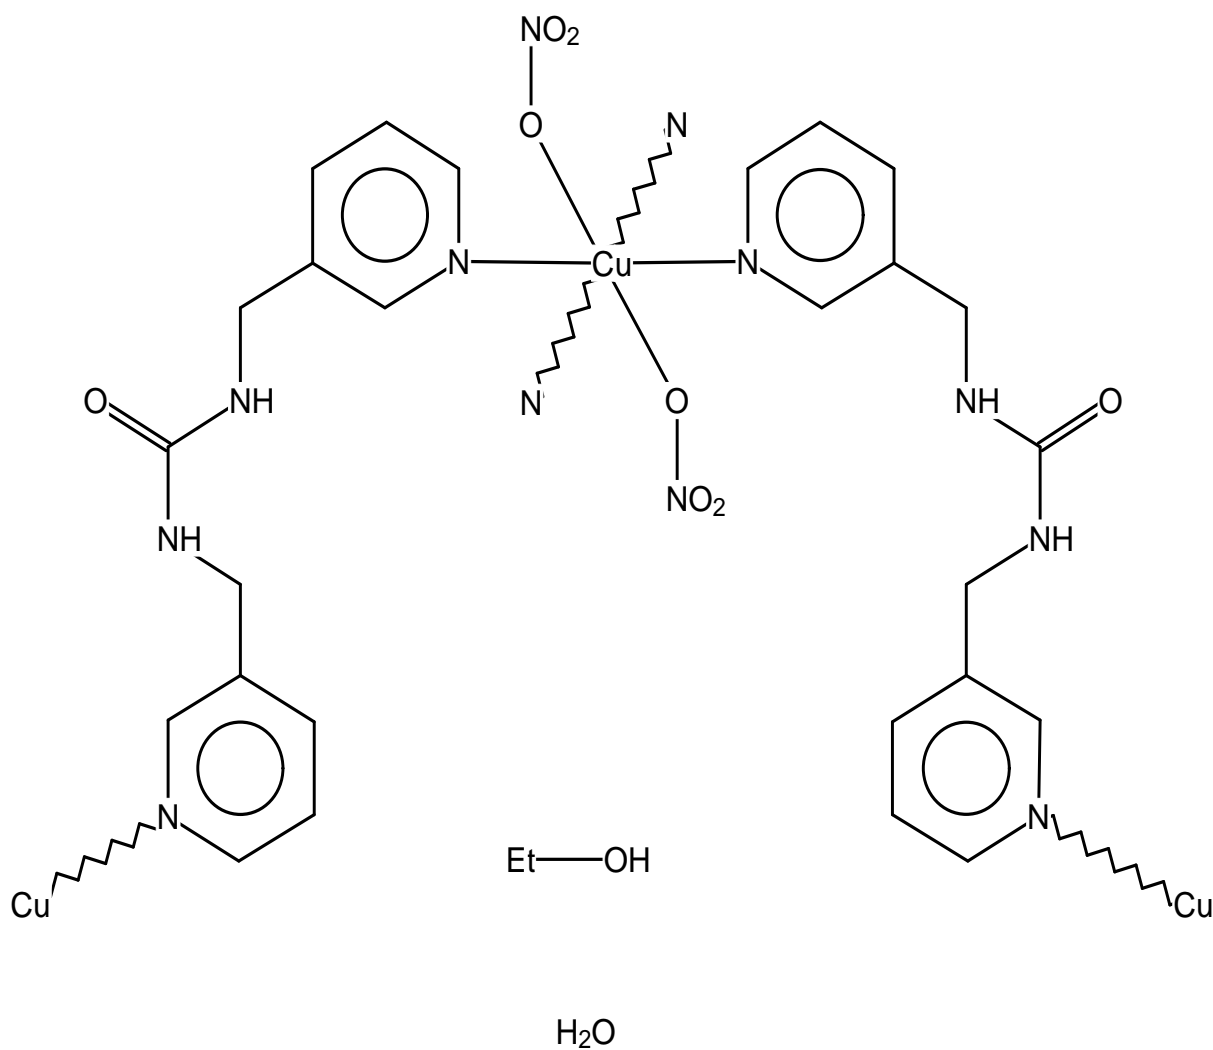

## Search: search4 (Sun Nov 20 19:32:48 2011): Hit 3

### NOGXEM

**Reference:** M.J.Plater, B.M.de Silva, J.M.S.Skakle, R.A.Howie, A.Riffat, T.Gelbrich, M.B.Hursthouse (2001) *Inorg.Chim.Acta* ,**325**,141

**Formula:** (C<sub>26</sub> H<sub>32</sub> Cd<sub>1</sub> N<sub>8</sub> O<sub>4</sub> <sup>2+</sup>)<sub>n</sub>,2n(N<sub>1</sub> O<sub>3</sub> <sup>1-</sup>)

**Compound Name:** catena-(bis(μ<sub>2</sub>-N,N'-bis(3-pyridylmethyl)urea)-diaqua-cadmium(ii) dinitrate)

**Space Group:** P-1      **Cell:**    **a** 7.838(0)    **b** 10.044(0)    **c** 10.287(0)  
**Space Group No.:** 2      **(Å, °)**    **α** 80.37(0)    **β** 75.84(0)    **γ** 83.93(0)

**R-Factor (%):** 2.84      **Temperature(K):** 150      **Density(g/cm<sup>3</sup>):** 1.628

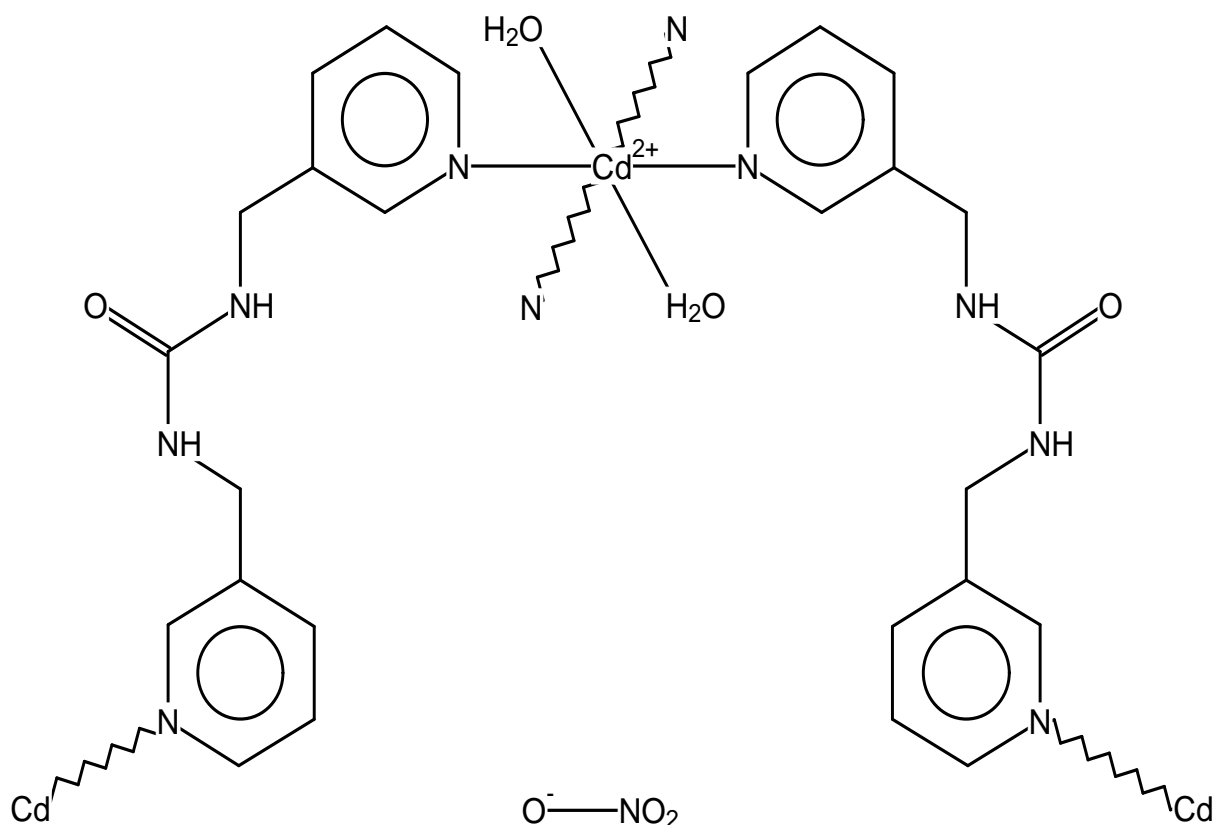

## Search: search4 (Sun Nov 20 19:32:48 2011): Hit 4

NOQSOB

**Reference:** C.L.Schauer, E.Matwey, F.W.Fowler, J.W.Lauher (1997)  
*J.Am.Chem.Soc.* ,**119**,10245

**Formula:** (C<sub>26</sub> H<sub>28</sub> Ag<sub>1</sub> N<sub>8</sub> O<sub>2</sub> 1<sup>+</sup>)<sub>n</sub>,n(B<sub>1</sub> F<sub>4</sub> 1<sup>-</sup>)

**Compound Name:** catena(bis(μ<sub>2</sub>-N,N'-bis(3-Pyridylmethyl)-urea)-silver tetrafluoroborate)

**Space Group:** P-4      **Cell:**      **a** 11.984(2)      **b** 11.984(2)      **c** 4.625(1)  
**Space Group No.:** 81      **(Å, °)**      α 90.00      β 90.00      γ 90.00

**R-Factor (%):** 3.20      **Temperature(K):** 295      **Density(g/cm<sup>3</sup>):** 1.698

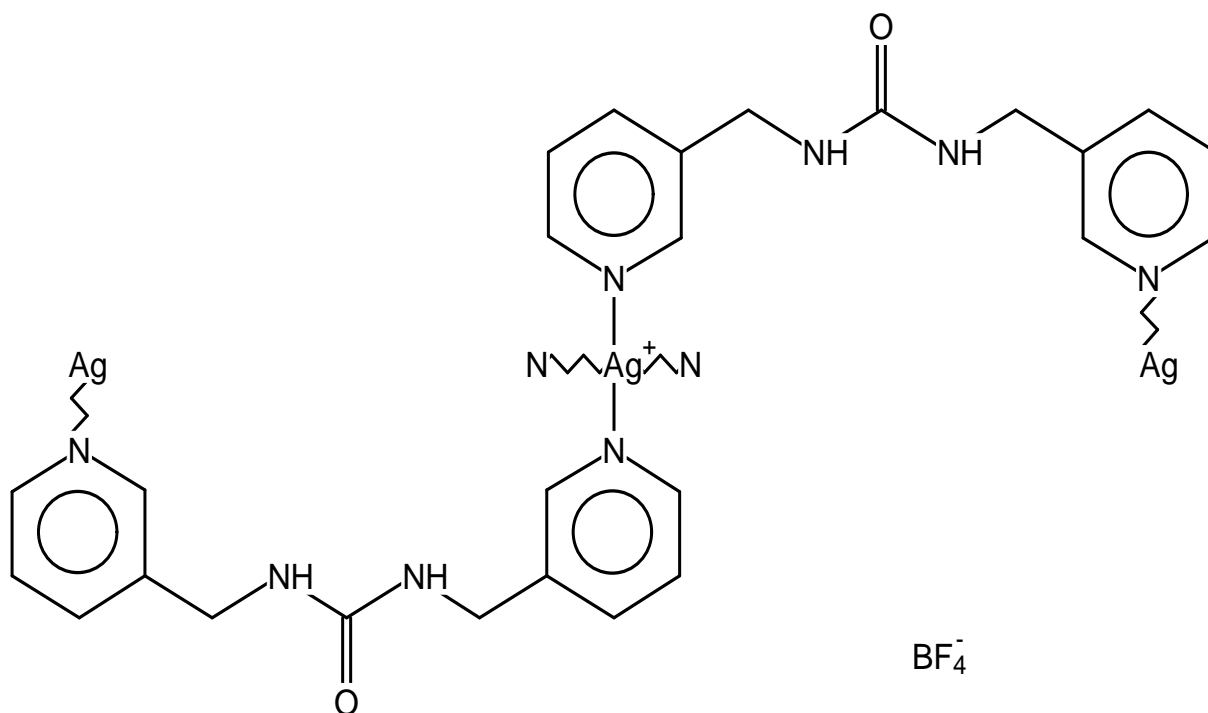

## Search: search4 (Sun Nov 20 19:32:48 2011): Hit 5

### TAPFAS

**Reference:** J.Granifo, M.T.Garland, R.Baggio (2005)  
*Inorg.Chem.Commun.* ,**8**,568

**Formula:** C<sub>46</sub> H<sub>32</sub> Cu<sub>2</sub> F<sub>24</sub> N<sub>8</sub> O<sub>10</sub>

**Compound Name:** bis( $\mu_2$ -N,N'-bis(3-Pyridylmethyl)urea)-tetrakis(hexafluoroacetylacetonato)-di-copper(ii)

**Space Group:** C2/c      **Cell:**    **a** 24.524(3)    **b** 9.042(0)    **c** 27.253(3)  
**Space Group No.:** 15      **(Å, °)**     $\alpha$  90.00       $\beta$  108.90(0)     $\gamma$  90.00

**R-Factor (%):** 5.75      **Temperature(K):** 299      **Density(g/cm<sup>3</sup>):** 1.673

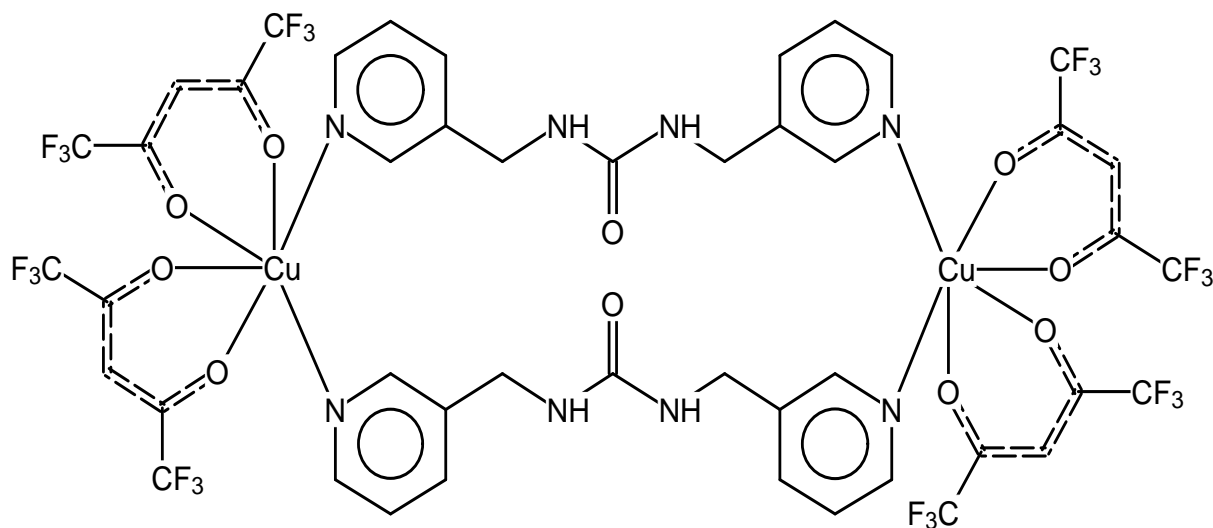

## Search: search4 (Sun Nov 20 19:32:48 2011): Hit 6

### VEDYOT

**Reference:** P.Diaz, J.Benet-Buchholz, R.Vilar, A.J.P.White (2006)  
*Inorg.Chem.* ,**45**,1617

**Formula:** (C<sub>26</sub> H<sub>28</sub> Cl<sub>2</sub> Cu<sub>1</sub> N<sub>8</sub> O<sub>2</sub>)<sub>n</sub>,7n(H<sub>2</sub> O<sub>1</sub>)

**Compound Name:** catena-(bis(μ<sub>2</sub>-1,3-bis(3-Pyridylmethyl)urea-N,N')-dichloro-copper(ii) heptahydrate)

**Space Group:** P21/c      **Cell:**      **a** 11.055(0)      **b** 21.402(0)      **c** 15.442(1)  
**Space Group No.:** 14      **(Å, °)**      **α** 90.00      **β** 105.12(0)      **γ** 90.00

**R-Factor (%):** 5.75      **Temperature(K):** 173      **Density(g/cm<sup>3</sup>):** 1.403

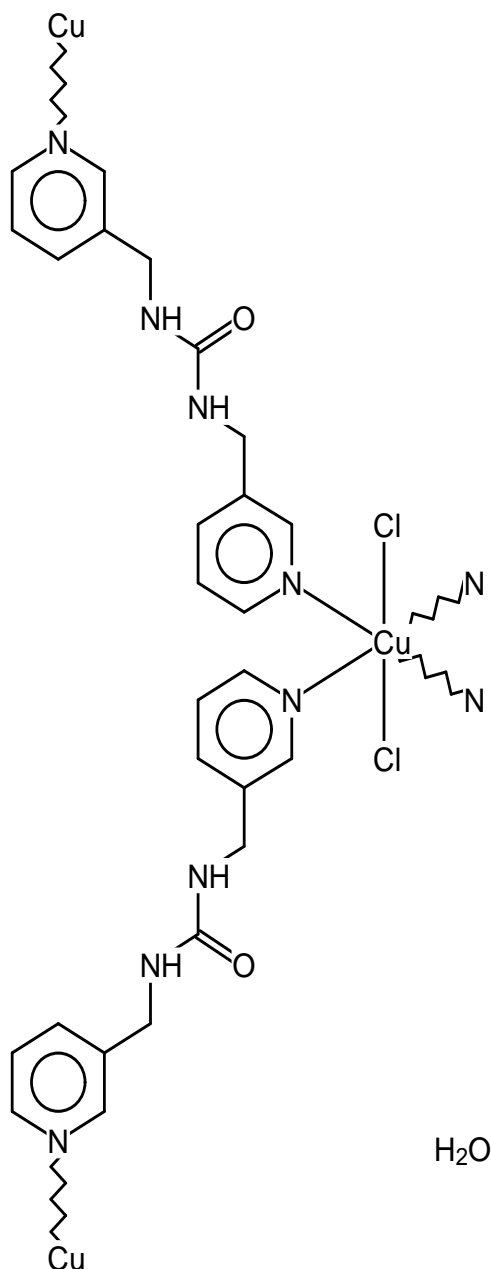

## Search: search4 (Sun Nov 20 19:32:48 2011): Hit 7

VEDYUZ

**Reference:** P.Diaz, J.Benet-Buchholz, R.Vilar, A.J.P.White (2006)  
*Inorg.Chem.* ,**45**,1617

**Formula:**  $(C_{52} H_{60} Cu_2 N_{16} O_6^{4+})_n, 2n(O_4 S_1^{2-}), 11n(H_2 O_1)$

**Compound Name:** catena-(tetrakis( $\mu_2$ -1,3-bis(3-Pyridylmethyl)urea-N,N')-diaqua-di-copper(ii) disulfate undecahydrate)

**Space Group:** Pba2      **Cell:**      **a** 18.419(1)      **b** 20.412(1)      **c** 8.938(0)  
**Space Group No.:** 32      **(Å, °)**       $\alpha$  90.00       $\beta$  90.00       $\gamma$  90.00

**R-Factor (%):** 2.67      **Temperature(K):** 100      **Density(g/cm<sup>3</sup>):** 1.505

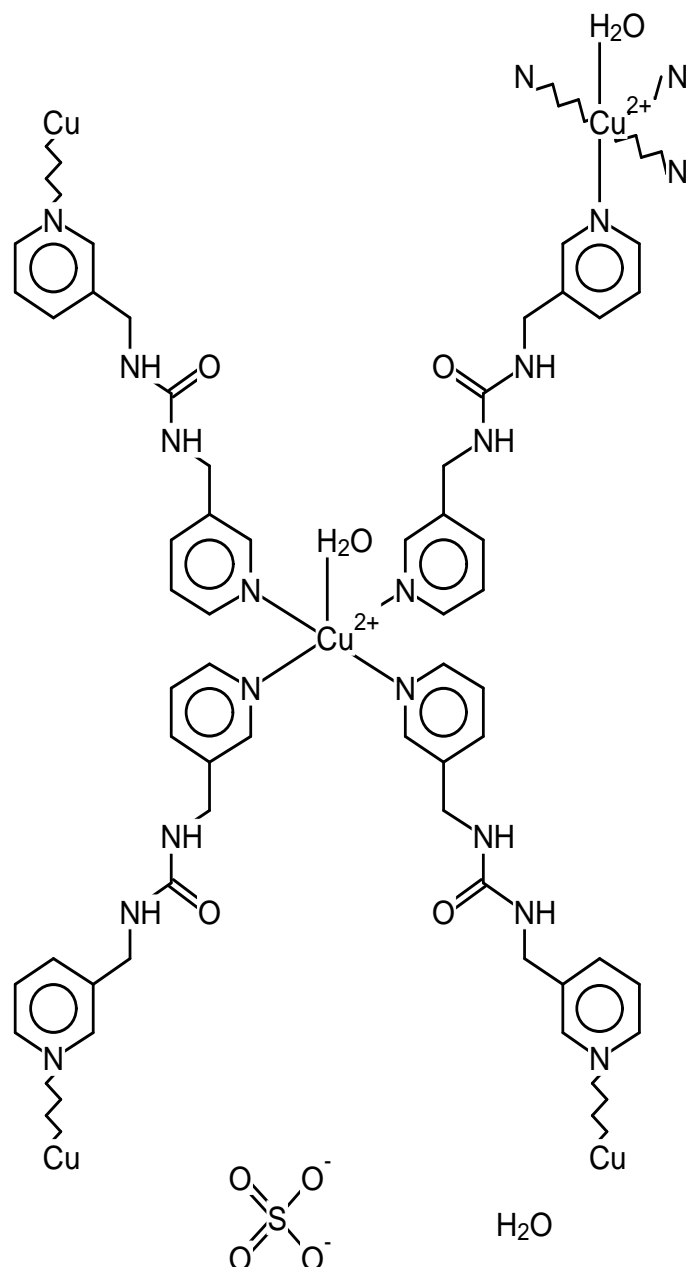



**L44 and L45: 2HITS**

**1**

**Reference:** S. Banerjee, N. N. Adarsh and P. Dastidar, *Eur. J. Inorg. Chem.* **2010**, 3770–3779.

**Formula:** C<sub>13</sub>H<sub>20</sub>CdN<sub>4</sub>O<sub>8</sub>S

**Cell:** a = 8.5328(5), b = 8.9113(5), c = 23.9587(14)

**Space Group:** P2<sub>1</sub>2<sub>1</sub>2<sub>1</sub>

**2**

**Reference:** S. Banerjee, N. N. Adarsh and P. Dastidar, *Eur. J. Inorg. Chem.* **2010**, 3770–3779.

**Formula:** C<sub>24</sub>H<sub>28</sub>CdN<sub>8</sub>O<sub>8</sub>S

**Cell:** a = 8.9312(9), b = 12.6841(13), c = 13.7130(13);  $\alpha = 87.699(2)$ ;  $\beta = 81.445(2)$ ;  $\gamma = 82.031(2)$

**Space Group:** P-1
